# Supplementary material for: Homoallenylboration of carbonyl compounds using inert 2-pinacolateboryl 1,3-butadienes via in situ generated borinic–TFA mixed anhydrides: efficient synthesis of homoallenyl alcohols
Source: Royal Society of Chemistry journal article supplement (doi:10.1039/d2qo01705a), 2022-12-06

## Supporting Information

### **Homoallenylboration of Carbonyl Compounds Using Inert 2-Pinacolateboryl 1,3-Butadienes via in-situ Generated Borinic-TFA Mixed Anhydrides: Efficient Synthesis of Homoallenyl Alcohols**

Hua-Xing Hu,<sup>a</sup> Xin-Ru Ma,<sup>a</sup> Qin Zhong,<sup>\*a</sup> Qiang Chen,<sup>b</sup> and Jian Zhao<sup>\*a</sup>

<sup>a</sup> H.-X. Hu, X.-R. Ma, Prof. Dr. Q. Zhong, Dr. J. Zhao

School of Chemistry and Chemical Engineering, Nanjing University of Science and Technology, Nanjing 210094, China.

E-mail: zq304@njust.edu.cn; jzhao@njust.edu.cn

<sup>b</sup> Prof. Dr. Q. Chen

School of Chemical Engineering and Technology, The Key Lab of Low-Carbon Chemistry & Energy Conservation of Guangdong Province, Sun Yat-sen University, Zhuhai 519082, China

## Electronic Supplementary Information

### Table of Contents

|                                                                                                                                                       |           |
|-------------------------------------------------------------------------------------------------------------------------------------------------------|-----------|
| <b>1. General Information</b>                                                                                                                         | <b>1</b>  |
| <b>2. Materials</b>                                                                                                                                   | <b>1</b>  |
| <b>3. Experimental Procedures and Spectral Data</b>                                                                                                   | <b>2</b>  |
| 3.1 Initial attempts of homoallenylboration of 4-bromobenzaldehyde 2a with<br>2-pinacolateboron 1,3-butadiene 1a                                      | 2         |
| 3.2 Representative Procedure for the synthesis of homoallenyl alcohols                                                                                | 3         |
| 3.3 Procedure for the synthesis of homoallenyl tertiary alcohols (5aa-5ad and 5af-5ah)                                                                | 15        |
| 3.4 Procedure for the synthesis of homoallenyl tertiary alcohols 5ae                                                                                  | 18        |
| 3.5 Procedure for the synthesis of acetyl-protected derivatives (5ac-Ac, 5ad-Ac and 5ae-Ac)                                                           | 19        |
| 3.6 Gold-catalyzed cycloisomerization of homoallenyl alcohol 3ia to 3ia-dihydropyran                                                                  | 21        |
| 3.7 Determination of the stereochemistry of 3ia-dihydropyran using a NOESY spectrum                                                                   | 22        |
| 3.8 Procedure for the synthesis of 1a-BOH                                                                                                             | 23        |
| 3.9 Procedure for the synthesis of 2,3-dimethylbutane-2,3-diyl bis(2,2,2-trifluoroacetate) 6                                                          | 24        |
| 3.10 Evidence for the formation of 1a-ate : $^1\text{H}$ and $^{11}\text{B}$ NMR analysis of reaction                                                 | 25        |
| 3.11 Monitoring the course of the reaction by $^1\text{H}$ and $^{11}\text{B}$ NMR                                                                    | 26        |
| 3.12 HRMS measurement of reaction mixture after secondary injection of additional TFAA:<br>Evidence for the formation of 1a-TFA mixed anhydride and 6 | 31        |
| 3.13 $^{11}\text{B}$ NMR analysis of reaction with $(\text{CHF}_2\text{CO})_2\text{O}$ : Evidence for reactive specie S2                              | 33        |
| 3.14 $^{11}\text{B}$ NMR analysis of reaction for the synthesis of 1a-TFA mixed anhydride using<br>crude 1a-BOH and TFAA                              | 35        |
| <b>4 References</b>                                                                                                                                   | <b>36</b> |
| <b>5 <math>^1\text{H}</math>, <math>^{13}\text{C}</math> and <math>^{11}\text{B}</math> NMR Spectra</b>                                               | <b>37</b> |

## 1 General Information.

$^1\text{H}$  NMR and  $^{13}\text{C}$  NMR spectra were recorded on BRUKER AVANCE III (500 MHz) or JEOL JNM-ECZ400S/L1 (400 MHz) spectrometers.  $^{11}\text{B}$  NMR spectra were recorded on JEOL JNM-ECZ400S/L1 (400 MHz) spectrometers.  $^1\text{H}$  NMR and  $^{13}\text{C}$  NMR spectra were recorded in  $\text{CDCl}_3$  (internal standard: 7.26 ppm,  $^1\text{H}$ ; 77.0 ppm,  $^{13}\text{C}$ ),  $\text{THF-d}_8$  (internal standard: 3.58, 1.72 ppm,  $^1\text{H}$ ; 67.4, 25.3 ppm,  $^{13}\text{C}$ ), and  $\text{DMSO-d}_6$  (internal standard: 2.49 ppm,  $^1\text{H}$ ; 39.5 ppm,  $^{13}\text{C}$ ). High-resolution mass spectra (HRMS) were obtained on a Thermo Scientific Q Exactive Combined Quadrupole Orbitrap Mass Spectrometer and Waters Xevo G2QTOF Mass Spectrometer. Column chromatography and filtration via silica plug were carried out employing silica gel (Qingdao Haiyang Chem, neutral, 300-400 Mesh). Analytical thin-layer chromatography (TLC) was performed on 0.2 mm precoated plate Kieselgel 60 F254 (Merck).

## 2 Materials

Unless otherwise noted, commercially available chemicals were used as received. 2-pinacolateboryl 1,3-butadienes **1** were prepared according to reported procedures by Tsuji<sup>[1]</sup> and us<sup>[2]</sup>. The product **3be** was unambiguously confirmed by  $^1\text{H}$ - and  $^{13}\text{C}$  NMR comparing with the reported literature.<sup>[3]</sup> The structures of new products were determined by  $^1\text{H}$  NMR,  $^{13}\text{C}$  NMR,  $^{11}\text{B}$  NMR and high-resolution mass.

### 3 Experimental Procedures and Spectral Data

#### 3.1 Initial attempts of homoallenylboration of 4-bromobenzaldehyde **2a** with 2-pinacolateboyl 1,3-butadiene **1a**.

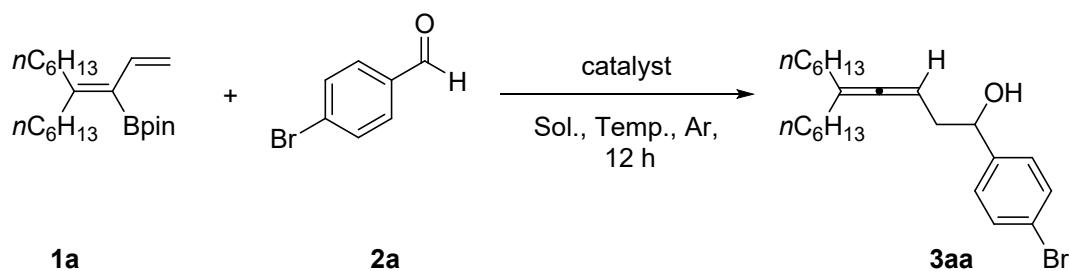

**Table S1.** Initial optimization of homoallenylboration.<sup>[a]</sup>

| Entry            | Catalyst<br>(20 mol%)              | Temp.          | Sol.    | Recovery of <b>1a</b> /% <sup>[b]</sup> | Yield of <b>3aa</b> /% <sup>[b]</sup> |
|------------------|------------------------------------|----------------|---------|-----------------------------------------|---------------------------------------|
| 1                | - <sup>[c]</sup>                   | r.t.           | Toluene | 100                                     | 0                                     |
| 2                | - <sup>[c]</sup>                   | 80 °C          | Toluene | 96                                      | 0                                     |
| 3                | C <sub>6</sub> F <sub>5</sub> COOH | 80 °C          | Toluene | 93                                      | 0                                     |
| 4                | (PhO) <sub>2</sub> P(O)OH          | 80 °C          | Toluene | 95                                      | 0                                     |
| 5 <sup>[d]</sup> | Sc(OTf) <sub>3</sub>               | r.t.           | Toluene | 0                                       | 0                                     |
| 6 <sup>[d]</sup> | AlCl <sub>3</sub>                  | r.t.           | Toluene | 0                                       | 0                                     |
| 7 <sup>[d]</sup> | BF <sub>3</sub> ·OEt <sub>2</sub>  | -78 °C to r.t. | DCM     | 0                                       | 0                                     |

[a] Unless otherwise stated: **1a** (0.1 mmol) in solvent (1 mL), catalyst (20 mol%) and **2a** (0.15 mmol) were added into the mixture, the resulting solution performed at rt. or 80 °C for 12 hours. [b] Determined by <sup>1</sup>H NMR yield using Naphthene as inert standard. [c] without catalyst. [d] **1a** was completely decomposed in the reaction.

### 3.2 Representative Procedure for the synthesis of homoallenyl alcohols: Homoallenylboration of aldehydes **2** with 2-pinacolboryl 1,3-butadienes **1**.

Step 1: To a stirred solution of 2-pinacolboryl 1,3-butadiene **1a** (104 mg, 0.30 mmol, 1.0 equiv.) in THF (1.5 mL) under Ar at  $-78\text{ }^{\circ}\text{C}$  was added *n*BuLi (0.24 mL, 1.6 M, 0.375 mmol, 1.25 equiv.) dropwise. The solution was then stirred for 20 min at  $-78\text{ }^{\circ}\text{C}$ , at which point TFAA (84  $\mu\text{L}$ , 0.60 mmol, 2.0 equiv.) was added dropwise. The reaction mixture was stirred at  $-78\text{ }^{\circ}\text{C}$  for 45 min. Then, a solution of aldehyde **2a** (83 mg, 0.45 mmol) in THF (1.5 mL) was added at  $-78\text{ }^{\circ}\text{C}$  dropwise. The final reaction mixture was stirred at  $-78\text{ }^{\circ}\text{C}$  for 30 min, then allowed to warm slowly to RT for 14 hours. After completion of reaction, the reaction was quenched with sat.  $\text{NaHCO}_3$  (aq.) and extracted with EtOAc (3 x 10 mL). The combined organic layers were washed with brine, dried over  $\text{MgSO}_4$ , filtered, concentrated in vacuo and used for deprotection of partially formed **3aa-TFA** directly.

Step 2: The crude residue was dissolved in MeOH (5 mL),  $\text{NaHCO}_3$  (126 mg, 1.5 mmol, 5.0 equiv.) was added into the solution in one-pot. The mixture was stirred at r.t. for 12 hours. After completion of deprotection reaction, the reaction was quenched with sat. NaCl (aq.) and extracted with EtOAc (3 x 10 mL). The combined organic phases were dried over  $\text{MgSO}_4$ , filtered and concentrated under reduced pressure. The crude material was purified by flash chromatography using EtOAc/PE (1:200-1:20) as eluent to afford pure **3aa**.

#### Analytical Data:

##### 1-(4-Bromophenyl)-5-hexylundeca-3,4-dien-1-ol (**3aa**)

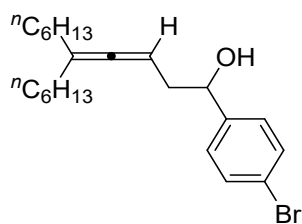

Colorless oil (110 mg, 90%). NMR data:  $^1\text{H}$  NMR (500 MHz,  $\text{DMSO-d}_6$ )  $\delta$  7.46 (d,  $J = 7.8$  Hz, 2H), 7.23 (d,  $J = 7.8$  Hz, 2H), 5.34 (d,  $J = 3.8$  Hz, 1H), 5.01-4.92 (m, 1H), 4.55 (dd,  $J = 10.4, 5.5$  Hz, 1H), 2.36-2.28 (m, 1H), 2.27-2.19 (m, 1H), 1.78-1.65 (m, 4H), 1.26-1.12 (m, 16H), 0.83 (t,  $J = 6.8$  Hz, 6H);  $^{13}\text{C}$  NMR (126 MHz,  $\text{DMSO-d}_6$ )  $\delta$  201.3, 144.6, 130.6, 128.3, 119.6, 102.8, 87.4, 71.8, 39.5, 31.8(4), 31.8(1), 31.1, 28.3(7), 28.3(5), 26.9, 26.8, 22.1, 13.9; HRMS (APCI):  $m/z$   $[\text{M}-(\text{H}_2\text{O})+\text{H}]^+$  calcd. for  $[\text{C}_{23}\text{H}_{34}\text{Br}]^+$  389.18384, found 389.17432.

##### 1-(4-Bromophenyl)-5-hexylundeca-3,4-dien-1-yl 2,2,2-trifluoroacetate (**3aa-TFA**)

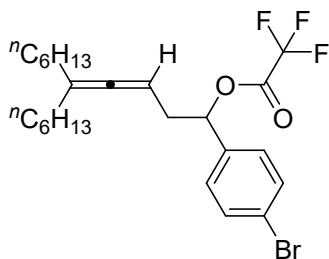

Colorless oil. NMR data:  $^1\text{H}$  NMR (500 MHz, THF- $d_8$ )  $\delta$  7.55 (d,  $J$  = 8.2 Hz, 2H), 7.35 (d,  $J$  = 8.2 Hz, 2H), 5.95 (t,  $J$  = 6.7 Hz, 1H), 5.07-4.90 (m, 1H), 2.77-2.67 (m, 1H), 2.67-2.58 (m, 1H), 1.91-1.78 (m, 4H), 1.37-1.20 (m, 16H), 0.89 (t,  $J$  = 6.5 Hz, 6H);  $^{13}\text{C}$  NMR (126 MHz, THF- $d_8$ )  $\delta$  203.5, 157.0 (q,  $J$  = 41.8 Hz), 138.1, 132.6, 129.7, 123.5, 115.7 (q,  $J$  = 286.4 Hz), 106.2, 86.5, 80.5, 36.6, 33.3, 33.2, 32.7, 30.0(4), 30.0(2), 28.5(1), 28.5(0), 23.6, 14.4; HRMS (ESI):  $m/z$  [M-OTFA] $^+$  calcd. for  $[\text{C}_{23}\text{H}_{34}\text{Br}]^+$  389.18384, found 389.18225.

### 1-(4-Fluorophenyl)-5-hexylundeca-3,4-dien-1-ol (3ab)

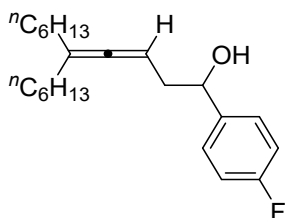

Colorless oil (67 mg, 64%). NMR data:  $^1\text{H}$  NMR (500 MHz, DMSO- $d_6$ )  $\delta$  7.30 (dd,  $J$  = 7.9, 7.9 Hz, 2H), 7.08 (dd,  $J$  = 8.8, 8.8 Hz, 2H), 5.27 (d,  $J$  = 4.1 Hz, 1H), 5.01-4.92 (m, 1H), 4.56 (dd,  $J$  = 10.4, 5.7 Hz, 1H), 2.37-2.28 (m, 1H), 2.27-2.19 (m, 1H), 1.78-1.65 (m, 4H), 1.26-1.13 (m, 16H), 0.83 (t,  $J$  = 6.5 Hz, 6H);  $^{13}\text{C}$  NMR (126 MHz, DMSO- $d_6$ )  $\delta$  201.3, 161.1 (d,  $J$  = 242.1 Hz), 141.3 (d,  $J$  = 2.8 Hz), 127.9 (d,  $J$  = 8.2 Hz), 114.3 (d,  $J$  = 20.9 Hz), 102.7, 87.6, 71.9, 39.7, 31.8(5), 31.8(1), 31.1, 28.3(4), 28.3(2), 26.8, 22.1(1), 22.1(0), 13.8; HRMS (ESI):  $m/z$  [M-( $\text{H}_2\text{O}$ )+H] $^+$  calcd. for  $[\text{C}_{23}\text{H}_{34}\text{F}]^+$  329.26391, found 329.26346.

### 1-(4-Chlorophenyl)-5-hexylundeca-3,4-dien-1-ol (3ac)

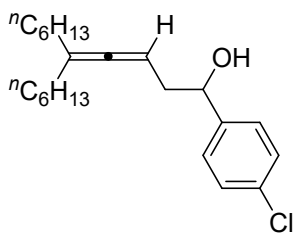

Colorless oil (81mg, 75%). NMR data:  $^1\text{H}$  NMR (500 MHz, DMSO- $d_6$ )  $\delta$  7.32 (d,  $J$  = 8.3 Hz, 2H), 7.28 (d,  $J$  = 8.3 Hz, 2H), 5.33 (d,  $J$  = 3.9 Hz, 1H), 5.01-4.92 (m, 1H), 4.57 (dd,  $J$  = 10.6, 5.7 Hz, 1H), 2.37-2.28 (m, 1H), 2.28-2.20 (m, 1H), 1.81-1.64 (m, 4H), 1.27-1.14 (m, 16H), 0.83 (t,  $J$  = 6.7 Hz, 6H);  $^{13}\text{C}$  NMR (126 MHz, DMSO- $d_6$ )  $\delta$  201.3, 144.1, 131.1, 127.9, 127.7, 102.8, 87.4, 71.8, 39.7, 31.8, 31.7, 31.1, 28.3(3), 28.3(1), 26.8(9), 26.8(7), 22.1, 13.9; HRMS (ESI):  $m/z$  [M-( $\text{H}_2\text{O}$ )+H] $^+$  calcd. for  $[\text{C}_{23}\text{H}_{34}\text{Cl}]^+$  345.23436, found 345.23373.

### 5-Hexyl-1-(4-iodophenyl)undeca-3,4-dien-1-ol (3ad)

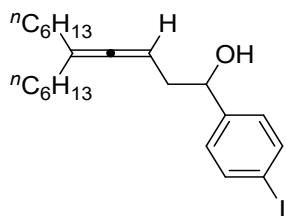

Colorless oil (82 mg, 60%). NMR data:  $^1\text{H}$  NMR (500 MHz,  $\text{DMSO-d}_6$ )  $\delta$  7.62 (d,  $J = 7.8$  Hz, 2H), 7.08 (d,  $J = 7.8$  Hz, 2H), 5.31 (d,  $J = 3.7$  Hz, 1H), 5.01-4.92 (m, 1H), 4.53 (dd,  $J = 10.4, 5.9$  Hz, 1H), 2.36-2.28 (m, 1H), 2.27-2.19 (m, 1H), 1.78-1.65 (m, 4H), 1.26-1.12 (m, 16H), 0.84 (t,  $J = 6.7$  Hz, 6H);  $^{13}\text{C}$  NMR (126 MHz,  $\text{DMSO-d}_6$ )  $\delta$  201.3, 145.0, 136.4, 128.5, 102.8, 92.3, 87.4, 71.9, 39.7, 31.8, 31.7, 31.1, 28.3, 26.9, 26.8, 22.1, 13.9; HRMS (ESI):  $m/z$   $[\text{M}-(\text{H}_2\text{O})+\text{H}]^+$  calcd. for  $[\text{C}_{23}\text{H}_{34}\text{I}]^+$  437.16997, found 437.16852.

### 5-Hexyl-1-phenylundeca-3,4-dien-1-ol (3ae)

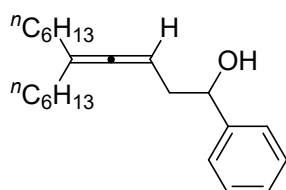

Colorless oil (63 mg, 64%). NMR data:  $^1\text{H}$  NMR (500 MHz,  $\text{DMSO-d}_6$ )  $\delta$  7.27 (d,  $J = 4.2$  Hz, 4H), 7.22-7.17 (m, 1H), 5.23 (d,  $J = 4.0$  Hz, 1H), 5.01-4.92 (m, 1H), 4.54 (dd,  $J = 10.6, 6.1$  Hz, 1H), 2.35-2.29 (m, 1H), 2.26-2.20 (m, 1H), 1.80-1.70 (m, 4H), 1.27-1.15 (m, 16H), 0.84 (t,  $J = 6.6$  Hz, 6H);  $^{13}\text{C}$  NMR (126 MHz,  $\text{DMSO-d}_6$ )  $\delta$  201.3, 145.3, 127.7, 126.6, 126.0, 102.7, 87.9, 72.7, 39.8, 31.8(6), 31.8(3), 31.1, 28.3, 26.9, 22.1, 13.9; HRMS (ESI):  $m/z$   $[\text{M}-(\text{H}_2\text{O})+\text{H}]^+$  calcd. for  $[\text{C}_{23}\text{H}_{35}]^+$  311.27333, found 311.27161.

### 1-([1,1'-Biphenyl]-4-yl)-5-hexylundeca-3,4-dien-1-ol (3af)

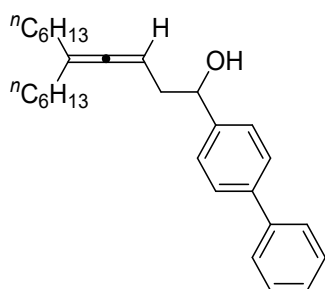

White solid (92 mg, 76%), mp 50.6-50.9 °C; NMR data:  $^1\text{H}$  NMR (500 MHz,  $\text{DMSO-d}_6$ )  $\delta$  7.63 (d,  $J = 7.8$  Hz, 2H), 7.58 (d,  $J = 7.9$  Hz, 2H), 7.43 (t,  $J = 7.6$  Hz, 2H), 7.36 (d,  $J = 7.9$  Hz, 2H), 7.32 (t,  $J = 7.4$  Hz, 1H), 5.27 (d,  $J = 4.0$  Hz, 1H), 5.04-4.97 (m, 1H), 4.60 (dd,  $J = 10.3, 5.8$  Hz, 1H), 2.41-2.34 (m, 1H), 2.33-2.25 (m, 1H), 1.78-1.69 (m, 4H), 1.22-1.10 (m, 16H), 0.78 (t,  $J = 6.4$  Hz, 6H);  $^{13}\text{C}$  NMR (126 MHz,  $\text{DMSO-d}_6$ )  $\delta$  201.3, 144.5, 140.1, 138.5, 128.8, 127.1, 126.7, 126.4, 126.0, 102.8, 87.8, 72.4, 39.7, 31.8(9), 31.8(6), 31.1(7), 31.1(6), 28.4, 26.9, 22.1, 13.8; HRMS (ESI):  $m/z$  calcd. for  $[\text{C}_{29}\text{H}_{40}\text{ONa}]^+$  427.29714, found 427.29572.

### 5-Hexyl-1-(4-methoxyphenyl)undeca-3,4-dien-1-ol (3ag)

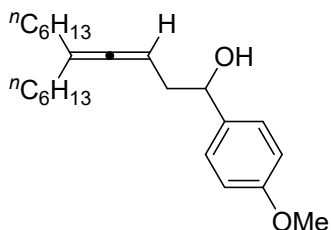

Colorless oil (63 mg, 59%). NMR data:  $^1\text{H}$  NMR (500 MHz,  $\text{DMSO-d}_6$ )  $\delta$  7.18 (d,  $J = 8.2$  Hz, 2H), 6.83 (d,  $J = 8.2$  Hz, 2H), 5.10 (d,  $J = 4.0$  Hz, 1H), 4.98-4.91 (m, 1H), 4.48 (dd,  $J = 10.5, 6.0$  Hz, 1H), 3.70 (s, 3H), 2.34-2.27 (m, 1H), 2.23-2.16 (m, 1H), 1.79-1.71 (m, 4H), 1.25-1.16 (m, 16H), 0.83 (t,  $J = 6.5$  Hz, 6H);  $^{13}\text{C}$  NMR (126 MHz,  $\text{DMSO-d}_6$ )  $\delta$  201.2, 158.0, 137.3, 127.1, 113.1, 102.7, 88.0, 72.3, 54.8, 39.7, 31.8(6), 31.8(4), 31.1(4), 31.1(1), 28.3, 26.9, 22.1, 13.9; HRMS (ESI):  $m/z$  calcd. for  $[\text{C}_{24}\text{H}_{38}\text{O}_2\text{Na}]^+$  381.27640, found 381.27509.

#### 1-(4-(Benzyloxy)phenyl)-5-hexylundeca-3,4-dien-1-ol (3ah)

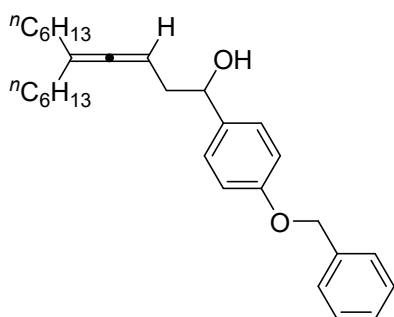

Colorless oil (87 mg, 67%). NMR data:  $^1\text{H}$  NMR (500 MHz,  $\text{DMSO-d}_6$ )  $\delta$  7.41 (d,  $J = 7.4$  Hz, 2H), 7.37 (t,  $J = 7.3$  Hz, 2H), 7.30 (t,  $J = 7.1$  Hz, 1H), 7.18 (d,  $J = 8.4$  Hz, 2H), 6.91 (d,  $J = 8.4$  Hz, 2H), 5.10 (d,  $J = 4.0$  Hz, 1H), 5.05 (s, 2H), 4.99-4.91 (m, 1H), 4.48 (dd,  $J = 10.5, 6.0$  Hz, 1H), 2.35-2.27 (m, 1H), 2.25-2.17 (m, 1H), 1.79-1.71 (m, 4H), 1.25-1.16 (m, 16H), 0.82 (t,  $J = 6.5$  Hz, 6H);  $^{13}\text{C}$  NMR (126 MHz,  $\text{DMSO-d}_6$ )  $\delta$  201.2, 157.2, 137.6, 137.2, 128.3, 127.7, 127.4, 127.2, 114.0, 102.7, 88.0, 72.3, 69.0, 39.7, 31.8(8), 31.8(4), 31.1(7), 31.1(5), 28.3, 26.9, 22.1, 13.9; HRMS (APCI):  $m/z$   $[\text{M}-(\text{H}_2\text{O})+\text{H}]^+$  Calcd. for  $[\text{C}_{30}\text{H}_{41}\text{O}]^+$  417.31519; found 417.30786.

#### 4-(5-hexyl-1-hydroxyundeca-3,4-dien-1-yl)phenyl acetate (3ai)

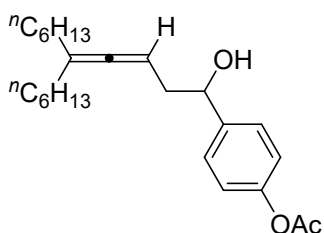

Colorless oil (65mg, 56%). NMR data:  $^1\text{H}$  NMR (500 MHz,  $\text{DMSO-d}_6$ )  $\delta$  7.30 (d,  $J = 8.1$  Hz, 2H), 7.02 (d,  $J = 8.1$  Hz, 2H), 5.28 (d,  $J = 4.0$  Hz, 1H), 5.02-4.92 (m, 1H), 4.55 (dd,  $J = 10.5, 5.9$  Hz, 1H), 2.36-2.28 (m, 1H), 2.27-2.19 (m, 1H), 2.23 (s, 3H), 1.82-1.70 (m, 4H), 1.26-1.16 (m, 16H), 0.83 (t,  $J = 6.9$  Hz, 6H);  $^{13}\text{C}$  NMR (126 MHz,  $\text{DMSO-d}_6$ )  $\delta$  201.3, 169.1, 149.2, 127.0, 121.0, 102.8, 87.8, 72.1, 39.7, 31.8(5), 31.8(2), 31.1, 28.3, 26.9, 22.1, 20.8, 13.9; HRMS (ESI):  $m/z$  calcd. for  $[\text{C}_{25}\text{H}_{38}\text{O}_3\text{Na}]^+$  409.27132, found 409.26969.

#### Methyl 4-(5-hexyl-1-hydroxyundeca-3,4-dien-1-yl)benzoate (3aj)



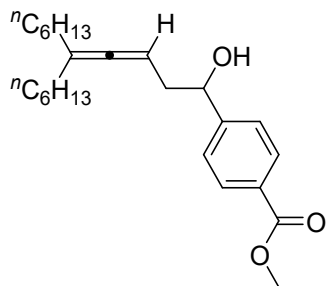

Colorless oil (87 mg, 75%). NMR data:  $^1\text{H}$  NMR (500 MHz,  $\text{DMSO-d}_6$ )  $\delta$  7.89 (d,  $J = 7.8$  Hz, 2H), 7.42 (d,  $J = 7.8$  Hz, 2H), 5.43 (d,  $J = 3.7$  Hz, 1H), 5.03-4.95 (m, 1H), 4.66 (dd,  $J = 10.3, 5.9$  Hz, 1H), 3.81 (s, 3H), 2.39-2.33 (m, 1H), 2.25-2.32 (m, 1H), 1.72-1.64 (m, 4H), 1.25-1.09 (m, 16H), 0.82 (t,  $J = 6.7$  Hz, 6H);  $^{13}\text{C}$  NMR (126 MHz,  $\text{DMSO-d}_6$ )  $\delta$  201.3, 166.1, 150.8, 128.7, 128.0, 126.4, 102.9, 87.3, 72.1, 51.8, 39.7, 31.8(9), 31.8(5), 31.1, 28.4, 26.9, 26.8, 22.1, 13.8; HRMS (ESI):  $m/z$   $[\text{M}-(\text{H}_2\text{O})+\text{H}]^+$  calcd. for  $[\text{C}_{25}\text{H}_{37}\text{O}_2]^+$  369.27881, found 369.27780.

### 5-Hexyl-1-(4-nitrophenyl)undeca-3,4-dien-1-ol (3ak)

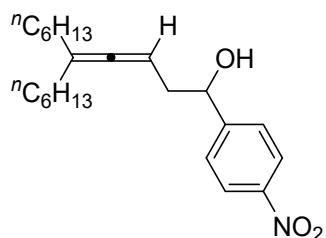

Yellow oil (72 mg, 64%). NMR data:  $^1\text{H}$  NMR (500 MHz,  $\text{DMSO-d}_6$ )  $\delta$  8.17 (d,  $J = 8.5$  Hz, 2H), 7.56 (d,  $J = 8.5$  Hz, 2H), 5.60 (d,  $J = 4.0$  Hz, 1H), 5.05-4.96 (m, 1H), 4.76 (dd,  $J = 10.5, 5.7$  Hz, 1H), 2.41-2.28 (m, 2H), 1.71-1.63 (m, 4H), 1.22-1.05 (m, 16H), 0.82 (t,  $J = 7.0$  Hz, 3H), 0.81 (t,  $J = 7.1$  Hz, 3H);  $^{13}\text{C}$  NMR (126 MHz,  $\text{DMSO-d}_6$ )  $\delta$  201.4, 153.2, 146.2, 127.3, 122.9, 103.0, 86.9, 71.5, 39.7, 31.8(3), 31.8(0), 31.1, 28.3, 26.9, 26.8, 22.1, 13.8; HRMS (ESI):  $m/z$  calcd. for  $[\text{C}_{23}\text{H}_{35}\text{NO}_3\text{Na}]^+$  396.25092, found 396.25012.

### 5-Hexyl-1-(4-(methylsulfonyl)phenyl)undeca-3,4-dien-1-ol (3al)

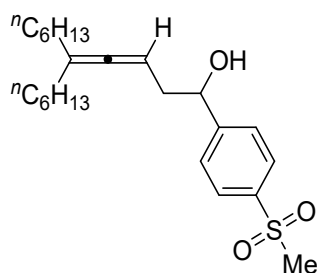

Colorless oil (61 mg, 50%). NMR data:  $^1\text{H}$  NMR (500 MHz,  $\text{DMSO-d}_6$ )  $\delta$  7.84 (d,  $J = 8.1$  Hz, 2H), 7.55 (d,  $J = 8.1$  Hz, 2H), 5.50 (d,  $J = 4.1$  Hz, 1H), 5.04-4.95 (m, 1H), 4.68 (dd,  $J = 10.5, 5.8$  Hz, 1H), 3.15 (s, 3H), 2.39-2.25 (m, 2H), 1.79-1.69 (m, 4H), 1.26-1.14 (m, 16H), 0.83 (t,  $J = 6.4$  Hz, 6H);  $^{13}\text{C}$  NMR (126 MHz,  $\text{DMSO-d}_6$ )  $\delta$  201.4, 151.2, 139.1, 126.9, 126.6, 102.9, 87.3, 71.9, 43.6, 39.7, 31.7, 31.1, 28.2, 26.8, 22.1, 13.9; HRMS (ESI):  $m/z$  calcd. for  $[\text{C}_{24}\text{H}_{38}\text{O}_3\text{SNa}]^+$  429.24339, found 429.24268.

### 5-Hexyl-1-(4-(trifluoromethyl)phenyl)undeca-3,4-dien-1-ol (3am)

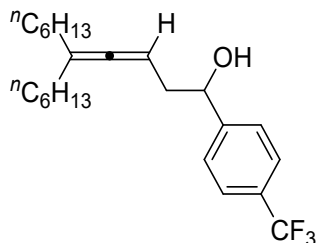

Brown oil (73 mg, 61%). NMR data:  $^1\text{H}$  NMR (500 MHz,  $\text{DMSO-d}_6$ )  $\delta$  7.63 (d,  $J = 7.9$  Hz, 2H), 7.50 (d,  $J = 7.9$  Hz, 2H), 5.48 (d,  $J = 3.9$  Hz, 1H), 5.03-4.95 (m, 1H), 4.68 (dd,  $J = 10.6, 6.0$  Hz, 1H), 2.40-2.33 (m, 1H), 2.32-2.25 (m, 1H), 1.73-1.64 (m, 4H), 1.24-1.10 (m, 16H), 0.82 (t,  $J = 7.0$  Hz, 3H), 0.82 (t,  $J = 7.0$  Hz, 3H);  $^{13}\text{C}$  NMR (126 MHz,  $\text{DMSO-d}_6$ )  $\delta$  201.4, 149.9, 127.3 (q,  $J = 32.2$  Hz), 126.8, 124.6 (q,  $J = 3.7$  Hz), 124.4 (q,  $J = 272.1$  Hz), 102.8, 87.2, 71.8, 39.7, 31.7(7), 31.7(3), 31.0, 28.2, 26.8(7), 26.8(4), 22.1, 13.8; HRMS (ESI):  $m/z$   $[\text{M}-(\text{H}_2\text{O})+\text{H}]^+$  calcd. for  $[\text{C}_{24}\text{H}_{34}\text{F}_3]^+$  379.26071, found 379.25940.

### 5-Hexyl-1-(p-tolyl)undeca-3,4-dien-1-ol (3an)

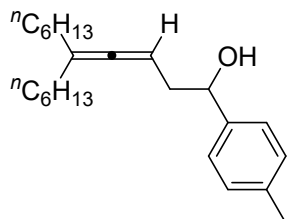

Colorless oil (75mg, 73%). NMR data:  $^1\text{H}$  NMR (500 MHz,  $\text{DMSO-d}_6$ )  $\delta$  7.15 (d,  $J = 7.7$  Hz, 2H), 7.08 (d,  $J = 7.7$  Hz, 2H), 5.15 (d,  $J = 4.0$  Hz, 1H), 5.00-4.90 (m, 1H), 4.49 (dd,  $J = 10.4, 5.8$  Hz, 1H), 2.34-2.27 (m, 1H), 2.25 (s, 3H), 2.25-2.17 (m, 1H), 1.79-1.70 (m, 4H), 1.25-1.15 (m, 16H), 0.83 (t,  $J = 6.6$  Hz, 6H);  $^{13}\text{C}$  NMR (126 MHz,  $\text{DMSO-d}_6$ )  $\delta$  201.2, 142.3, 135.5, 128.3, 126.0, 102.7, 87.9, 72.5, 39.7, 31.8(4), 31.8(1), 31.1, 28.3, 26.8, 22.1(3), 22.1(1), 20.6, 13.9; HRMS (ESI):  $m/z$  calcd. for  $[\text{C}_{24}\text{H}_{38}\text{ONa}]^+$  365.28149, found 365.28067.

### 5-Hexyl-1-(m-tolyl)undeca-3,4-dien-1-ol (3ao)

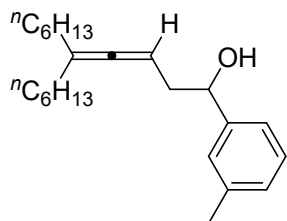

Colorless oil (67 mg, 65%). NMR data:  $^1\text{H}$  NMR (500 MHz,  $\text{DMSO-d}_6$ )  $\delta$  7.15 (dd,  $J = 7.4, 7.4$  Hz, 1H), 7.08 (s, 1H), 7.06 (d,  $J = 7.4$  Hz, 1H), 7.00 (d,  $J = 7.4$  Hz, 1H), 5.17 (d,  $J = 4.0$  Hz, 1H), 5.00-4.94 (m, 1H), 4.49 (dd,  $J = 10.3, 5.7$  Hz, 1H), 2.35-2.28 (m, 1H), 2.26 (s, 3H), 2.25-2.18 (m, 1H), 1.80-1.68 (m, 4H), 1.26-1.15 (m, 16H), 0.83 (t,  $J = 6.3$  Hz, 6H);  $^{13}\text{C}$  NMR (126 MHz,  $\text{DMSO-d}_6$ )  $\delta$  201.2, 145.2, 136.6, 127.6, 127.2, 126.7, 123.1, 102.7, 87.9, 72.7, 39.7, 31.8(6), 31.8(3), 31.1, 28.3, 26.9, 22.1(5), 22.1(3), 21.0, 13.9; HRMS (ESI):  $m/z$   $[\text{M}-(\text{H}_2\text{O})+\text{H}]^+$  calcd. for  $[\text{C}_{24}\text{H}_{37}]^+$  325.28898, found 325.28827.

### 5-Hexyl-1-(o-tolyl)undeca-3,4-dien-1-ol (3ap)

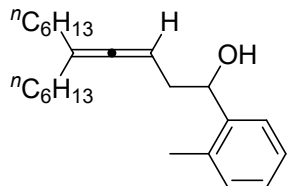

Colorless oil (64 mg, 62%). NMR data:  $^1\text{H}$  NMR (500 MHz,  $\text{DMSO-d}_6$ )  $\delta$  7.38 (d,  $J = 7.5$  Hz, 1H), 7.18-7.11 (m, 1H), 7.11-7.04 (m, 2H), 5.10 (d,  $J = 3.9$  Hz, 1H), 5.07-5.01 (m, 1H), 4.77 (dd,  $J = 10.8, 6.1$  Hz, 1H), 2.28-2.20 (m, 5H), 1.81-1.72 (m, 4H), 1.28-1.16 (m, 16H), 0.83 (t,  $J = 6.5$  Hz, 3H), 0.82 (t,  $J = 6.5$  Hz, 3H);  $^{13}\text{C}$  NMR (126 MHz,  $\text{DMSO-d}_6$ )  $\delta$  201.1, 143.4, 133.7, 129.6, 126.2, 125.6, 125.5, 102.8, 88.2, 69.0, 38.7, 31.8, 31.1(7), 31.1(3), 28.3(6), 28.3(0), 26.9(9), 26.9(1), 22.0, 18.6, 13.8; HRMS (ESI):  $m/z$   $[\text{M}-(\text{H}_2\text{O})+\text{H}]^+$  calcd. for  $[\text{C}_{24}\text{H}_{37}]^+$  325.28898, found 325.28806.

### 1-(3,5-Dimethylphenyl)-5-hexylundeca-3,4-dien-1-ol (3aq)

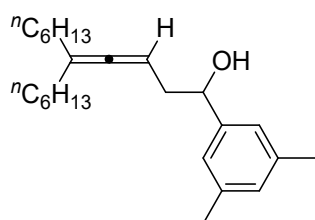

Colorless oil (99 mg, 93%). NMR data:  $^1\text{H}$  NMR (500 MHz,  $\text{DMSO-d}_6$ )  $\delta$  6.86 (s, 2H), 6.81 (s, 1H), 5.11 (d,  $J = 3.9$  Hz, 1H), 5.00-4.93 (m, 1H), 4.45 (dd,  $J = 10.4, 5.9$  Hz, 1H), 2.32-2.25 (m, 1H), 2.22 (s, 6H), 2.22-2.16 (m, 1H), 1.80-1.71 (m, 4H), 1.26-1.15 (m, 16H), 0.83 (t,  $J = 6.4$  Hz, 6H);  $^{13}\text{C}$  NMR (126 MHz,  $\text{DMSO-d}_6$ )  $\delta$  201.2, 145.2, 136.4, 127.9, 123.8, 102.6, 88.0, 72.8, 39.7, 31.8(7), 31.8(3), 31.1(7), 31.1(6), 28.3, 26.8, 22.1(4), 22.1(2), 20.9, 13.8; HRMS (APCI):  $m/z$   $[\text{M}-(\text{H}_2\text{O})+\text{H}]^+$  calcd. for  $[\text{C}_{25}\text{H}_{39}]^+$  339.30463, found 339.29694.

### 5-Hexyl-1-(naphthalen-2-yl)undeca-3,4-dien-1-ol (3ar)

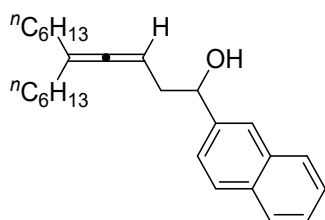

Colorless oil (45 mg, 40%). NMR data:  $^1\text{H}$  NMR (500 MHz,  $\text{DMSO-d}_6$ )  $\delta$  7.88-7.80 (m, 3H), 7.76 (s, 1H), 7.50-7.40 (m, 3H), 5.38 (d,  $J = 3.4$  Hz, 1H), 5.07-4.98 (m, 1H), 4.73 (dd,  $J = 10.4, 6.6$  Hz, 1H), 2.46-2.33 (m, 2H), 1.71-1.61 (m, 4H), 1.20-1.00 (m, 16H), 0.80 (t,  $J = 6.5$  Hz, 6H);  $^{13}\text{C}$  NMR (126 MHz,  $\text{DMSO-d}_6$ )  $\delta$  201.3, 142.7, 132.7, 132.3, 127.6, 127.4, 127.3, 125.8, 125.3, 124.7, 124.5, 102.8, 87.7, 72.7, 39.7, 31.8, 31.7, 31.0(6), 31.0(4), 28.2, 26.8(7), 26.8(6), 22.1(2), 22.1(1), 13.9; HRMS (ESI):  $m/z$   $[\text{M}-(\text{H}_2\text{O})+\text{H}]^+$  calcd. for  $[\text{C}_{27}\text{H}_{37}]^+$  361.28898, found 361.28711.

### 5-Hexyl-1-(thiophen-2-yl)undeca-3,4-dien-1-ol (3as)

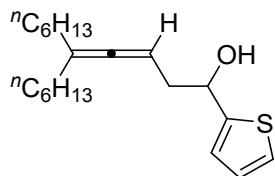

Colorless oil (42 mg, 42%). NMR data:  $^1\text{H}$  NMR (500 MHz,  $\text{DMSO-d}_6$ )  $\delta$  7.35 (d,  $J = 4.8$  Hz, 1H), 6.95-6.87 (m, 2H), 5.61 (d,  $J = 4.5$  Hz, 1H), 5.05-4.98 (m, 1H), 4.77 (dd,  $J = 11.1, 6.1$  Hz, 1H), 2.42-2.34 (m, 1H), 2.33-2.25 (m, 1H), 1.84-1.76 (m, 4H), 1.28-1.17 (m, 16H), 0.83 (t,  $J = 6.6$  Hz, 6H);  $^{13}\text{C}$  NMR (126 MHz,  $\text{DMSO-d}_6$ )  $\delta$  201.3, 149.7, 126.2, 123.9, 123.0, 103.0, 87.7, 68.7, 39.7, 31.8(5), 31.8(2), 31.1, 28.3(3), 28.3(2), 26.9, 22.1, 13.9; HRMS (ESI):  $m/z$   $[\text{M}-(\text{H}_2\text{O})+\text{H}]^+$  calcd. for  $[\text{C}_{21}\text{H}_{33}\text{S}]^+$  317.22975, found 317.22925.

### 1-(3-(5-Hexyl-1-hydroxyundeca-3,4-dien-1-yl)-1H-indol-1-yl)ethan-1-one (3at)

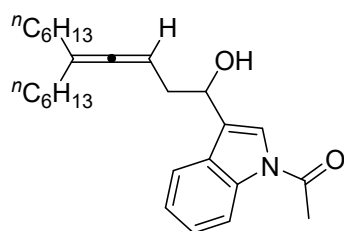

Colorless oil (65mg, 53%). NMR data:  $^1\text{H}$  NMR (500 MHz,  $\text{DMSO-d}_6$ )  $\delta$  8.30 (d,  $J = 8.2$  Hz, 1H), 7.70-7.59 (m, 2H), 7.28 (t,  $J = 7.6$  Hz, 1H), 7.21 (t,  $J = 7.4$  Hz, 1H), 5.31 (d,  $J = 4.4$  Hz, 1H), 5.16-5.04 (m, 1H), 4.84 (dd,  $J = 11.3, 6.2$  Hz, 1H), 2.60 (s, 3H), 2.56-2.42 (m, 2H), 1.72-1.63 (m, 4H), 1.21-1.09 (m, 16H), 0.81 (t,  $J = 6.9$  Hz, 6H);  $^{13}\text{C}$  NMR (126 MHz,  $\text{DMSO-d}_6$ )  $\delta$  201.1, 169.0, 135.5, 128.9, 125.4, 124.4, 123.1, 122.8, 119.9, 115.9, 102.9, 88.0, 66.3, 37.8, 31.8, 31.0, 28.3, 26.8(7), 26.8(4), 23.7, 22.0, 13.8; HRMS (ESI):  $m/z$   $[\text{M}-(\text{H}_2\text{O})+\text{H}]^+$  calcd. for  $[\text{C}_{27}\text{H}_{38}\text{NO}]^+$  392.29479, found 392.29315.

### 5-Hexyl-1-(pyridin-4-yl)undeca-3,4-dien-1-ol (3au)

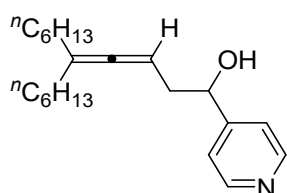

Colorless oil (48 mg, 49%). NMR data:  $^1\text{H}$  NMR (500 MHz,  $\text{DMSO-d}_6$ )  $\delta$  8.46 (s, 2H), 7.28 (d,  $J = 4.8$  Hz, 2H), 5.48 (d,  $J = 4.3$  Hz, 1H), 5.04-4.95 (m, 1H), 4.59 (dd,  $J = 10.5, 5.6$  Hz, 1H), 2.35-2.24 (m, 2H), 1.78-1.67 (m, 4H), 1.25-1.14 (m, 16H), 0.83 (t,  $J = 6.3$  Hz, 6H);  $^{13}\text{C}$  NMR (126 MHz,  $\text{DMSO-d}_6$ )  $\delta$  201.4, 153.7, 149.1, 121.3, 102.9, 87.1, 71.2, 39.1, 31.7, 31.0(9), 31.0(7), 28.2, 26.8(6), 26.8(2), 22.1, 13.9; HRMS (APCI):  $m/z$   $[\text{M}+\text{H}]^+$  calcd. for  $[\text{C}_{22}\text{H}_{36}\text{NO}]^+$ , 330.27914, found 330.27231.

### 7-Hexyl-1-phenyltrideca-1,5,6-trien-3-ol (3av)

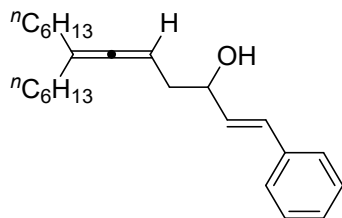

Colorless oil (66 mg, 62%). NMR data:  $^1\text{H}$  NMR (500 MHz,  $\text{DMSO-d}_6$ )  $\delta$  7.37 (d,  $J = 7.6$  Hz, 2H), 7.29 (t,  $J = 7.4$  Hz, 2H), 7.20 (t,  $J = 7.2$  Hz, 1H), 6.49 (d,  $J = 15.9$  Hz, 1H), 6.26 (dd,  $J = 15.9, 5.9$  Hz, 1H), 5.12-5.04 (m, 1H), 4.98 (d,  $J = 4.3$  Hz, 1H), 4.19-4.12 (m, 1H), 2.25-2.16 (m, 1H), 2.16-2.07 (m, 1H), 1.89-1.78 (m, 4H), 1.35-1.27 (m, 4H), 1.25-1.15 (m, 12H), 0.81 (t,  $J = 6.7$  Hz, 6H);  $^{13}\text{C}$  NMR (126 MHz,  $\text{DMSO-d}_6$ )  $\delta$  201.2, 136.8, 133.4, 128.4(7), 128.4(6), 127.1, 126.0, 102.9, 87.8, 71.0, 38.0, 31.9(7), 31.9(4), 31.1(3), 31.1(0), 28.3, 27.0, 22.1, 13.8; HRMS (ESI):  $m/z$   $[\text{M}-(\text{H}_2\text{O})+\text{H}]^+$  calcd. for  $[\text{C}_{25}\text{H}_{37}]^+$  337.28898, found 337.28821.

### 7-Hexyl-1-phenyltrideca-5,6-dien-1-yn-3-ol (3aw)

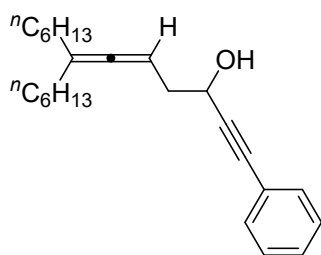

Colorless oil (76mg, 72%). NMR data:  $^1\text{H}$  NMR (500 MHz,  $\text{DMSO-d}_6$ )  $\delta$  7.50-7.20 (m, 5H), 5.56 (s, 1H), 5.21-5.05 (m, 1H), 4.44 (t,  $J = 6.6$  Hz, 1H), 2.40-2.20 (m, 2H), 1.94-1.78 (m, 4H), 1.40-1.29 (m, 4H), 1.24-1.12 (m, 12H), 0.80 (t,  $J = 6.3$  Hz, 3H), 0.79 (t,  $J = 6.3$  Hz, 3H);  $^{13}\text{C}$  NMR (126 MHz,  $\text{DMSO-d}_6$ )  $\delta$  201.4, 131.1, 128.5, 128.2, 122.5, 103.4, 92.0, 87.1, 83.2, 61.2, 38.3, 31.9(5), 31.9(0), 31.1(1), 31.1(0), 28.3(7), 28.3(5), 27.0, 22.1(1), 22.1(0), 13.8; HRMS (ESI):  $m/z$  calcd. for  $[\text{C}_{25}\text{H}_{36}\text{ONa}]^+$  375.26584, found 375.26474.

### 7-Hexyl-1-phenyltrideca-5,6-dien-3-ol (3ax)

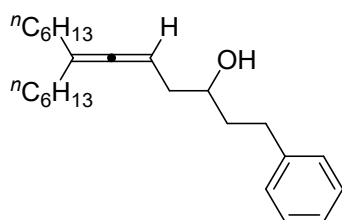

Colorless oil (96 mg, 90%). NMR data:  $^1\text{H}$  NMR (500 MHz,  $\text{DMSO-d}_6$ )  $\delta$  7.23 (t,  $J = 7.4$  Hz, 2H), 7.20-7.08 (m, 3H), 5.11-5.03 (m, 1H), 4.58 (d,  $J = 5.0$  Hz, 1H), 3.50-3.43 (m, 1H), 2.75-2.65 (m, 1H), 2.57-2.52 (m, 1H), 2.11-2.05 (m, 1H), 2.04-1.97 (m, 1H), 1.89-1.79 (m, 4H), 1.76-1.69 (m, 1H), 1.60-1.51 (m, 1H), 1.34-1.15 (m, 16H), 0.82 (t,  $J = 6.6$  Hz, 6H);  $^{13}\text{C}$  NMR (126 MHz,  $\text{DMSO-d}_6$ )  $\delta$  201.1, 142.3, 128.0, 125.4, 102.6, 88.2, 69.3, 38.0, 37.8, 32.0, 31.9, 31.4, 31.1(6), 31.1(5), 28.3, 27.0, 22.1, 13.8; HRMS (ESI):  $m/z$  calcd. for  $[\text{C}_{25}\text{H}_{40}\text{ONa}]^+$  379.29714, found 379.29529.

### 1-Cyclohexyl-5-hexylundeca-3,4-dien-1-ol (3ay)

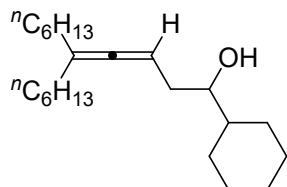

Colorless oil (67 mg, 67%). NMR data:  $^1\text{H}$  NMR (500 MHz,  $\text{DMSO-d}_6$ )  $\delta$  5.14-5.02 (m, 1H), 4.33 (d,  $J = 5.1$  Hz, 1H), 3.25-3.18 (m, 1H), 2.08-1.96 (m, 2H), 1.91-1.80 (m, 4H), 1.75-1.64 (m, 3H), 1.58 (d,  $J = 10.4$  Hz, 1H), 1.51 (d,  $J = 11.6$  Hz, 1H), 1.36-1.21 (m, 16H), 1.16-0.99 (m, 5H), 0.97-0.91 (m, 1H), 0.83 (t,  $J = 6.3$  Hz, 6H);  $^{13}\text{C}$  NMR (126 MHz,  $\text{DMSO-d}_6$ )  $\delta$  200.9, 102.4, 88.4, 74.0, 41.8, 34.7, 32.0, 31.9, 31.2(1), 31.2(0), 29.1, 28.3(8), 28.3(4), 27.0, 26.9, 26.2, 26.0, 25.8, 22.1, 13.8; HRMS (ESI):  $m/z$   $[\text{M}+\text{H}]^+$  calcd. for  $[\text{C}_{23}\text{H}_{43}\text{O}]^+$  335.33084, found 335.32932.

### 5-Methyl-1-phenylhexa-3,4-dien-1-ol (3be)

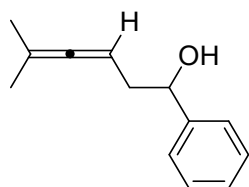

Colorless oil (45 mg, 80%). NMR data:  $^1\text{H}$  NMR (500 MHz,  $\text{CDCl}_3$ )  $\delta$  7.40-7.31 (m, 4H), 7.30-7.24 (m, 1H), 5.00-4.92 (m, 1H), 4.74 (dd,  $J = 6.4, 6.4$  Hz, 1H), 2.49-2.35 (m, 2H), 2.19 (br s, 1H), 1.65 (d,  $J = 2.0$  Hz, 3H), 1.63 (d,  $J = 2.0$  Hz, 3H);  $^{13}\text{C}$  NMR (126 MHz,  $\text{CDCl}_3$ )  $\delta$  203.2, 143.7, 128.2, 127.3, 125.9, 95.5, 84.6, 73.5, 39.2, 20.6, 20.4; HRMS (ESI):  $m/z$  calcd. for  $[\text{C}_{13}\text{H}_{16}\text{ONa}]^+$  211.10934, found 211.10927.

### 1-(4-Bromophenyl)-4-cyclohexylidenebut-3-en-1-ol (3ca)

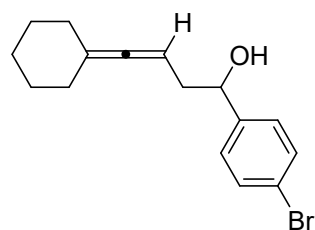

Colorless oil (73 mg, 79%). NMR data:  $^1\text{H}$  NMR (500 MHz,  $\text{DMSO-d}_6$ )  $\delta$  7.47 (d,  $J = 8.0$  Hz, 2H), 7.25 (d,  $J = 8.0$  Hz, 2H), 5.43 (d,  $J = 4.1$  Hz, 1H), 4.89-4.80 (m, 1H), 4.55 (dd,  $J = 10.5, 5.5$  Hz, 1H), 2.33-2.25 (m, 1H), 2.25-2.17 (m, 1H), 1.89-1.78 (m, 4H), 1.47-1.35 (m, 6H);  $^{13}\text{C}$  NMR (126 MHz,  $\text{DMSO-d}_6$ )  $\delta$  199.3, 144.6, 130.5, 128.4, 119.5, 100.9, 84.7, 71.8, 39.7, 30.8, 26.8(9), 26.8(7), 25.5; HRMS (ESI):  $m/z$   $[(\text{M}-\text{H}_2\text{O})+\text{H}]^+$  calcd. for  $[\text{C}_{16}\text{H}_{18}\text{Br}]^+$  289.05864, found 289.05780.

### 1-(4-Bromophenyl)-2,2-dimethylpenta-3,4-dien-1-ol (3da)

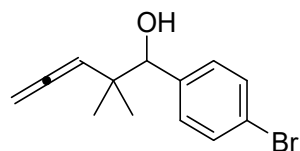

Colorless oil (49 mg, 61%). NMR data:<sup>1</sup>H NMR (500 MHz, DMSO-d<sub>6</sub>) δ 7.46 (d, *J* = 8.1 Hz, 2H), 7.22 (d, *J* = 8.1 Hz, 2H), 5.43 (d, *J* = 4.0 Hz, 1H), 5.25 (t, *J* = 6.6 Hz, 1H), 4.65 (d, *J* = 6.6 Hz, 2H), 4.29 (d, *J* = 3.8 Hz, 1H), 0.93 (s, 3H), 0.86 (s, 3H); <sup>13</sup>C NMR (126 MHz, DMSO-d<sub>6</sub>) δ 206.5, 142.2, 129.9, 129.8, 119.7, 97.3, 78.7, 76.4, 39.7, 24.4, 24.0; HRMS (ESI): *m/z* [(M-(H<sub>2</sub>O)+H)]<sup>+</sup> calcd. for [C<sub>13</sub>H<sub>14</sub>Br]<sup>+</sup> 249.02734, found 249.02701.

**(4-Bromophenyl)(1-(propa-1,2-dien-1-yl)cyclohexyl)methanol (3ea)**

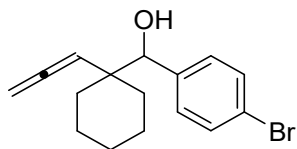

Colorless oil (57 mg, 62%). NMR data:<sup>1</sup>H NMR (500 MHz, DMSO-d<sub>6</sub>) δ 7.44 (d, *J* = 8.0 Hz, 2H), 7.19 (d, *J* = 8.0 Hz, 2H), 5.34 (d, *J* = 3.9 Hz, 1H), 4.86 (t, *J* = 6.5 Hz, 1H), 4.60 (dd, *J* = 10.1, 6.8 Hz, 1H), 4.53 (dd, *J* = 10.1, 6.7 Hz, 1H), 4.26 (d, *J* = 3.6 Hz, 1H), 1.63 (d, *J* = 11.3 Hz, 1H), 1.55-1.44 (m, 2H), 1.45-1.27 (m, 5H), 1.17-1.05 (m, 2H); <sup>13</sup>C NMR (126 MHz, DMSO-d<sub>6</sub>) δ 208.3, 141.8, 130.1, 129.6, 119.6, 93.7, 79.5, 75.7, 43.0, 32.2, 31.8, 25.7, 21.9, 21.6; HRMS (ESI): *m/z* [(M-(H<sub>2</sub>O)+H)]<sup>+</sup> calcd. for [C<sub>16</sub>H<sub>18</sub>Br]<sup>+</sup> 289.05864, found 289.05817.

**(4-Bromophenyl)(8-(propa-1,2-dien-1-yl)-1,4-dioxaspiro[4.5]decan-8-yl)methanol (3fa)**

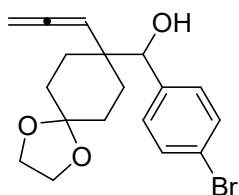

Colorless oil (77mg, 70%). NMR data:<sup>1</sup>H NMR (500 MHz, DMSO-d<sub>6</sub>) δ 7.44 (d, *J* = 8.0 Hz, 2H), 7.20 (d, *J* = 8.0 Hz, 2H), 5.40 (d, *J* = 4.1 Hz, 1H), 4.90 (t, *J* = 6.4 Hz, 1H), 4.64 (dd, *J* = 10.3, 6.8 Hz, 1H), 4.57 (dd, *J* = 10.3, 6.8 Hz, 1H), 4.28 (d, *J* = 3.5 Hz, 1H), 3.85-3.77 (m, 4H), 1.71-1.45 (m, 7H), 1.19-1.10 (m, 1H); <sup>13</sup>C NMR (126 MHz, DMSO-d<sub>6</sub>) δ 208.1, 141.8, 130.1, 129.7, 119.8, 108.1, 92.7, 79.1, 76.0, 63.5, 63.4, 42.3, 30.8, 30.5, 29.7, 29.2; HRMS (ESI): *m/z* [M-(H<sub>2</sub>O)+H]<sup>+</sup> calcd. for [C<sub>18</sub>H<sub>20</sub>BrO<sub>2</sub>]<sup>+</sup> 347.06412, found 347.06345.

**(4-Bromophenyl)(4-(propa-1,2-dien-1-yl)tetrahydro-2H-pyran-4-yl)methanol (3ga)**

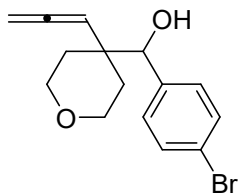

Colorless oil (71mg, 77%). NMR data:<sup>1</sup>H NMR (500 MHz, DMSO-d<sub>6</sub>) δ 7.46 (d, *J* = 8.0 Hz, 2H), 7.21 (d, *J* = 8.0 Hz, 2H), 5.47 (d, *J* = 4.2 Hz, 1H), 4.91 (t, *J* = 6.6 Hz, 1H), 4.65 (dd, *J* = 10.3, 6.8 Hz, 1H), 4.56 (dd, *J* = 10.3, 6.8 Hz, 1H), 4.29 (d, *J* = 4.1 Hz, 1H), 3.73-3.64 (m, 1H), 3.64-3.56 (m, 1H), 3.39-3.29 (m, 2H), 1.74-1.59 (m, 2H), 1.58-1.50 (m, 1H), 1.03-0.94 (m, 1H); <sup>13</sup>C NMR (126 MHz, DMSO-d<sub>6</sub>) δ 208.6, 141.2, 130.1, 129.7, 119.8, 92.3, 79.4, 76.3, 63.6, 63.1, 40.9, 32.8, 32.0; HRMS (ESI): *m/z* [M-(H<sub>2</sub>O)+H]<sup>+</sup> calcd. for [C<sub>15</sub>H<sub>16</sub>BrO]<sup>+</sup> 291.03790, found 291.03763.

### Tert-butyl 4-((4-bromophenyl)(hydroxy)methyl)-4-(propa-1,2-dien-1-yl)piperidine-1-carboxylate (3ha)

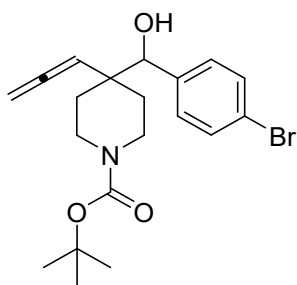

Colorless oil (64mg, 52%). NMR data:  $^1\text{H}$  NMR (500 MHz,  $\text{DMSO-d}_6$ )  $\delta$  7.45 (d,  $J = 8.0$  Hz, 2H), 7.21 (d,  $J = 8.0$  Hz, 2H), 5.49 (d,  $J = 3.9$  Hz, 1H), 4.90 (t,  $J = 6.3$  Hz, 1H), 4.67 (dd,  $J = 10.4, 6.8$  Hz, 1H), 4.59 (dd,  $J = 10.3, 6.7$  Hz, 1H), 4.28 (d,  $J = 3.4$  Hz, 1H), 3.86-3.64 (m, 2H), 2.87-2.60 (m, 2H), 1.60 (d,  $J = 11.7$  Hz, 1H), 1.55-1.43 (m, 2H), 1.36 (s, 9H), 1.08 (d,  $J = 12.6$  Hz, 1H);  $^{13}\text{C}$  NMR (126 MHz,  $\text{DMSO-d}_6$ )  $\delta$  208.5, 153.8, 141.2, 130.1, 129.7, 119.9, 91.9, 78.9, 78.3, 76.4, 41.7, 39.7, 31.6, 28.0; HRMS (ESI):  $m/z$  [(M-BOC)+H] $^+$  calcd. for  $[\text{C}_{15}\text{H}_{19}\text{BrNO}]^+$  308.06445, found 308.06369.

### 1-(4-Bromophenyl)-7-phenylhepta-3,4-dien-1-ol (3ia)

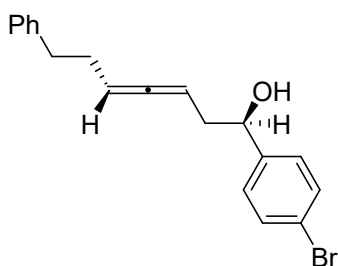

Colorless oil (62 mg, 61%). NMR data:  $^1\text{H}$  NMR (500 MHz,  $\text{DMSO-d}_6$ )  $\delta$  7.48 (d,  $J = 8.1$  Hz, 2H), 7.28-7.21 (m, 4H), 7.18-7.10 (m, 3H), 5.38 (d,  $J = 4.1$  Hz, 1H), 5.09-4.98 (m, 2H), 4.51 (dd,  $J = 10.7, 6.0$  Hz, 1H), 2.53-2.49 (m, 2H), 2.33-2.24 (m, 1H), 2.20-2.12 (m, 1H), 2.12-2.00 (m, 2H);  $^{13}\text{C}$  NMR (126 MHz,  $\text{DMSO-d}_6$ )  $\delta$  204.4, 144.7, 141.4, 130.7, 128.3(7), 128.3(3), 128.1, 125.7, 119.7, 89.7, 87.6, 71.7, 39.7, 34.4, 29.8; HRMS (APCI):  $m/z$  [M-(H<sub>2</sub>O)+H] $^+$  calcd. For  $[\text{C}_{19}\text{H}_{18}\text{Br}]^+$  325.05864, found 325.05051.

### 1-(4-Bromophenyl)-3-methylnona-3,4-dien-1-ol (3ja)

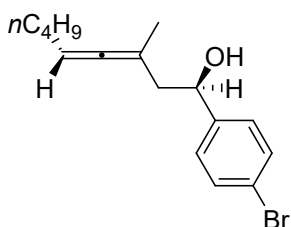

Colorless oil (58 mg, 63%). NMR data:  $^1\text{H}$  NMR (500 MHz,  $\text{DMSO-d}_6$ )  $\delta$  7.47 (d,  $J = 8.0$  Hz, 2H), 7.25 (d,  $J = 8.0$  Hz, 2H), 5.28 (d,  $J = 4.1$  Hz, 1H), 4.88-4.81 (m, 1H), 4.61 (dd,  $J = 11.1, 6.4$  Hz, 1H), 2.31 (dd,  $J = 13.4, 6.5$  Hz, 1H), 2.16 (dd,  $J = 13.2, 7.5$  Hz, 1H), 1.71-1.52 (m, 5H), 1.23-1.16 (m, 2H), 1.14-1.07 (m, 2H), 0.81 (t,  $J = 7.1$  Hz, 3H);  $^{13}\text{C}$  NMR (126 MHz,  $\text{DMSO-d}_6$ )  $\delta$  202.4, 145.0, 130.6, 128.3, 119.6, 95.1, 89.1, 70.5, 44.2, 30.7, 28.1, 21.5, 19.0, 13.7; HRMS (ESI):  $m/z$  [M-(H<sub>2</sub>O)+H] $^+$  calcd. for  $[\text{C}_{16}\text{H}_{20}\text{Br}]^+$  291.07429, found 291.07391.





### 3.3 Procedure for the synthesis of homoallenyl tertiary alcohols (5aa-5ad and 5af-5ah)

Step 1: To a stirred solution of 2-pinacolboryl 1,3-butadiene **1a** (70 mg, 0.20 mmol, 1.0 equiv.) in THF (1.0 mL) under Ar at  $-78\text{ }^{\circ}\text{C}$  was added *n*BuLi (0.16 mL, 1.6 M, 0.25 mmol, 1.25 equiv.) dropwise. The solution was then stirred for 20 min at  $-78\text{ }^{\circ}\text{C}$ , at which point TFAA (34  $\mu\text{L}$ , 0.24 mmol, 1.2 equiv.) was added dropwise. The reaction mixture was stirred at  $-78\text{ }^{\circ}\text{C}$  for 1 hour. Subsequently, the solvent was carefully removed in vacuo and the resulting residue was taken up in dry toluene (2 mL). After a sequential addition of ketone **4** (0.6 mmol, 3.0 equiv.), DIPEA (35  $\mu\text{L}$ , 0.20 mmol, 1.0 equiv.) and TFAA (56  $\mu\text{L}$ , 0.4 mmol, 2.0 equiv.) at  $0\text{ }^{\circ}\text{C}$  dropwise, the final reaction mixture was stirred at  $0\text{ }^{\circ}\text{C}$  for 30 min, then allowed to warm to RT for 14 hours. After completion of reaction, the reaction was quenched with sat.  $\text{NaHCO}_3$  (aq.) and extracted with EtOAc (3x10 mL). The combined organic layers were washed with brine, dried over  $\text{MgSO}_4$ , filtered, concentrated in vacuo and used for deprotection of partially formed **5-TFA** directly.

Step 2: The crude residue was dissolved in MeOH (5 mL),  $\text{NaHCO}_3$  (84 mg, 1.0 mmol, 5.0 equiv.) was added into the solution in one-pot. The mixture was stirred at r.t. for 12 hours. After completion of deprotection reaction, the reaction was quenched with sat.  $\text{NaCl}$  (aq.) and extracted with EtOAc (3x10 mL). The combined organic phases were dried over  $\text{MgSO}_4$ , filtered and concentrated under reduced pressure. The crude material was purified by flash chromatography using EtOAc/PE (1:200-1:50) as eluent to afford **5 (5aa,5ab and 5af)**. **5ac** and **5ad** could not be purified by flash chromatography.

#### Analytical data

##### 6-Hexyl-2-phenyldodeca-4,5-dien-2-ol (5aa)

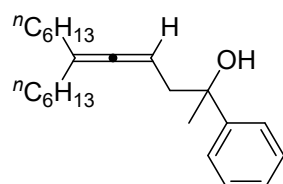

Colorless oil (34 mg, 49%). NMR data:  $^1\text{H}$  NMR (500 MHz,  $\text{DMSO-d}_6$ )  $\delta$  7.39 (d,  $J = 7.3$  Hz, 2H), 7.25 (t,  $J = 7.5$  Hz, 2H), 7.15 (t,  $J = 7.3$  Hz, 2H), 4.95 (s, 1H), 4.94-4.88 (m, 1H), 2.36-2.25 (m, 2H), 1.82-1.74 (m, 2H), 1.74-1.66 (m, 2H), 1.43 (s, 3H), 1.27-1.12 (m, 16H), 0.84 (t,  $J = 6.8$  Hz, 3H), 0.83 (t,  $J = 7.0$  Hz, 3H);  $^{13}\text{C}$  NMR (126 MHz,  $\text{DMSO-d}_6$ )  $\delta$  201.6, 148.6, 127.4, 125.7, 125.0, 102.1, 87.3, 72.7, 44.8, 31.8, 31.1, 31.0, 29.1, 28.2, 26.9, 26.8, 22.0, 13.8; HRMS (ESI):  $m/z$  calcd. for  $[\text{C}_{24}\text{H}_{38}\text{ONa}]^+$  365.28149, found 365.28043.

##### 6-Hexyl-2-(p-tolyl)dodeca-4,5-dien-2-ol (5ab)

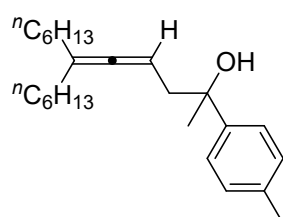

Colorless oil (38 mg, 53%). NMR data:  $^1\text{H}$  NMR (500 MHz,  $\text{DMSO-d}_6$ )  $\delta$  7.26 (d,  $J = 8.0$  Hz, 2H), 7.05 (d,  $J = 8.0$  Hz, 2H), 4.95-4.89 (m, 1H), 4.88 (s, 1H), 2.30 (d,  $J = 7.4$  Hz, 2H), 2.24 (s, 3H), 1.81-1.75 (m, 2H), 1.73-1.66 (m, 2H), 1.40 (s, 3H), 1.25-1.13 (m, 16H), 0.84 (t,  $J = 7.0$  Hz, 3H), 0.83 (t,  $J = 7.0$  Hz, 3H);  $^{13}\text{C}$  NMR (126 MHz,  $\text{DMSO-d}_6$ )  $\delta$  201.6, 145.7, 134.5, 128.0, 124.9, 102.1, 87.4, 72.6, 44.9, 31.8(7), 31.8(4), 31.1, 31.0, 29.2, 28.3(3), 28.3(0), 26.9, 26.8, 22.0(9), 22.0(7), 20.5, 13.8; HRMS (ESI):  $m/z$  calcd. for  $[\text{C}_{25}\text{H}_{40}\text{ONa}]^+$  379.29714, found 379.29587.

### 6-Hexyl-2-(naphthalen-2-yl)dodeca-4,5-dien-2-ol (5af)

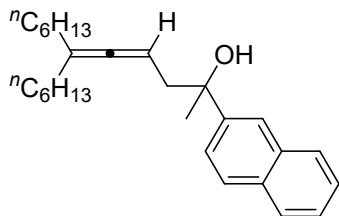

Colorless oil (49mg, 62%). NMR data:  $^1\text{H}$  NMR (500 MHz,  $\text{DMSO-d}_6$ )  $\delta$  7.88 (s, 1H), 7.84 (d,  $J = 7.7$  Hz, 1H), 7.82 (d,  $J = 7.6$  Hz, 1H), 7.79 (d,  $J = 8.6$  Hz, 1H), 7.55 (dd,  $J = 8.6, 1.6$  Hz, 1H), 7.48-7.38 (m, 2H), 5.14 (s, 1H), 5.03-4.94 (m, 1H), 2.48-2.39 (m, 2H), 1.75-1.67 (m, 2H), 1.60-1.54 (m, 2H), 1.53 (s, 3H), 1.22-1.10 (m, 10H), 1.01-0.92 (m, 6H), 0.82 (t,  $J = 7.1$  Hz, 3H), 0.77 (t,  $J = 7.3$  Hz, 3H);  $^{13}\text{C}$  NMR (126 MHz,  $\text{DMSO-d}_6$ )  $\delta$  201.6, 146.1, 132.6, 131.6, 127.8, 127.1, 126.9, 125.6, 125.2, 124.3, 123.2, 102.2, 87.3, 73.0, 44.7, 31.8, 31.7, 31.1, 30.9, 29.3, 28.2(8), 28.2(4), 26.9, 26.7, 22.0, 13.9, 13.8; HRMS (ESI):  $m/z$   $[\text{M}-(\text{H}_2\text{O})+\text{H}]^+$  calcd. for  $[\text{C}_{28}\text{H}_{39}]^+$  375.30463 found 375.30341.

### (3-(6-Hexyl-2-hydroxydodeca-4,5-dien-2-yl)-1H-indol-1-yl)(phenyl)methanone (5ag)

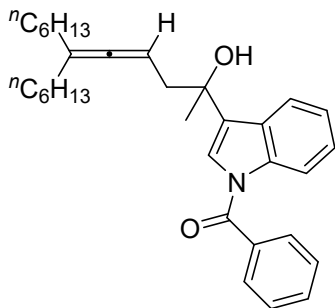

Yellow oil (35 mg, 36%). NMR data:  $^1\text{H}$  NMR (500 MHz,  $\text{CDCl}_3$ )  $\delta$  8.42 (d,  $J = 8.1$  Hz, 1H), 7.78 (d,  $J = 7.8$  Hz, 1H), 7.73 (d,  $J = 7.5$  Hz, 2H), 7.60 (dd,  $J = 7.2, 7.2$  Hz, 1H), 7.53 (dd,  $J = 7.4, 7.4$  Hz, 2H), 7.38 (dd,  $J = 7.4, 7.4$  Hz, 1H), 7.32 (dd,  $J = 7.4, 7.4$  Hz, 1H), 7.22 (s, 1H), 4.96-4.88 (m, 1H), 2.76 (dd,  $J = 13.9, 6.8$  Hz, 1H), 2.54 (dd,  $J = 13.9, 8.3$  Hz, 1H), 2.35 (br s, 1H), 1.90-1.77 (m, 4H), 1.66 (s, 3H), 1.30-1.20 (m, 16H), 0.89-0.83 (m, 6H);  $^{13}\text{C}$  NMR (126 MHz,  $\text{CDCl}_3$ )  $\delta$  203.2, 168.5, 137.1, 134.6, 131.8, 129.1, 128.7, 128.6, 128.4, 124.8, 123.6(9), 123.6(7), 120.8, 116.6, 104.4, 85.7, 71.9, 42.8, 32.5, 32.4, 31.6, 28.9, 28.4, 27.6, 27.5, 22.6, 14.0; HRMS (ESI):  $m/z$  calcd. for  $[\text{C}_{33}\text{H}_{43}\text{NO}_2\text{Na}]^+$  508.31860, found 508.31760.

### 7-Hexyl-3-methyl-1-phenyltrideca-5,6-dien-3-ol (5ah)

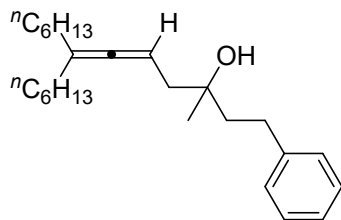

Colorless oil (42mg, 57%). NMR data:  $^1\text{H}$  NMR (500 MHz,  $\text{CDCl}_3$ )  $\delta$  7.26-7.21 (m, 2H), 7.21-7.10 (m, 3H), 5.15-4.98 (m, 1H), 2.74-2.60 (m, 2H), 2.17 (d,  $J = 5.9$  Hz, 2H), 1.97-1.84 (m, 4H), 1.83-1.72 (m, 2H), 1.58 (brs, 1H), 1.39-1.33 (m, 4H), 1.28-1.21 (m, 15H), 0.84 (t,  $J = 6.4$  Hz, 6H);  $^{13}\text{C}$  NMR (126 MHz,  $\text{CDCl}_3$ )  $\delta$  202.9, 142.5, 128.3, 128.2, 125.6, 104.0, 86.1, 72.3, 43.4, 42.4, 32.6, 31.7, 30.3, 29.0, 27.7, 26.5, 22.6, 14.0; HRMS (ESI):  $m/z$   $[\text{M}+\text{H}]^+$  calcd. for  $[\text{C}_{26}\text{H}_{43}\text{O}]^+$ , 371.3314 found 371.3314.

#### 1-(4-Hexyldeca-2,3-dien-1-yl)cyclohexan-1-ol (5ai)

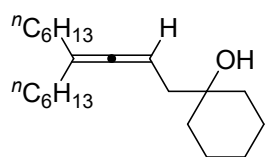

Colorless oil (34mg, 53%). NMR data:  $^1\text{H}$  NMR (500 MHz,  $\text{CDCl}_3$ )  $\delta$  5.13-5.03 (m, 1H), 2.12 (d,  $J = 7.7$  Hz, 2H), 1.91 (t,  $J = 7.0$  Hz, 4H), 1.66-1.59 (m, 2H), 1.57-1.52 (m, 4H), 1.51-1.44 (m, 4H), 1.44-1.34 (m, 5H), 1.33-1.26 (m, 12H), 0.88 (t,  $J = 6.4$  Hz, 6H);  $^{13}\text{C}$  NMR (126 MHz,  $\text{CDCl}_3$ )  $\delta$  202.8, 103.6, 85.9, 71.2, 42.6, 37.2, 32.6, 31.7, 29.0, 27.7, 25.8, 22.6, 22.2, 14.0; HRMS (ESI):  $m/z$   $[\text{M}+\text{H}]^+$  calcd. for  $[\text{C}_{22}\text{H}_{41}\text{O}]^+$ , 321.3157 found 321.3161.

#### 1-(4-(4-Hexyldeca-2,3-dien-1-yl)-4-hydroxypiperidin-1-yl)ethan-1-one (5aj)

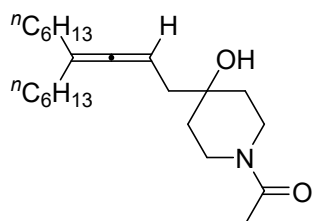

Colorless oil (51 mg, 70%). NMR data:  $^1\text{H}$  NMR (500 MHz,  $\text{CDCl}_3$ )  $\delta$  5.09-5.01 (m, 1H), 4.45-4.15 (m, 1H), 3.75-3.51 (m, 1H), 3.45 (t,  $J = 11.6$  Hz, 1H), 3.04 (t,  $J = 11.6$  Hz, 1H), 2.13 (d,  $J = 7.7$  Hz, 2H), 2.08 (s, 3H), 1.92 (t,  $J = 7.6$  Hz, 2H), 1.91 (t,  $J = 7.6$  Hz, 2H), 1.84 (br s, 1H), 1.68-1.58 (m, 2H), 1.57-1.47 (m, 2H), 1.43-1.34 (m, 4H), 1.33-1.22 (m, 12H), 0.87 (t,  $J = 6.6$  Hz, 6H);  $^{13}\text{C}$  NMR (126 MHz,  $\text{CDCl}_3$ )  $\delta$  203.1, 168.7, 104.2, 84.8, 69.2, 43.3, 42.5, 37.6, 37.0, 36.3, 32.5, 31.6, 28.9, 27.6, 22.5, 21.3, 14.0; HRMS (ESI):  $m/z$  calcd. for  $[\text{C}_{23}\text{H}_{41}\text{NO}_2\text{Na}]^+$  386.30295, found 386.30161.

### 3.4 Procedure for the synthesis of homoallenyl tertiary alcohols **5ae**

Step 1: To a stirred solution of 2-pinacolboryl 1,3-butadiene **1a** (70 mg, 0.20 mmol, 1.0 equiv.) in THF (1.0 mL) under Ar at  $-78\text{ }^{\circ}\text{C}$  was added *n*BuLi (0.16 mL, 1.6 M, 0.25 mmol, 1.25 equiv.) dropwise. The solution was then stirred for 20 min at  $-78\text{ }^{\circ}\text{C}$ , at which point TFAA (34  $\mu\text{L}$ , 0.24 mmol, 1.2 equiv.) was added dropwise. The reaction mixture was stirred at  $-78\text{ }^{\circ}\text{C}$  for 1 hour. Subsequently, the solvent was carefully removed in vacuo and the resulting residue was taken up in dry Toluene (1.5 mL). After a sequential addition of ketone **4e** (119 mg 0.6 mmol 3.0 equiv.) solution in toluene (0.5 mL) and TFAA (56  $\mu\text{L}$ , 0.4 mmol, 2.0 equiv.) at  $0\text{ }^{\circ}\text{C}$  dropwise, the final reaction mixture was stirred at  $0\text{ }^{\circ}\text{C}$  for 24 hours. After completion of reaction, the reaction was quenched with sat.  $\text{NaHCO}_3$  (aq.) and extracted with EtOAc (3x10 mL). The combined organic layers were washed with brine, dried over  $\text{MgSO}_4$ , filtered, concentrated in vacuo and used for deprotection of partially formed **5ae-TFA** directly.

Step 2: The crude residue was dissolved in MeOH (5 mL),  $\text{NaHCO}_3$  (84 mg, 1.0 mmol, 5.0 equiv.) was added into the solution in one-pot. The mixture was stirred at r.t. for 12 hours. After completion of deprotection reaction, the reaction was quenched with sat.  $\text{NaCl}$  (aq.) and extracted with EtOAc (3 x 10 mL). The combined organic phases were dried over  $\text{MgSO}_4$ , filtered and concentrated under reduced pressure. The crude material was partly purified by flash chromatography using EtOAc/PE (1:200-1:50) as eluent to afford **5ae** accompanying ketone **4e** with an NMR yield of 52%.

### 3.5 Procedure for the synthesis of acetyl-protected derivatives (**5ac-Ac**, **5ad-Ac** and **5ae-Ac**)

Due to the same polarity of **5ac-5ae** and their corresponding ketones (**4c-4e**) on analytical thin-layer chromatography (TLC) in homoallylboration reactions, the purification of **5ac-5ae** was not feasible by regular flash chromatography. Therefore, we decided to further transform **5ac-5ae** to their acetyl-protected derivatives (**5ac-Ac**, **5ad-Ac** and **5ae-Ac**) and implement their data characterization and analysis.

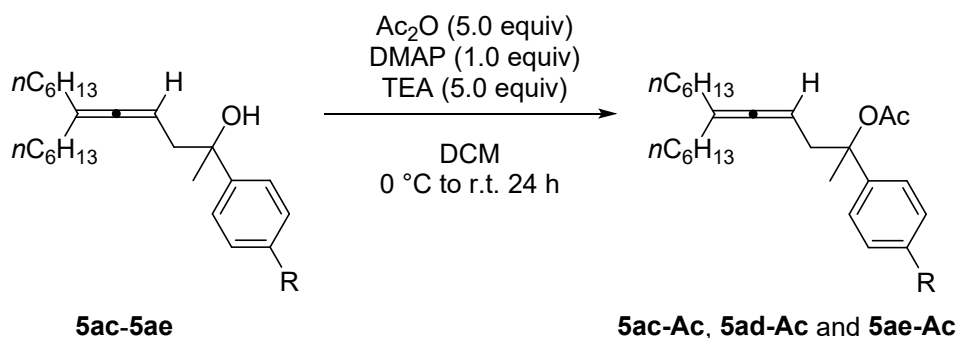

The acetyl-protected homoallylic alcohols were synthesized according to reported procedures by Wang and co-workers.<sup>[4]</sup> Representative procedure: A flask was charged with **5ac** (~40 mg, 0.1 mmol, 1.0 equiv.) accompanied with *p*-chloroacetophenone **4c**, DMAP (12.2 mg, 0.1 mmol, 1.0 equiv.) and DCM (1.5 ml) then cooled to 0 °C. Subsequently, triethylamine (70  $\mu$ L, 0.5 mmol, 5.0 equiv.) was added dropwise to the solution and stirred for 5 min. Then, Ac<sub>2</sub>O (47  $\mu$ L, 0.5 mmol, 5.0 equiv.) was added dropwise and the resulted solution was stirred for 24 hours at room temperature. The reaction was then quenched with saturated NH<sub>4</sub>Cl solution and extracted with EtOAc and the organic phase was dried over anhydrous MgSO<sub>4</sub>. After filtration the solvent was removed in vacuo. The crude material was purified by flash chromatography using EtOAc/PE (1:200-1:50) as eluent to afford pure **5ac-Ac**.

#### Analytical Data:

##### Methyl 4-(2-acetoxy-6-hexyldodeca-4,5-dien-2-yl)benzoate (**5ac-Ac**)

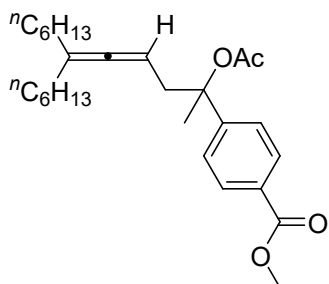

Colorless oil (33.7mg, 76%). NMR data: <sup>1</sup>H NMR (500 MHz, CDCl<sub>3</sub>)  $\delta$  7.99 (d, *J* = 8.3 Hz, 2H), 7.38 (d, *J* = 8.3 Hz, 2H), 4.87-4.76 (m, 1H), 3.90 (s, 3H), 2.65 (ABqd, *J* = 14.0, 7.3 Hz, 2H), 2.07 (s, 3H), 1.87 (s, 3H), 1.85-1.78 (m, 4H), 1.28-1.19 (m, 16H), 0.88 (t, *J* = 6.6 Hz, 6H); <sup>13</sup>C NMR (126 MHz, CDCl<sub>3</sub>)  $\delta$  202.9, 169.4, 166.7, 149.7, 129.5, 128.7, 124.8, 104.1, 85.2, 83.1, 51.9, 43.3, 32.4(8), 32.4(5), 31.7, 29.0, 28.9, 27.5(8), 27.5(5), 24.3, 22.6, 22.0, 14.0; HRMS (ESI): *m/z* [M-OAc]<sup>+</sup> calcd. for [C<sub>26</sub>H<sub>39</sub>O<sub>2</sub>]<sup>+</sup> 383.29446 found 383.29214.

##### 2-(4-Chlorophenyl)-6-hexyldodeca-4,5-dien-2-yl acetate (**5ad-Ac**)

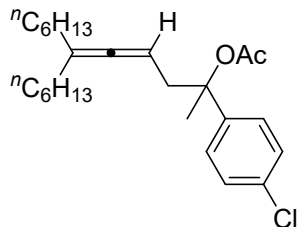

Colorless oil (24mg, 57%). NMR data:  $^1\text{H}$  NMR (500 MHz,  $\text{CDCl}_3$ )  $\delta$  7.33-7.28 (m, 2H), 7.28-7.25 (m, 2H), 4.87-4.80 (m, 1H), 2.65 (ABqd,  $J = 13.9, 7.4$  Hz, 2H), 2.07 (s, 3H), 1.86 (s, 3H), 1.88-1.80 (m, 4H), 1.32-1.26 (m, 16H), 0.90 (t,  $J = 6.9$  Hz, 6H);  $^{13}\text{C}$  NMR (126 MHz,  $\text{CDCl}_3$ )  $\delta$  202.9, 169.5, 143.0, 132.7, 128.2, 126.3, 104.1, 85.3, 83.0, 43.4, 32.5, 32.4, 31.7, 29.0(3), 29.0(2), 27.6, 27.5, 24.3, 22.6, 22.1, 14.0; HRMS (ESI):  $m/z$   $[\text{M-OAc}]^+$  calcd. for  $[\text{C}_{24}\text{H}_{36}\text{Cl}]^+$  359.25001 found 359.24854.

### 2-(4-Bromophenyl)-6-hexyldodeca-4,5-dien-2-yl acetate (5ae-Ac)

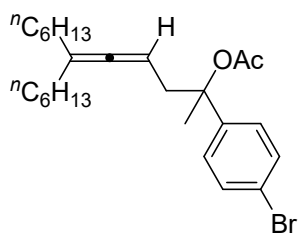

Colorless oil (29mg, 62%). NMR data:  $^1\text{H}$  NMR (500 MHz,  $\text{CDCl}_3$ )  $\delta$  7.43 (d,  $J = 7.5$  Hz, 2H), 7.19 (d,  $J = 7.5$  Hz, 2H), 4.88-4.76 (m, 1H), 2.62 (ABqd,  $J = 13.9, 7.7$  Hz, 2H), 2.04 (s, 3H), 1.83 (s, 3H), 1.84-1.79 (m, 4H), 1.36-1.18 (m, 16H), 0.88 (t,  $J = 6.4$  Hz, 6H);  $^{13}\text{C}$  NMR (126 MHz,  $\text{CDCl}_3$ )  $\delta$  202.9, 169.4, 143.6, 131.2, 126.6, 120.8, 104.1, 85.3, 83.0, 43.3, 32.4(9), 32.4(6), 31.7, 29.0(2), 29.0(1), 27.6, 27.5, 24.3, 22.6, 22.1, 14.0; HRMS (ESI):  $m/z$  calcd. for  $[\text{C}_{26}\text{H}_{39}\text{BrO}_2\text{Na}]^+$  485.20256, found 485.20050.

### 3.6 Gold-catalyzed cycloisomerization of homoallenyl alcohol **3ia** to **3ia-dihydropyran**

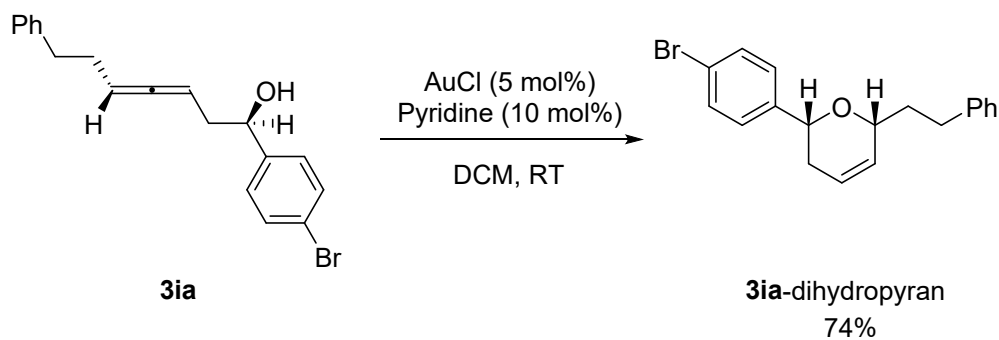

**3ia-dihydropyran** was synthesized according to reported procedures by Krause and co-workers.<sup>[5]</sup> To a solution of the homoallenyl alcohol **3ia** (34 mg, 0.1 mmol, 1.0 equiv.) in 1 mL of dry solvent under argon was added the catalyst AuCl (1.2 mg, 0.005 mmol, 5 mol%) and pyridine (1  $\mu$ L, 0.01 mmol, 10 mol%). The reaction mixture was stirred at room temperature and monitored by TLC. After completion, the mixture was filtered through celite to remove trace solid, then solvent was removed in vacuo. Product **3ia-dihydropyran** was purified by flash column chromatography on silica gel with EtOAc/PE (1:100-1:50) as eluent.

#### Analytical data:

#### *cis*-2-(4-Bromophenyl)-6-phenethyl-3,6-dihydro-2H-pyran (**3ia-dihydropyran**)

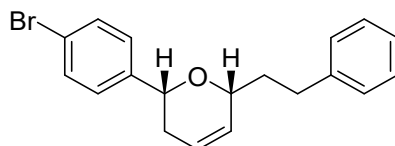

Colorless oil (28 mg, 74% yield). NMR data: <sup>1</sup>H NMR (500 MHz, CDCl<sub>3</sub>)  $\delta$  7.48 (d,  $J$  = 8.2 Hz, 2H), 7.32-7.26 (m, 4H), 7.25-7.16 (m, 3H), 5.95-5.87 (m, 1H), 5.73 (d,  $J$  = 10.5 Hz, 1H), 4.57 (t,  $J$  = 6.8 Hz, 1H), 4.40-4.30 (m, 1H), 2.90-2.75 (m, 2H), 2.29-2.20 (m, 2H), 1.99-1.90 (m, 2H); <sup>13</sup>C NMR (126 MHz, CDCl<sub>3</sub>)  $\delta$  142.2, 142.0, 131.3, 130.2, 128.5, 128.2, 127.3, 125.6, 124.6, 120.9, 74.7, 74.5, 37.0, 33.1, 31.2; HRMS (ESI):  $m/z$  [M+H]<sup>+</sup> calcd. for [C<sub>19</sub>H<sub>20</sub>BrO]<sup>+</sup> 343.06920, found 343.06839.



### 3.7 Determination of the stereochemistry of **3ia**-dihydropyran using a NOESY spectrum

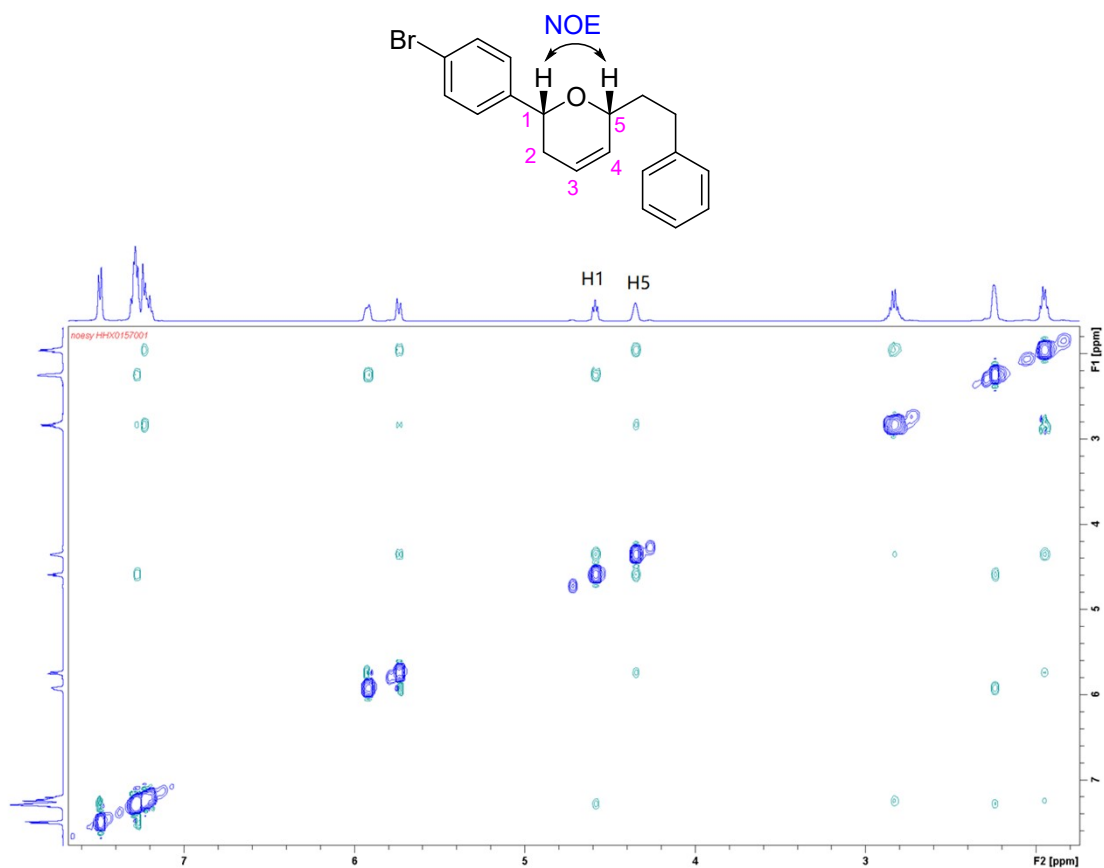

**Figure S1.** Observed NOESY effect between the C1 proton and C5 proton

The NOESY experiment (Figure S1) indicated a through space NOE effect between C1-H and C5-H. This indicates that C1-H and C5-H are close in space. Therefore, the relative configuration of **3ia**-dihydropyran is *cis*.

### 3.8 Procedure for the synthesis of 1a-BOH

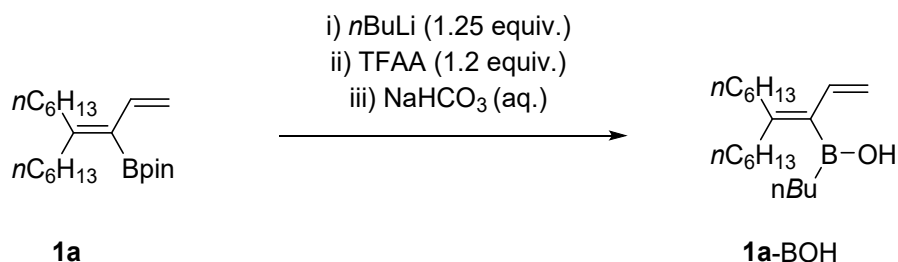

To a stirred solution of 2-pinacolateboryl 1,3-butadiene **1a** (104 mg, 0.30 mmol, 1.0 equiv.) in THF (1.5 mL) under Ar at  $-78\text{ }^{\circ}\text{C}$  was added *n*BuLi (0.24 mL, 1.6 M, 0.375 mmol, 1.25 equiv.) dropwise. The solution was then stirred for 20 min at  $-78\text{ }^{\circ}\text{C}$ , at which point TFAA (50  $\mu\text{L}$ , 0.36 mmol, 1.2 equiv.) was added dropwise. The reaction mixture was stirred at  $-78\text{ }^{\circ}\text{C}$  for 45 min and allowed to warm to  $0\text{ }^{\circ}\text{C}$  for 30 min. Then, the reaction was quenched with sat. NaHCO<sub>3</sub> (aq.) at  $0\text{ }^{\circ}\text{C}$  and extracted with EtOAc (3 x 5 mL). The combined organic layers were washed with brine, dried over MgSO<sub>4</sub>, filtered, concentrated in vacuo. No further purification was performed since the boronic acid product **1a-BOH** decomposed during flash chromatography.

#### Analytical data:

#### Butyl(4-hexyldeca-1,3-dien-3-yl)(hydroxy)borane (**1a-BOH**)

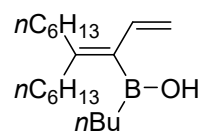

NMR data: <sup>1</sup>H NMR (500 MHz, THF-d<sub>8</sub>)  $\delta$  8.45 (s, 1H), 7.66 (dd,  $J = 17.6\text{ Hz}, 10.6\text{ Hz}$ , 1H), 4.87 (d,  $J = 10.7\text{ Hz}$ , 1H), 4.80 (d,  $J = 17.8\text{ Hz}$ , 1H), 2.14 (t,  $J = 7.3\text{ Hz}$ , 2H), 1.97 (t,  $J = 7.4\text{ Hz}$ , 2H), 1.42-1.28 (m, 20H), 0.92 (t,  $J = 7.7\text{ Hz}$ , 2H), 0.90-0.85 (m, 9H); <sup>11</sup>B NMR (128 MHz, THF-d<sub>8</sub>)  $\delta$  52.

HRMS (ESI):  $m/z$  calcd. for [C<sub>20</sub>H<sub>39</sub>BONa]<sup>+</sup> 329.2991, found 329.2982.

### 3.9 Procedure for the synthesis of 2,3-dimethylbutane-2,3-diyl bis(2,2,2-trifluoroacetate) **6**

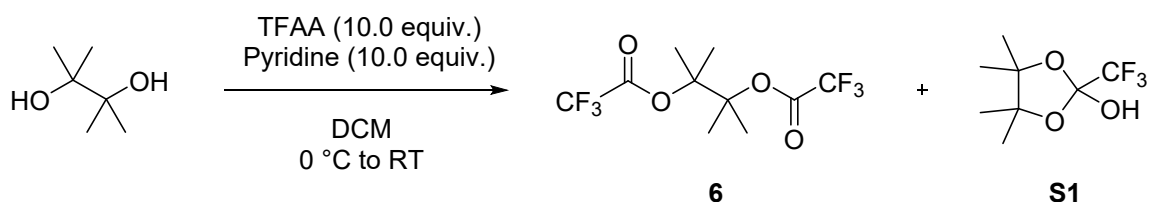

The bis-TFA protected pinacol **6** accompanying with **S1**<sup>[6]</sup> were synthesized according to reported procedures by Buddrus and co-workers.<sup>[7]</sup>

To a stirred solution of pinacol (236 mg, 2 mmol, 1.0 equiv.) in DCM (2 mL) under Ar at 0 °C was added pyridine (1.6 mL, 20 mmol, 10 equiv.) and trifluoroacetic anhydride (2.8 mL, 20 mmol, 10 equiv.) dropwise. Then, the reaction solution was warmed to room temperature and stirred for 24 hours. The reaction was quenched with water at 0 °C and extracted with DCM (3 x 5 mL). The combined organic layers were washed with brine, dried over MgSO<sub>4</sub>, filtered and concentrated in vacuo. No further purification was performed since **6** decomposed during flash chromatography.

#### Analytical data:

#### 2,3-dimethylbutane-2,3-diyl bis(2,2,2-trifluoroacetate) (**6**)

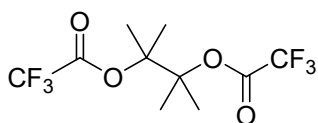

NMR data: <sup>1</sup>H NMR (500 MHz, THF-d<sub>8</sub>) δ 1.70 (s, 12H); <sup>13</sup>C NMR (126 MHz, THF-d<sub>8</sub>) δ 156.0 (q, *J* = 41.5 Hz), 115.4 (q, *J* = 286.4 Hz), 91.5, 20.1; HRMS (ESI): *m/z* [M+H]<sup>+</sup> calcd. for [C<sub>10</sub>H<sub>13</sub>F<sub>6</sub>O<sub>4</sub>]<sup>+</sup> 311.0718, found 311.0721.

#### 4,4,5,5-tetramethyl-2-(trifluoromethyl)-1,3-dioxolan-2-ol (**S1**)

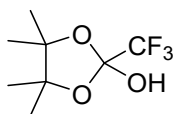

NMR data: <sup>1</sup>H NMR (500 MHz, THF-d<sub>8</sub>) δ 1.36 (s, 6H), 1.22 (s, 6H); <sup>13</sup>C NMR (126 MHz, THF-d<sub>8</sub>) δ 121.6 (q, *J* = 287.8 Hz), 112.0 (q, *J* = 35.5 Hz), 86.2, 24.7, 24.0; HRMS (ESI): *m/z* calcd. for [C<sub>8</sub>H<sub>13</sub>F<sub>3</sub>O<sub>3</sub>Na]<sup>+</sup> 237.0714, found 237.0723.

### 3.10 Evidence for the formation of 1a-ate : $^1\text{H}$ and $^{11}\text{B}$ NMR analysis of reaction

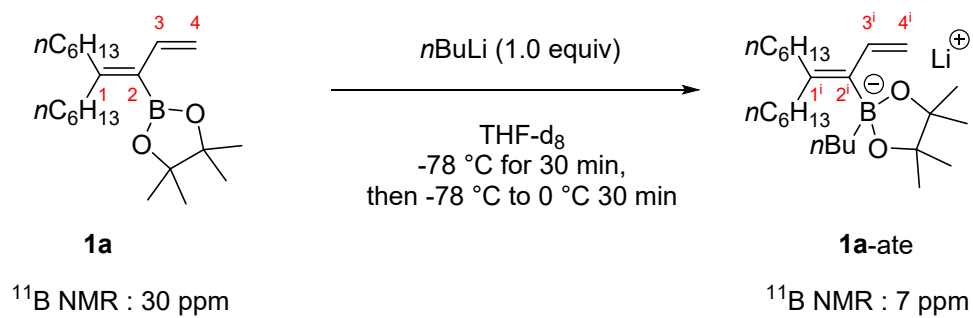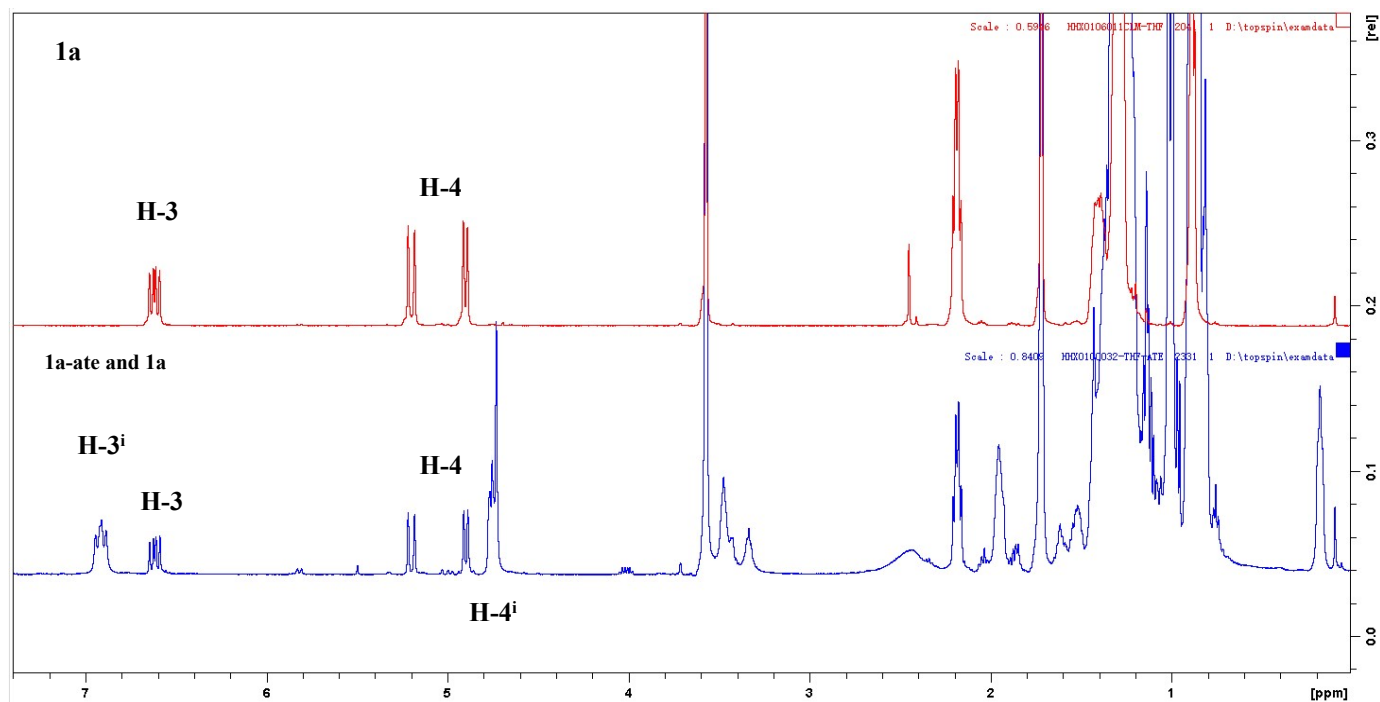

Figure S2. Changes of  $^1\text{H}$  NMR after addition of  $n\text{BuLi}$

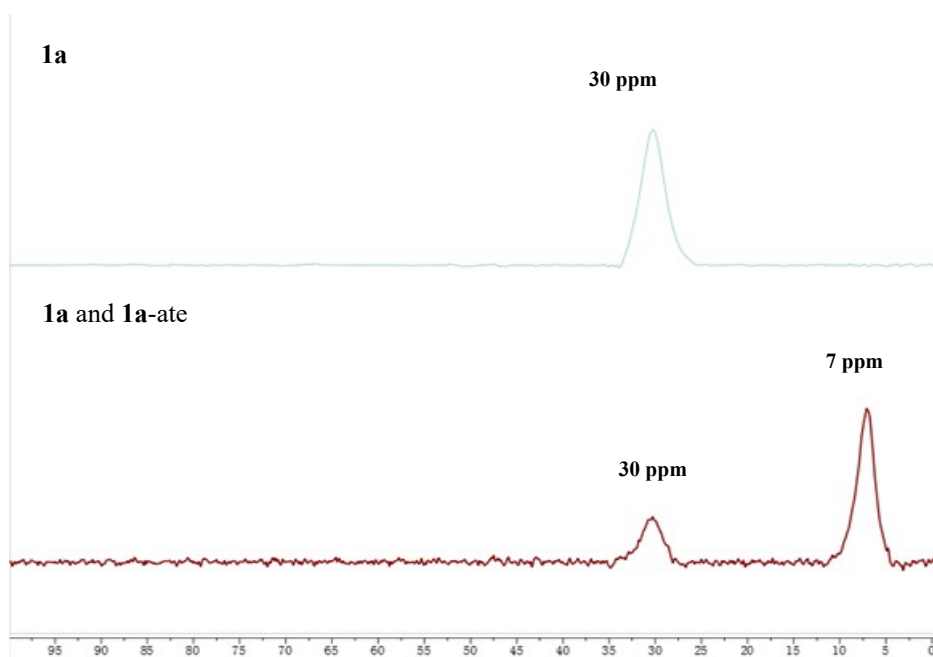

Figure S3. Changes of  $^{11}\text{B}$  NMR after addition of  $n\text{BuLi}$

### 3.11 Monitoring the course of the reaction by $^1\text{H}$ and $^{11}\text{B}$ NMR

Homoallenylboration reaction was performed in THF- $d_8$ . The reaction mixture was transferred to the NMR tube and analysed directly.

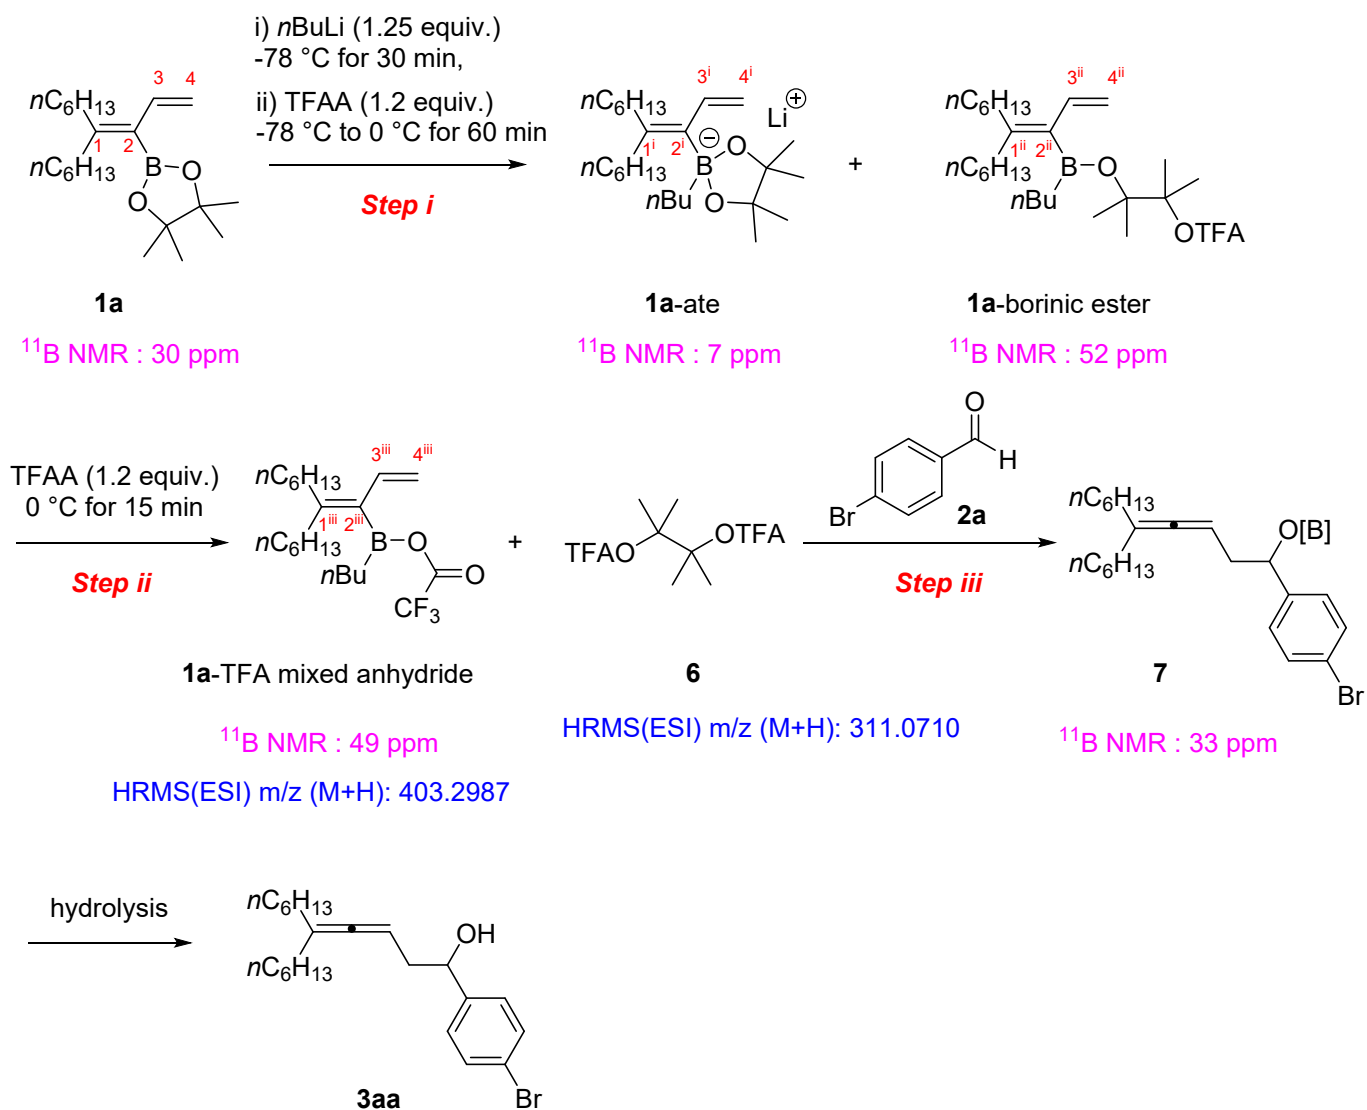

Sequential addition of *n*BuLi/TFAA (1.25 and 1.20 equiv. respectively) and TFAA (1.2 equiv.) to a solution of **1a** in THF-*d*<sub>8</sub>, protons' signals of C-3 and C-4 continuously changed in crude <sup>1</sup>H NMR spectra (Figure S4).

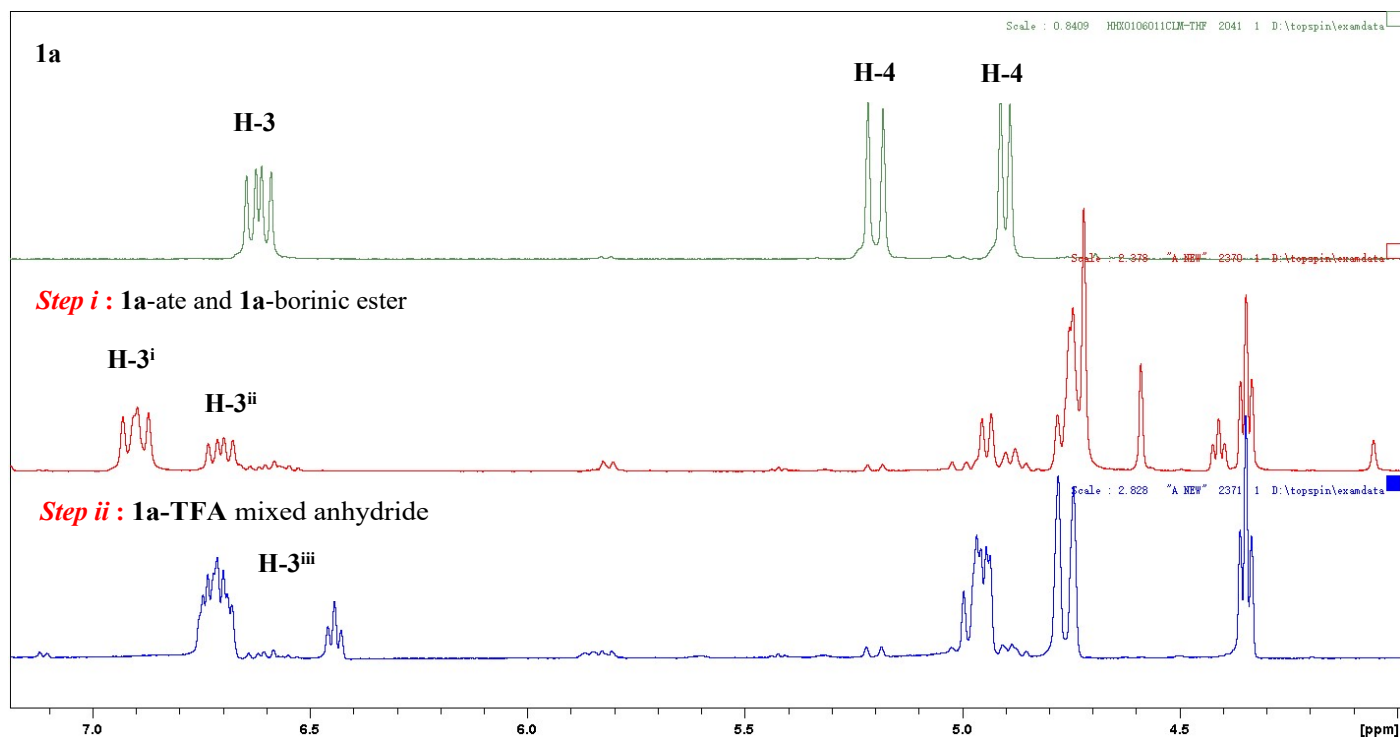

**Figure S4.** Changes of <sup>1</sup>H NMR after sequential addition of *n*BuLi/TFAA and following TFAA

Addition of *n*BuLi/TFAA (1.25 and 1.2 equiv. respectively) to a solution of **1a** in THF-*d*<sub>8</sub>, signals at 7 ppm, 33 ppm and 52 ppm were first observed and by <sup>11</sup>B NMR analysis conducted at 0 °C. Then, following TFAA (1.2 equiv.) was injected into the reaction mixture, signal at 7 ppm disappeared and broad signal at 52 ppm changed to 49 ppm. Besides, signal at 33 ppm in <sup>11</sup>B NMR indicated the formation of *n*BuBpin in the transformation, compared with the standard sample (Figure S5).

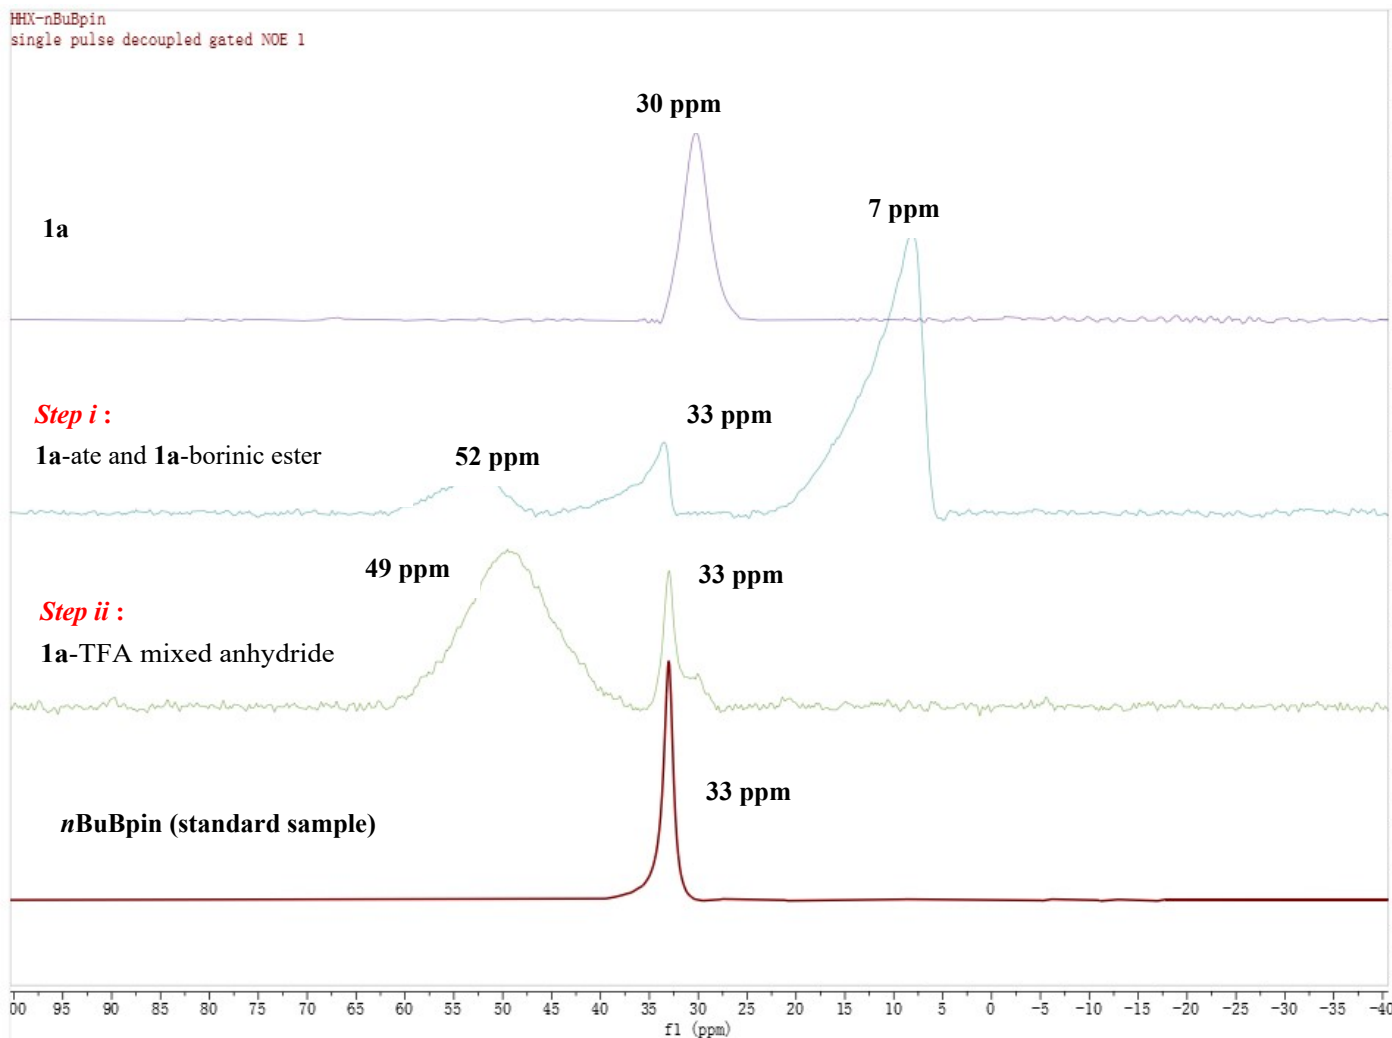

**Figure S5.** Changes of <sup>11</sup>B NMR after sequential addition of *n*BuLi/TFAA and additional TFAA

Following addition of *p*-bromobenzaldehyde **2a** (**Step iii**), protons' signals of C-3 and C-4 continuously declined over time in crude  $^1\text{H}$  NMR spectra (Figure S6). New signals appeared and increased simultaneously in the aromatic region. Then, following addition of water, protons' signals of **3aa** appeared after hydrolysis of intermediates **7**.

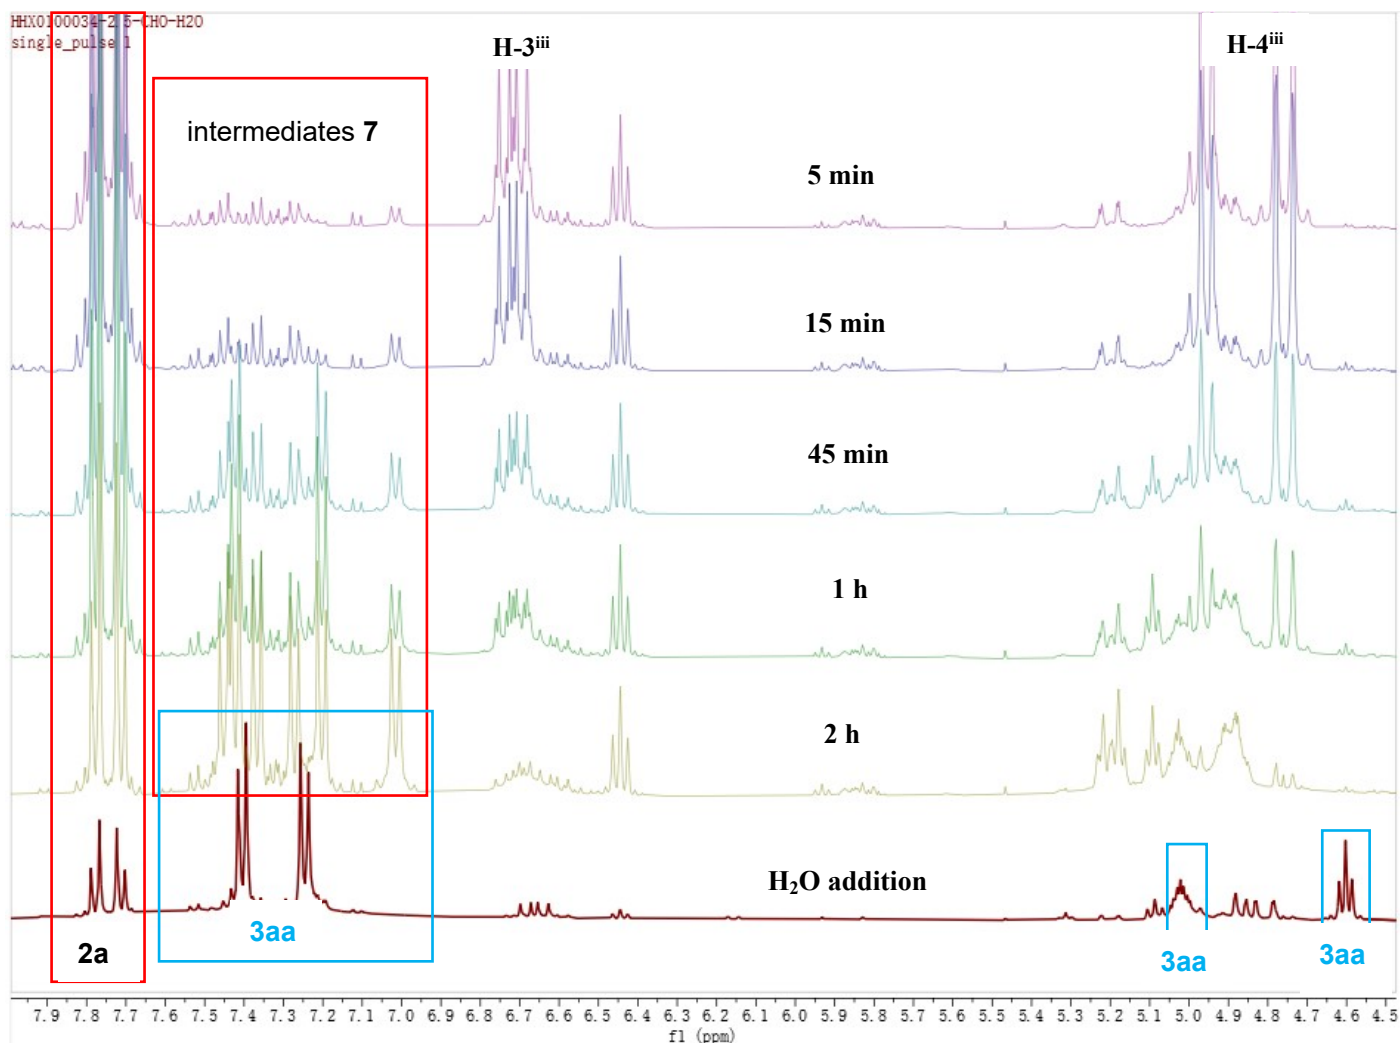

**Figure S6.** Changes of  $^1\text{H}$  NMR after addition of *p*-bromobenzaldehyde **2a**



Following addition of *p*-bromobenzaldehyde **2a** (**Step iii**), signal of **1a**-TFA mixed anhydride continuously declined over time in  $^{11}\text{B}$  NMR spectra (Figure S7). Simultaneously, signal at 33 ppm increased dramatically. Then, following addition of water, no significant change in  $^{11}\text{B}$  NMR spectra was observed, indicating the formation of *n*-butylboronates.

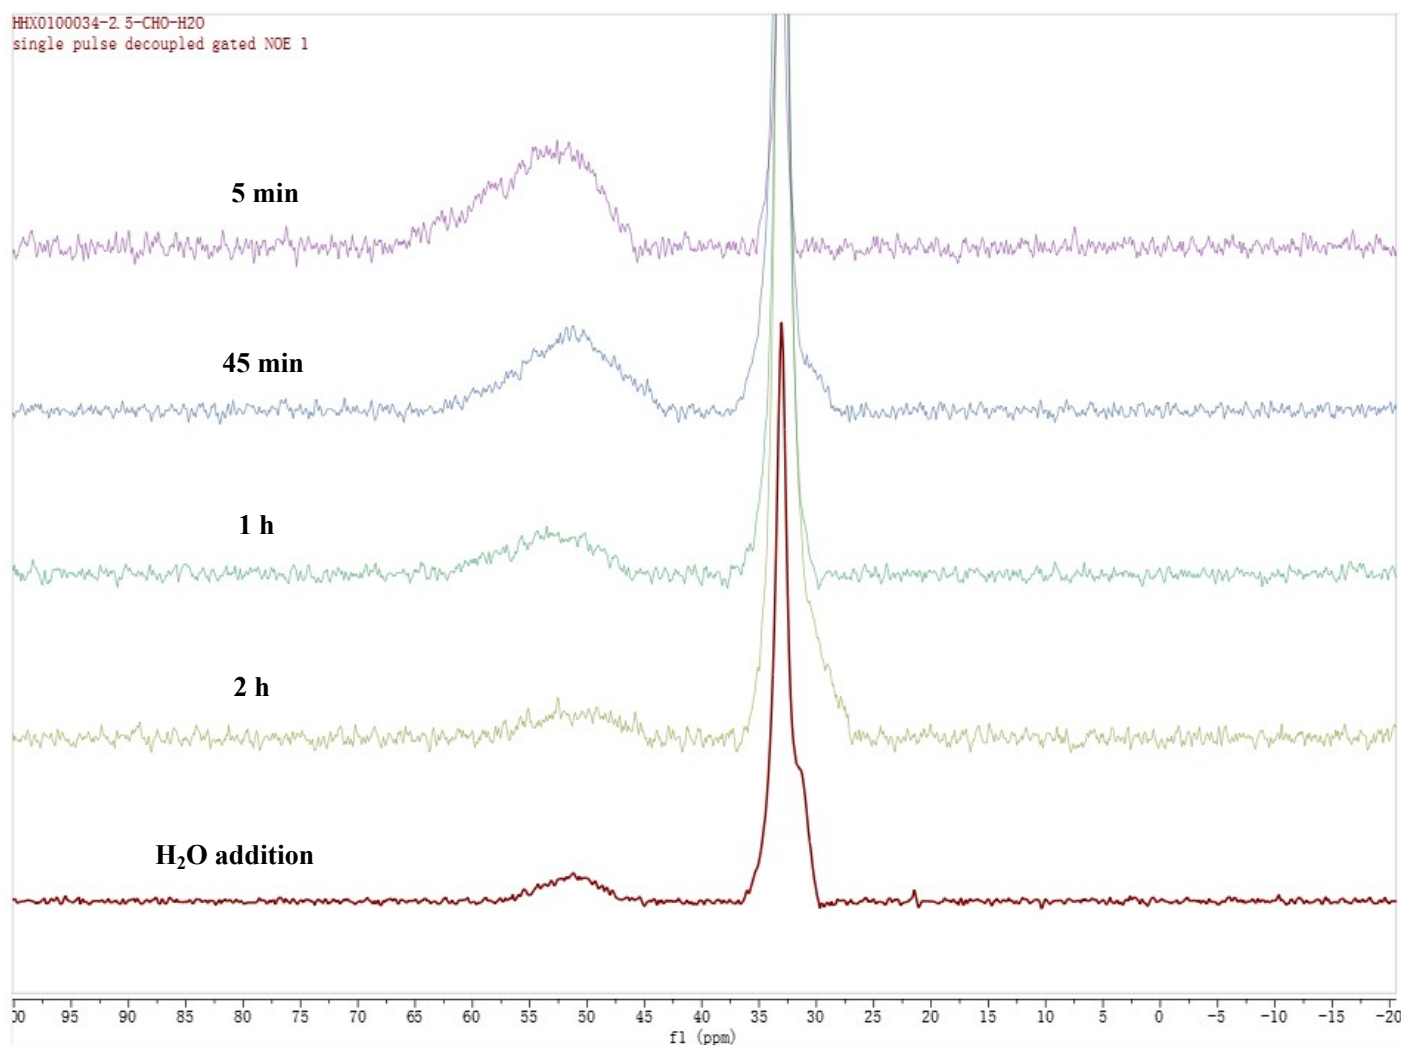

**Figure S7.** Changes of  $^{11}\text{B}$  NMR after addition of *p*-bromobenzaldehyde **2a**

### 3.12 HRMS measurement of reaction mixture after secondary injection of additional TFAA:

#### Evidence for the formation of 1a-TFA mixed anhydride and 6

HRMS (ESI): m/z [M+H]<sup>+</sup> calcd. for [C<sub>22</sub>H<sub>39</sub>BF<sub>3</sub>O<sub>2</sub>]<sup>+</sup> 403.2995, found 403.2987.

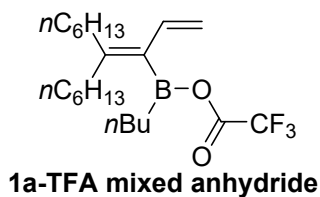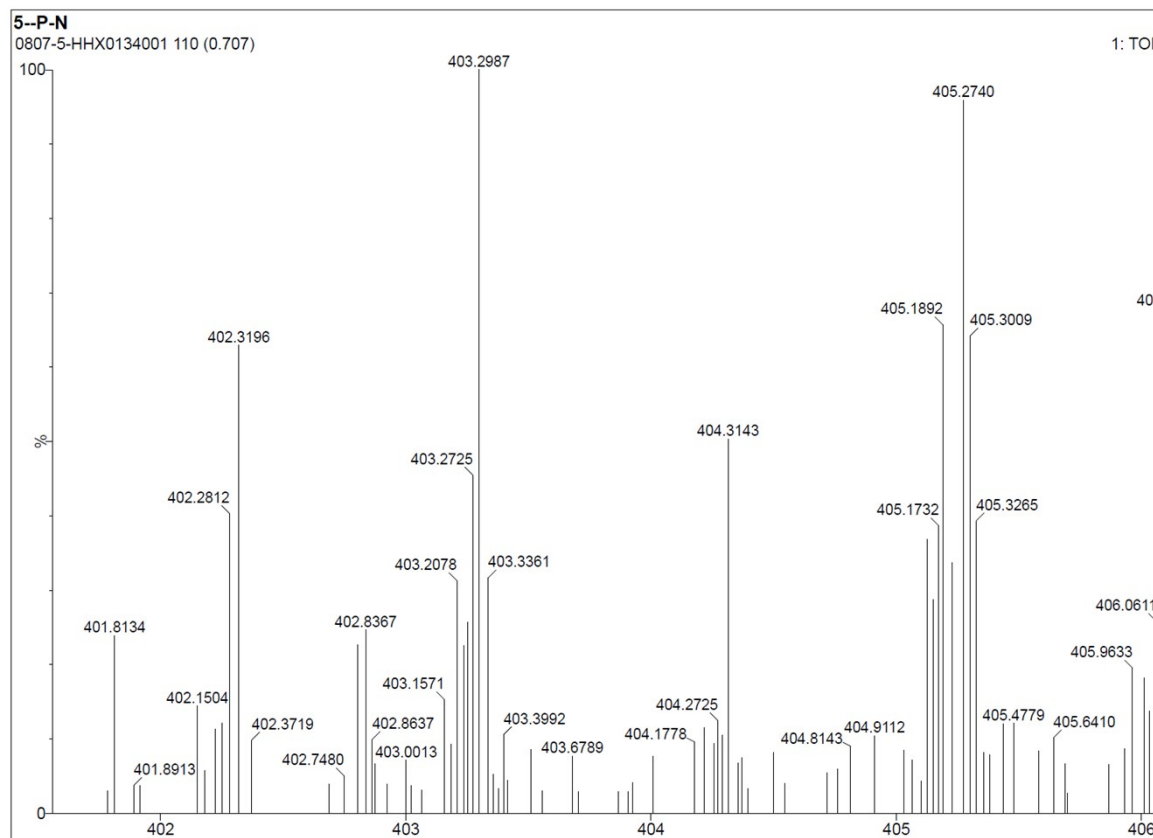

#### Elemental Composition Report

Page 1

#### Single Mass Analysis

Tolerance = 10.0 PPM / DBE: min = -1.5, max = 50.0

Element prediction: Off

Number of isotope peaks used for i-FIT = 3

Monoisotopic Mass, Even Electron Ions

7788 formula(e) evaluated with 1 results within limits (all results (up to 1000) for each mass)

Elements Used:

C: 22-22 H: 0-50 N: 0-11 O: 0-18 P: 0-3 F: 3-3 B: 0-20

5--P-N  
0807-5-HHX0134001 110 (0.707)

1: TOF MS ES+  
7.03e+002

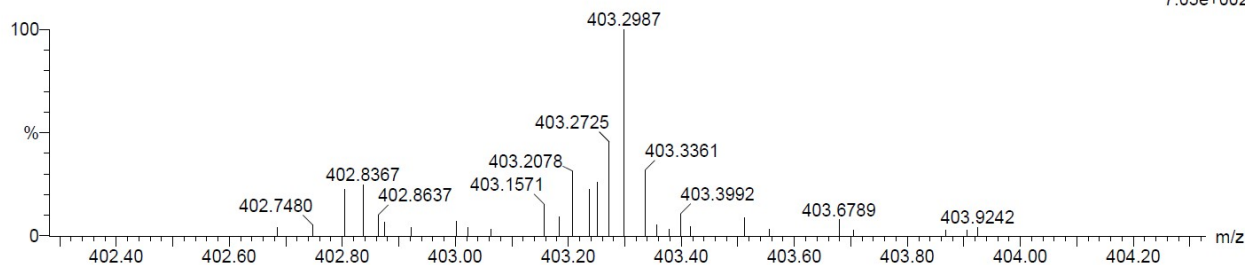

Minimum: -1.5  
Maximum: 5.0 10.0 50.0

| Mass     | Calc. Mass | mDa  | PPM  | DBE | i-FIT | Norm | Conf (%) | Formula         |
|----------|------------|------|------|-----|-------|------|----------|-----------------|
| 403.2987 | 403.2995   | -0.8 | -2.0 | 2.5 | 106.9 | n/a  | n/a      | C22 H39 O2 F3 B |

Figure S8. HRMS spectra of 1a-TFA mixed anhydride

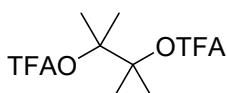

6

HRMS (ESI): m/z [M+H]<sup>+</sup> calcd. for [C<sub>10</sub>H<sub>13</sub>F<sub>6</sub>O<sub>4</sub>]<sup>+</sup> 311.0718, found 311.0710

### Elemental Composition Report

Page 1

#### Single Mass Analysis

Tolerance = 10.0 PPM / DBE: min = -1.5, max = 50.0

Element prediction: Off

Number of isotope peaks used for i-FIT = 3

Monoisotopic Mass, Even Electron Ions

249 formula(e) evaluated with 1 results within limits (all results (up to 1000) for each mass)

Elements Used:

C: 10-10 H: 0-50 N: 0-11 O: 0-18 F: 6-6 P: 0-3

5--P-N

0807-5-HHX0134001 42 (0.286)

1: TOF MS ES+  
2.37e+002

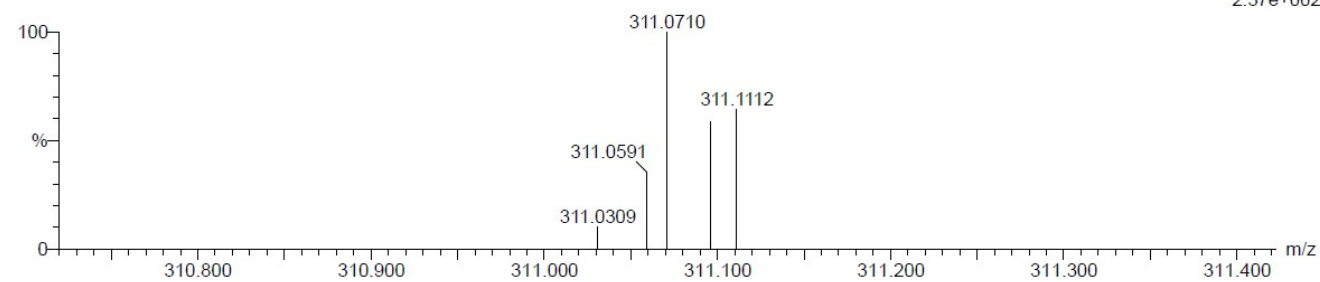

Minimum: -1.5  
Maximum: 5.0 10.0 50.0

| Mass     | Calc. Mass | mDa  | PPM  | DBE | i-FIT | Norm | Conf(%) | Formula       |
|----------|------------|------|------|-----|-------|------|---------|---------------|
| 311.0710 | 311.0718   | -0.8 | -2.6 | 1.5 | 39.0  | n/a  | n/a     | C10 H13 O4 F6 |

Figure S9. HRMS spectra of 6

### 3.13 $^{11}\text{B}$ NMR analysis of reaction with $(\text{CHF}_2\text{CO})_2\text{O}$ : Evidence for reactive specie S2

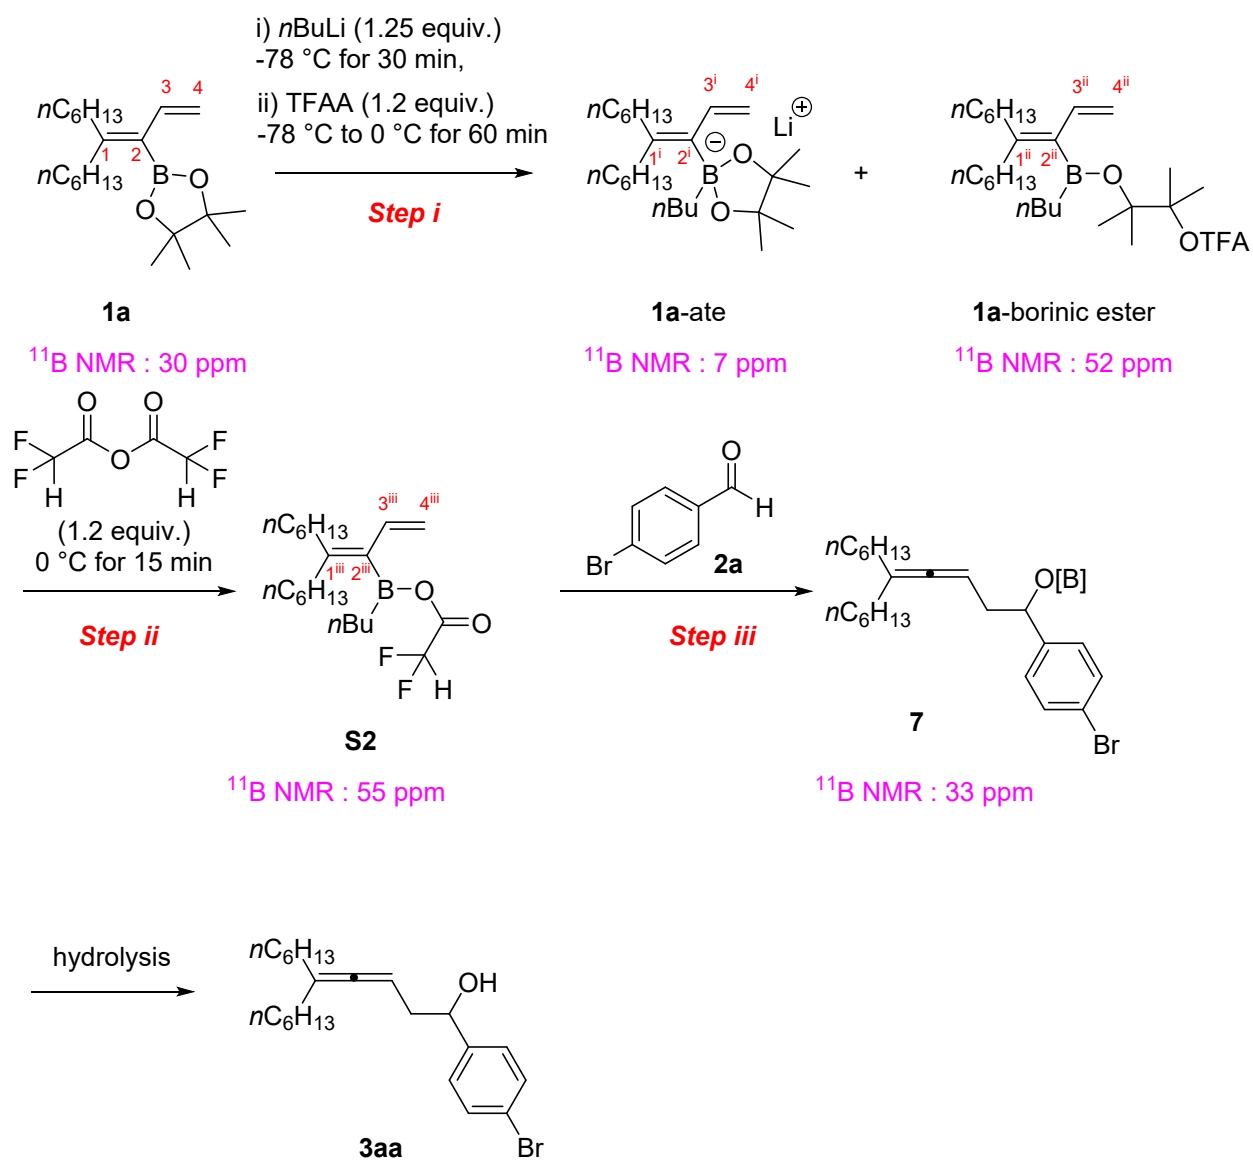

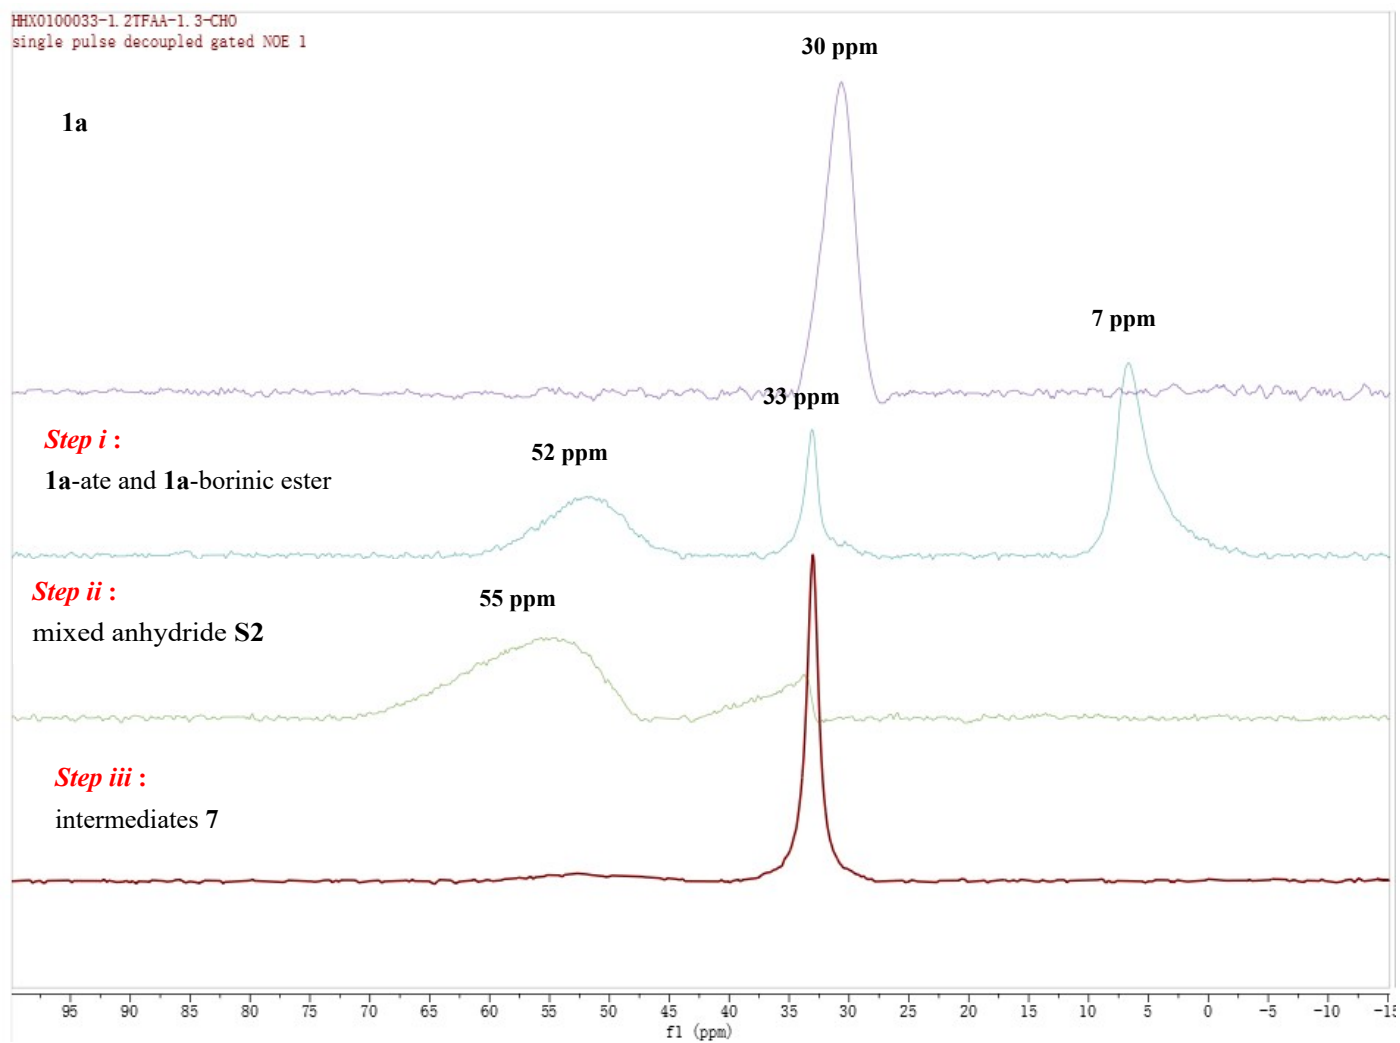

**Figure S10.** Changes of  $^{11}\text{B}$  NMR in the course of the reaction using  $(\text{CHF}_2\text{CO})_2\text{O}$

### 3.14 $^{11}\text{B}$ NMR analysis of reaction for the synthesis of **1a**-TFA mixed anhydride using crude **1a**-BOH and TFAA

In the reaction, after sequential addition of DIPEA and TFAA to the solution of crude **1a**-BOH in THF- $d_8$  at 0 °C, two new species (49 ppm and 6 ppm) was apparently formed in the mixture according to the  $^{11}\text{B}$  NMR spectrum. The signal at 49 ppm indicated the formation of **1a**-TFA. The other signal at 6 ppm was assigned as tetracoordinated boron species **S4**, which was probably produced by the further coordination of TFA anion with **1a**-TFA due to the strong Lewis acidity of **1a**-TFA.

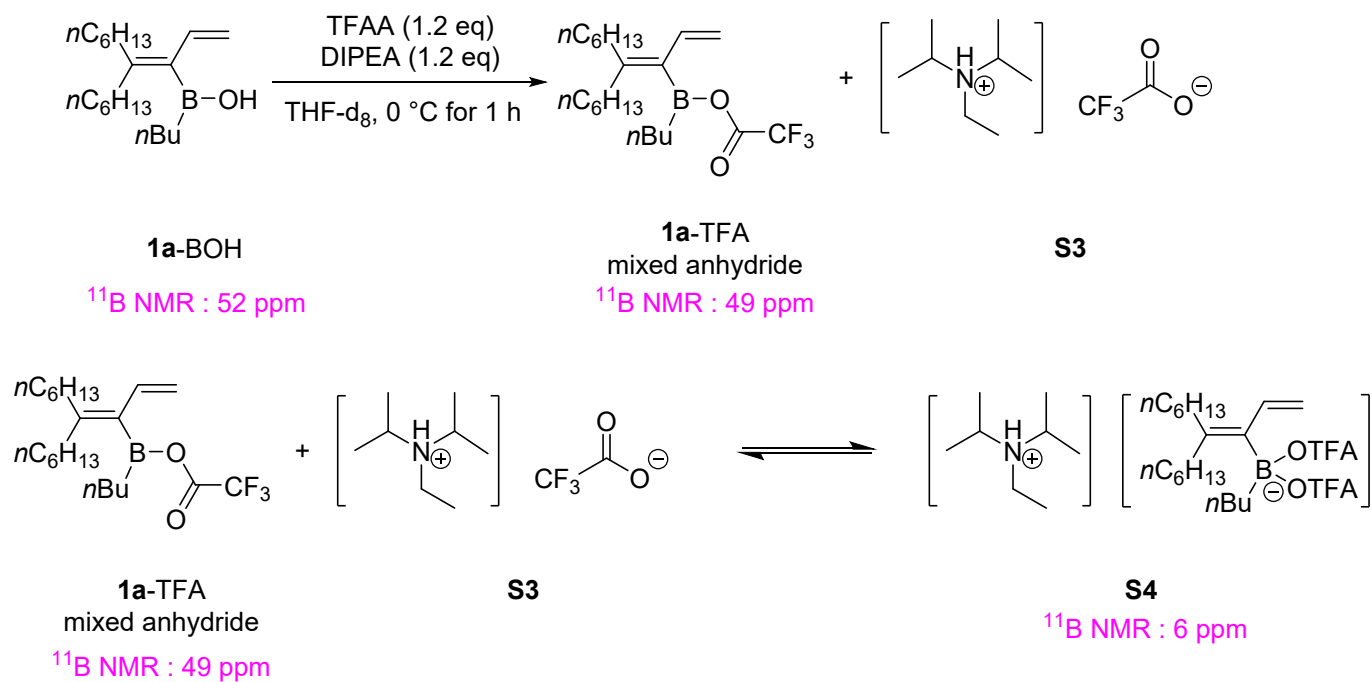

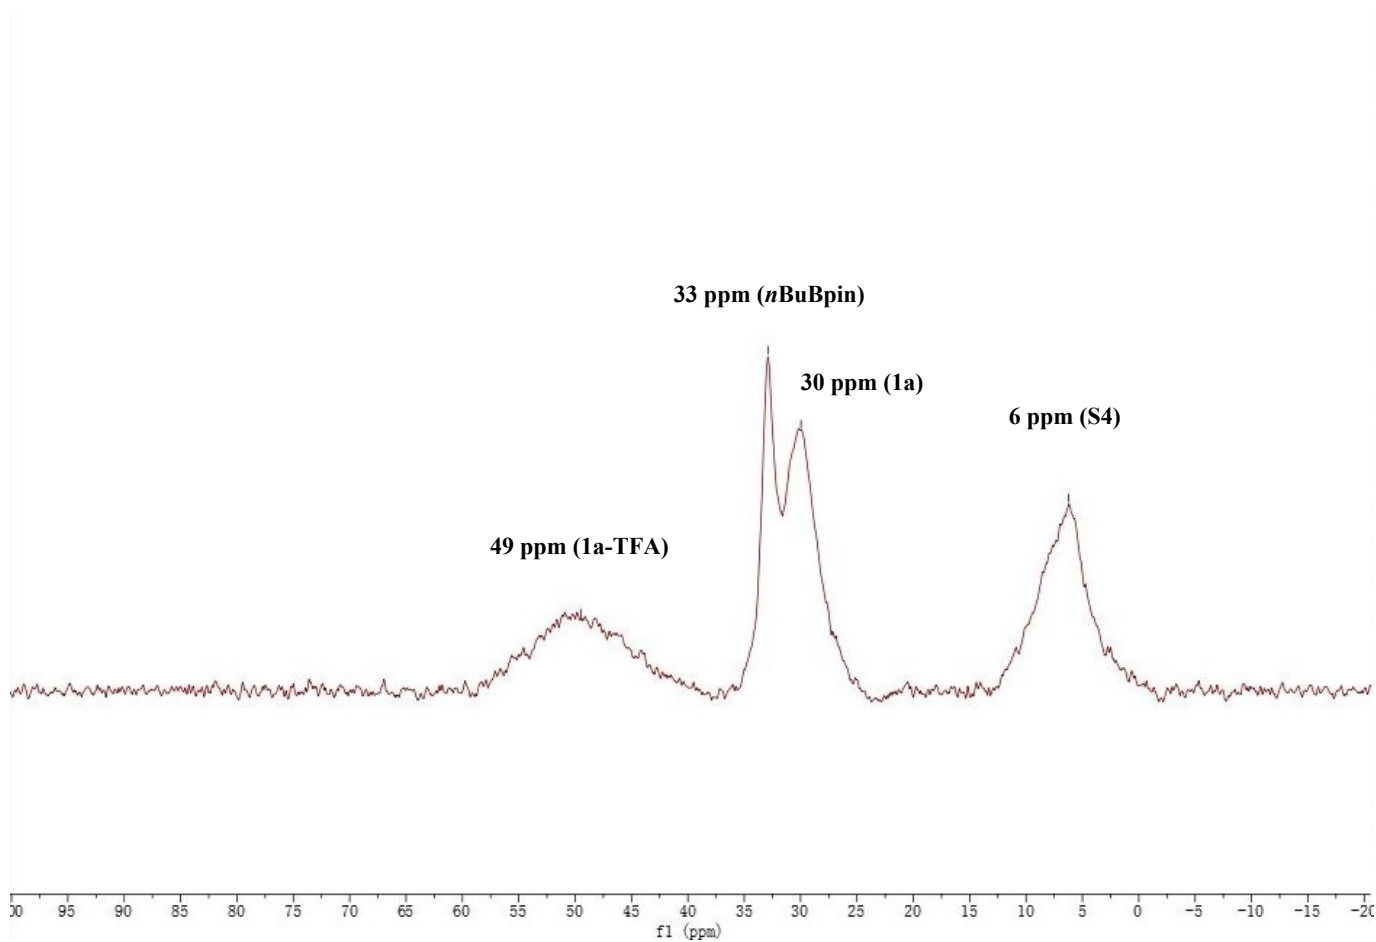

**Figure S11.**  $^{11}\text{B}$  NMR of reaction mixture after addition of DIPEA and TFAA

#### 4 References

- [1] K. Semba, T. Fujihara, J. Terao, Y. Tsuji, *Angew. Chem. Int. Ed.* **2013**, *52*, 12400-12403.
- [2] W.-D. Zhang, J.-Y. Zou, Q. Zhong, S.-S. Li, J. Zhao, *Chem. Commun.* **2022**, *58*, 1037-1040.
- [3] A. G. A. Geissler, B. Breit, *Org. Lett.* **2021**, *23*, 2621-2625.
- [4] M. Shen, Y. Tu, G. Xie, Q. Niu, H. Mao, T. Xie, R. A. Flowers, X. Lv, X. Wang, *J. Org. Chem.* **2015**, *80*, 52-61.
- [5] B. Gockel, N. Krause, *Org. Lett.* **2006**, *8*, 4485-4488.
- [6] J. Hine, D. Ricard, R. Perz, *J. Org. Chem.* **1973**, *38*, 110-112.
- [7] J. Buddrus, H. Plettenberg, *Chem. Ber.* **1980**, *113*, 1494-1506.

# 5 $^1\text{H}$ , $^{13}\text{C}$ and $^{11}\text{B}$ NMR Spectra

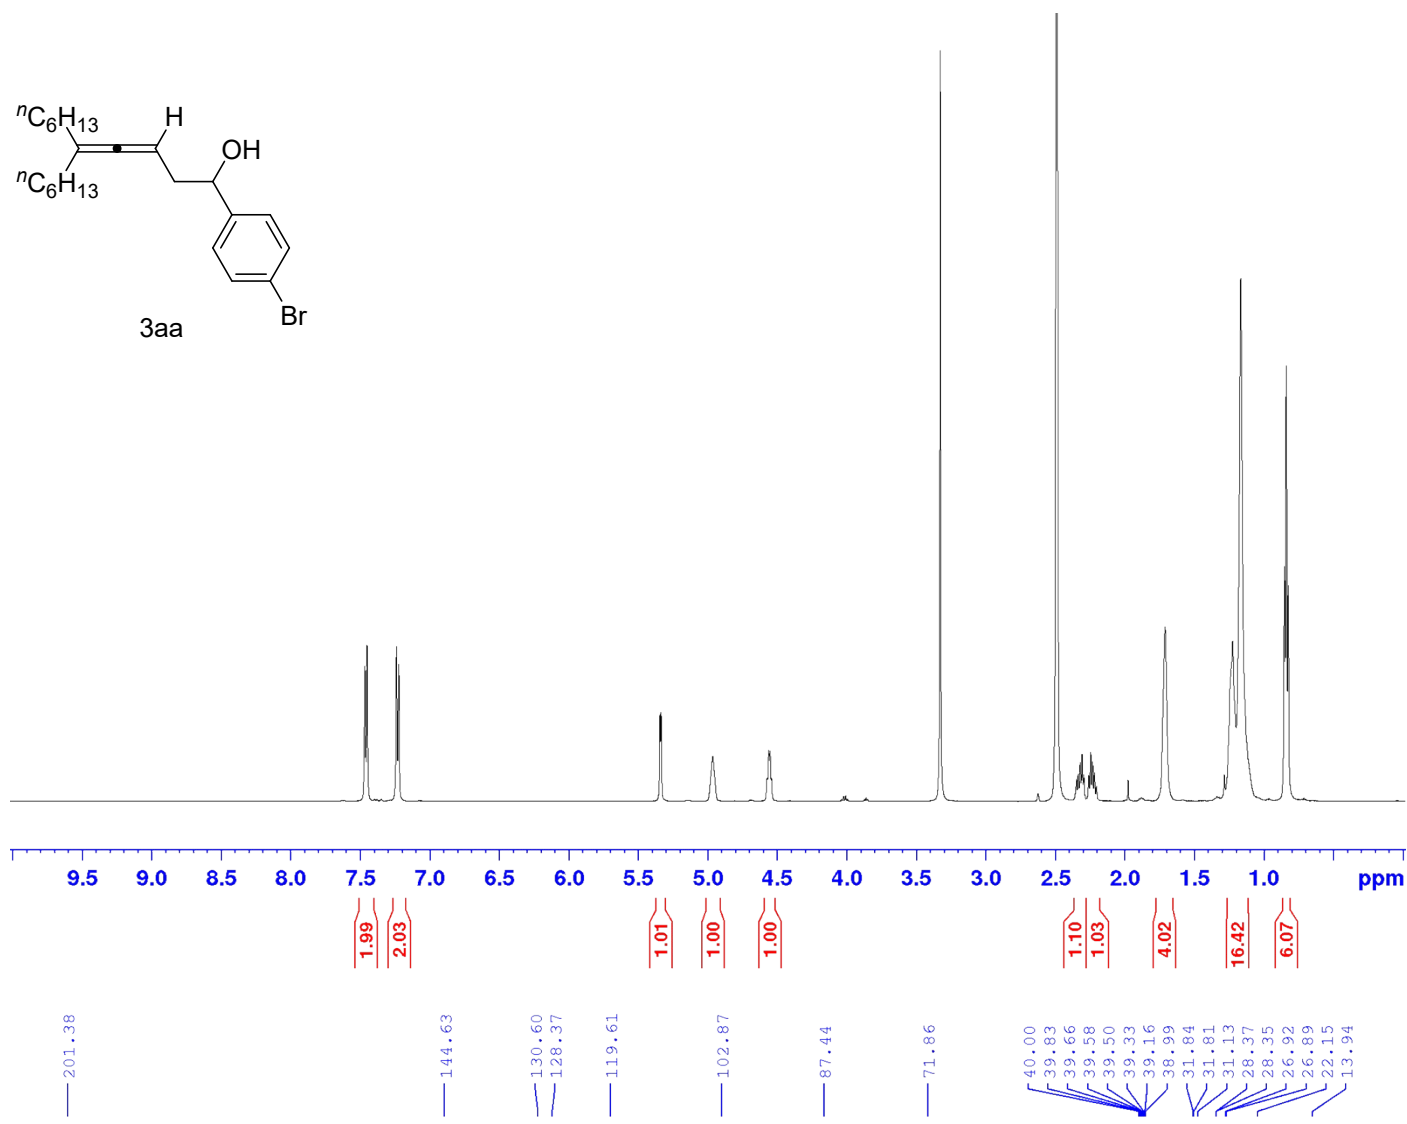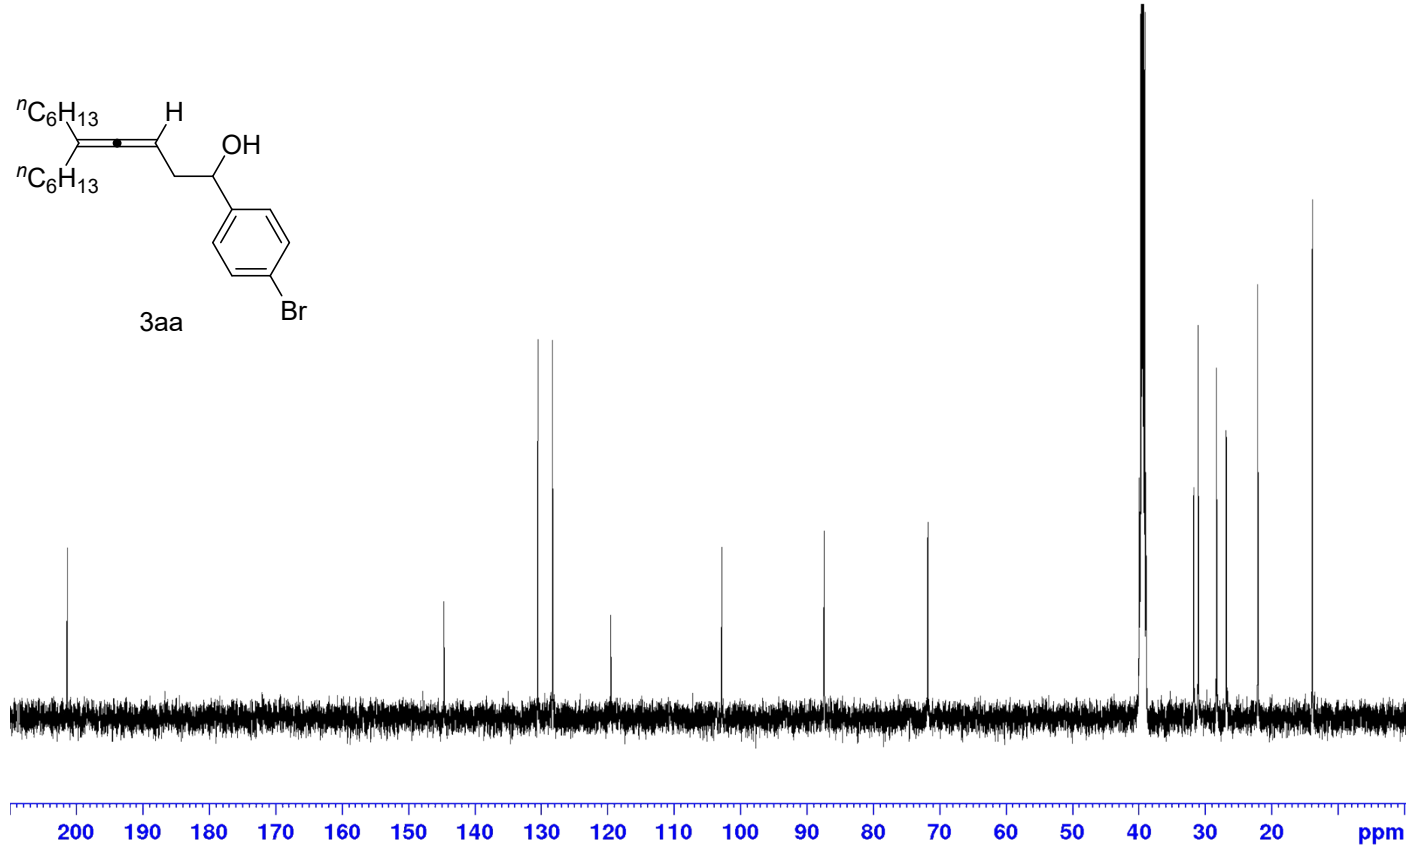



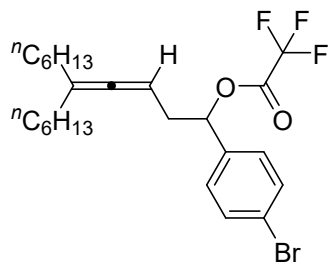

3aa-TFA

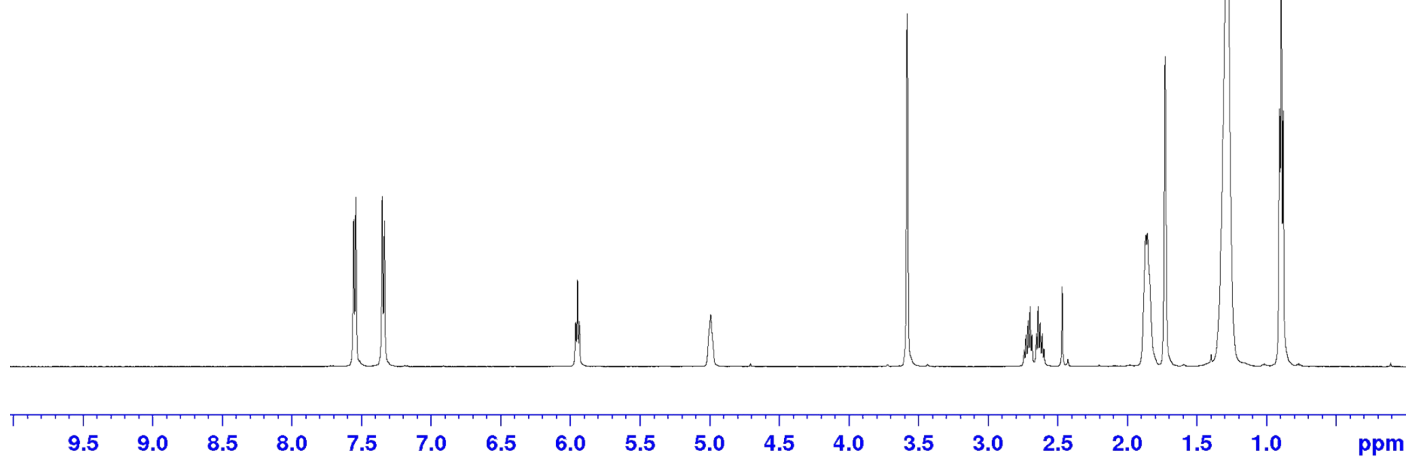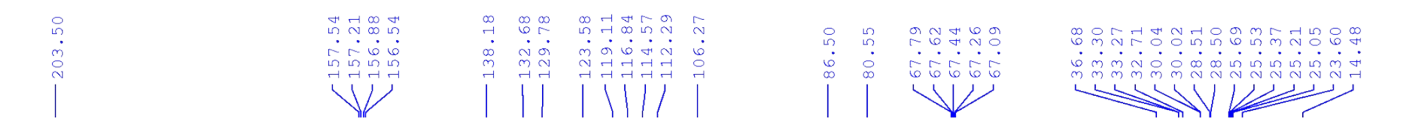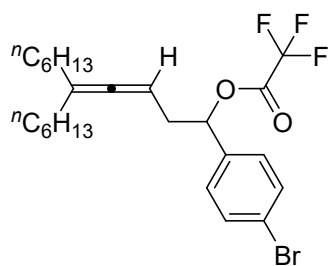

3aa-TFA

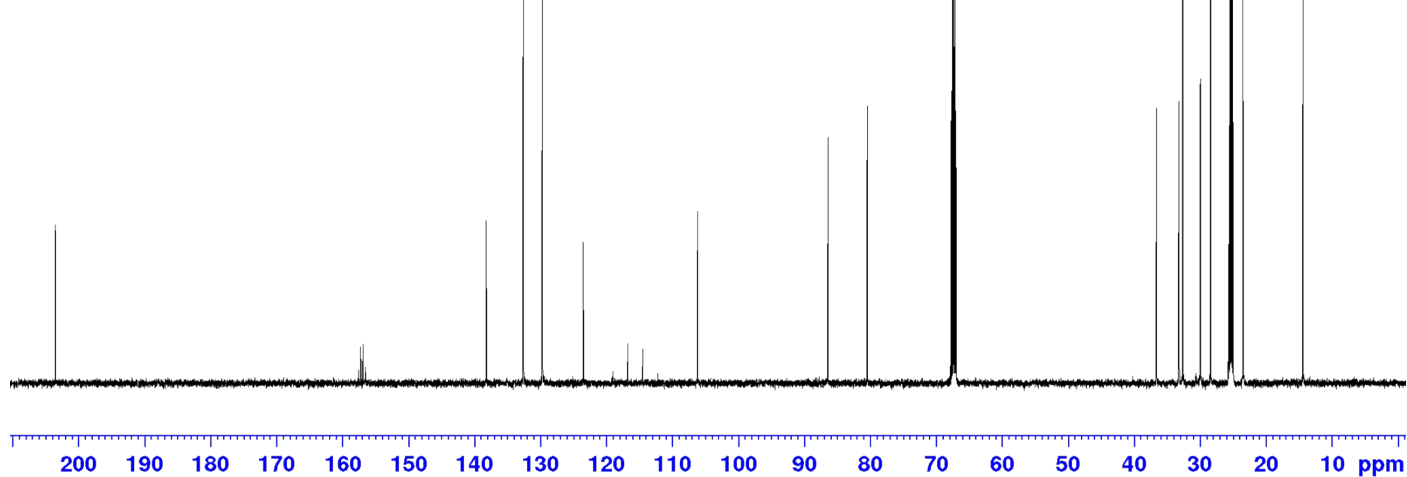

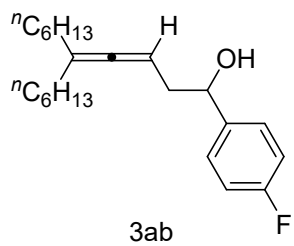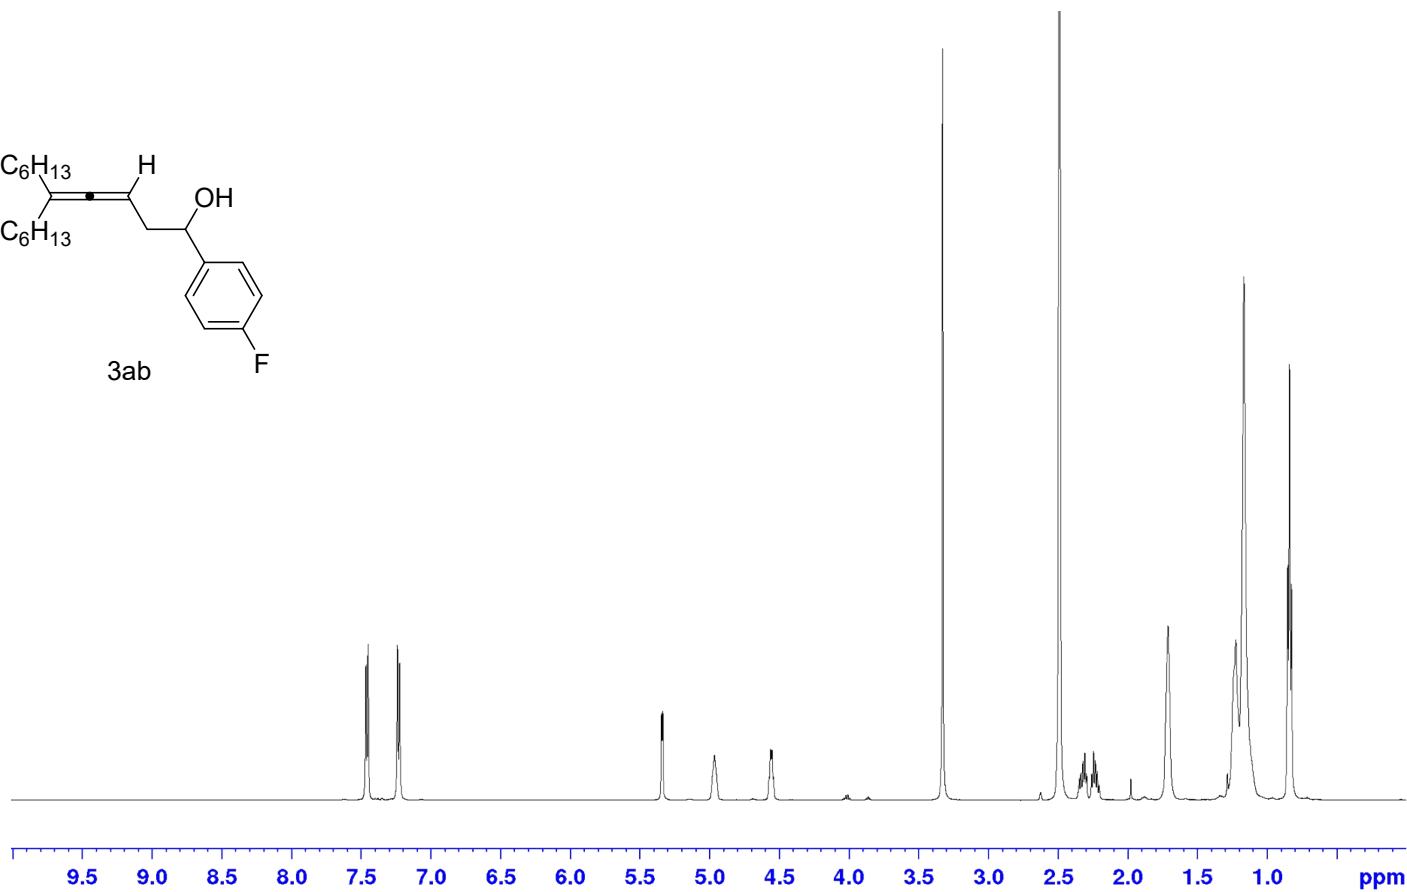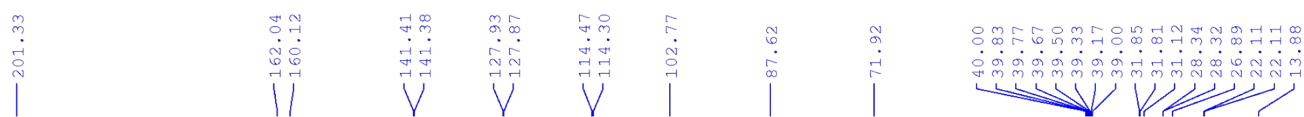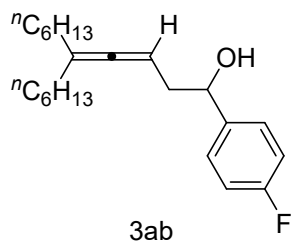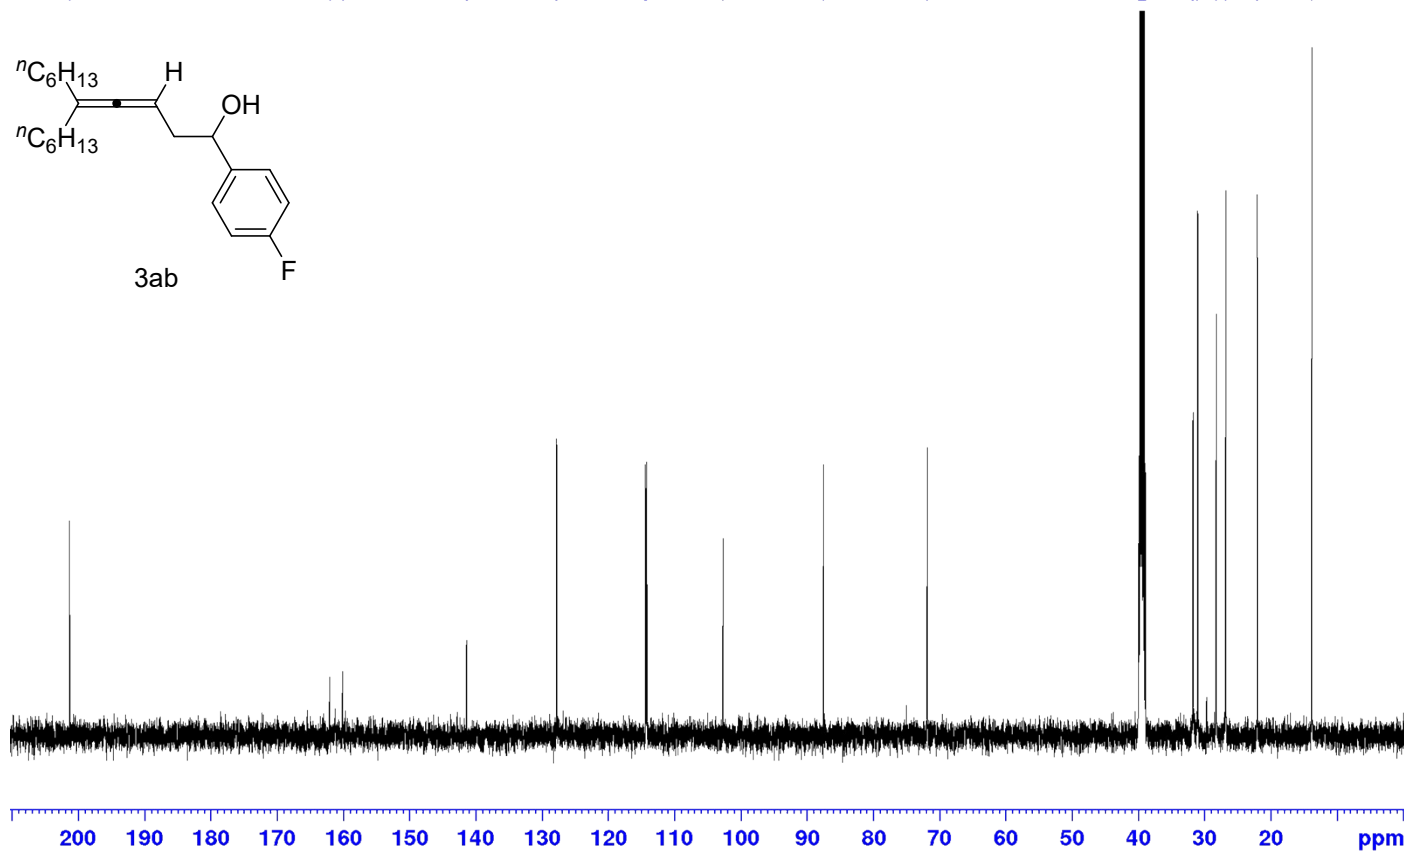

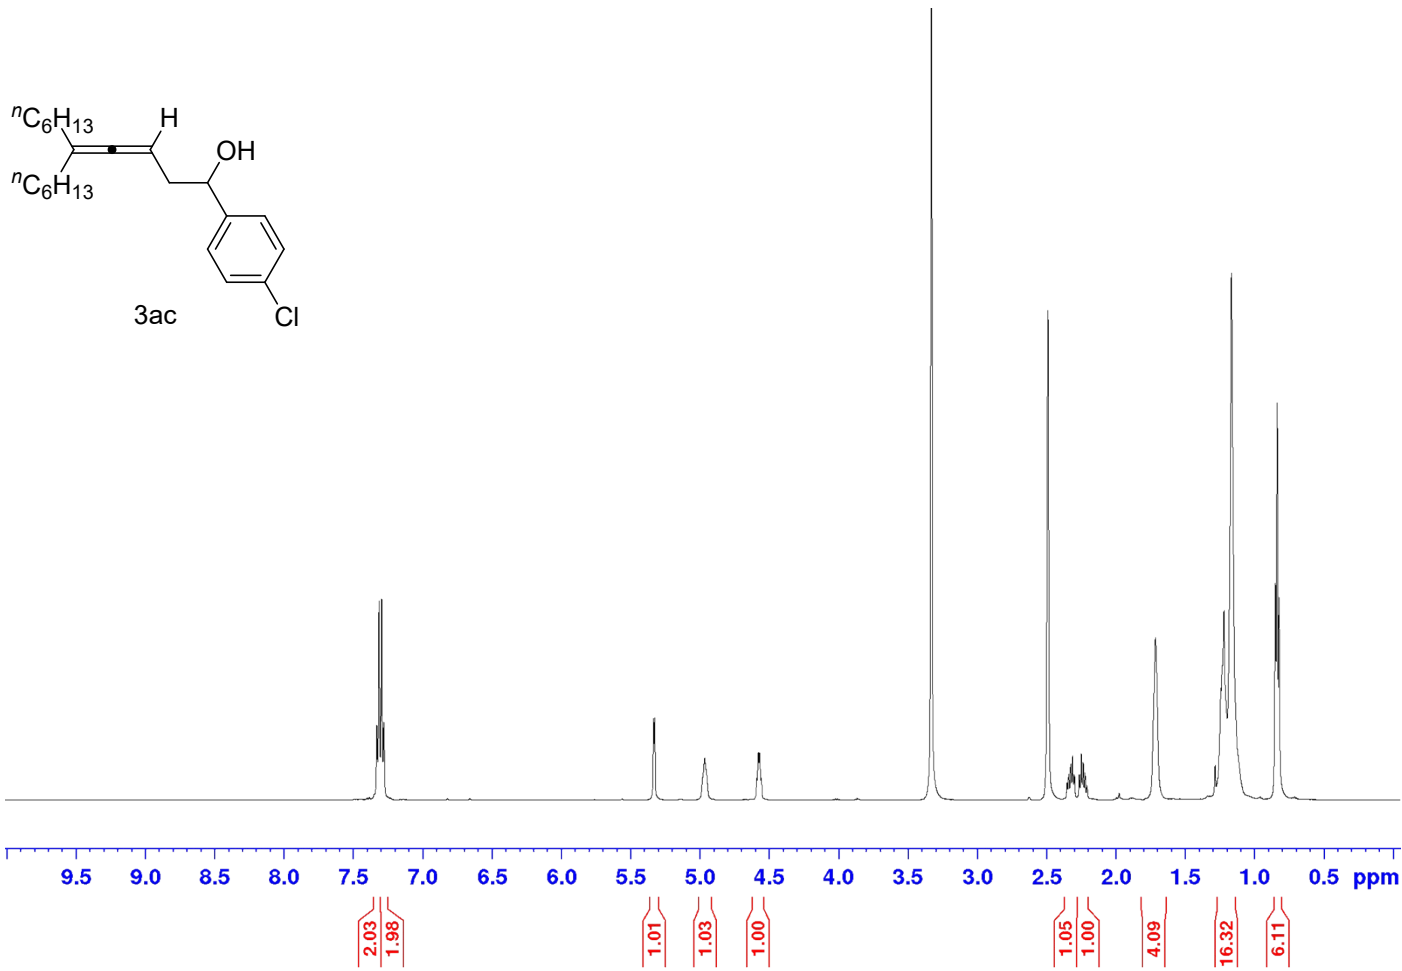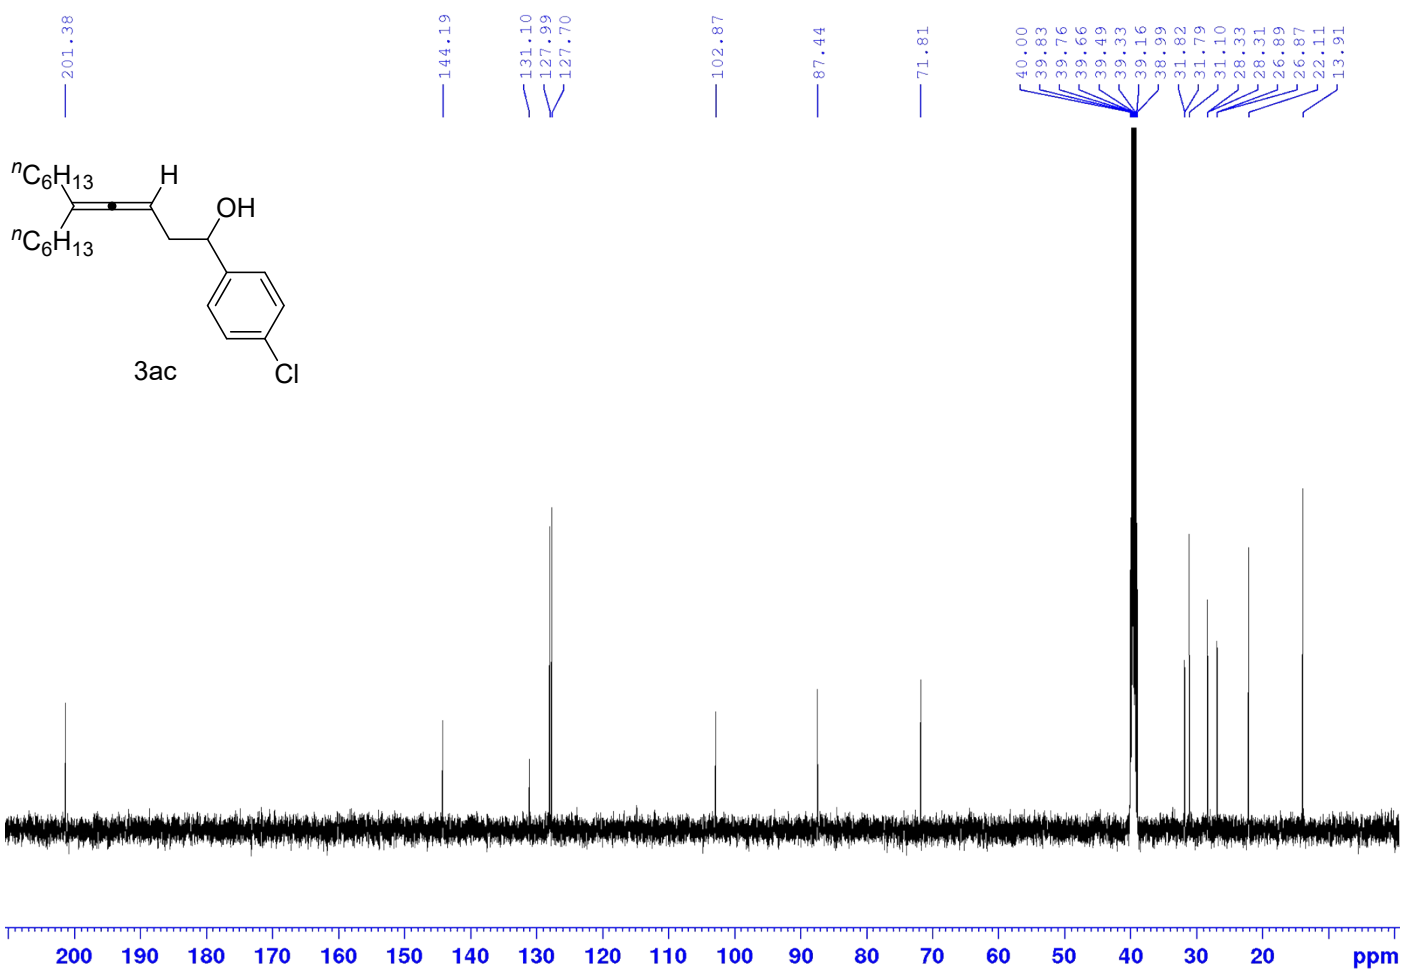

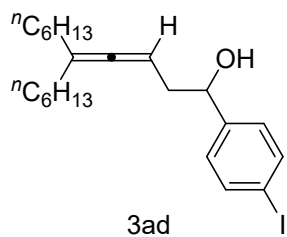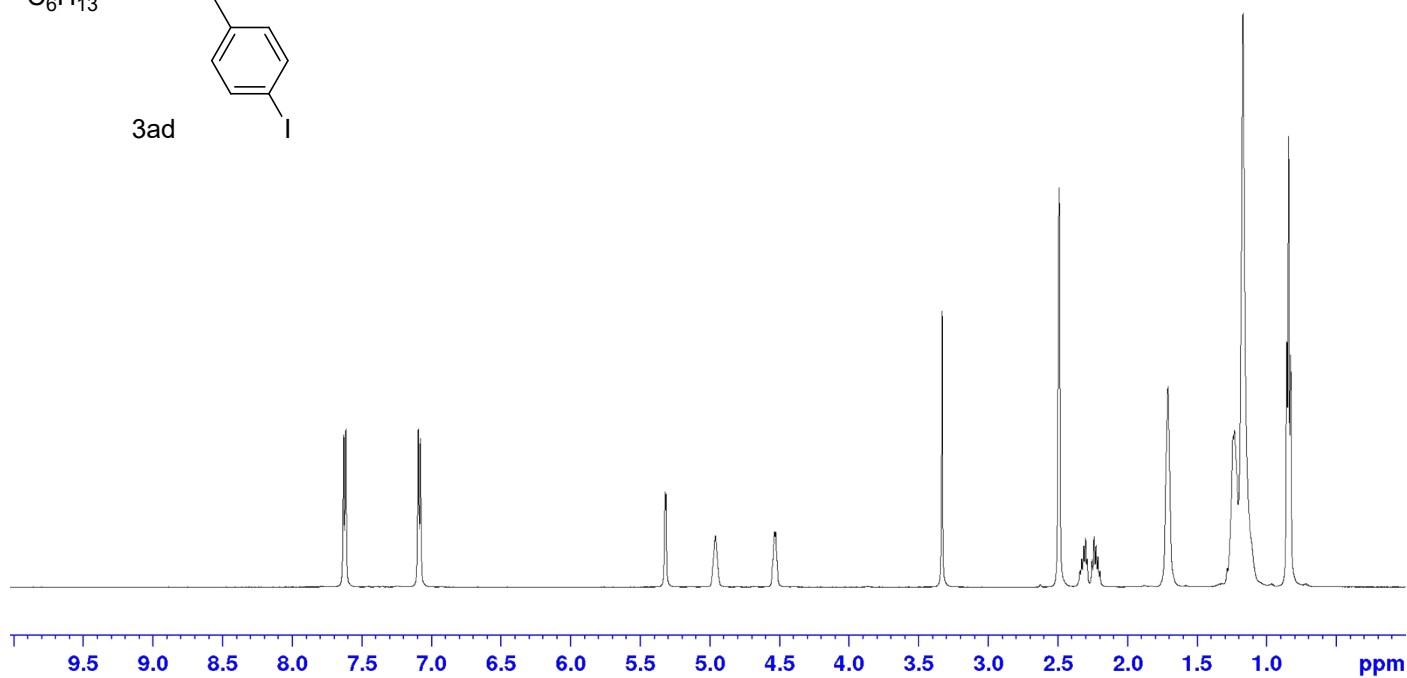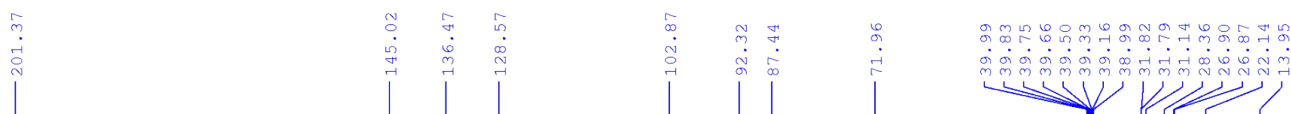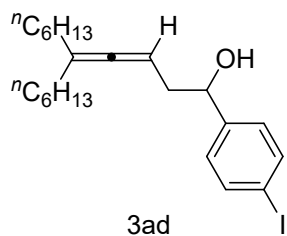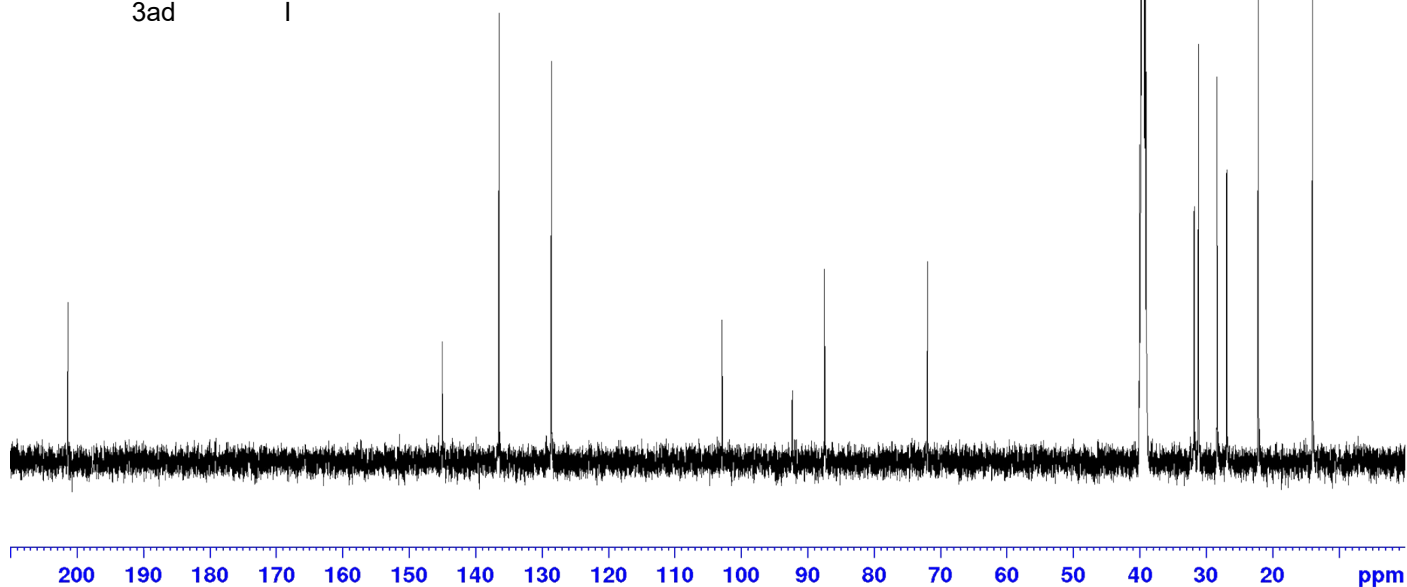

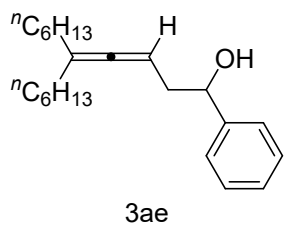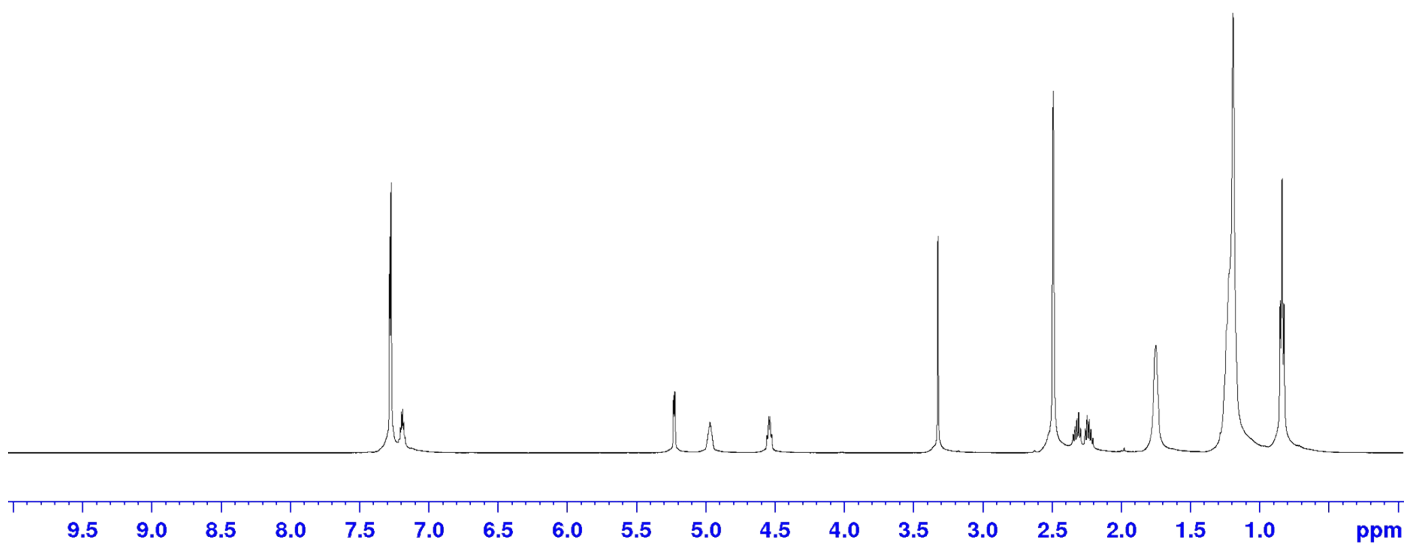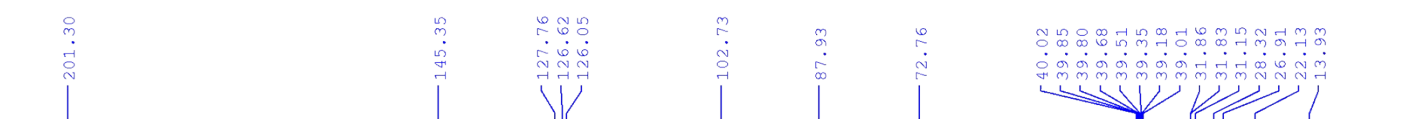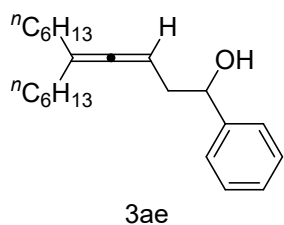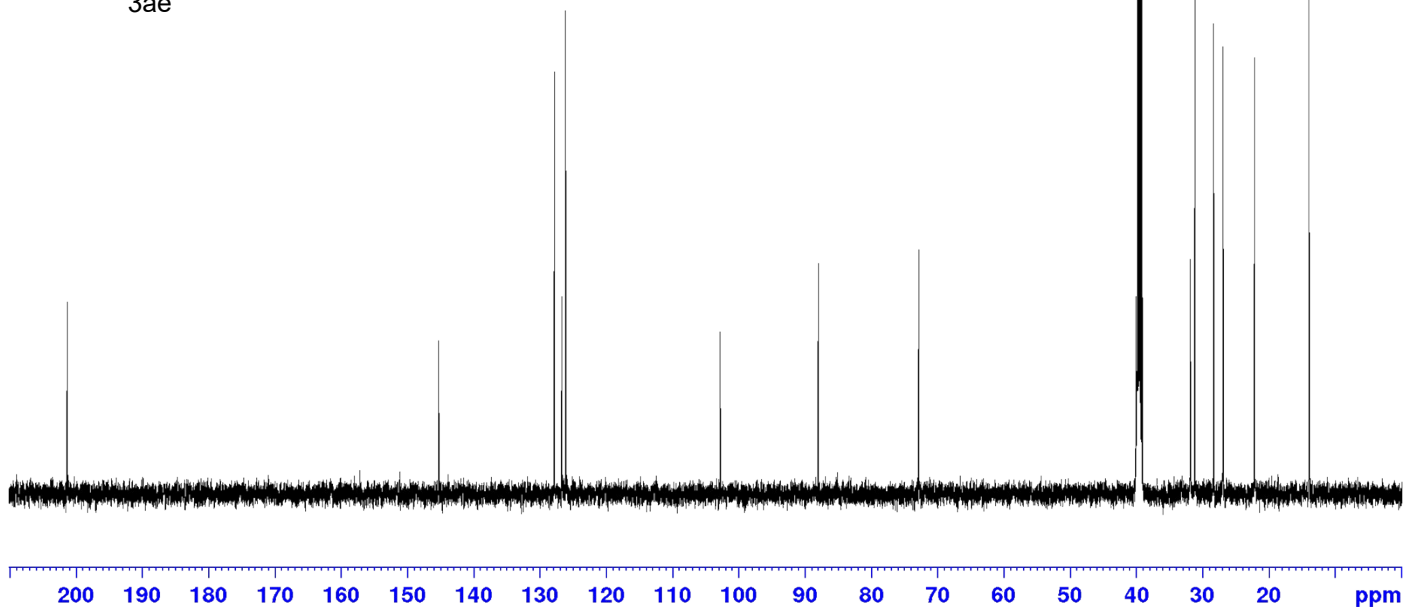

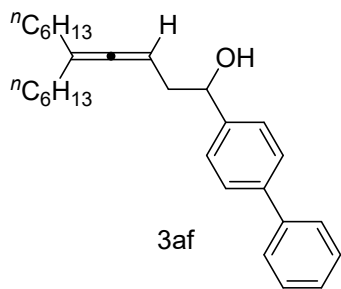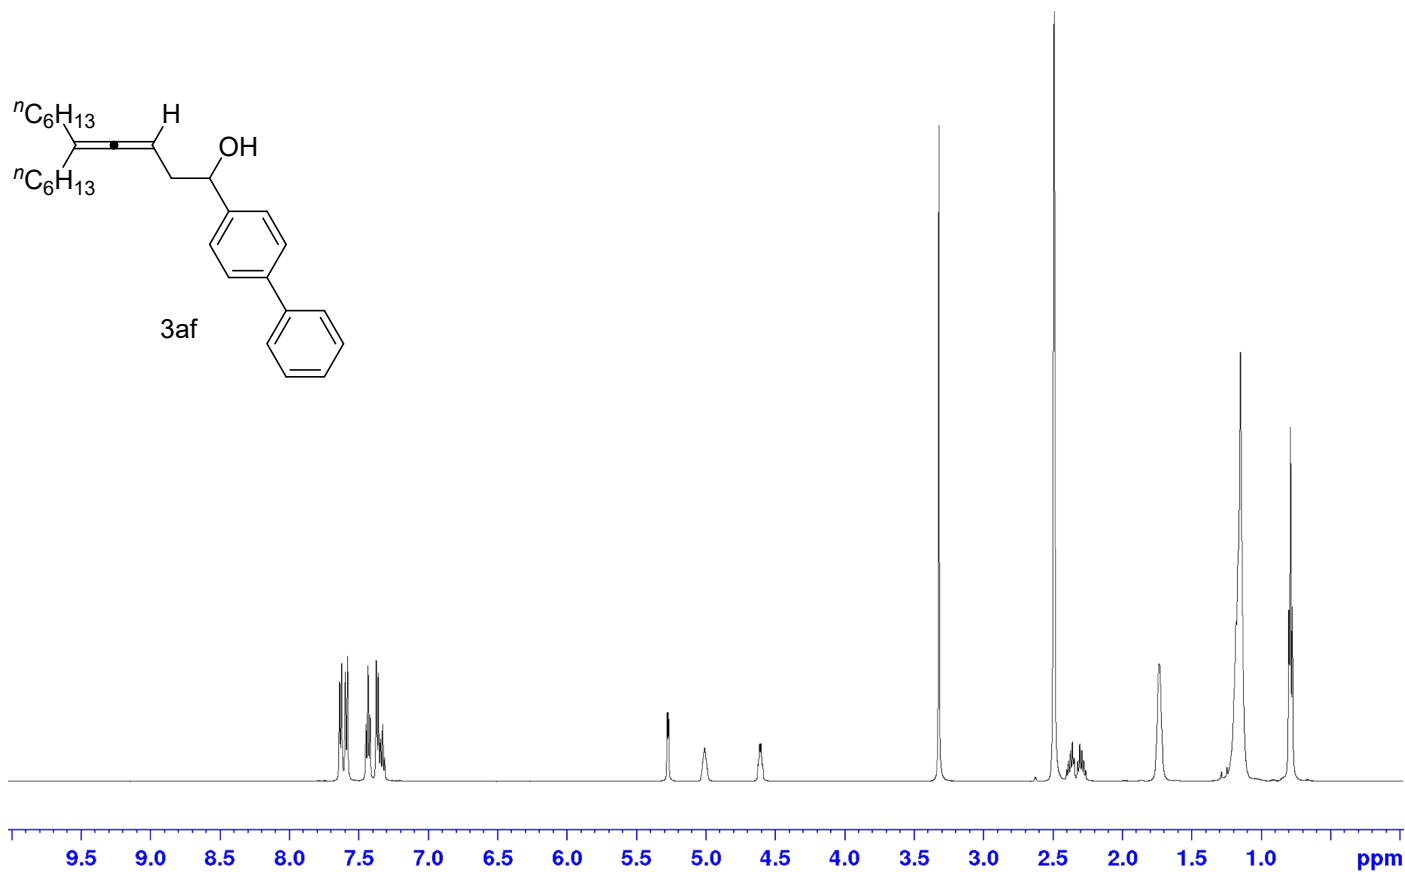

2.01  
2.01  
2.02  
2.01  
1.06

1.00  
1.01  
1.00

1.08  
1.04  
4.01  
16.34  
6.02

201.36

144.52  
140.10  
138.55  
128.82  
127.17  
126.75  
126.44  
126.06

102.82

87.81

72.42

40.00  
39.83  
39.76  
39.66  
39.50  
39.33  
39.16  
39.00  
31.89  
31.86  
31.17  
31.16  
28.40  
26.94  
22.14  
13.89

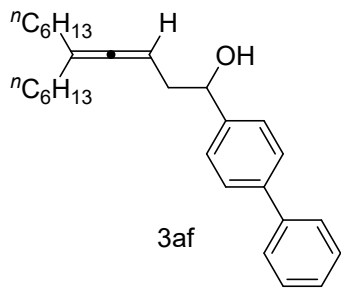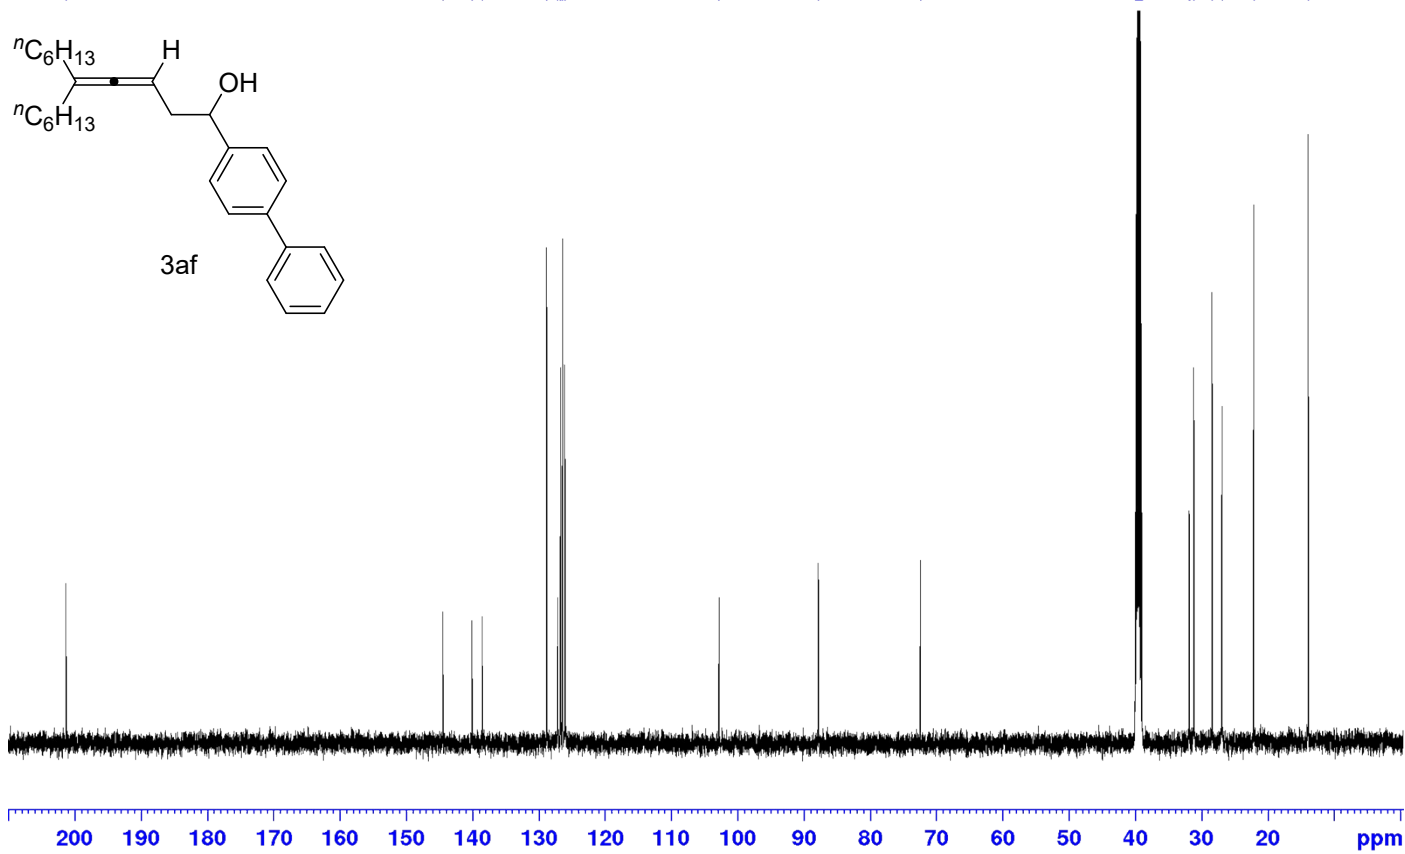

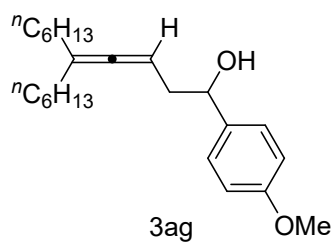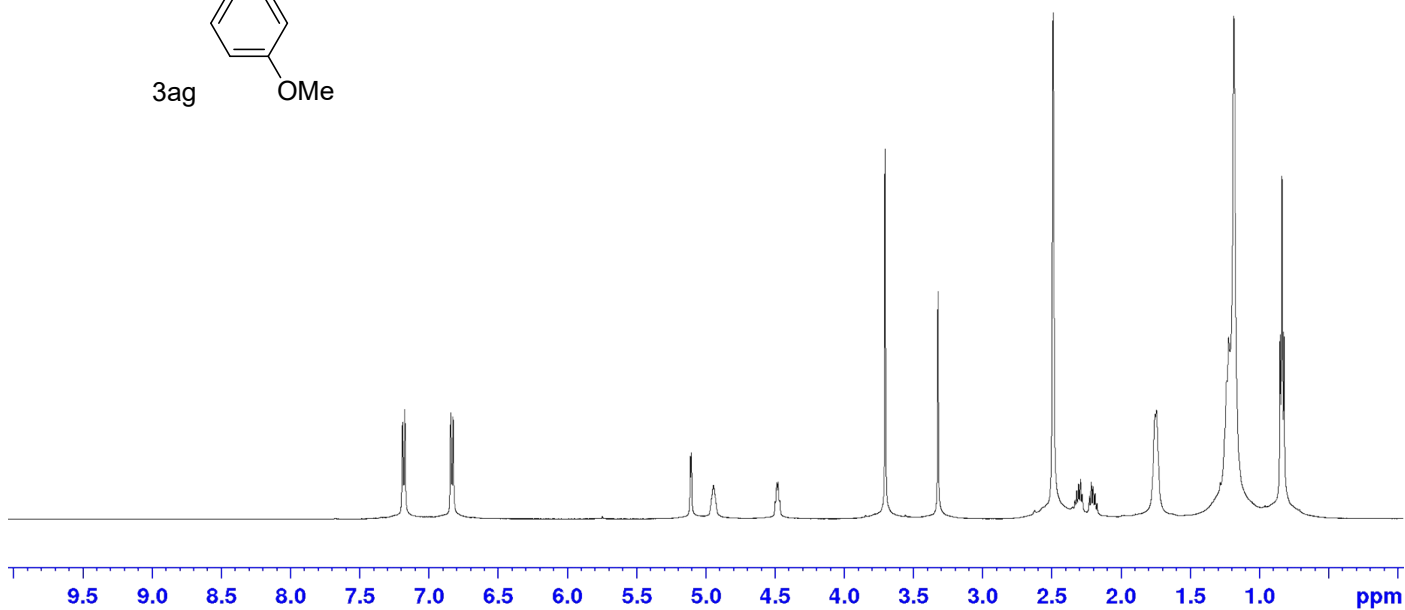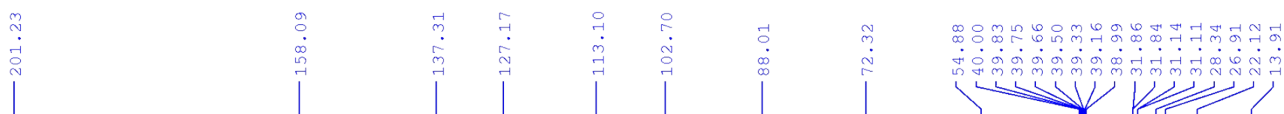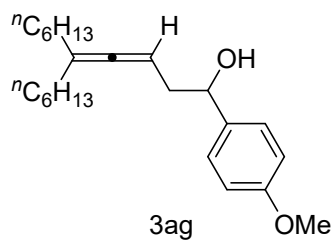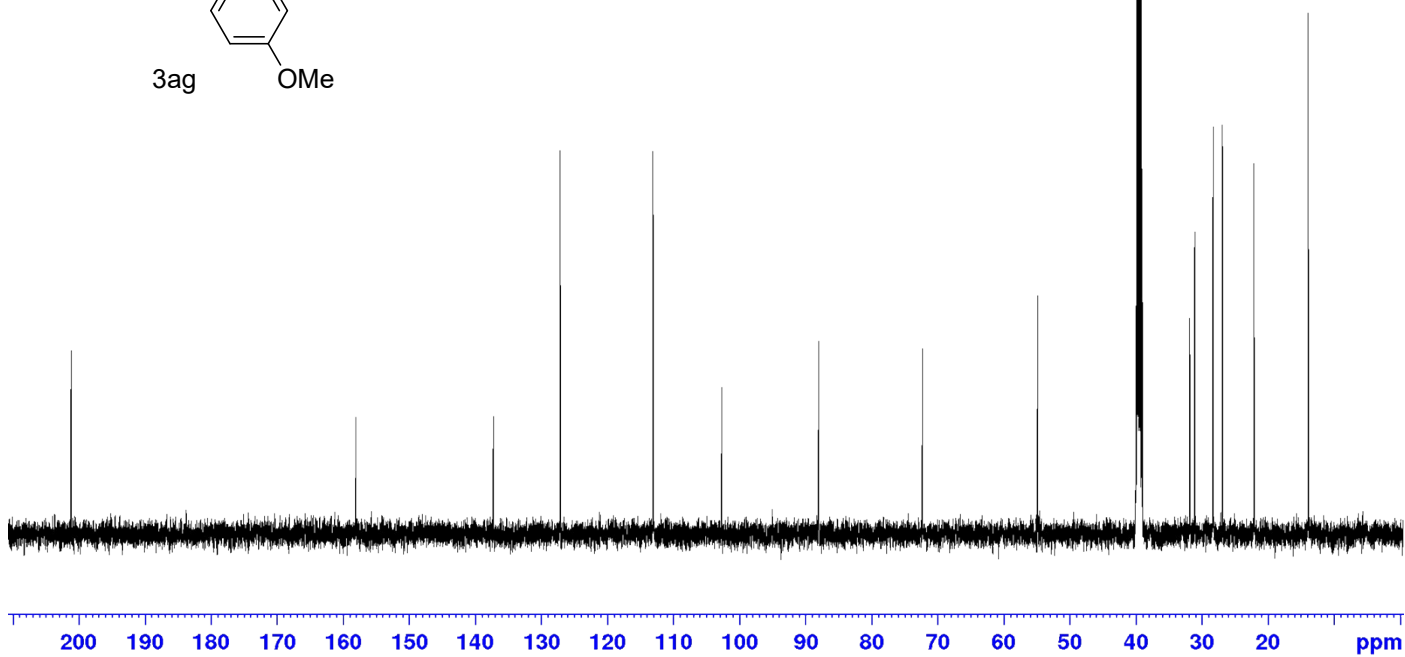

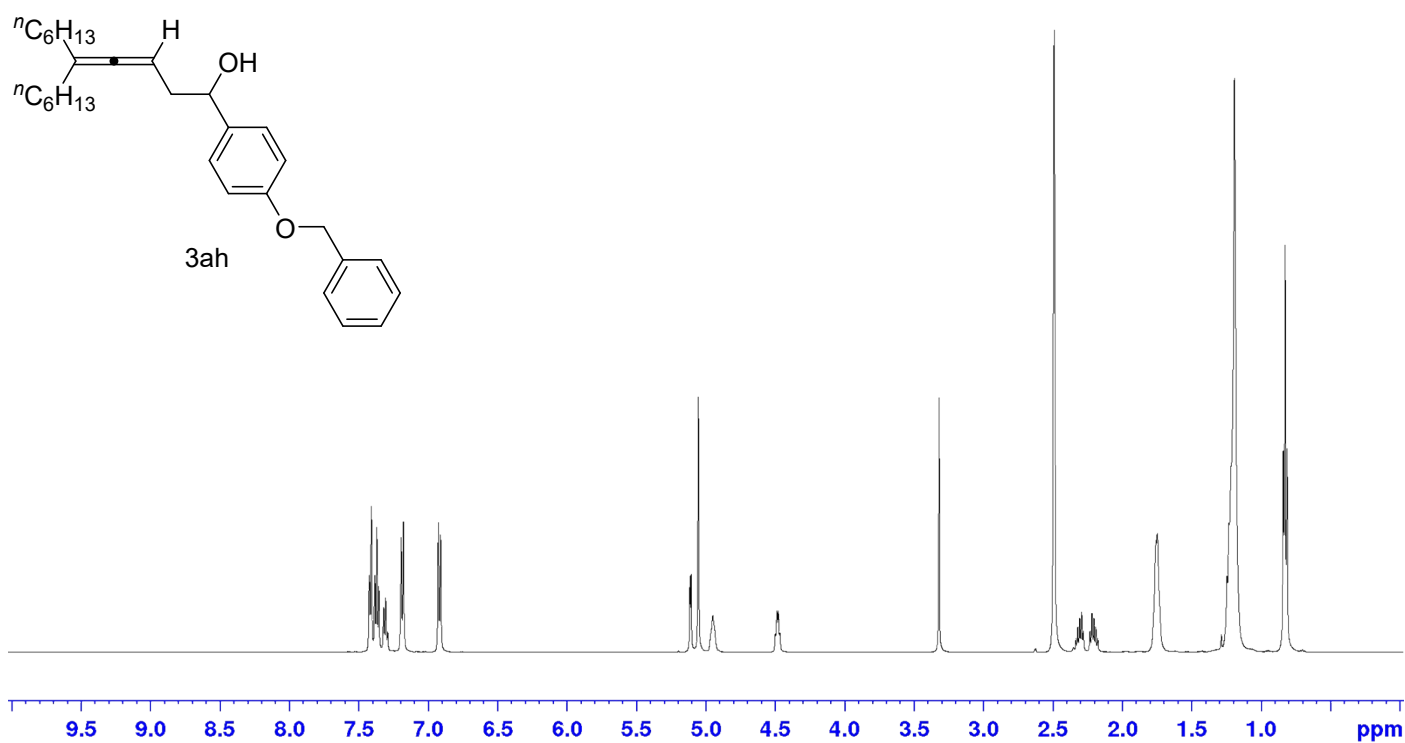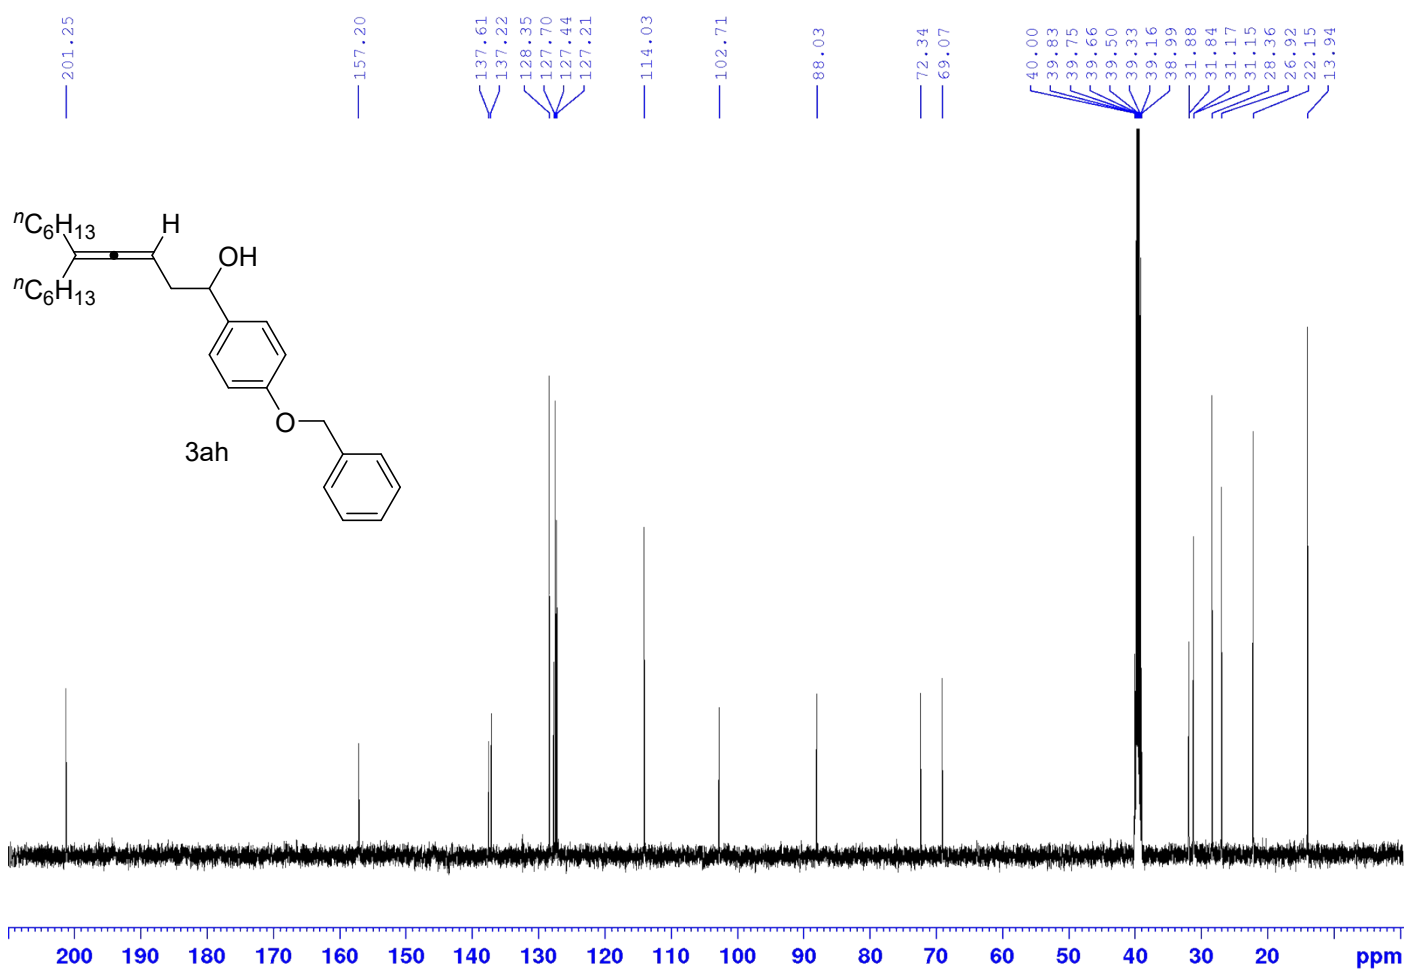



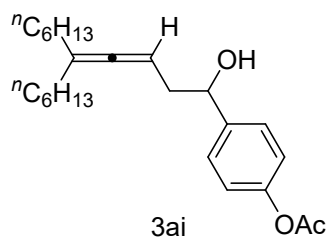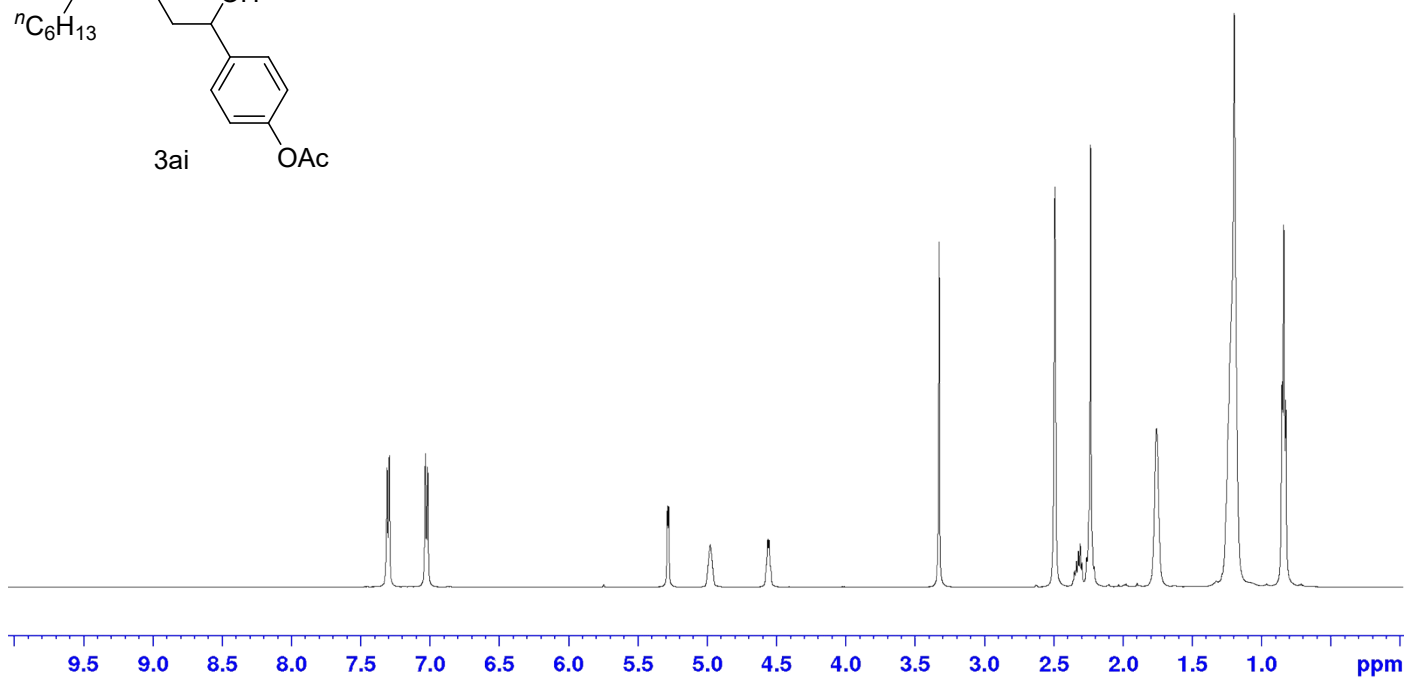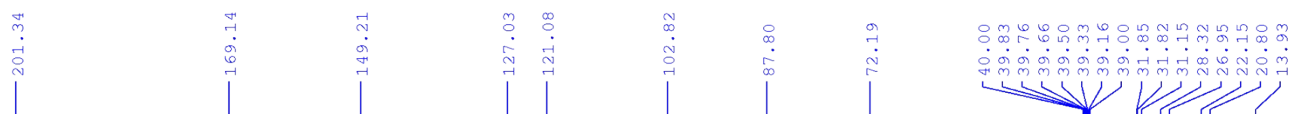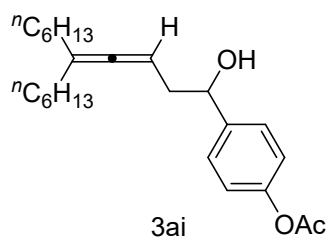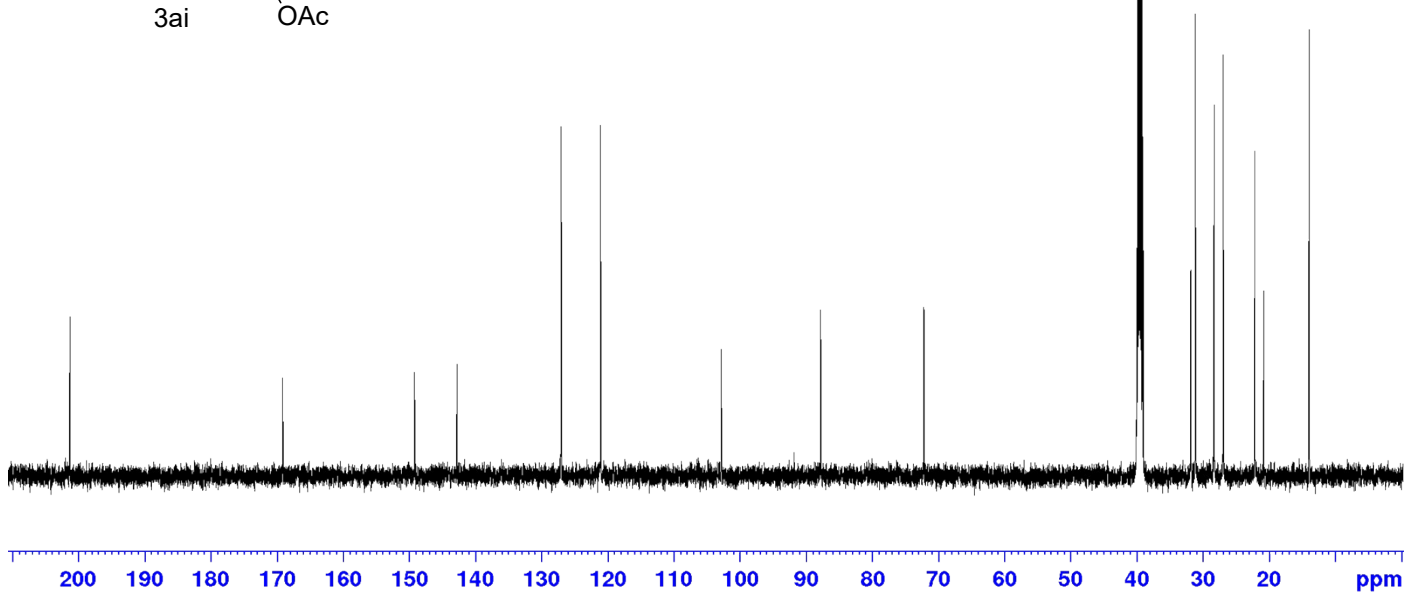

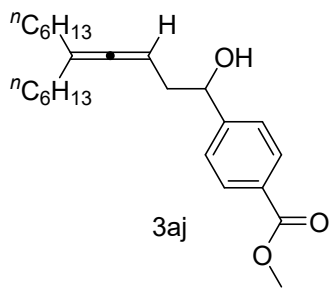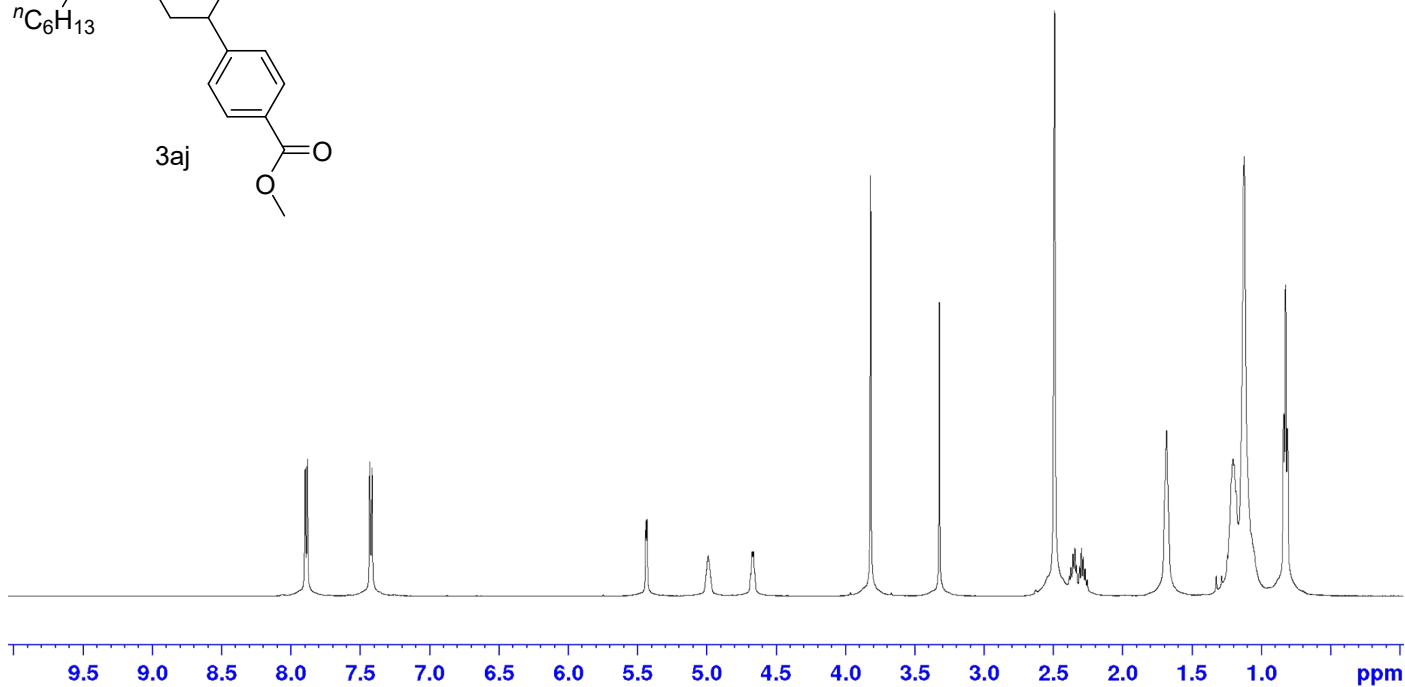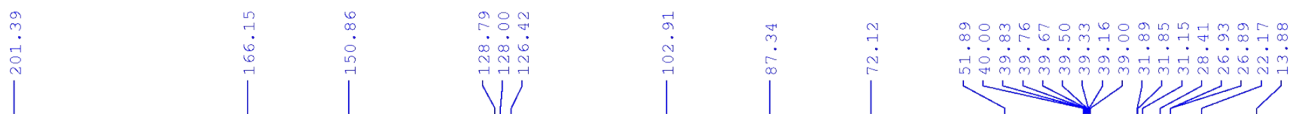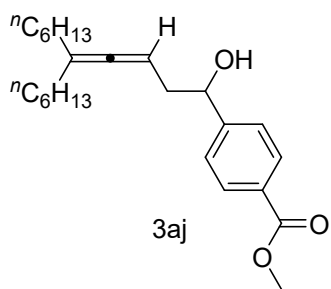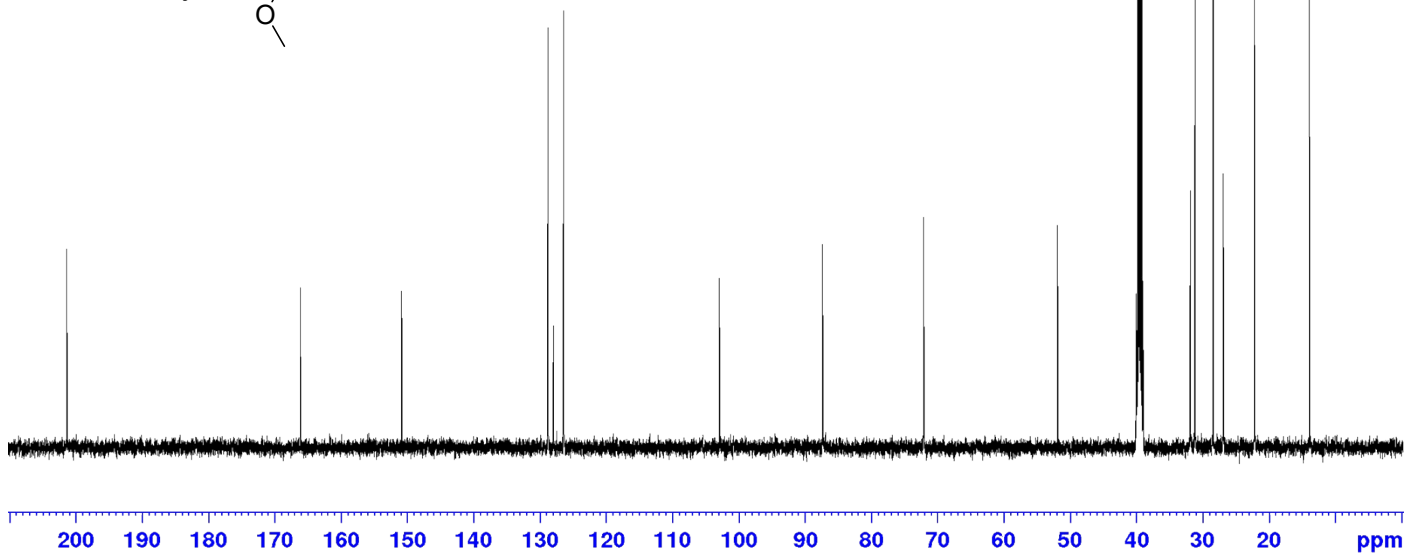

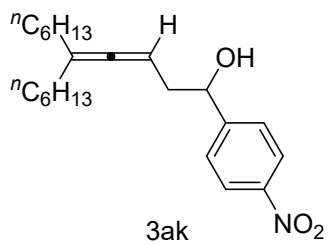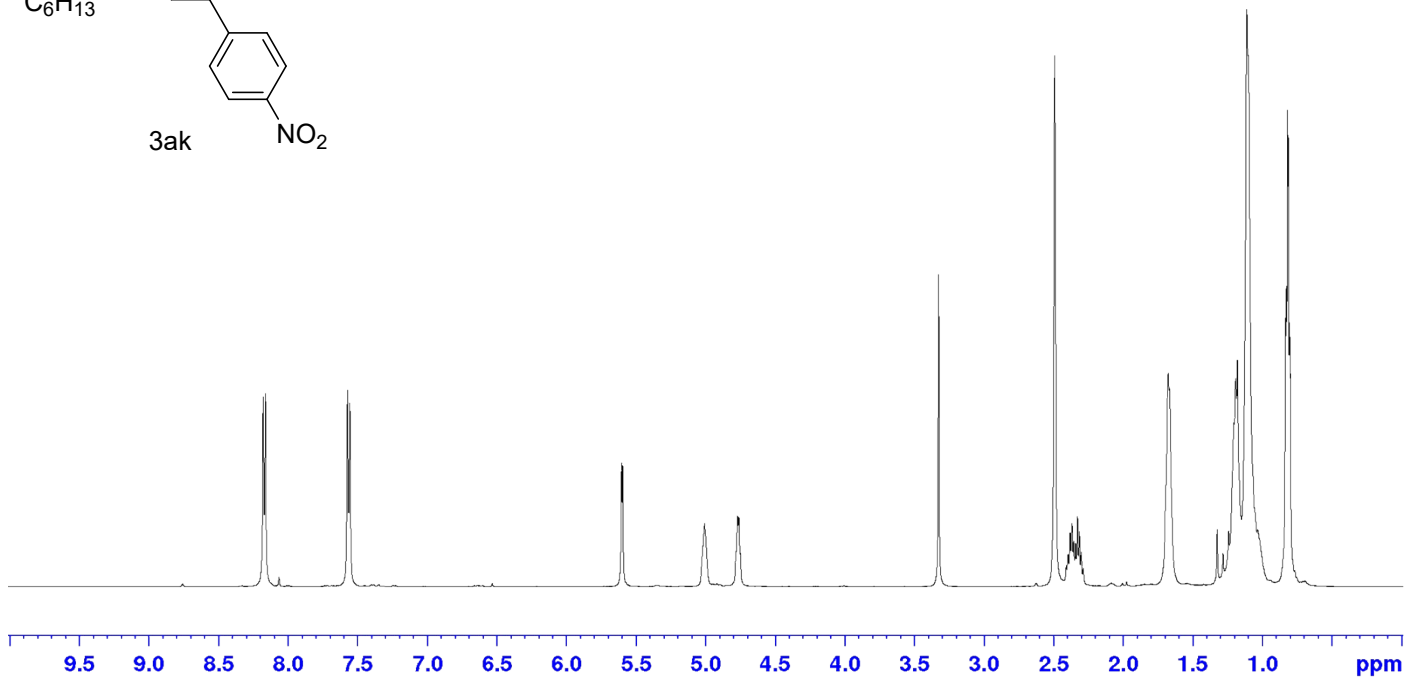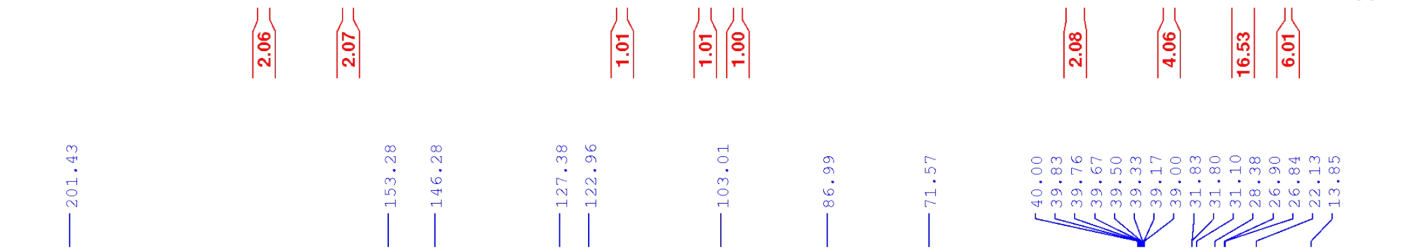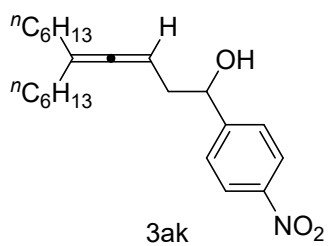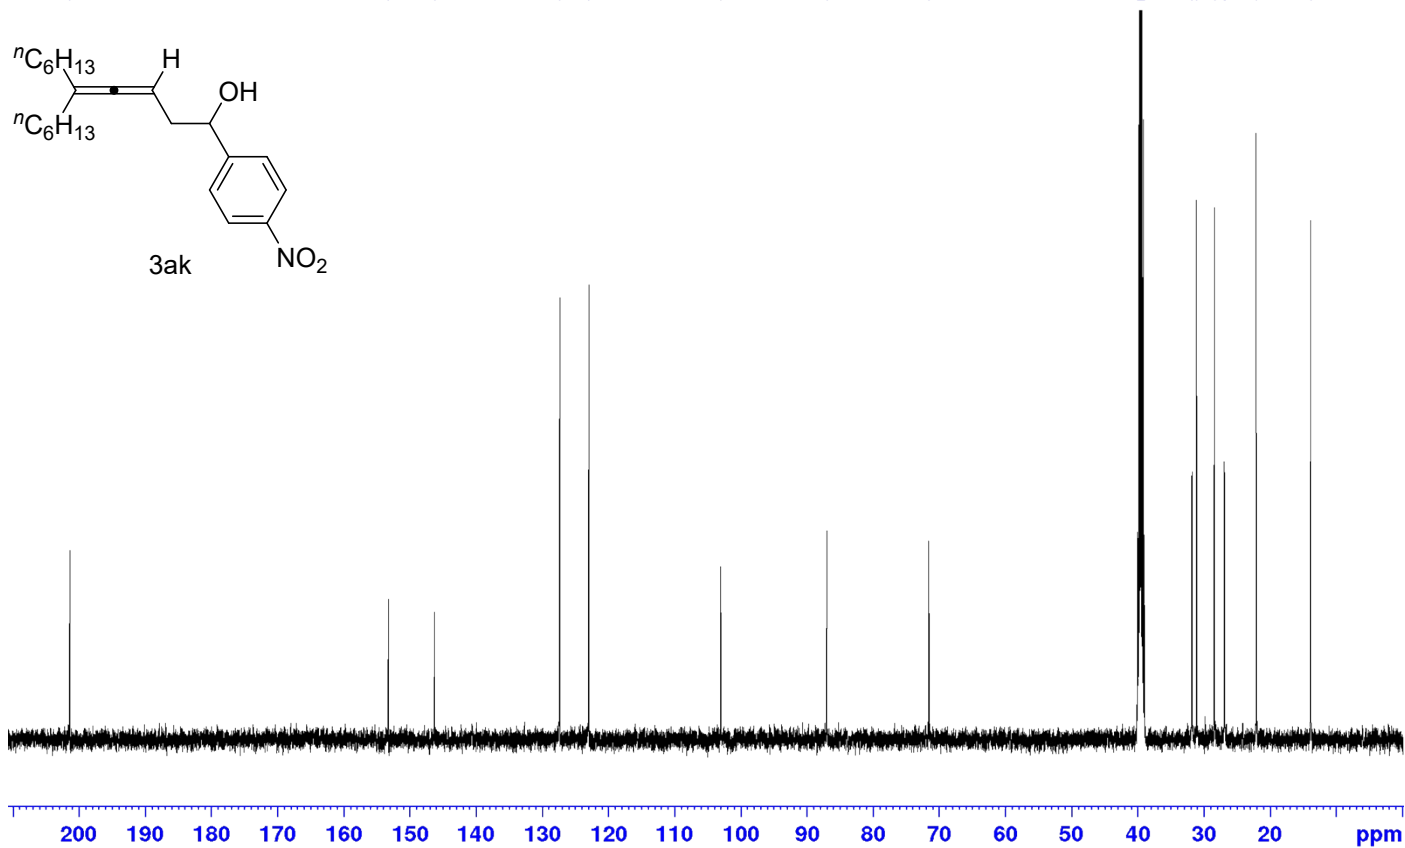

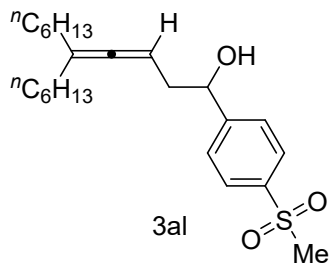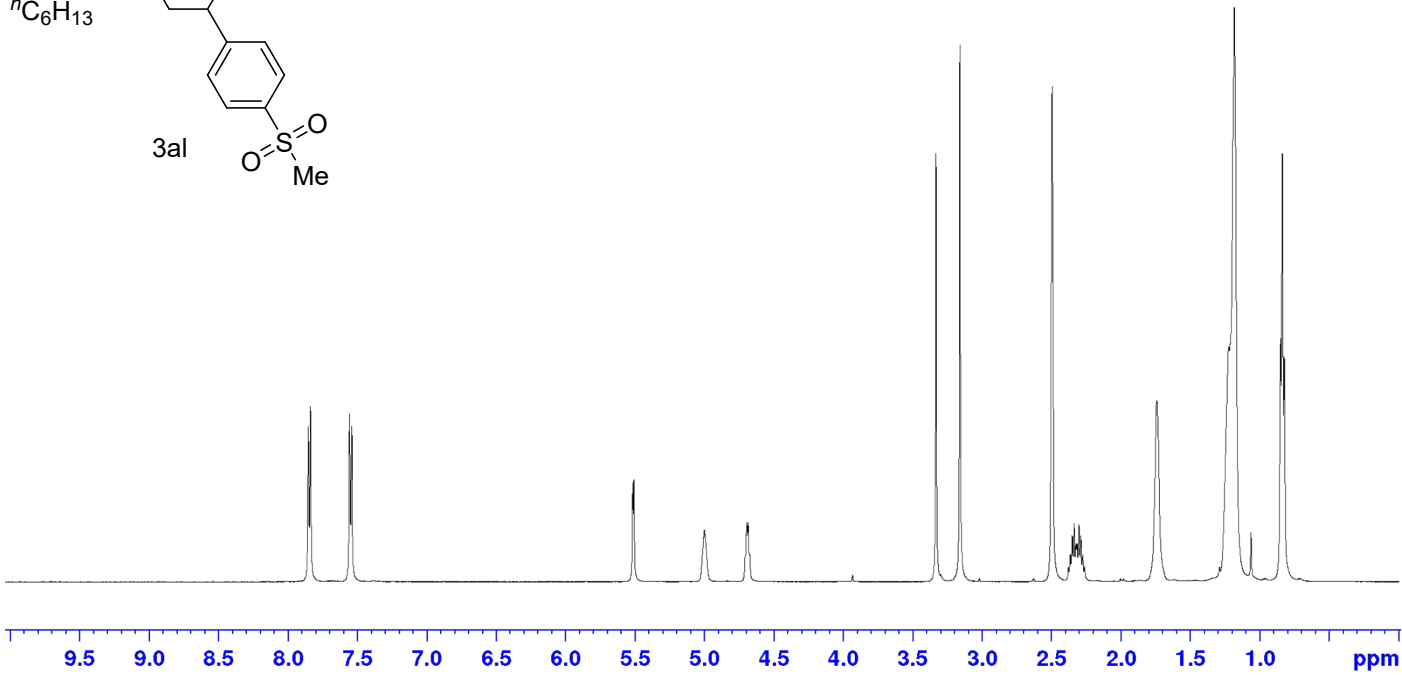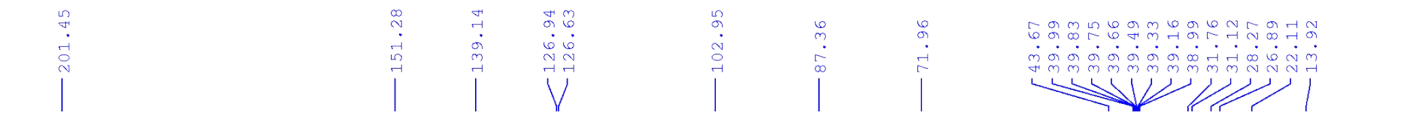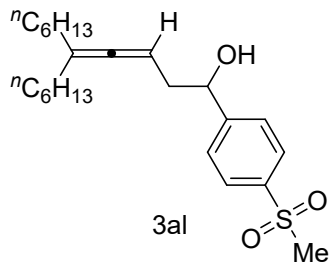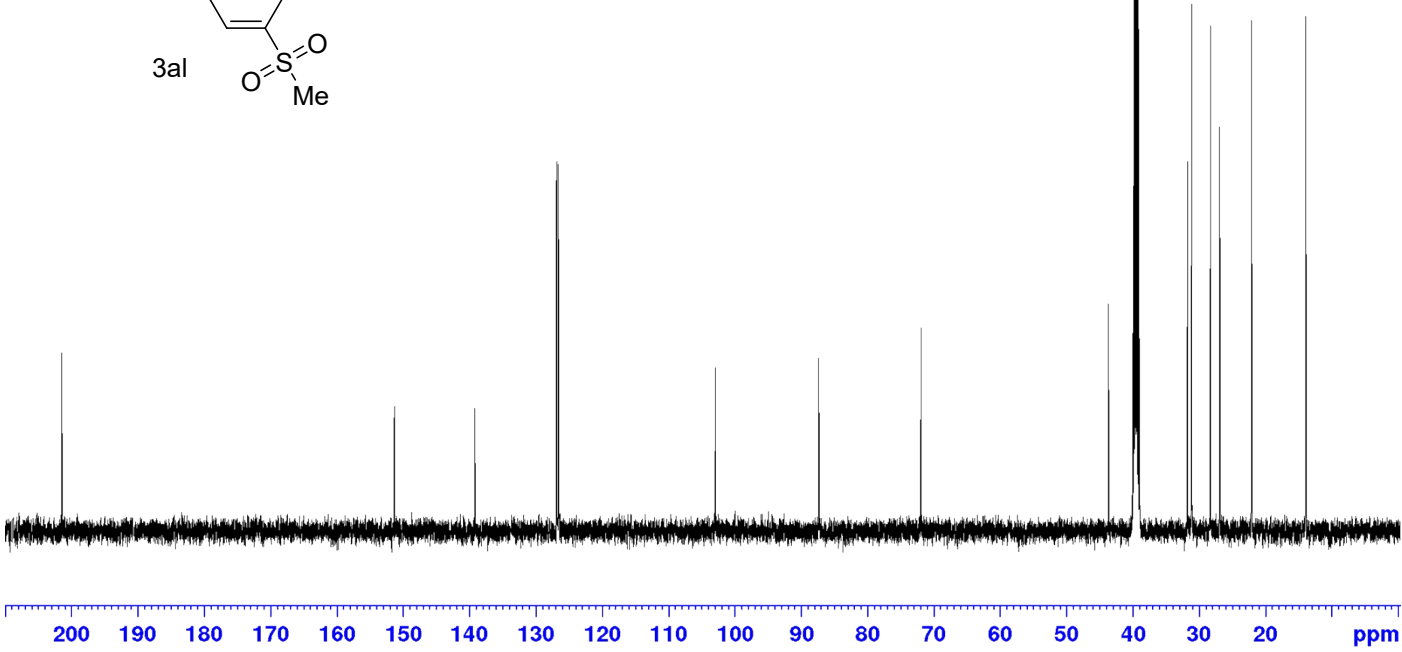

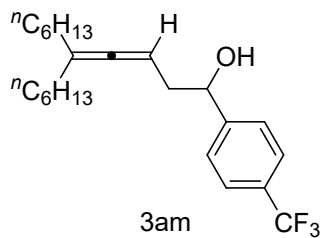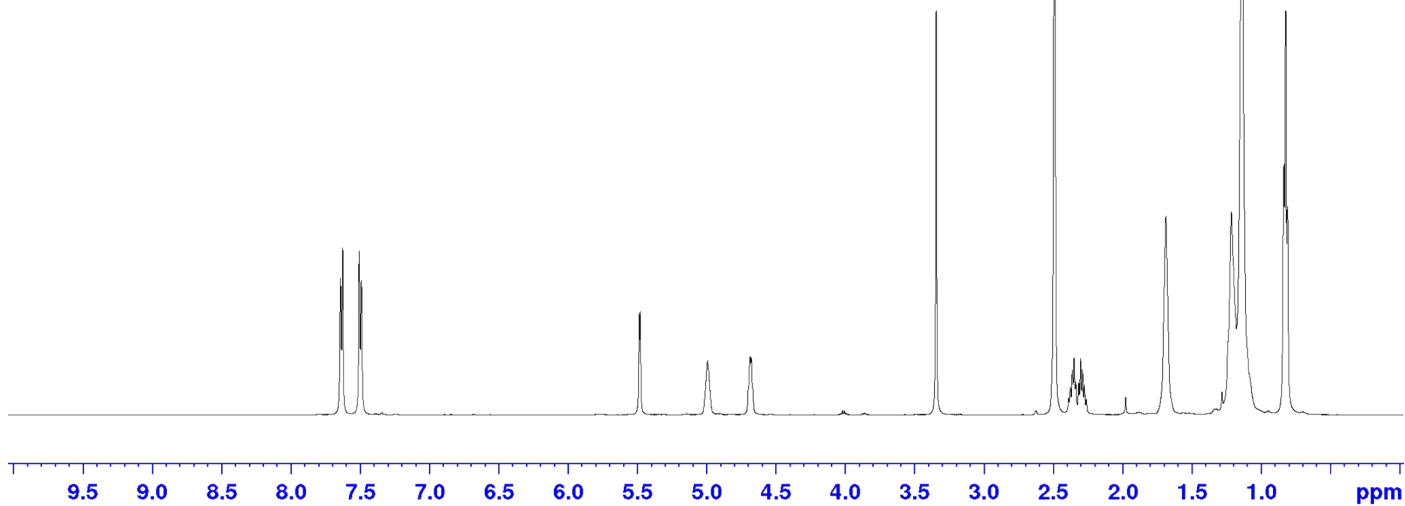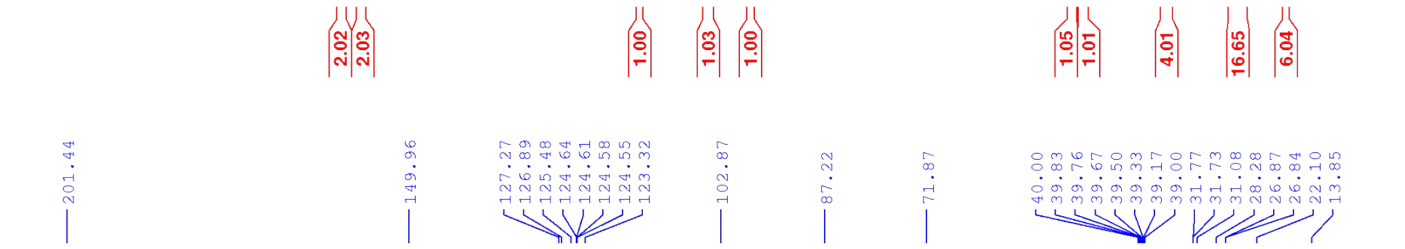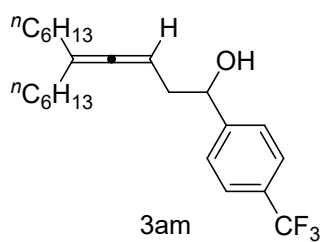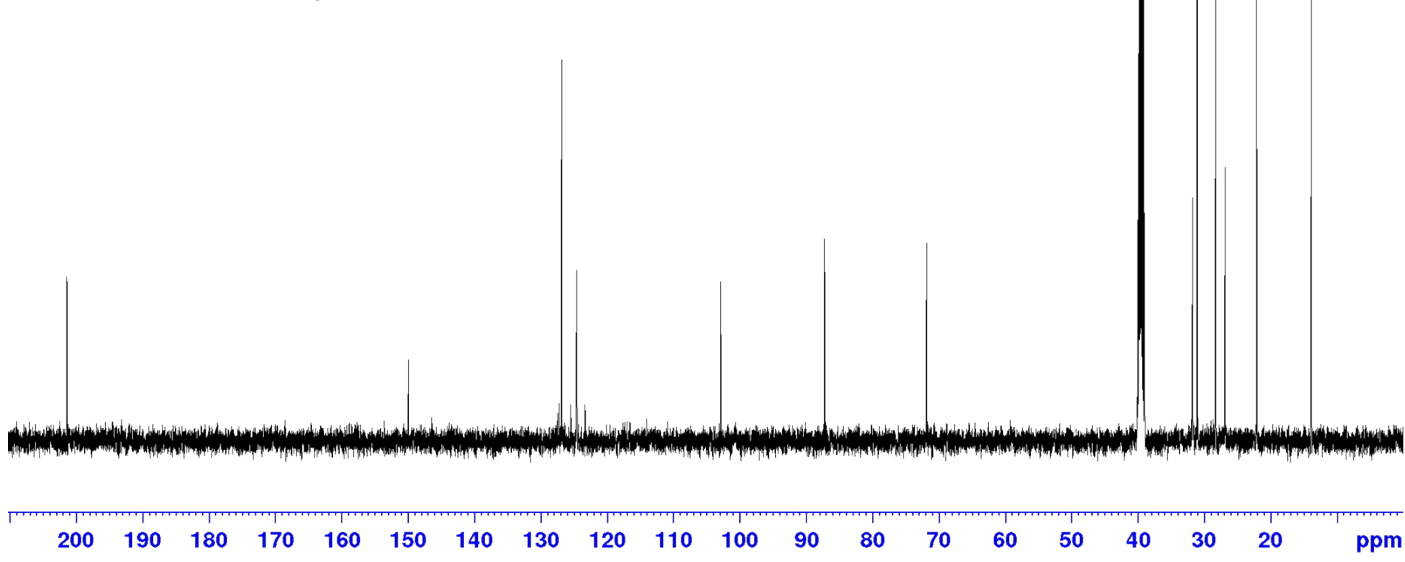

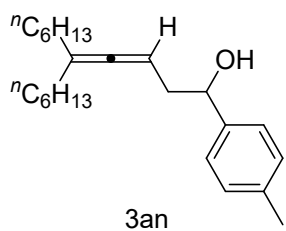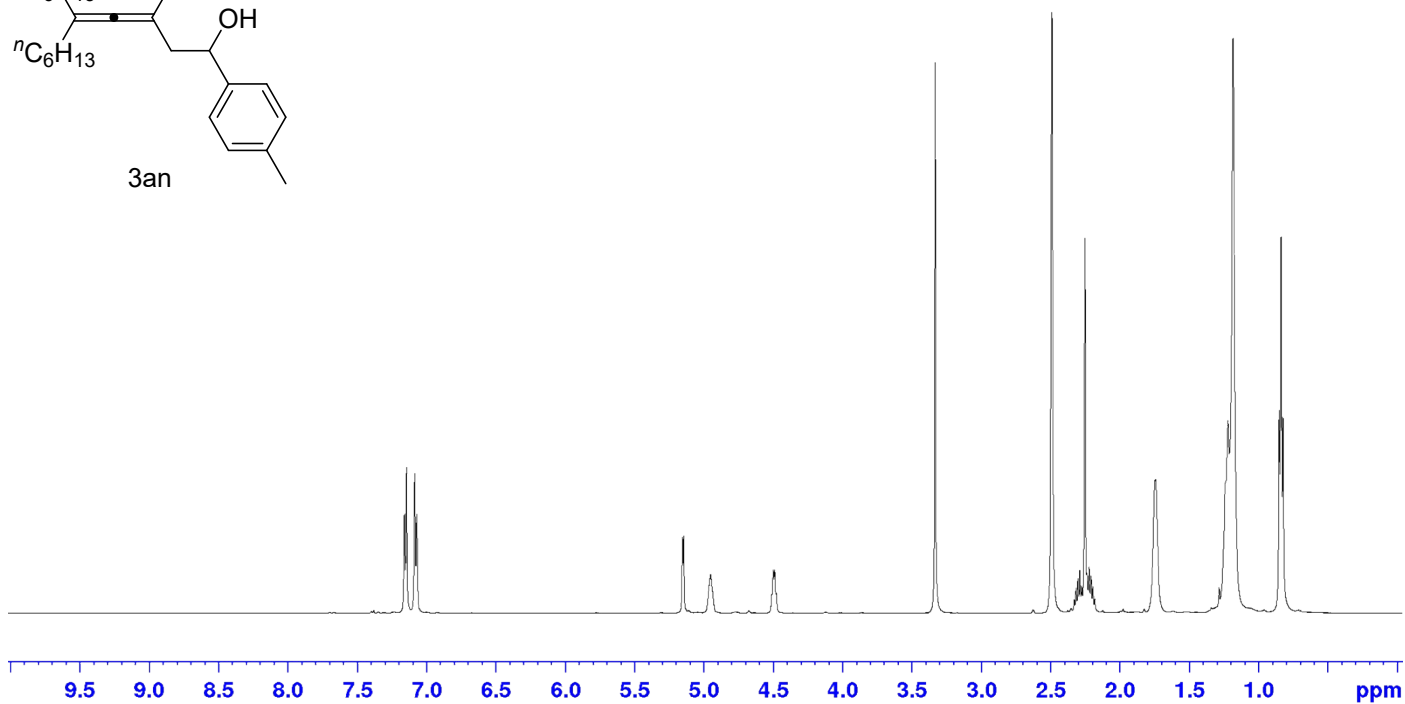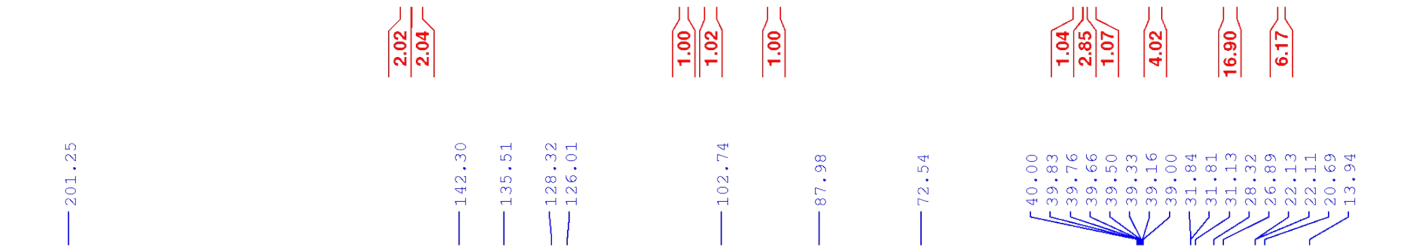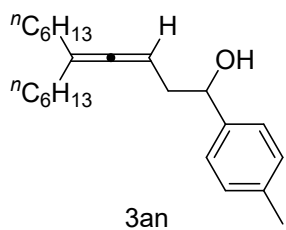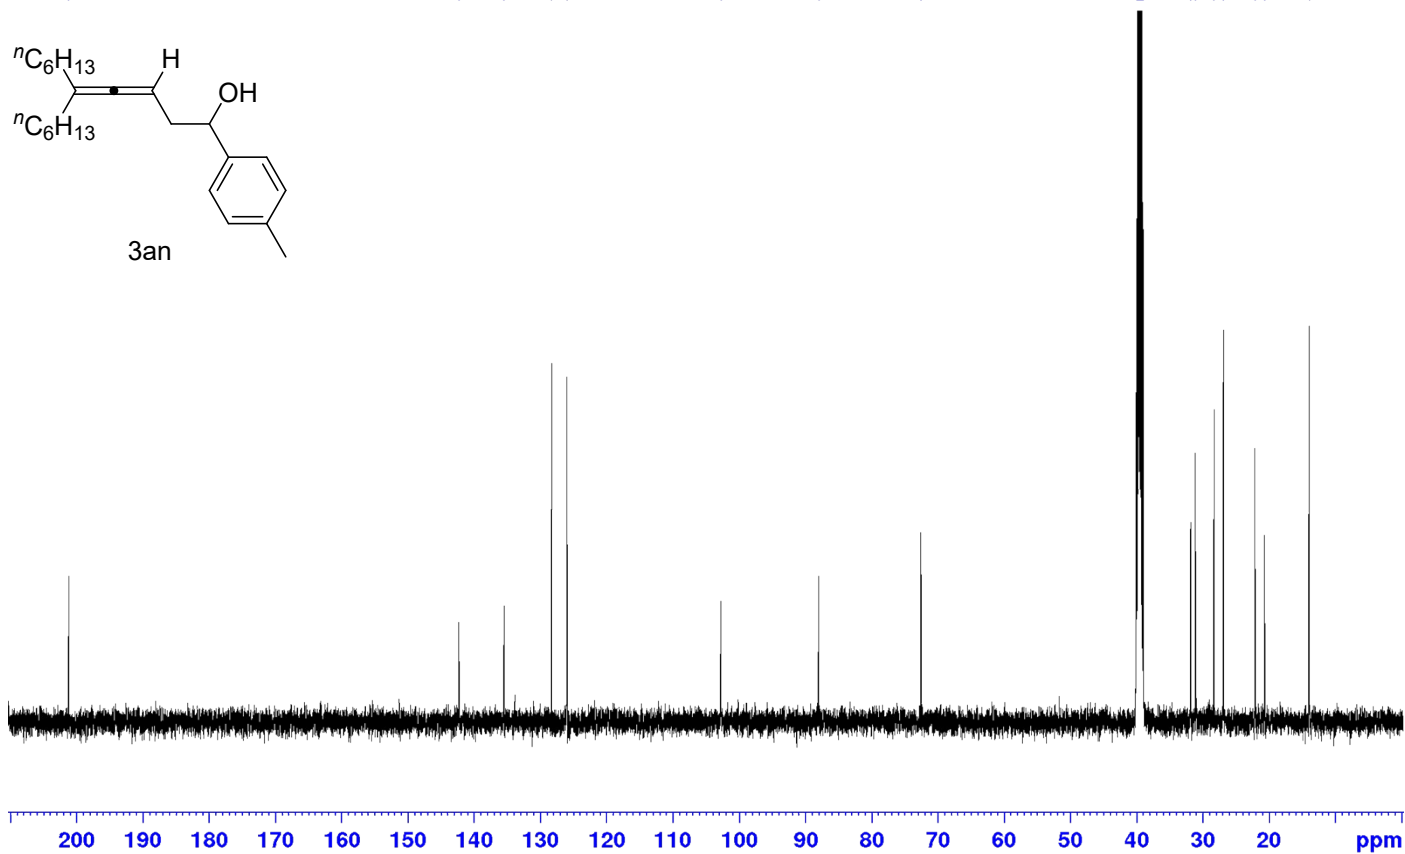

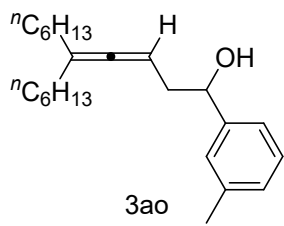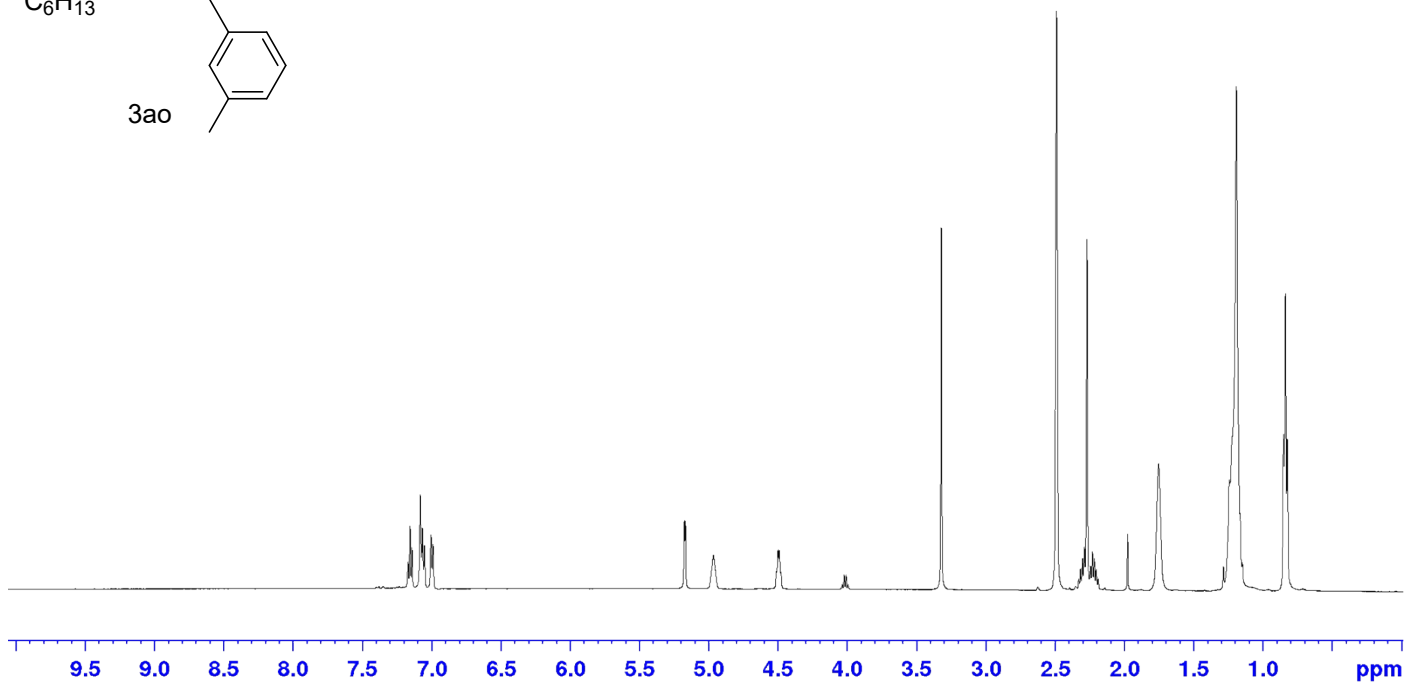

1.07  
2.05  
1.02

1.04  
1.05  
1.00

1.01  
3.00  
1.07

4.00  
16.67  
6.07

201.26

145.28

136.65

127.66

127.25

126.71

123.17

102.70

87.99

72.78

40.00  
39.83  
39.75  
39.66  
39.49  
39.33  
39.16  
38.99  
31.86  
31.83  
31.16  
28.33  
26.90  
22.15  
22.13  
21.09  
13.92

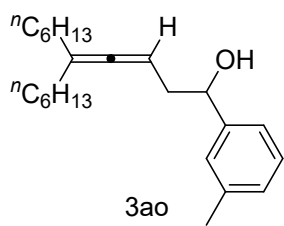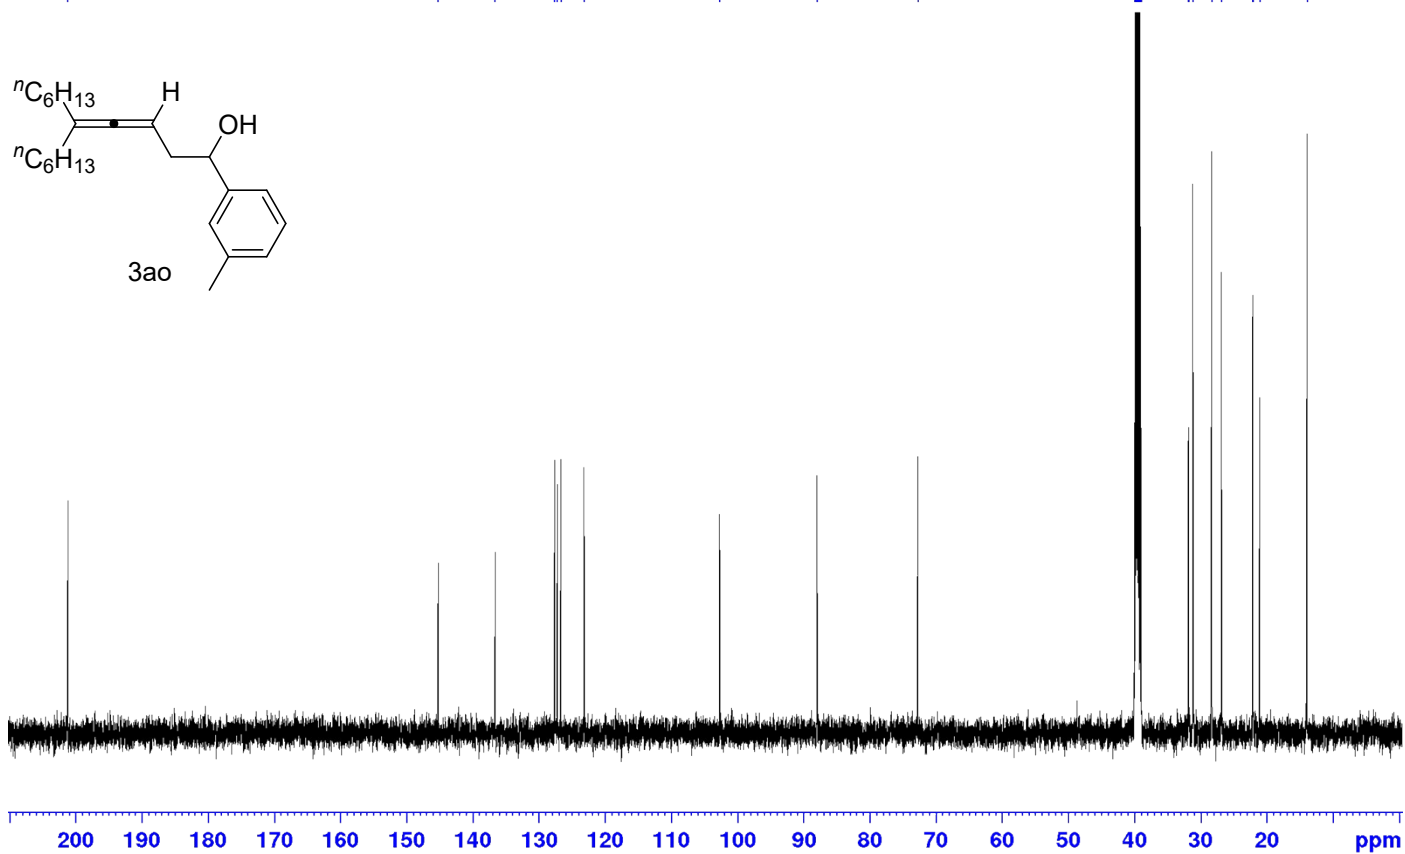

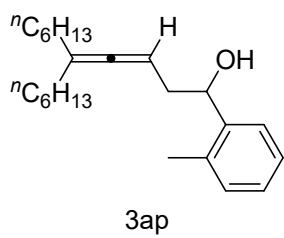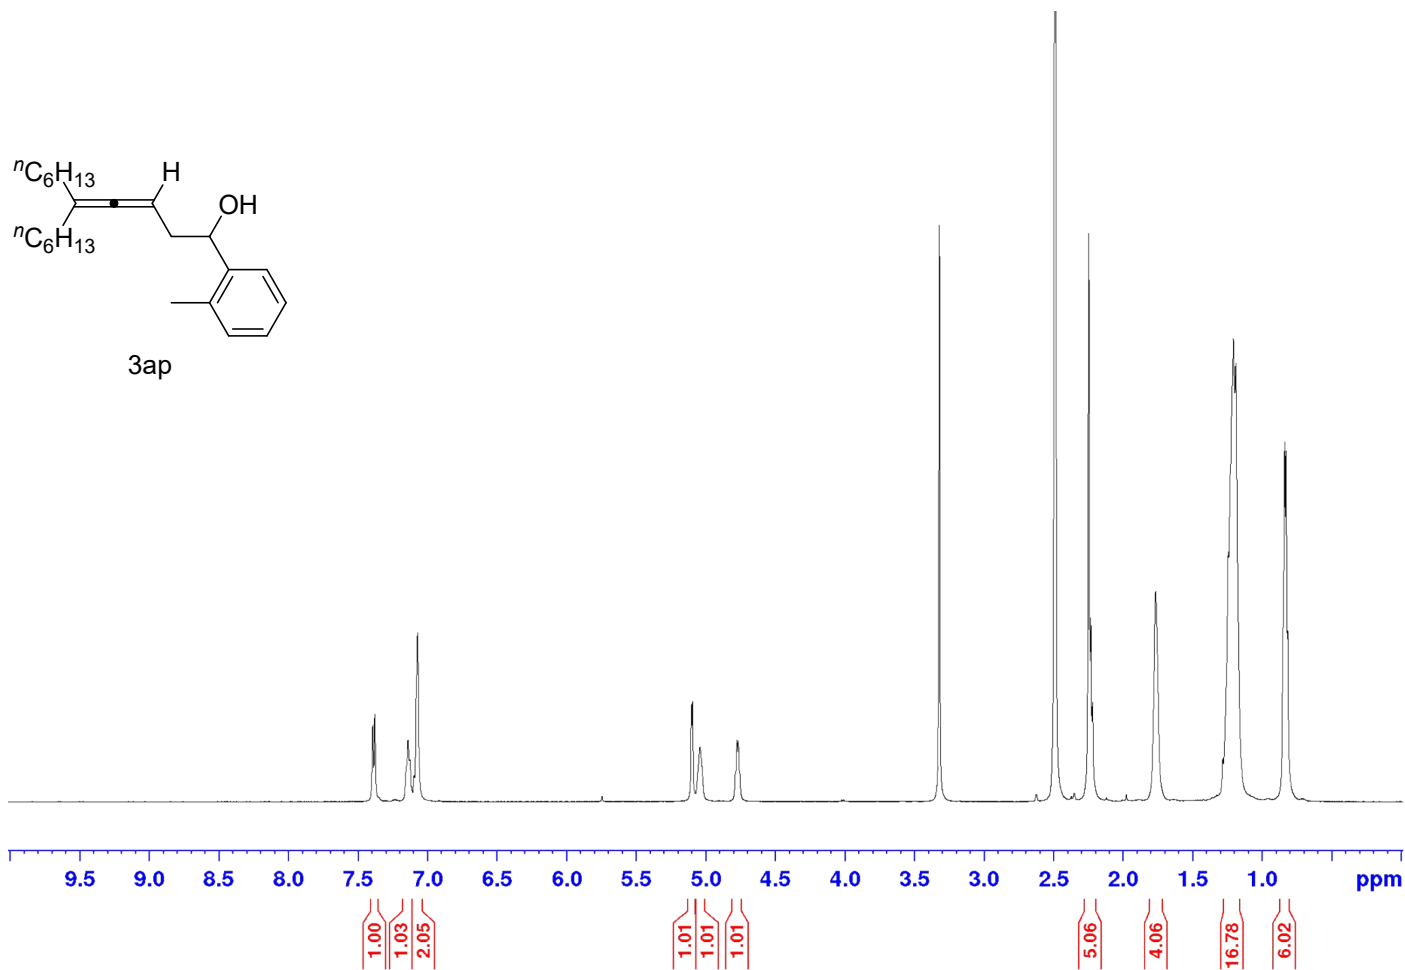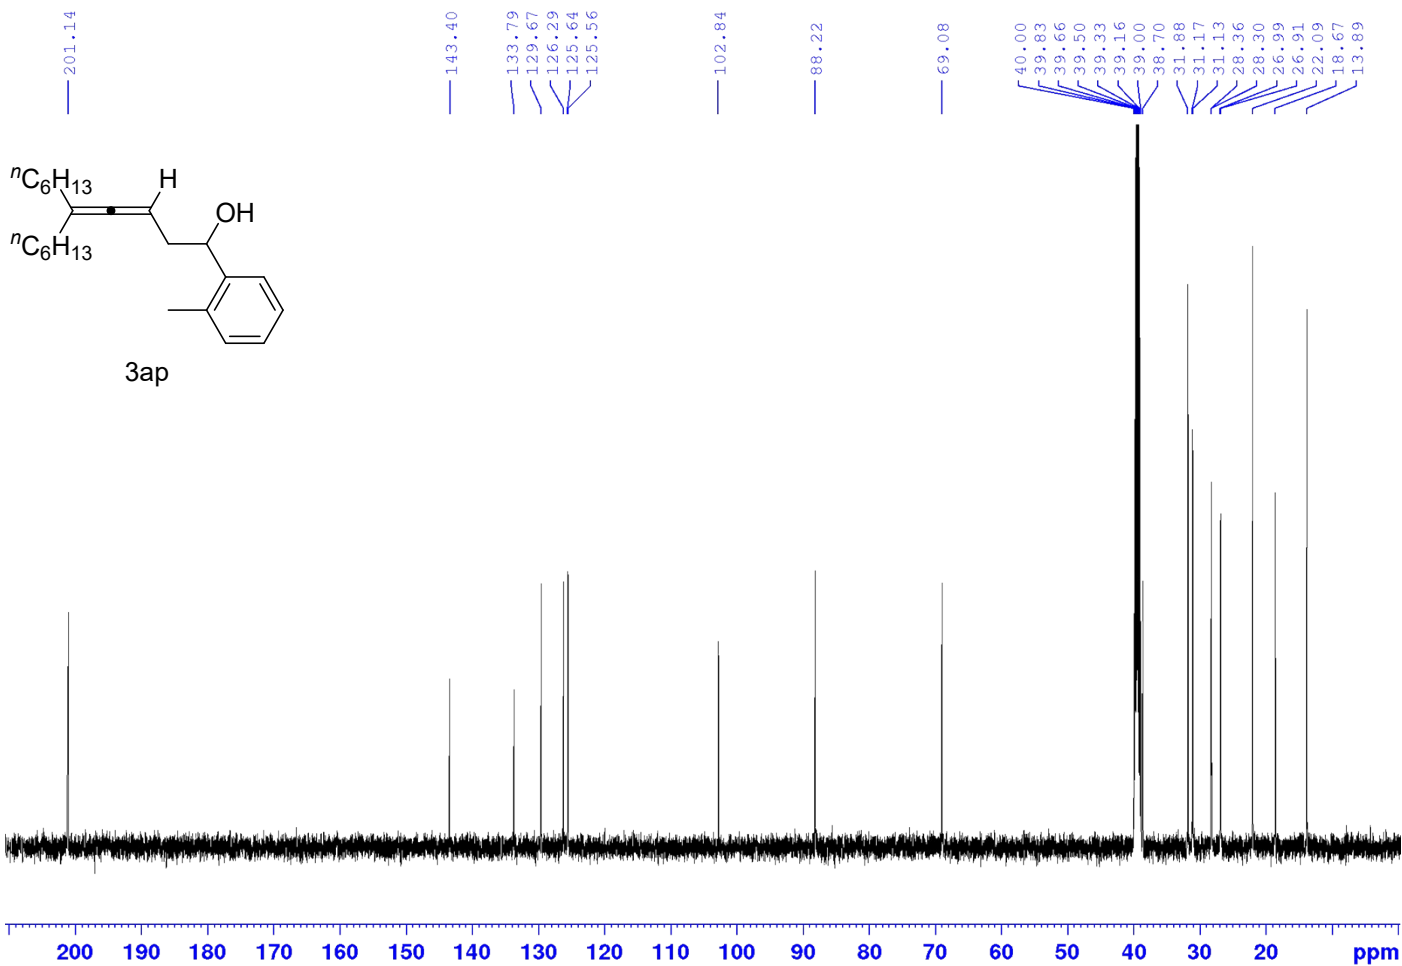



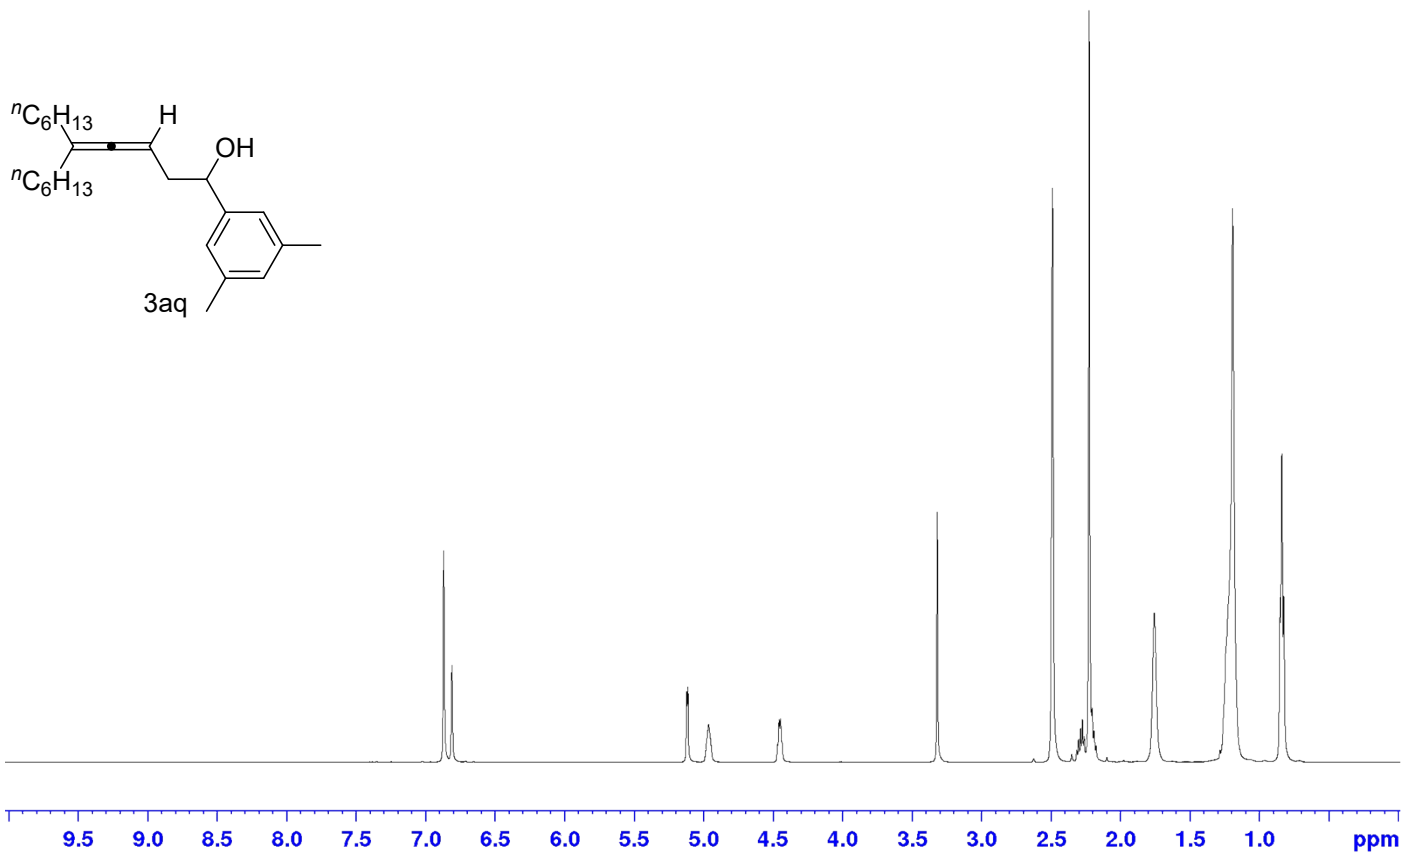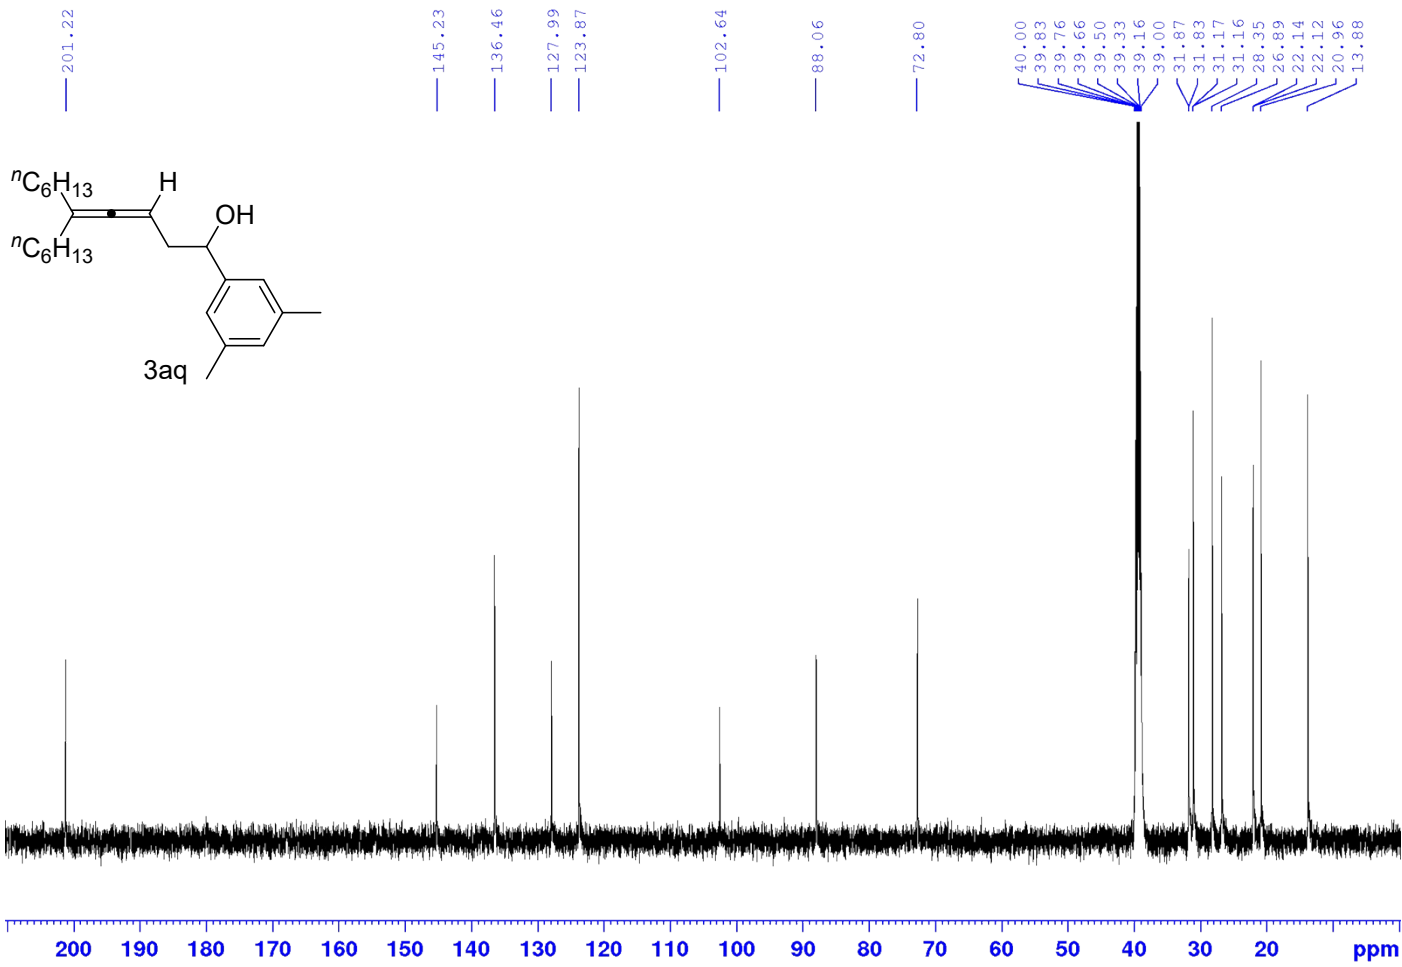

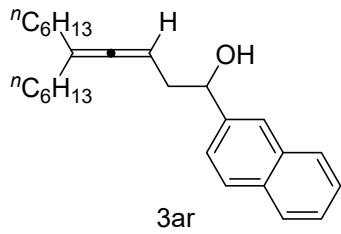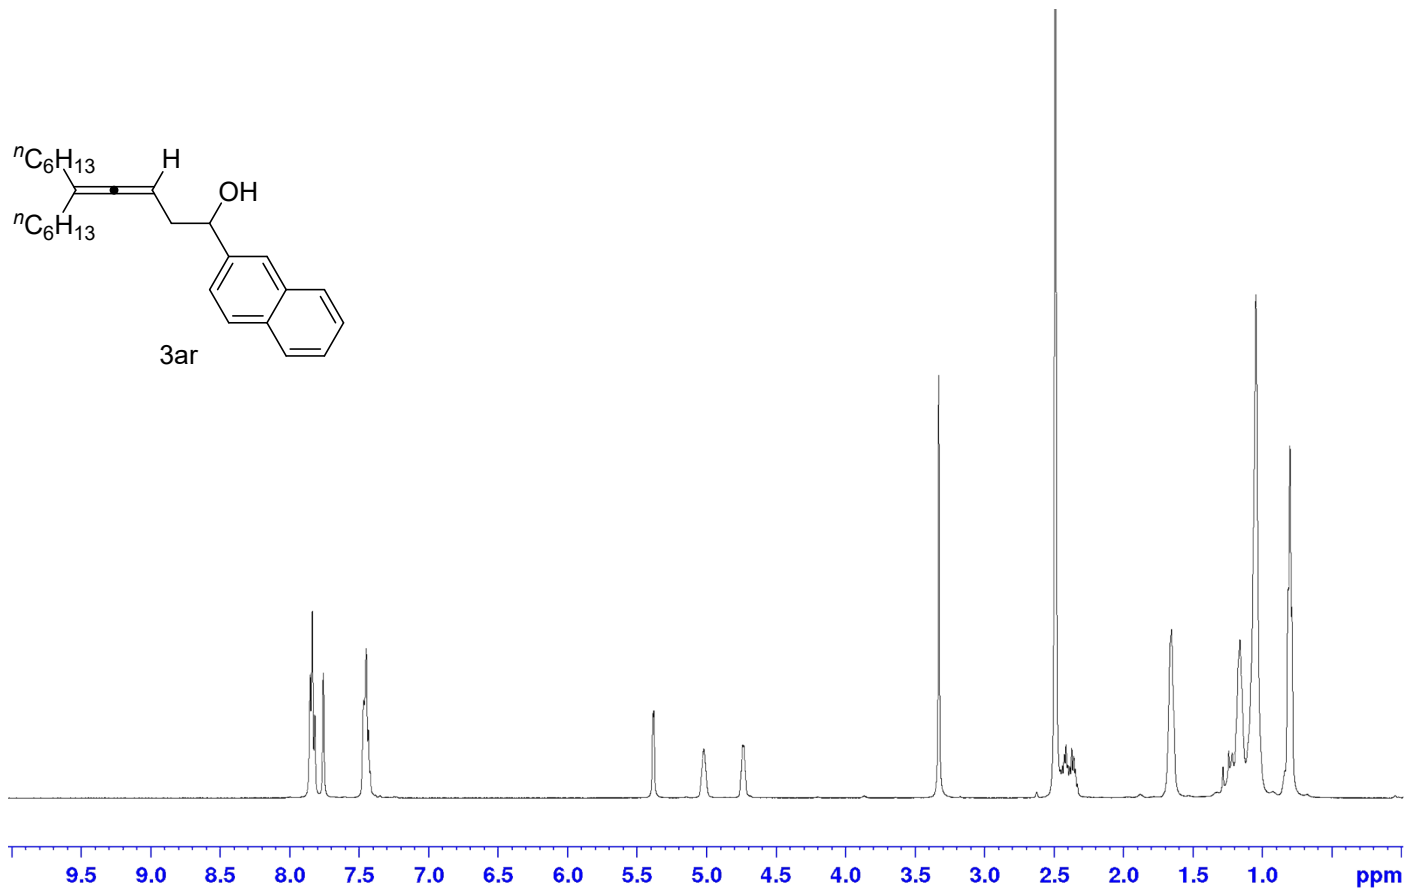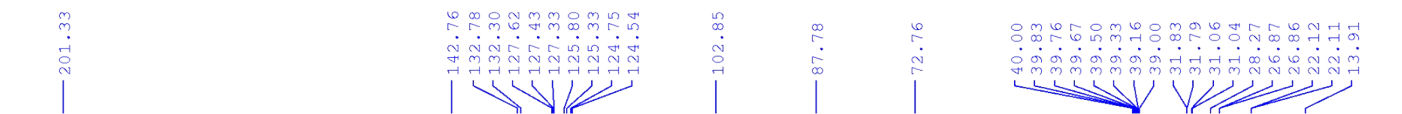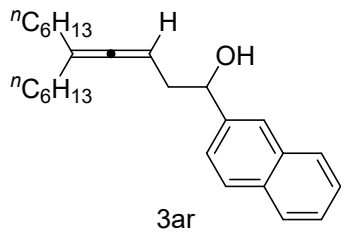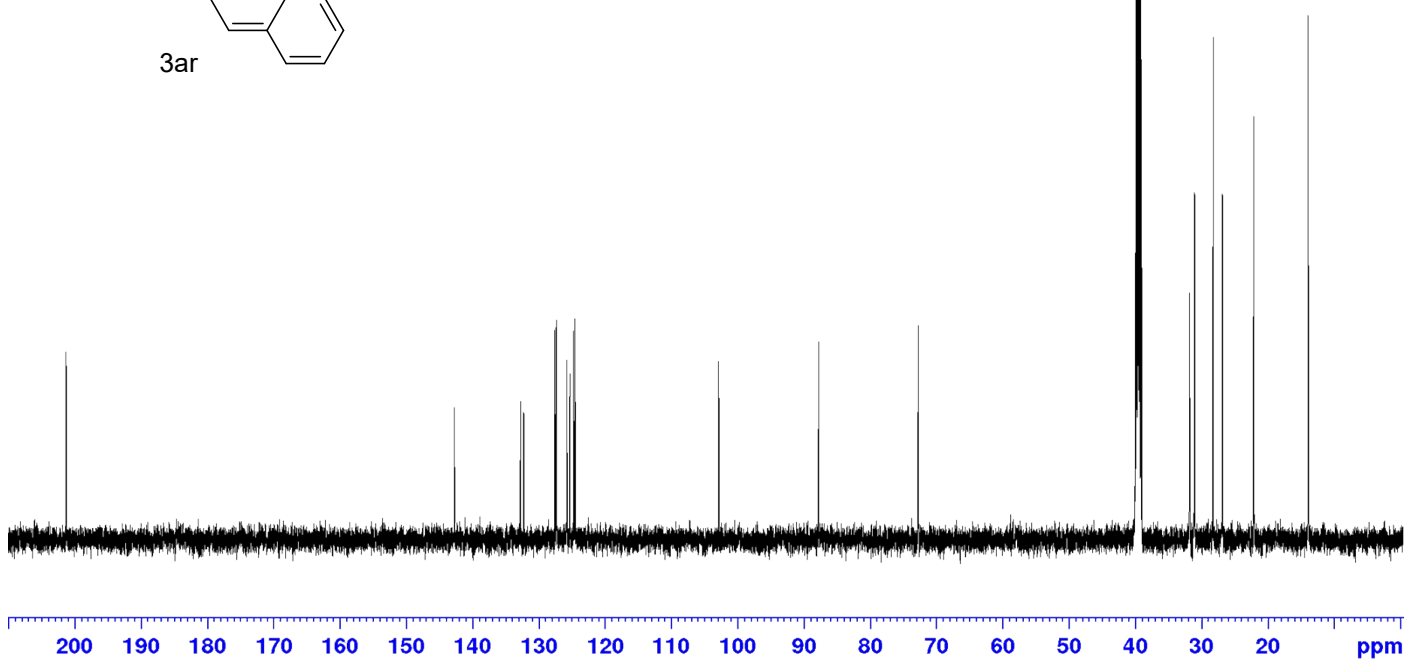

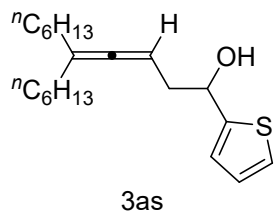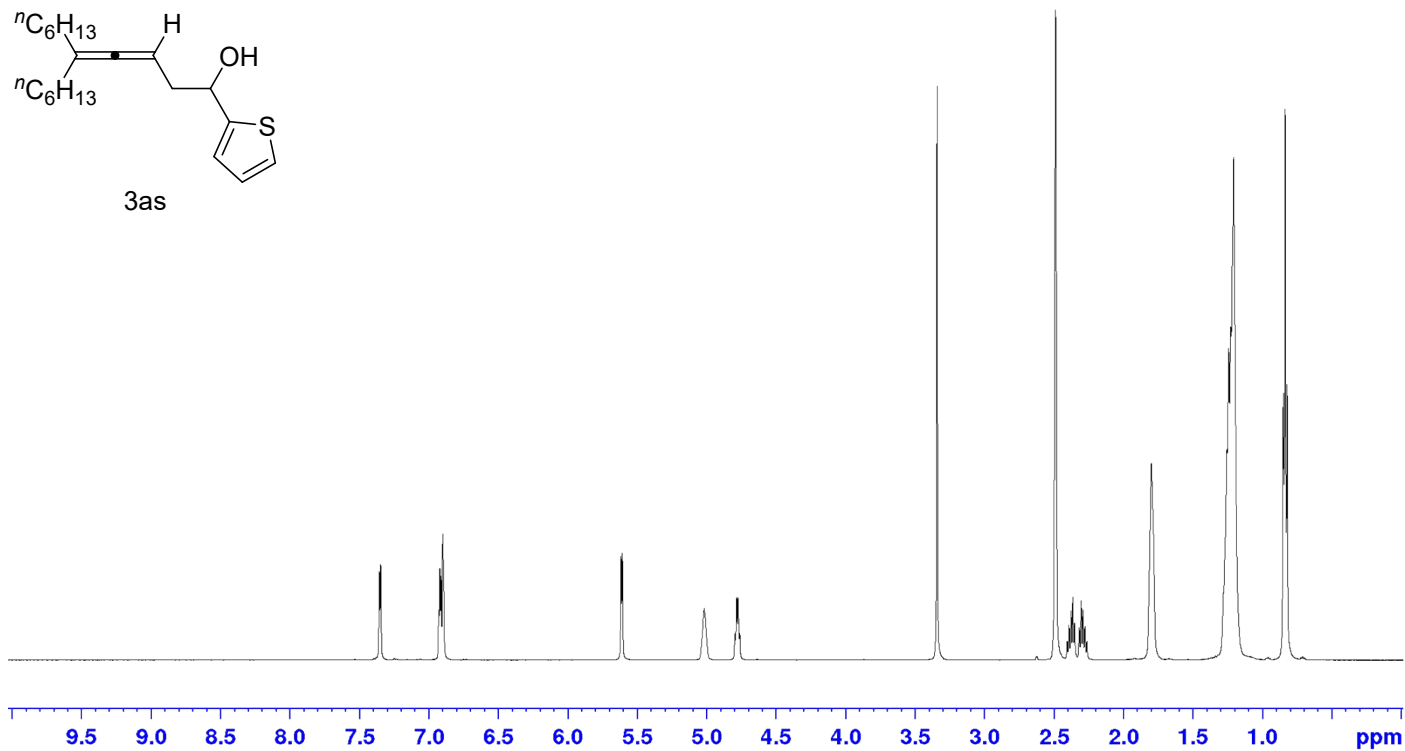

1.00  
 2.02  
 1.00  
 1.02  
 1.00  
 1.07  
 1.03  
 4.07  
 16.79  
 6.08

201.37  
 149.78  
 126.23  
 123.97  
 123.00  
 103.03  
 87.70  
 68.79  
 39.99  
 39.83  
 39.76  
 39.66  
 39.49  
 39.33  
 39.16  
 38.99  
 31.85  
 31.82  
 31.15  
 28.33  
 28.33  
 26.92  
 22.11  
 13.92

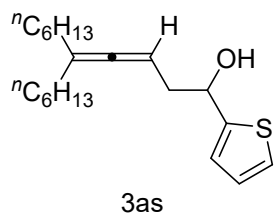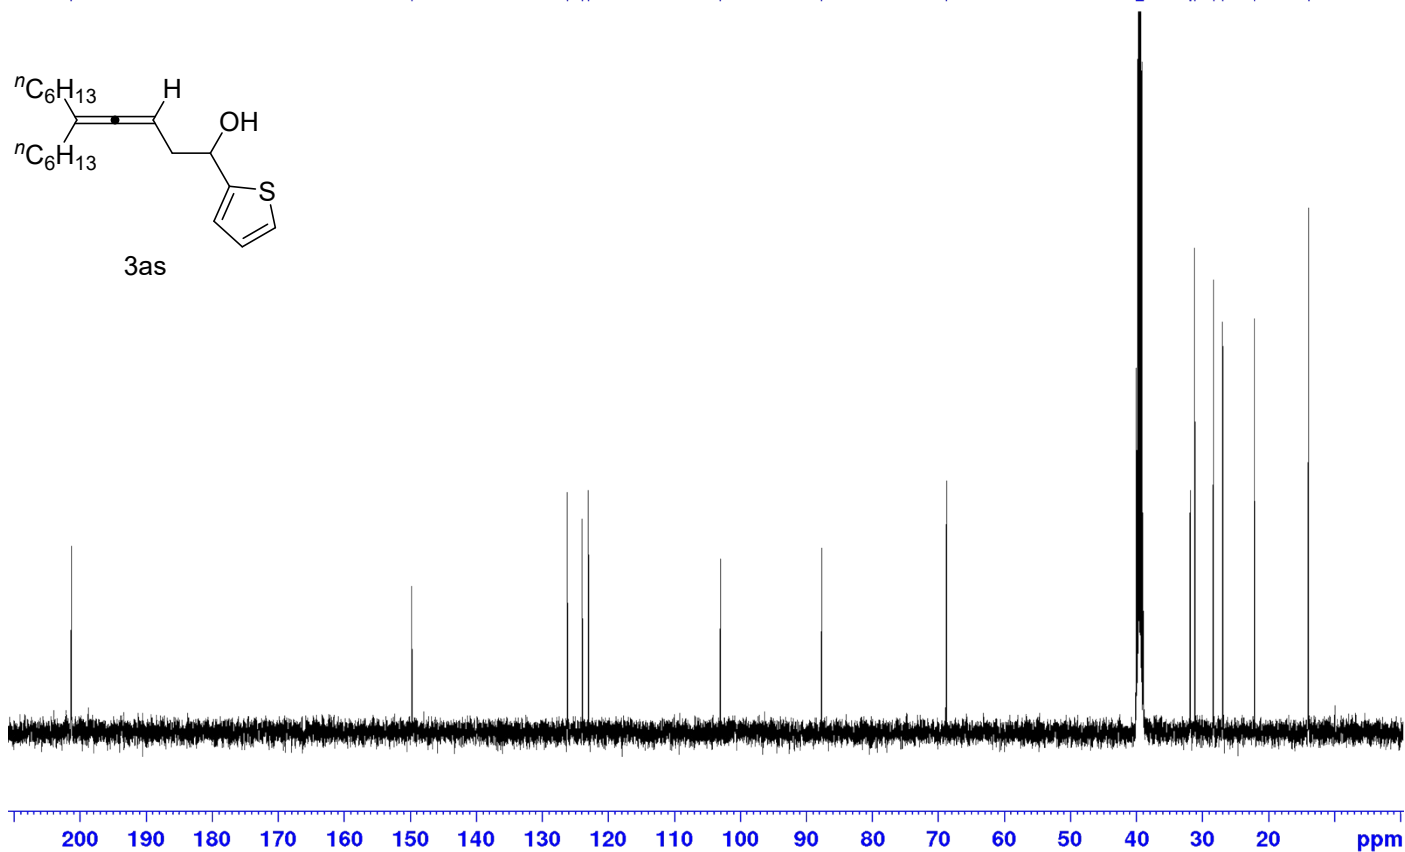

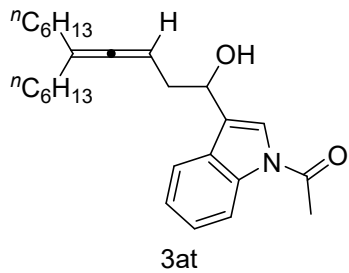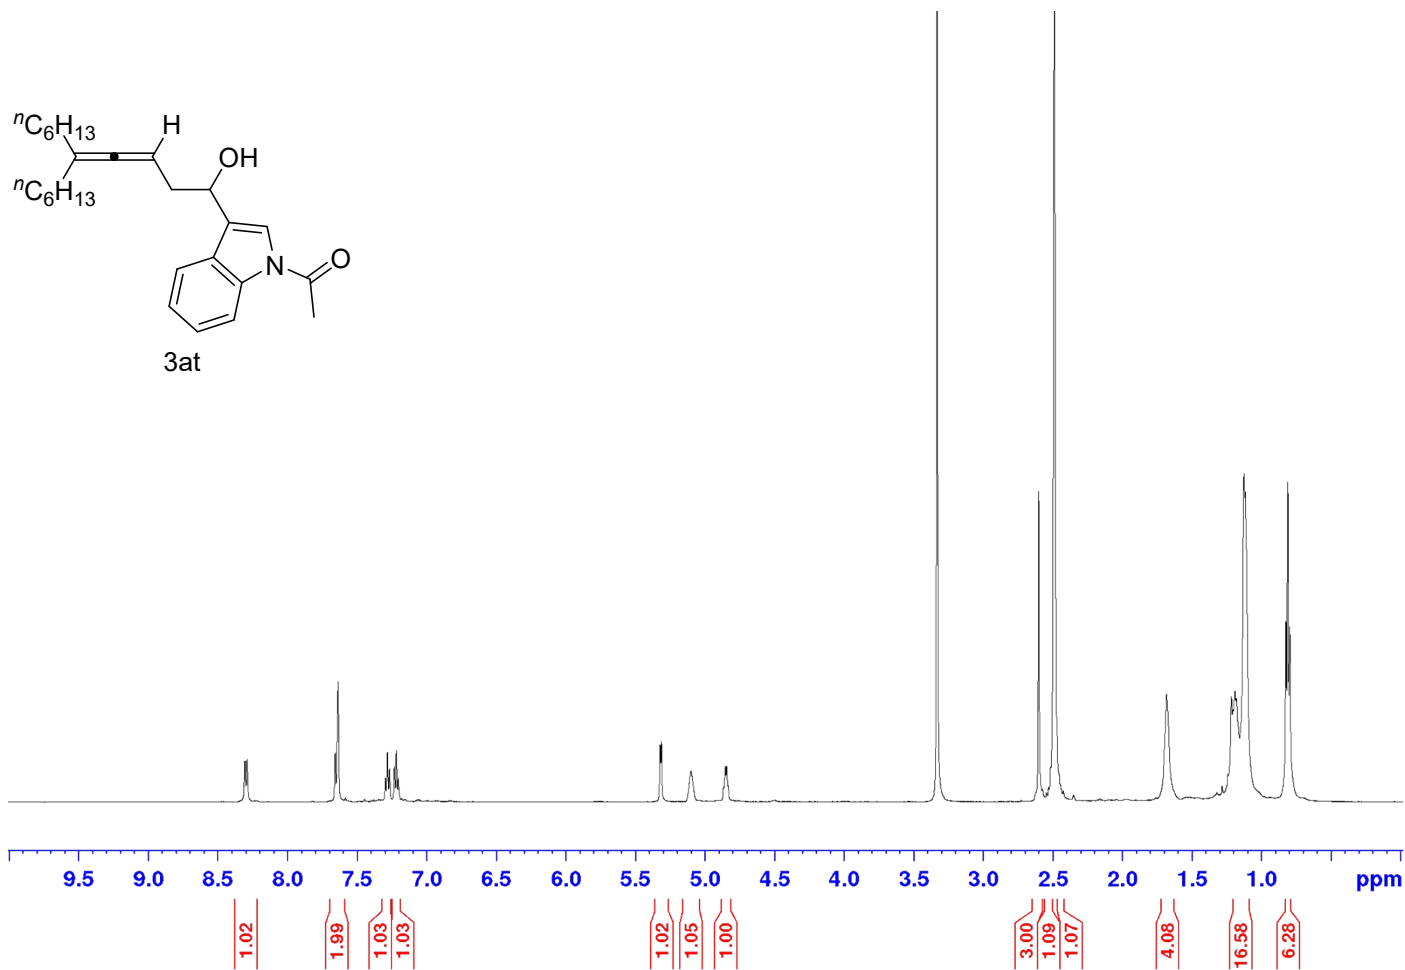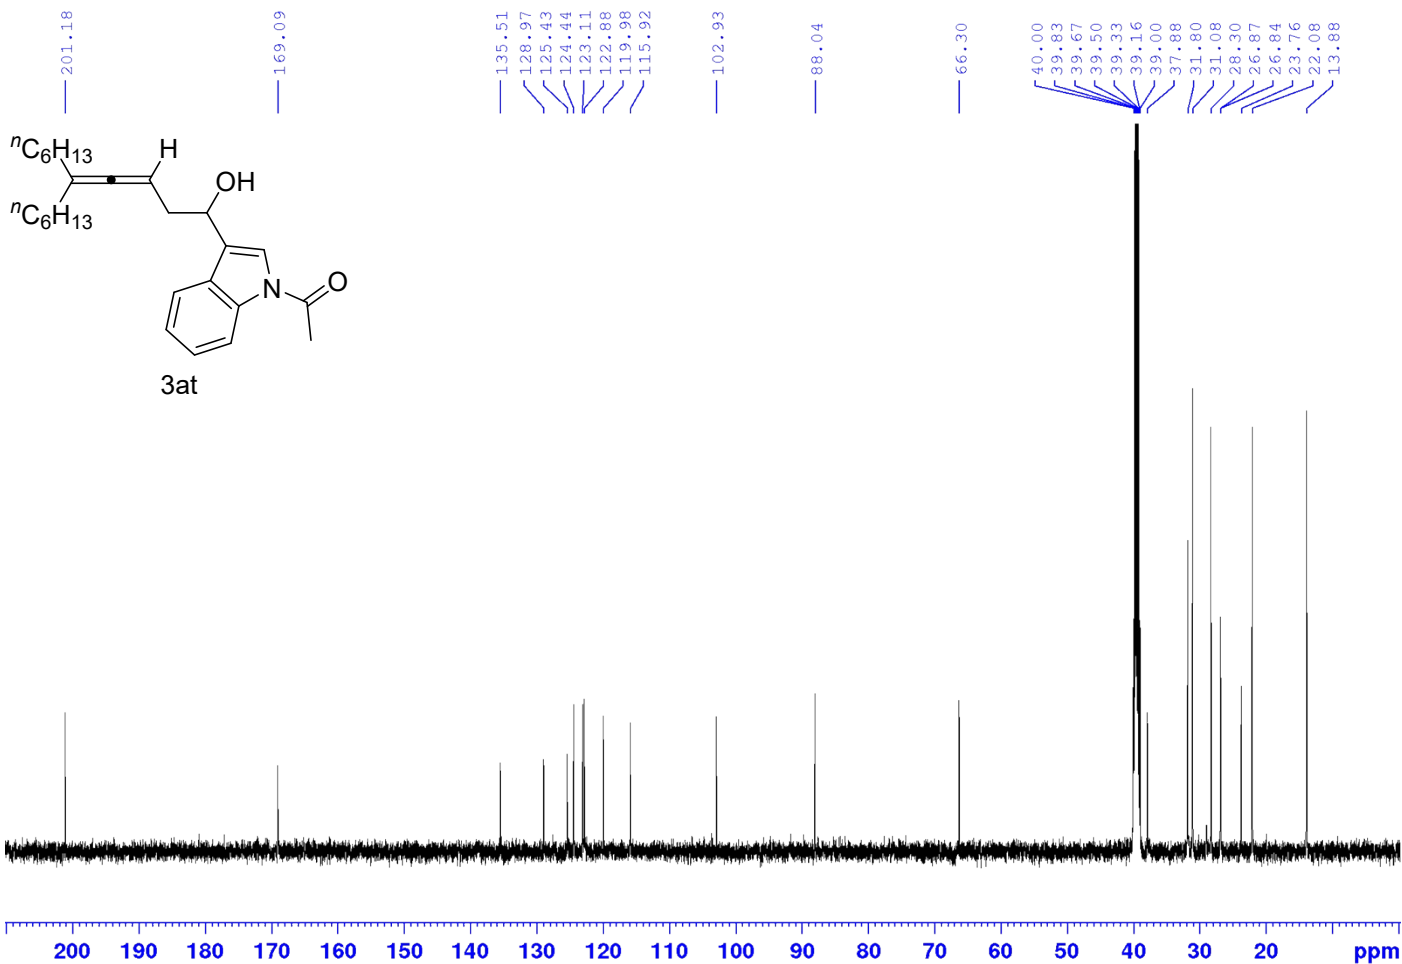

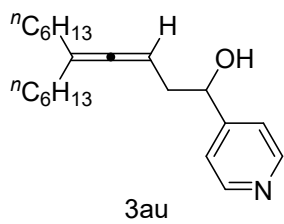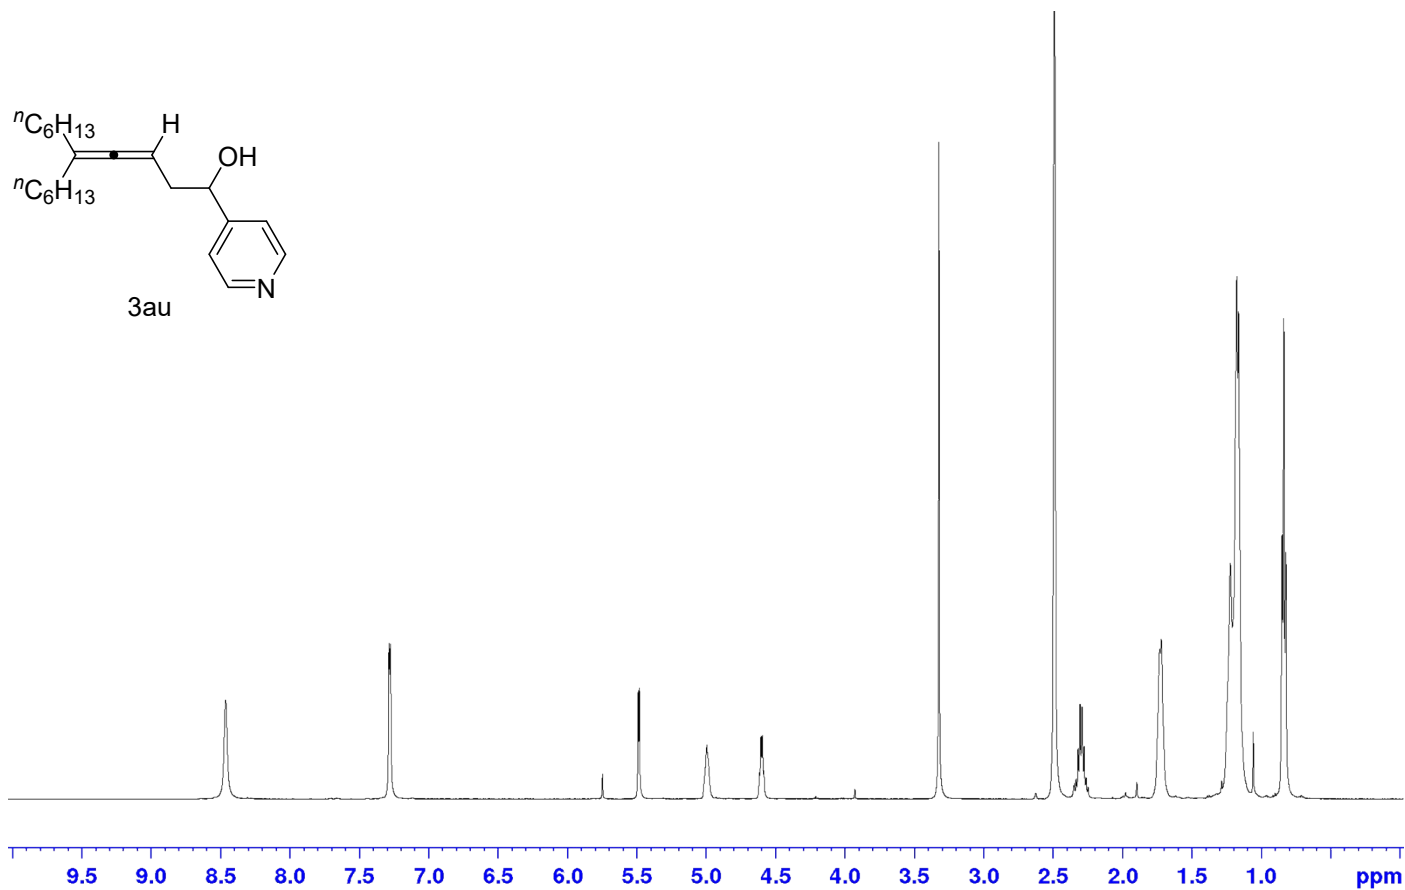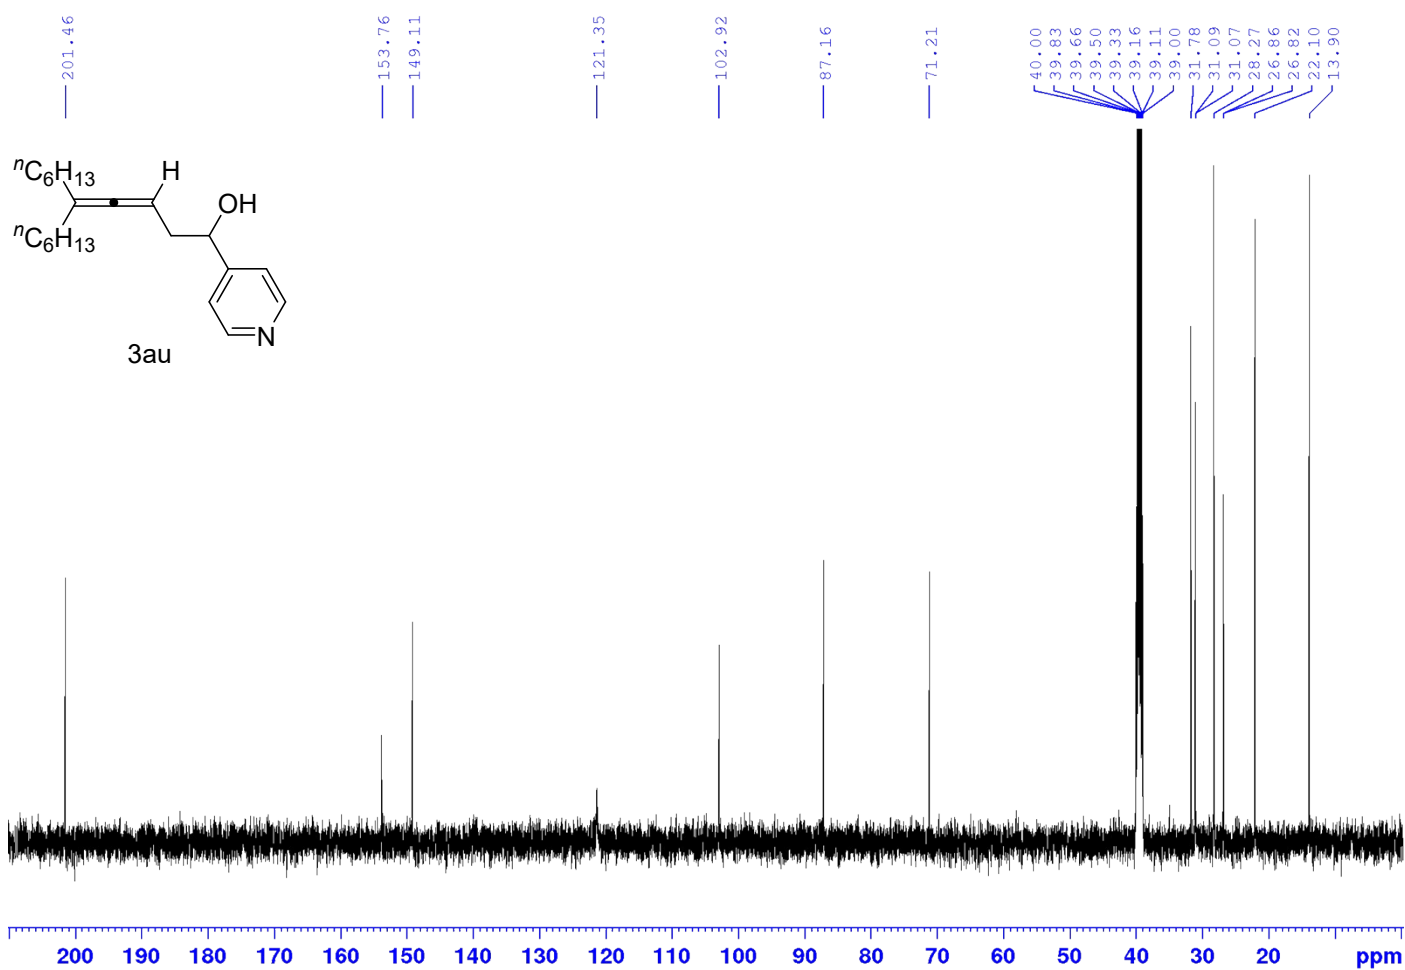

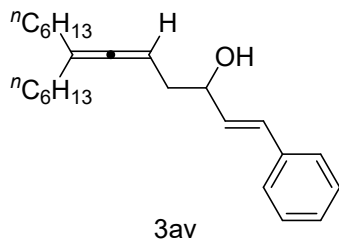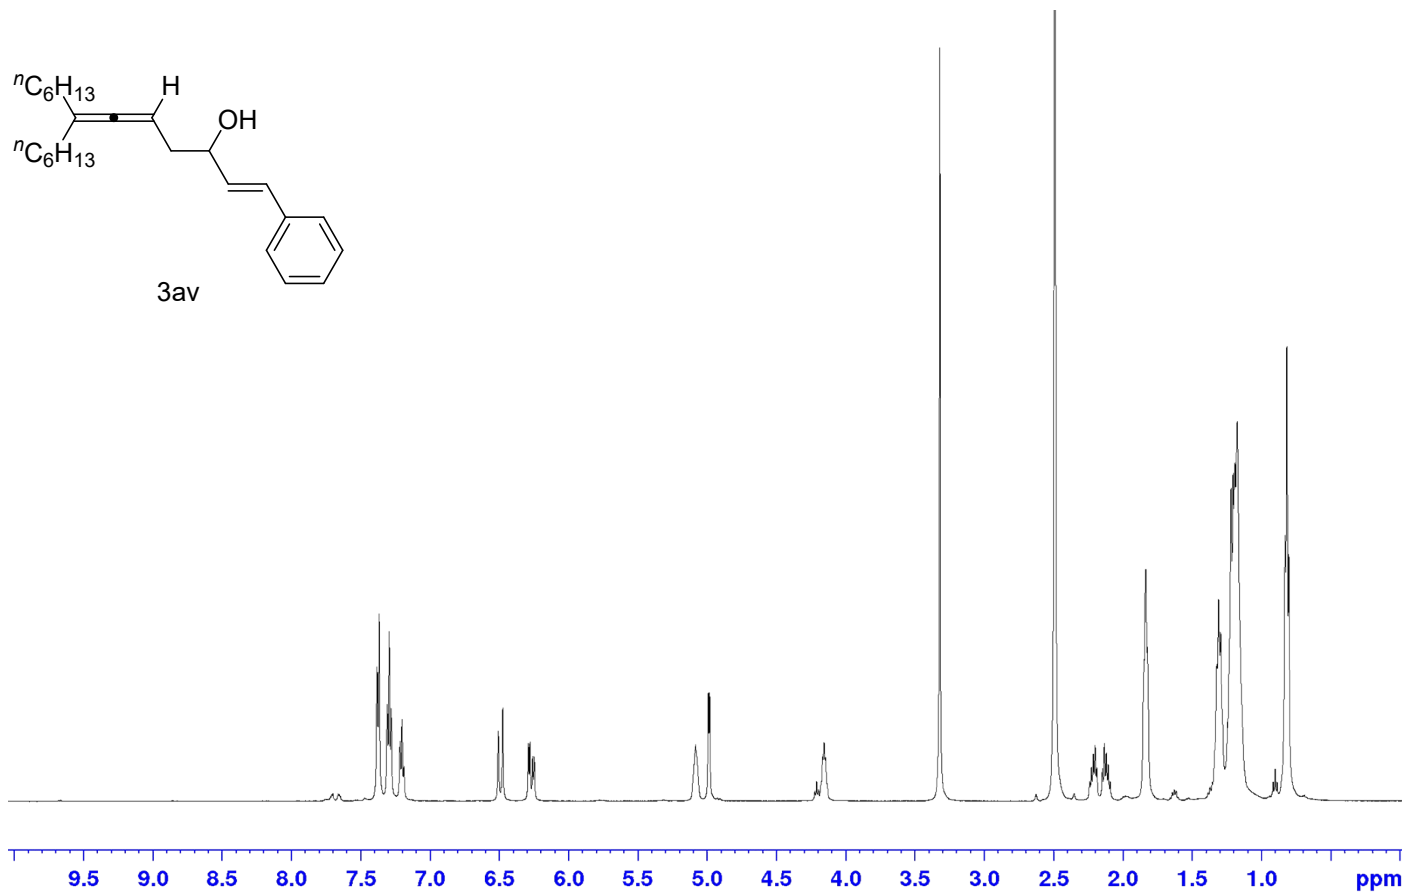

Integration values (from left to right): 1.99, 2.04, 1.03, 1.00, 1.03, 1.01, 1.00, 1.01, 1.04, 1.04, 4.07, 4.21, 12.24, 6.06.

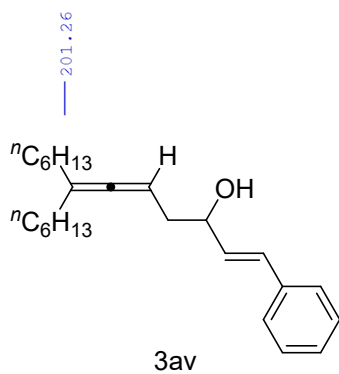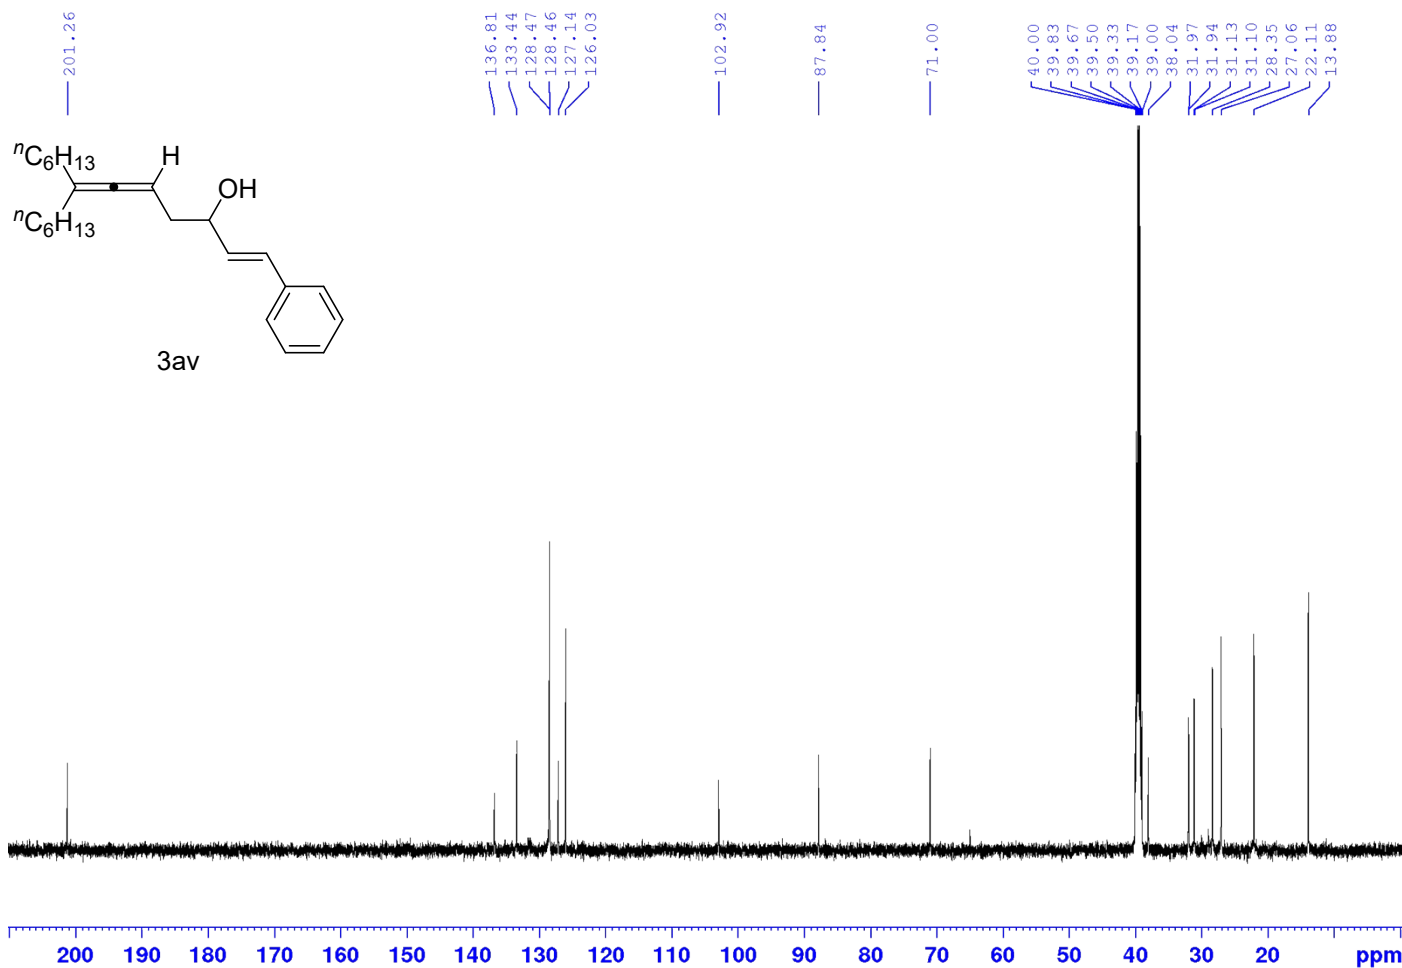

Chemical shift values (from left to right): 201.26, 136.81, 133.44, 128.47, 128.46, 127.14, 126.03, 102.92, 87.84, 71.00, 40.00, 39.83, 39.67, 39.50, 39.33, 39.17, 39.00, 38.04, 31.97, 31.94, 31.13, 31.10, 28.35, 27.06, 22.11, 13.88.

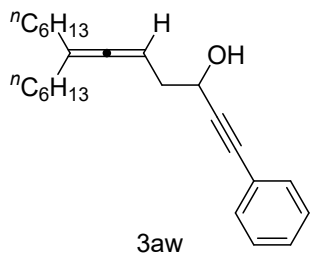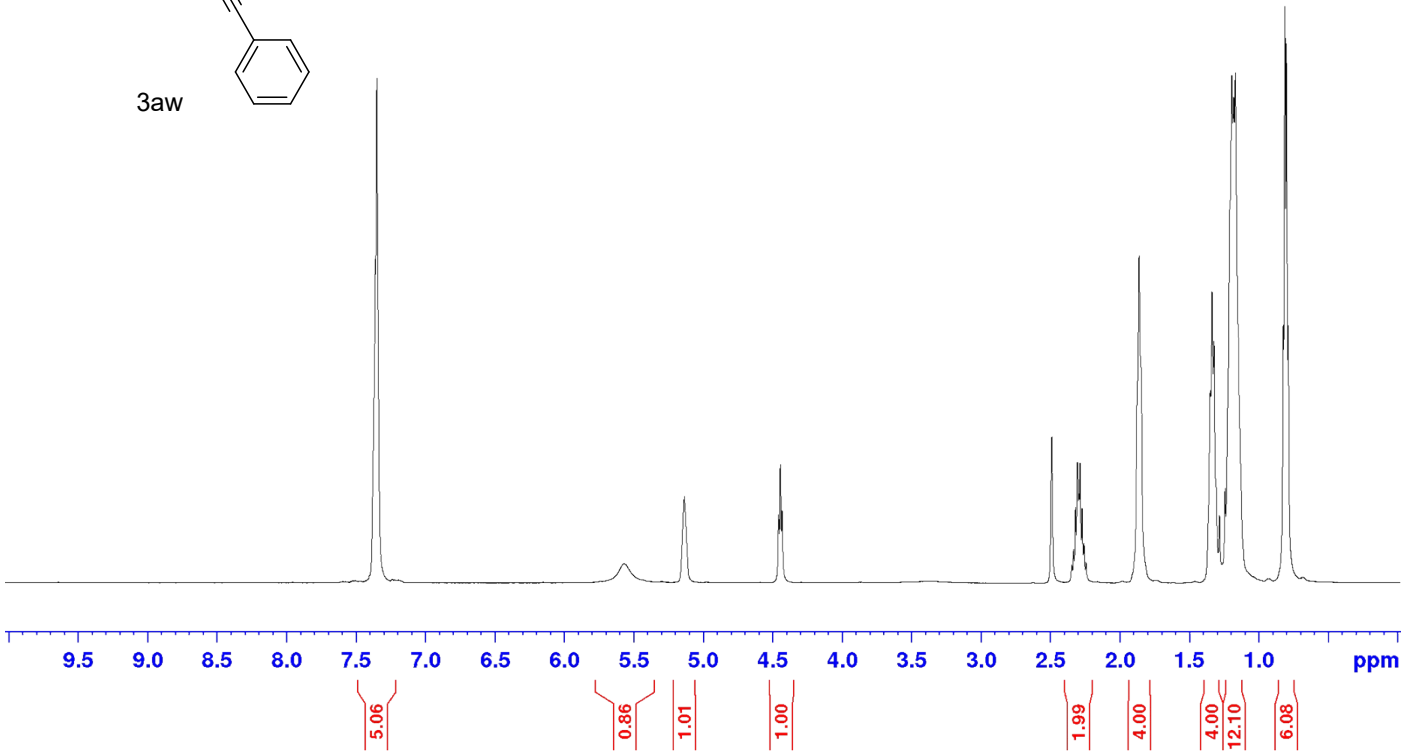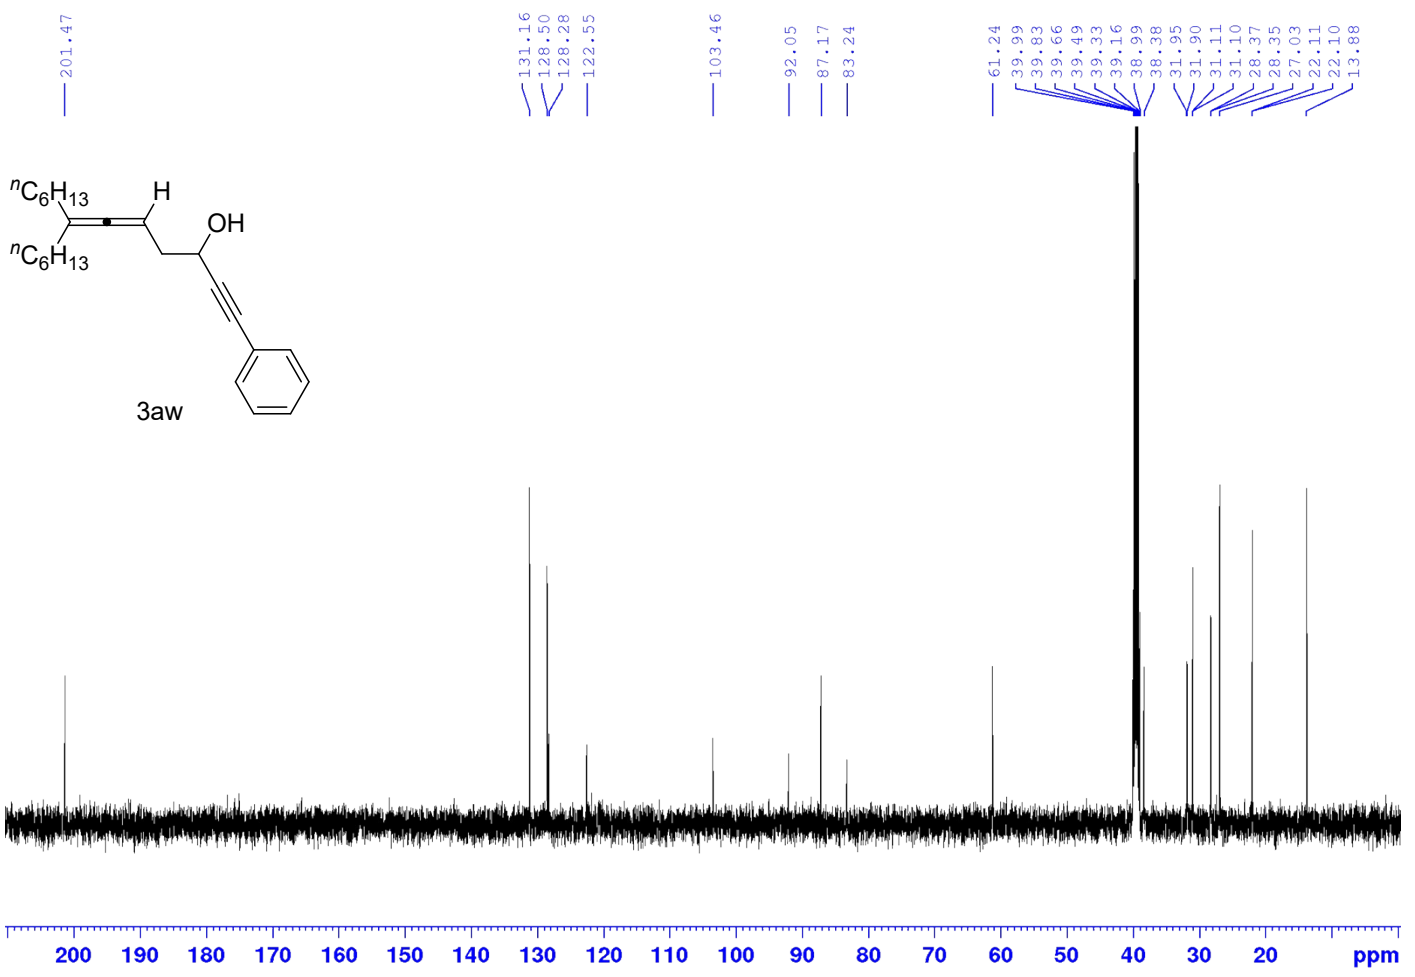

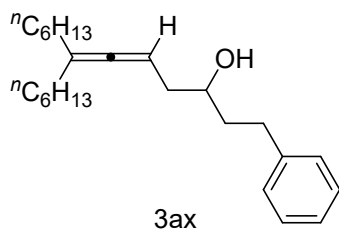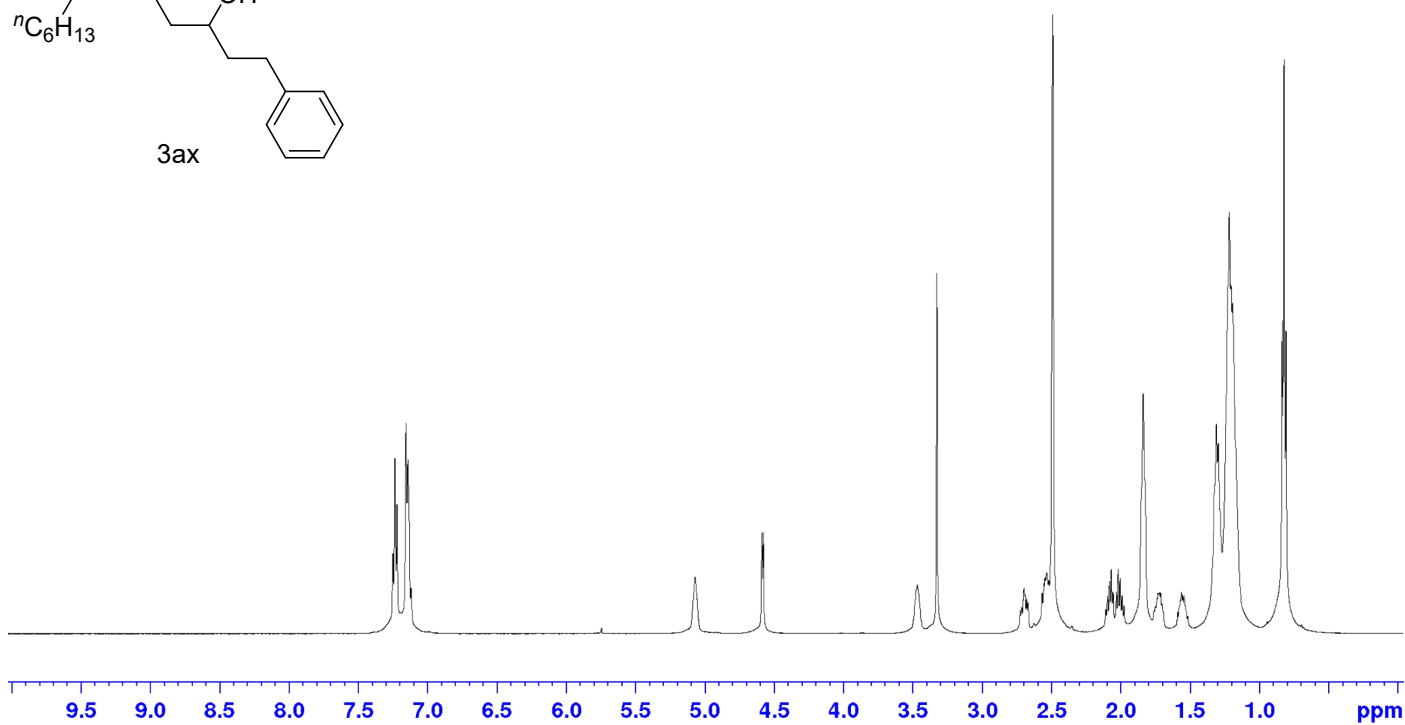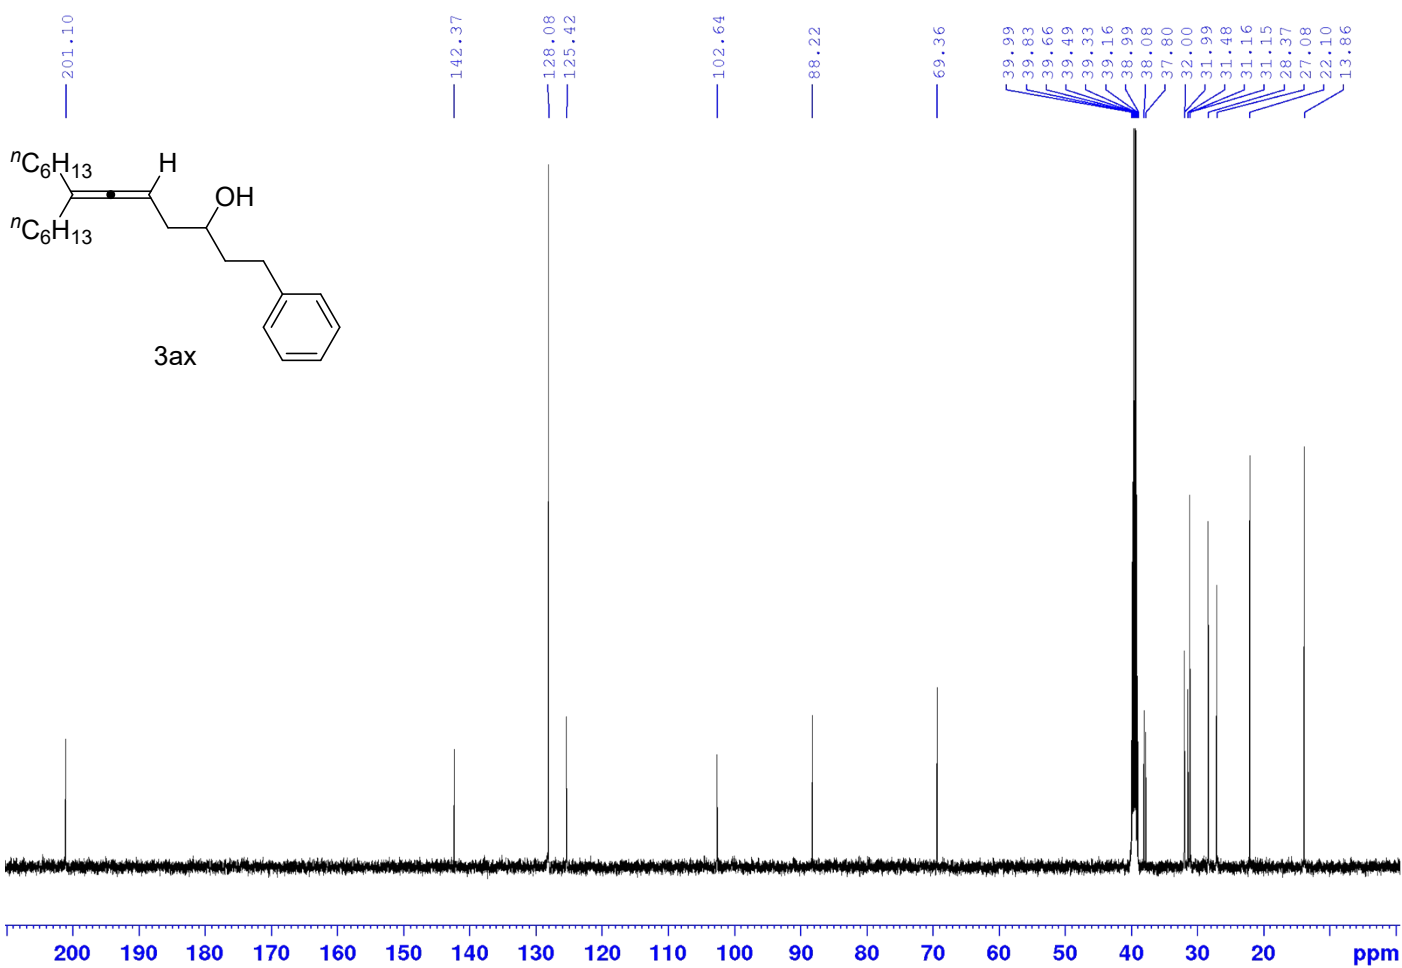



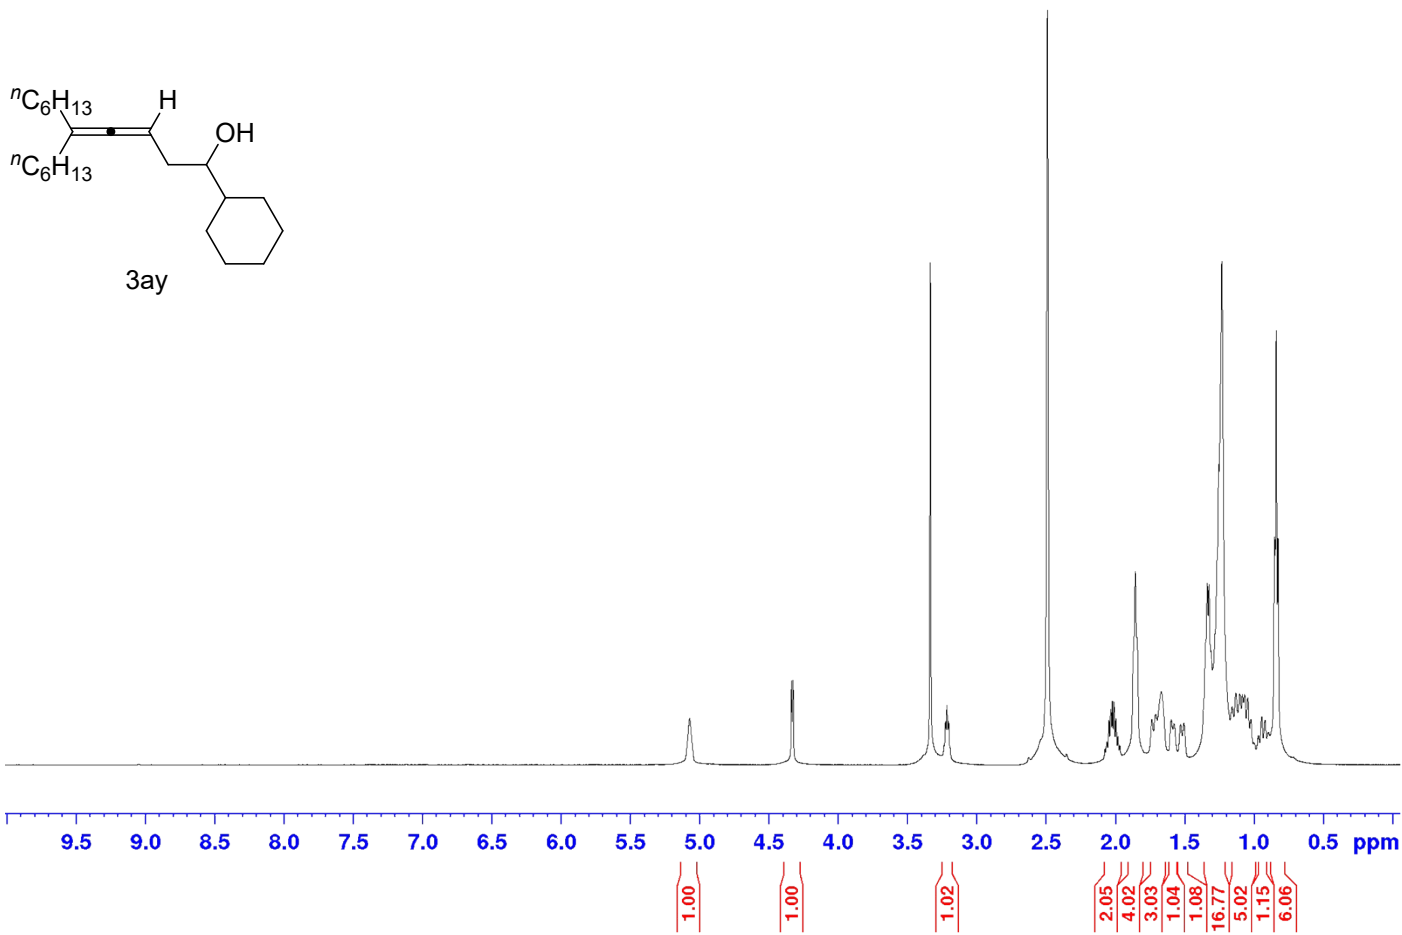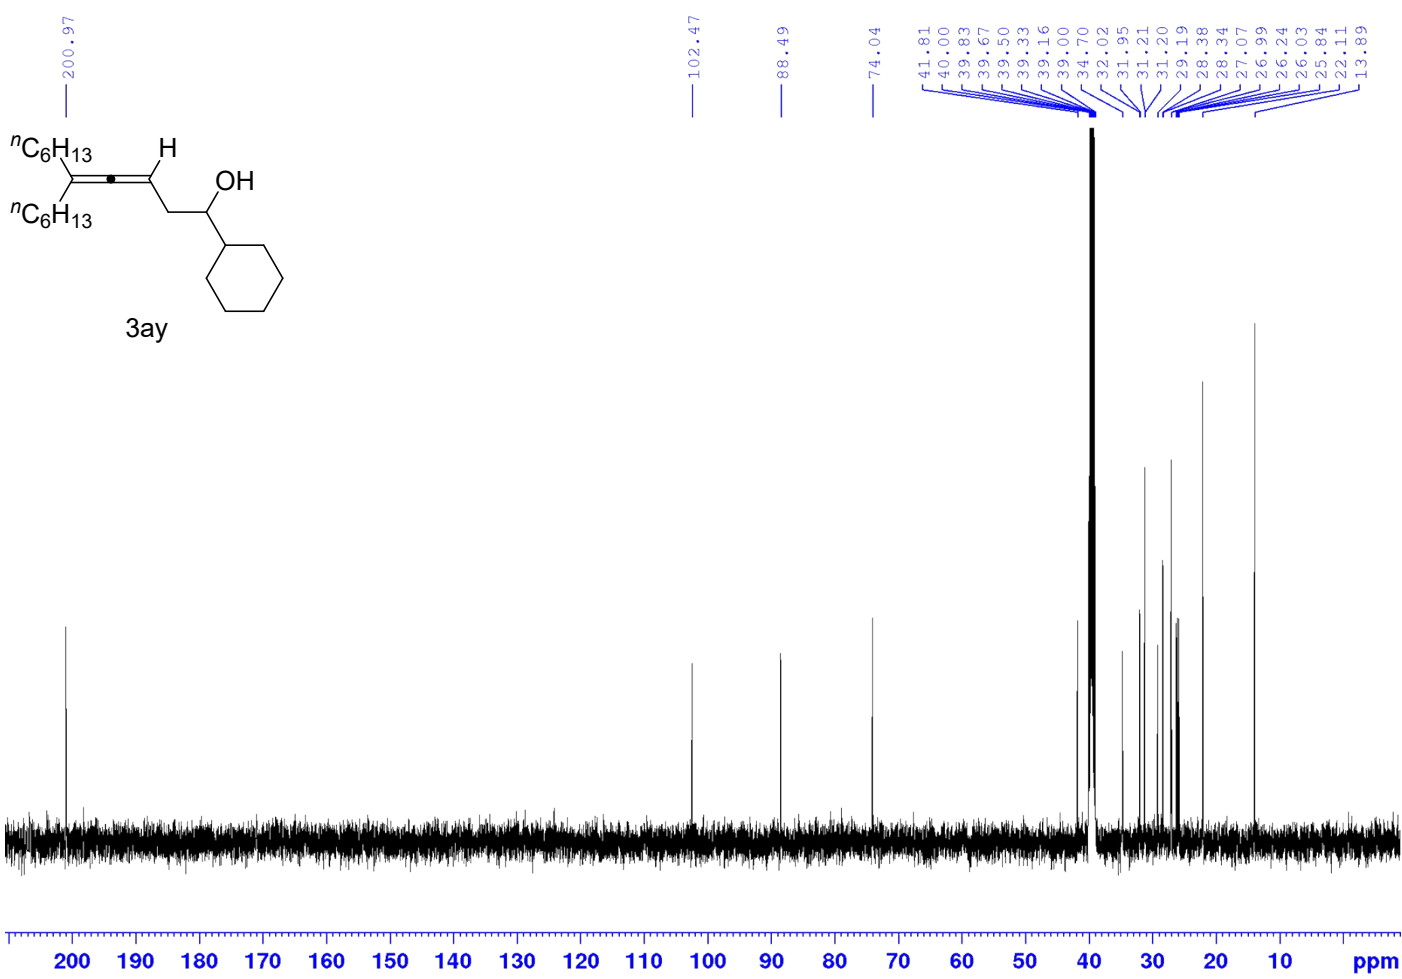

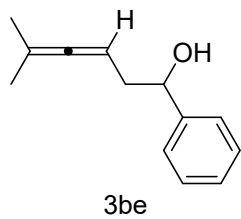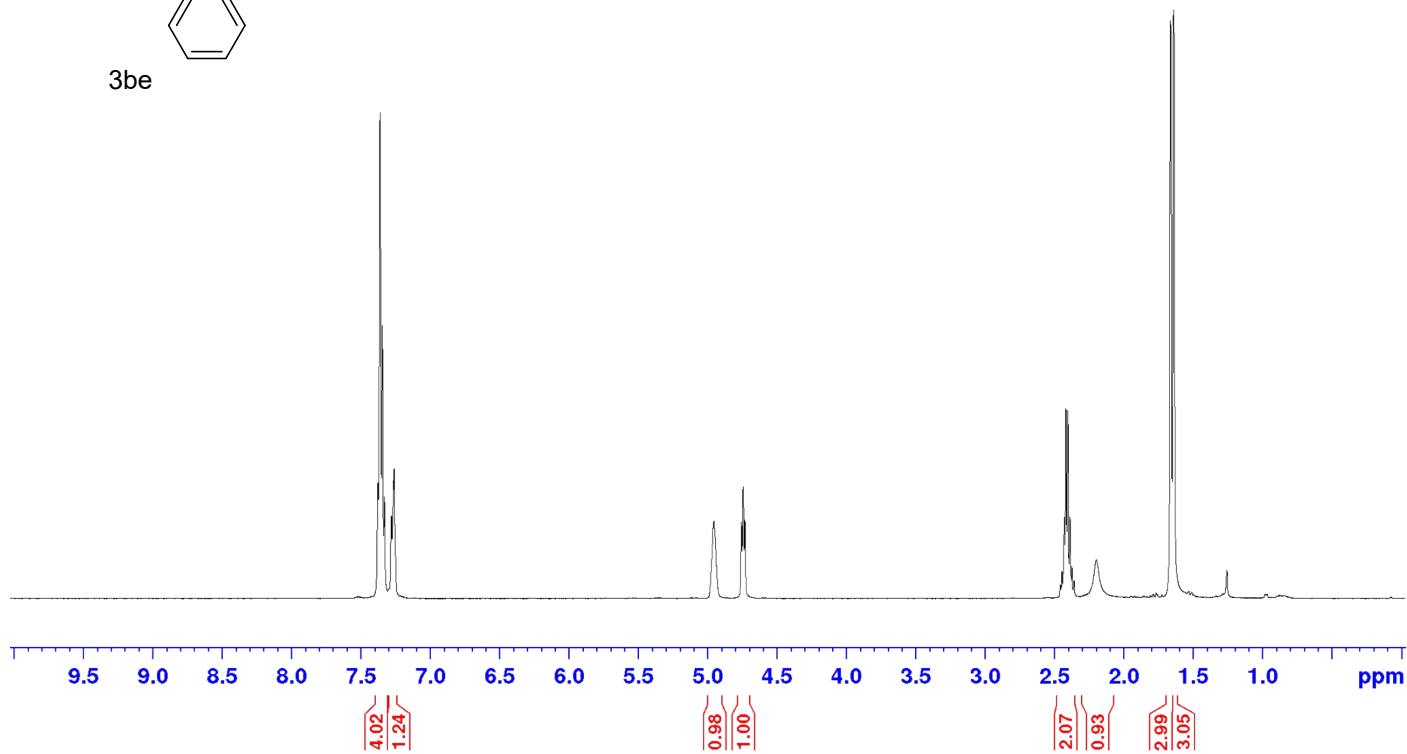

203.22  
 143.73  
 128.26  
 127.36  
 125.93  
 95.55  
 84.63  
 77.25  
 77.00  
 76.74  
 73.59  
 39.26  
 20.60  
 20.45

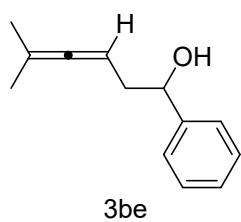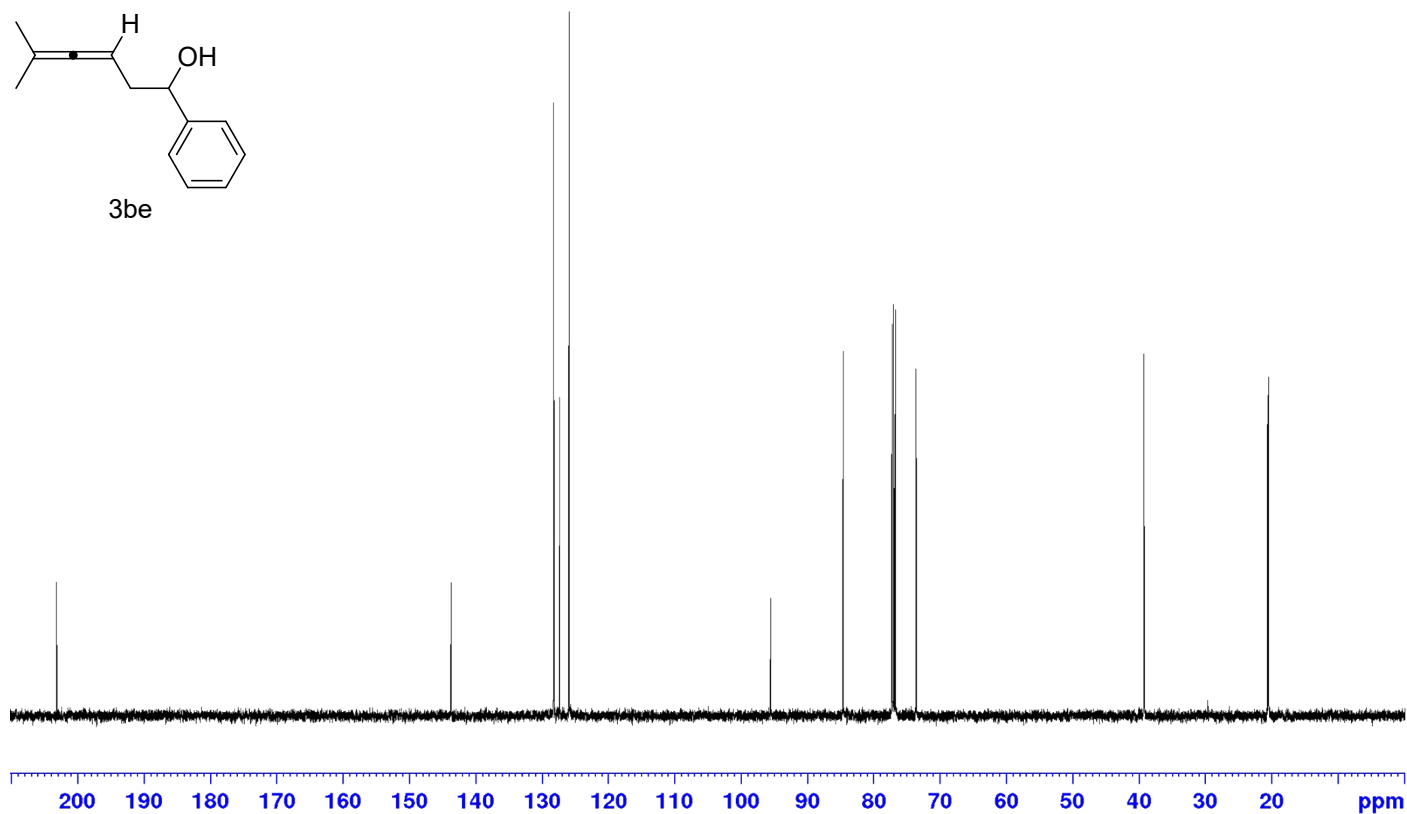

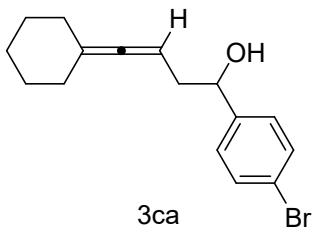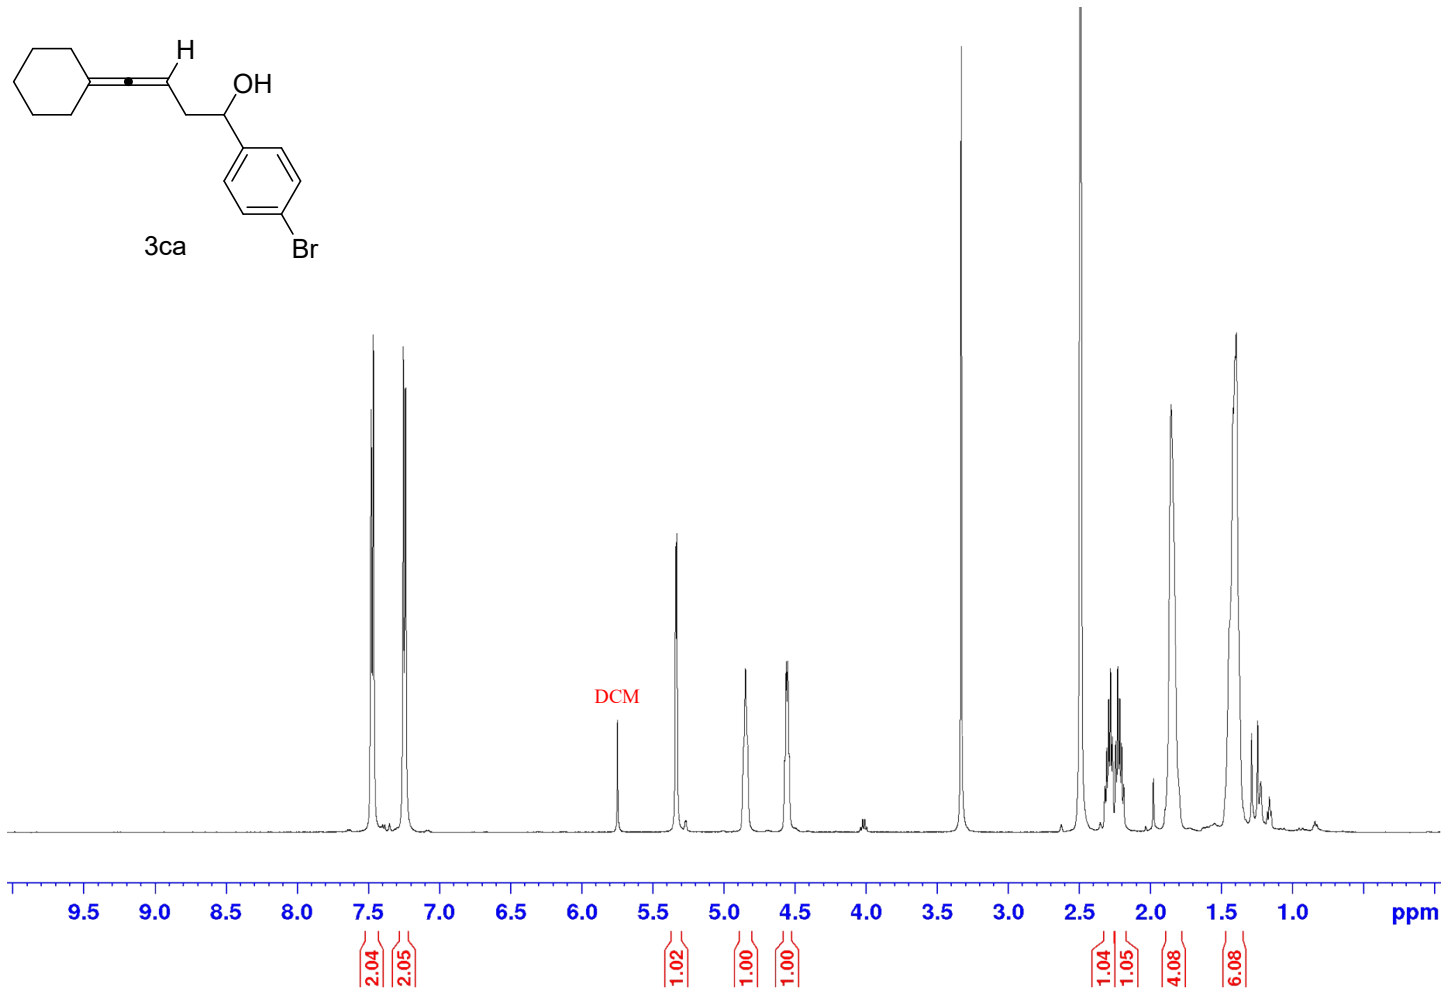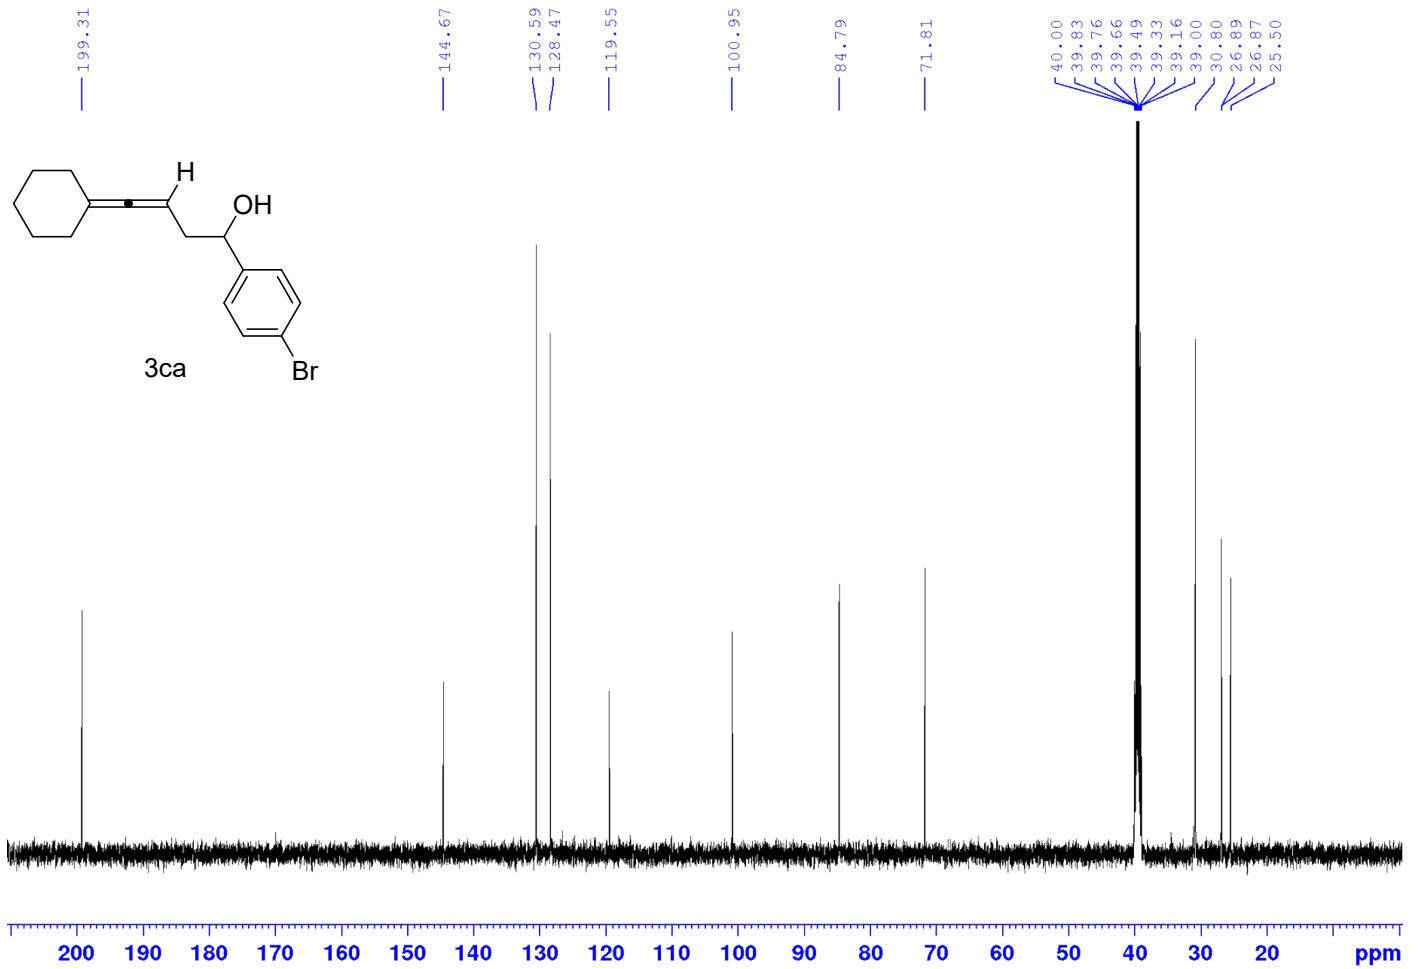

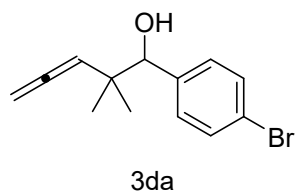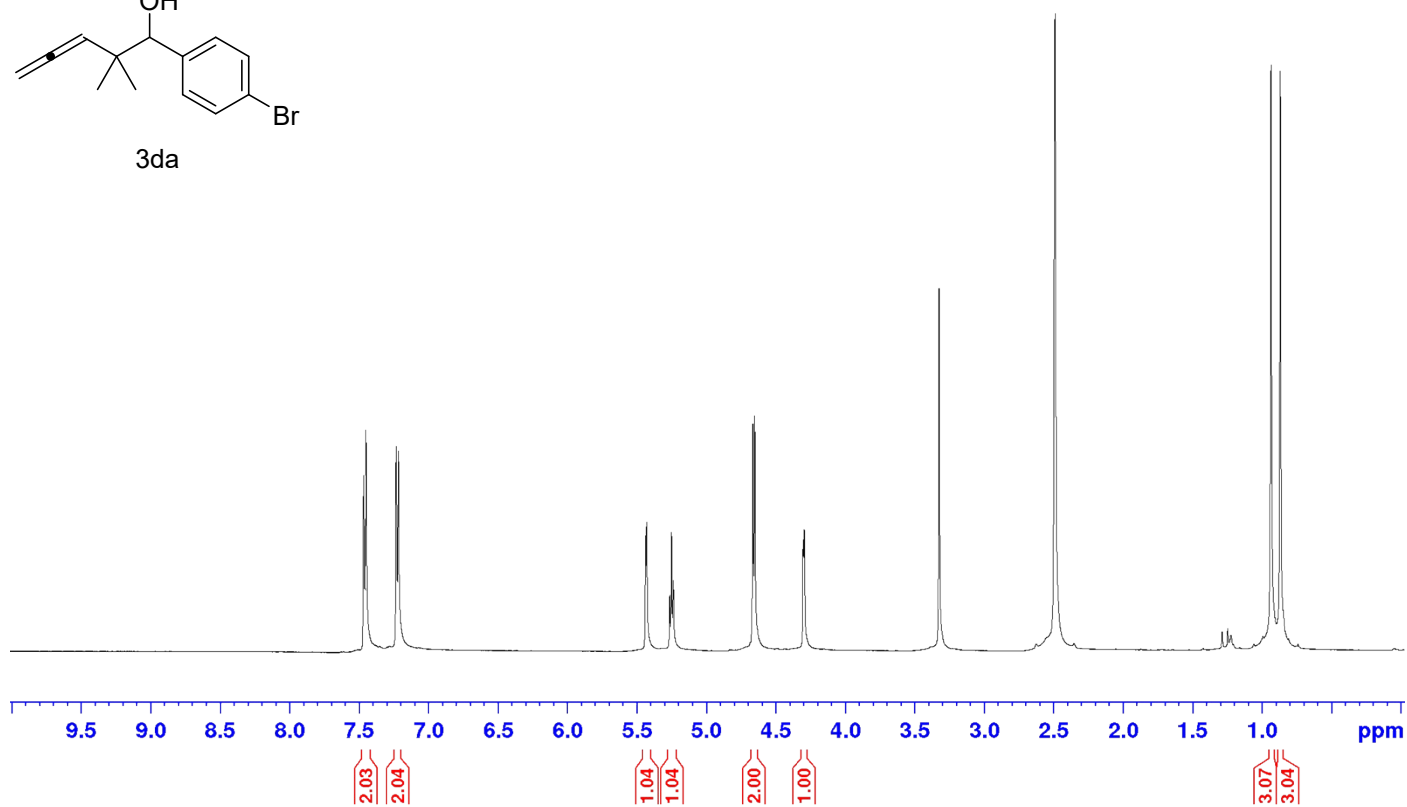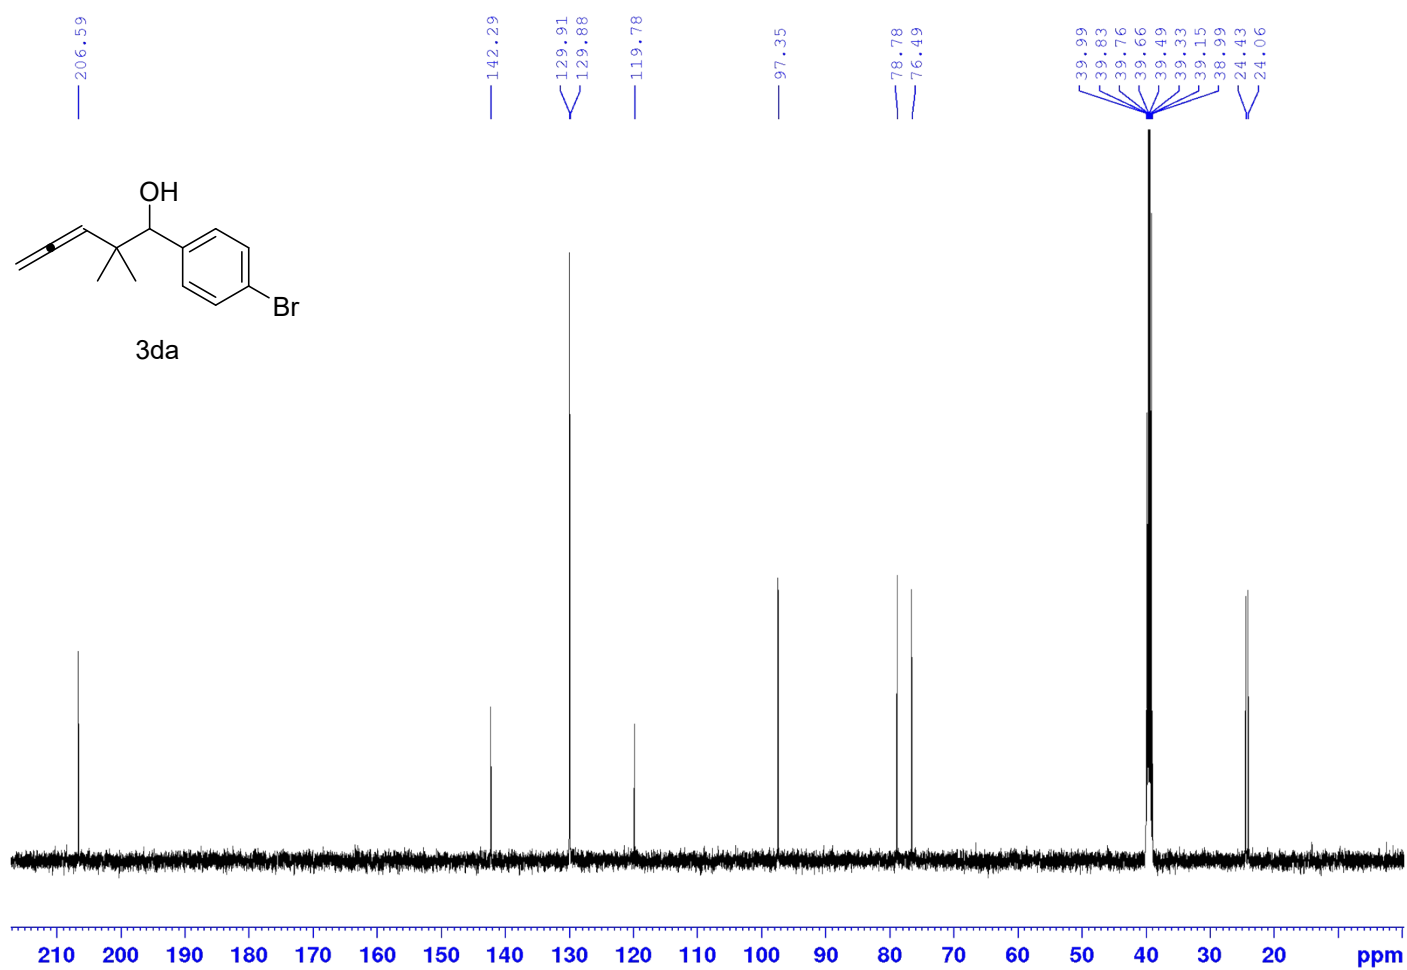

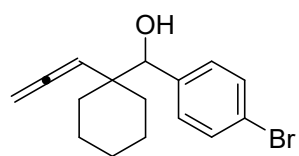

3ea

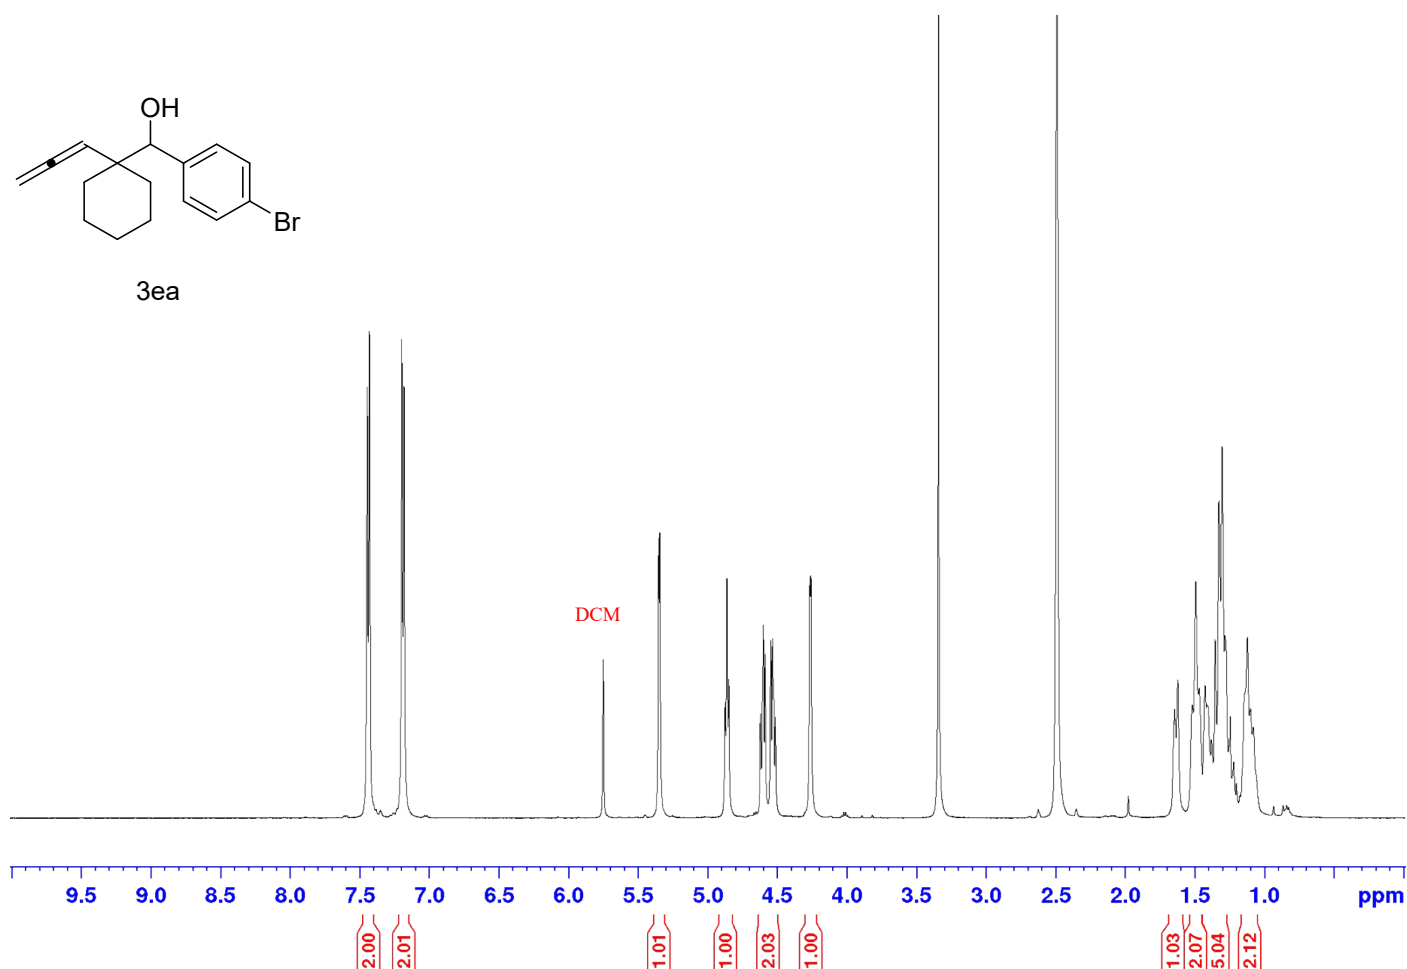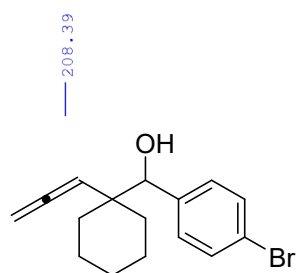

3ea

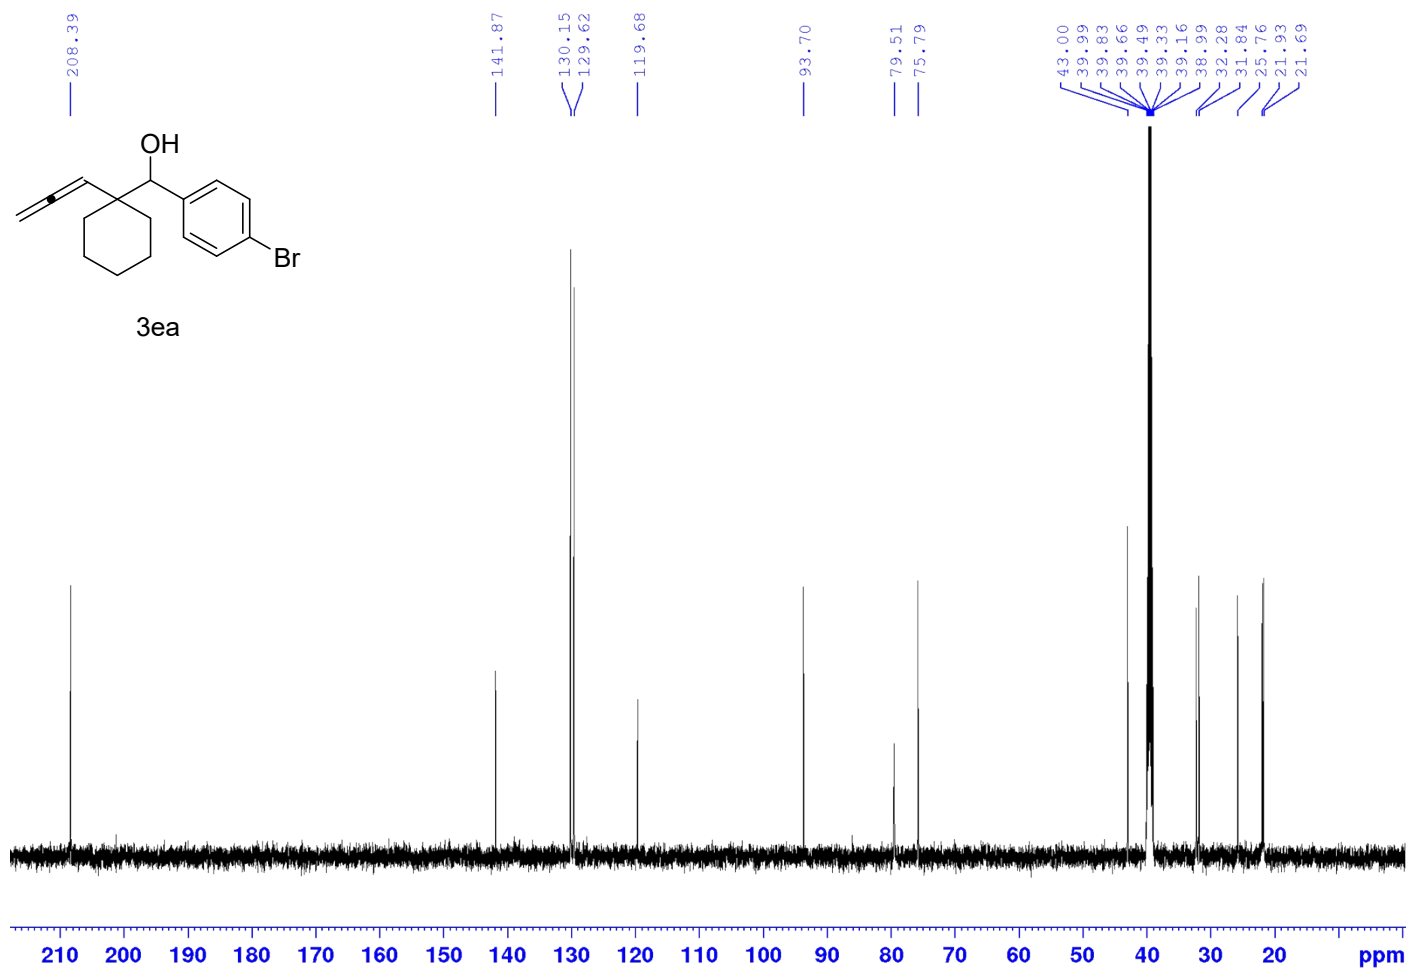

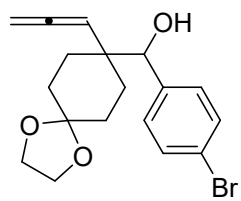

3fa

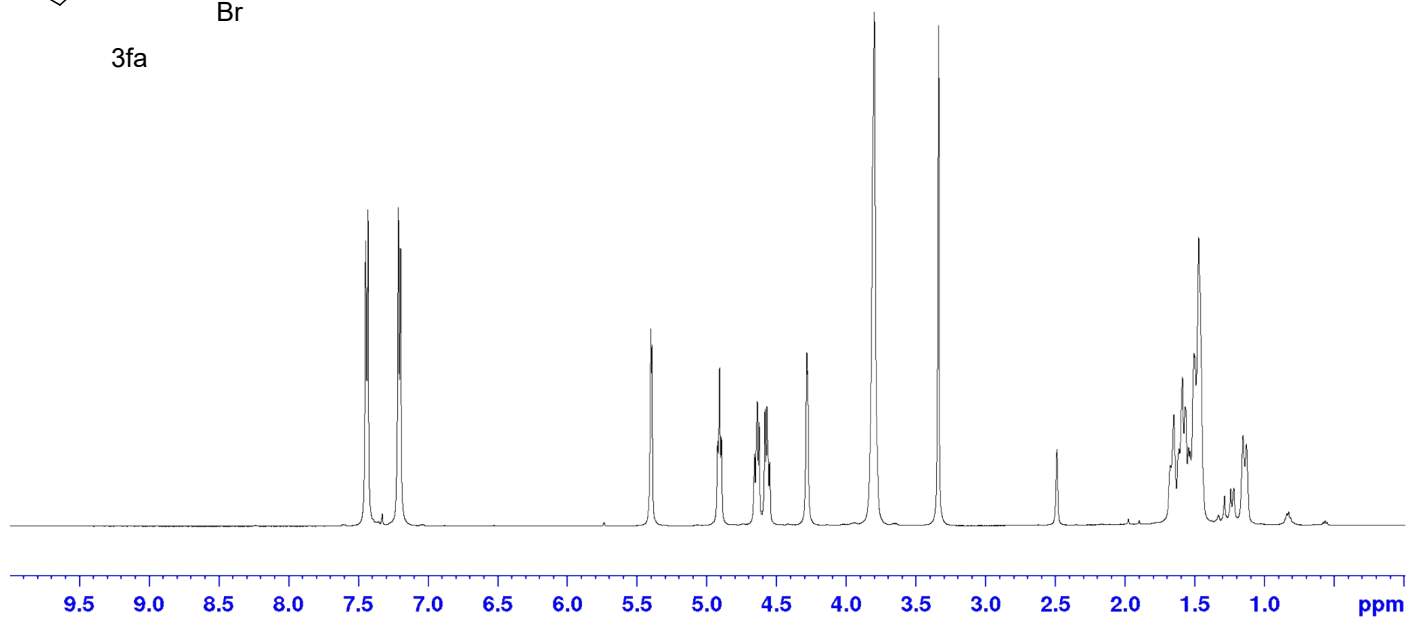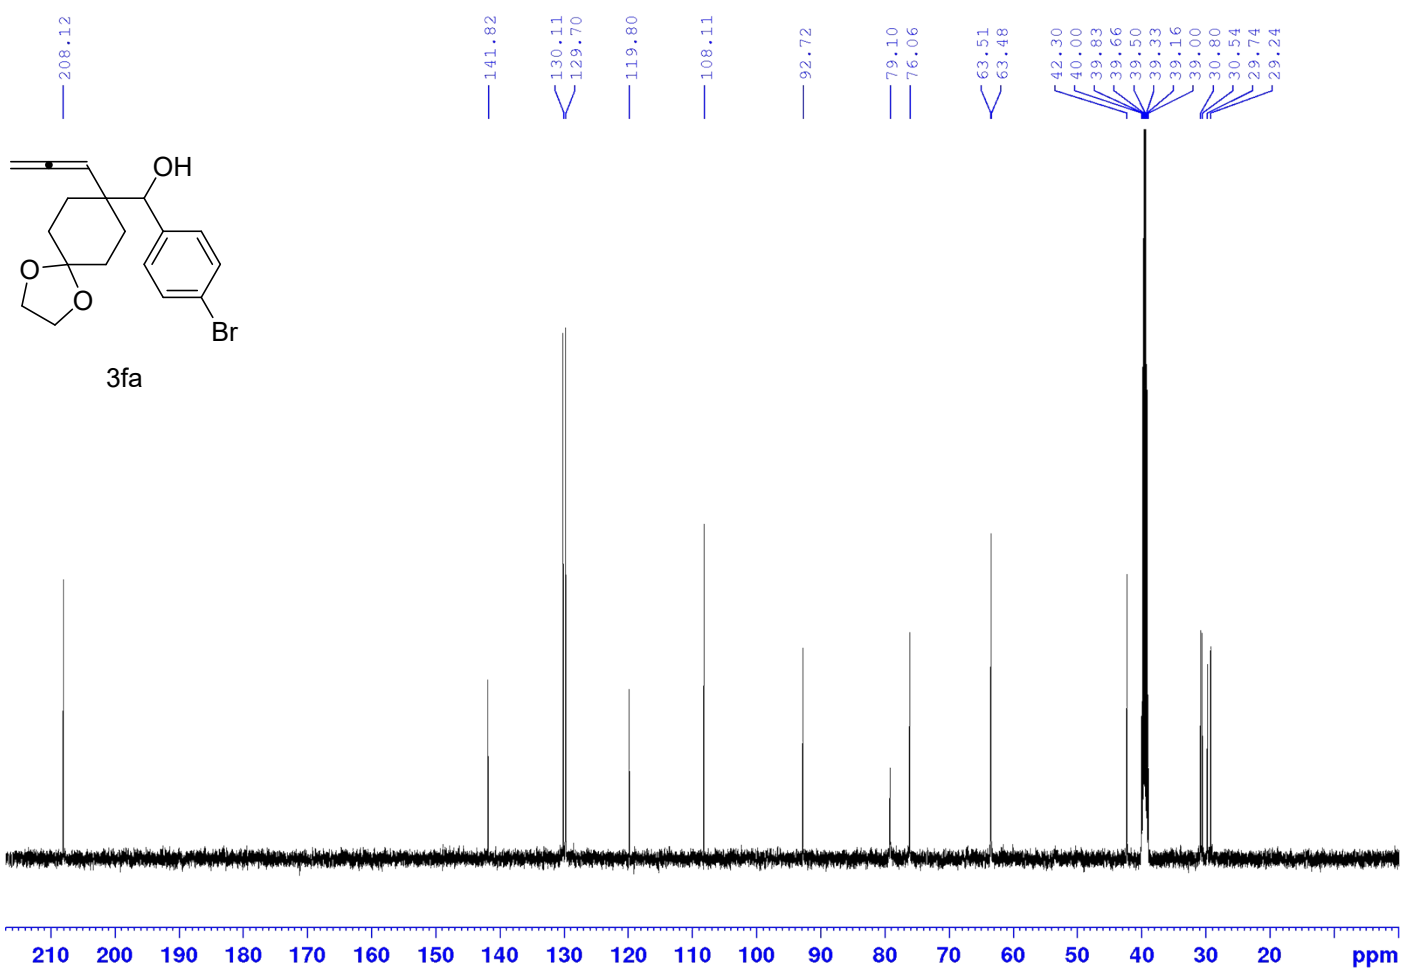

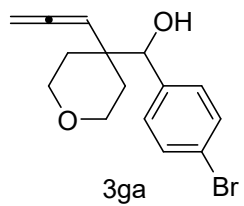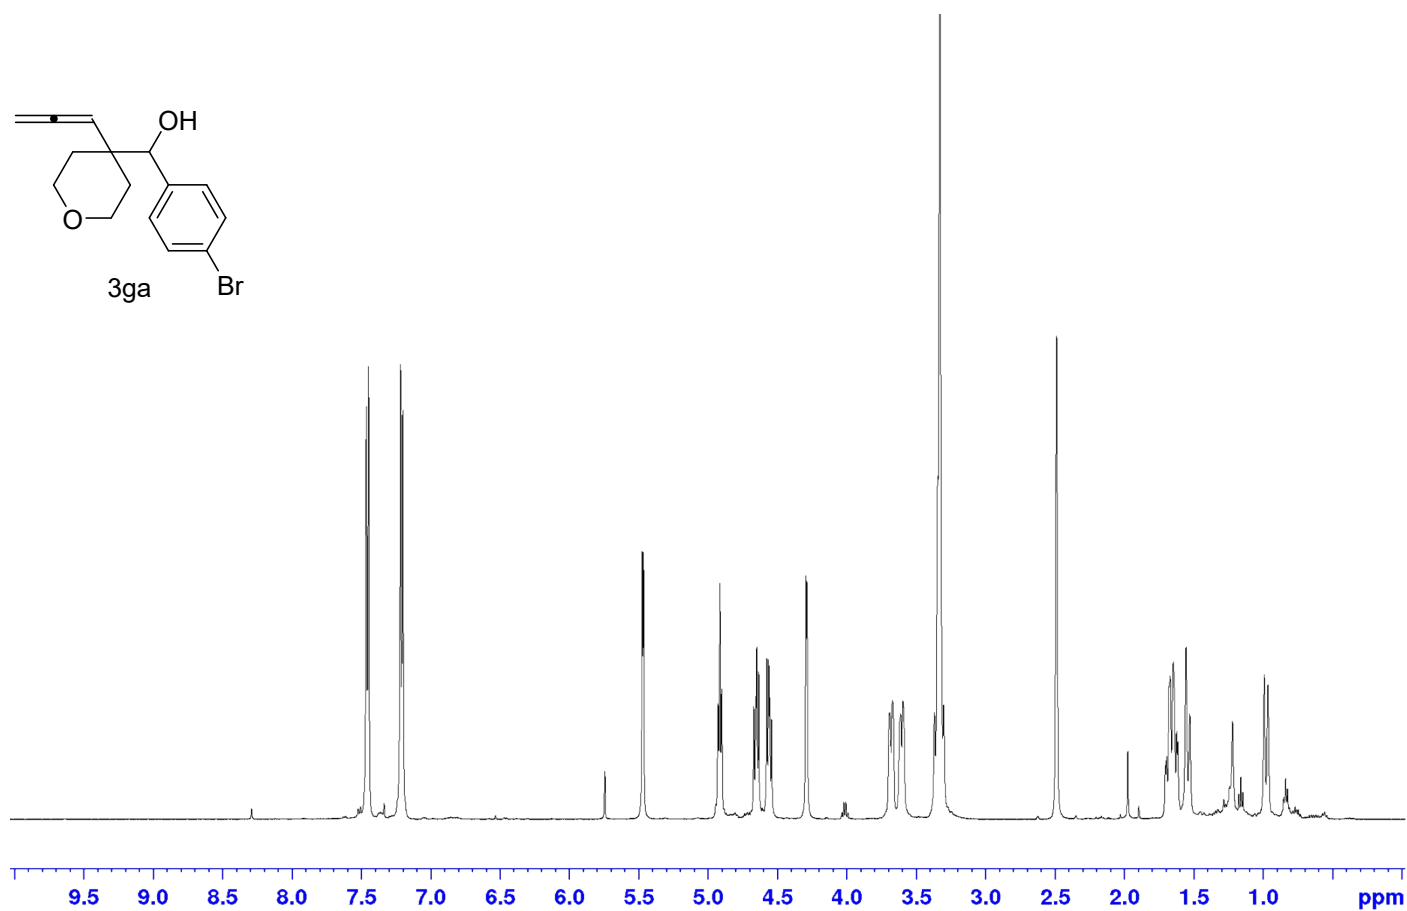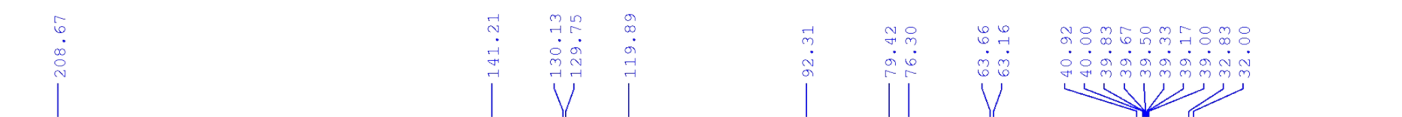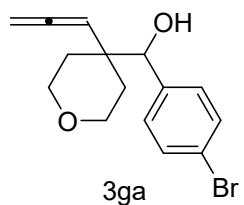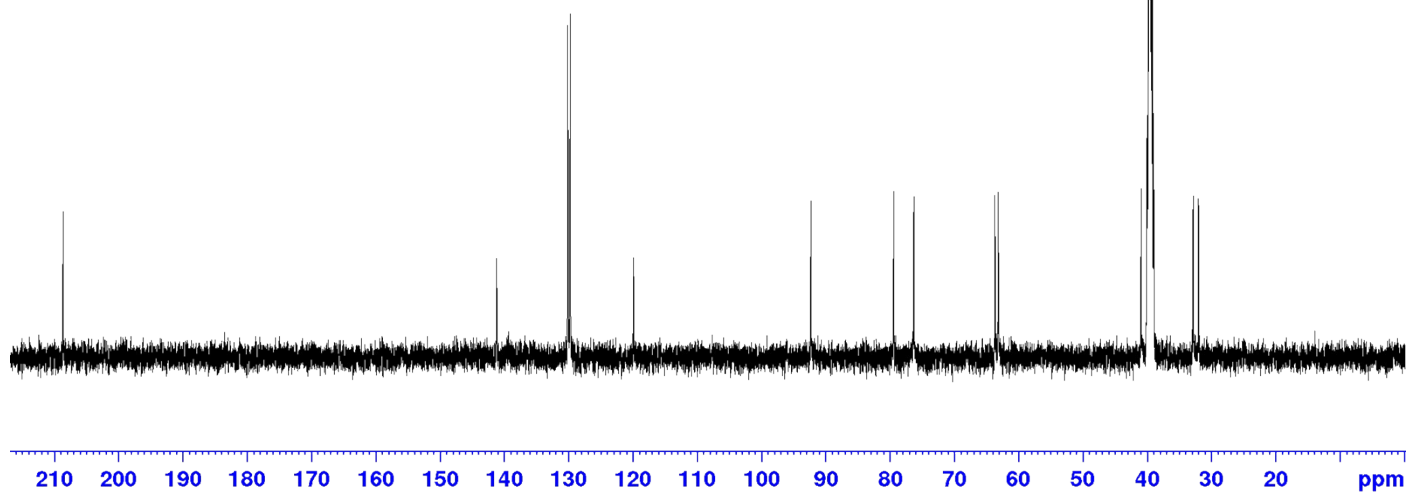

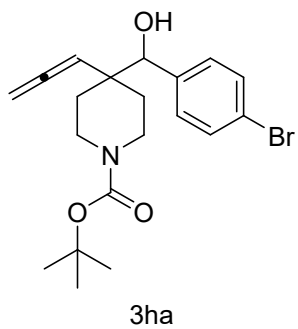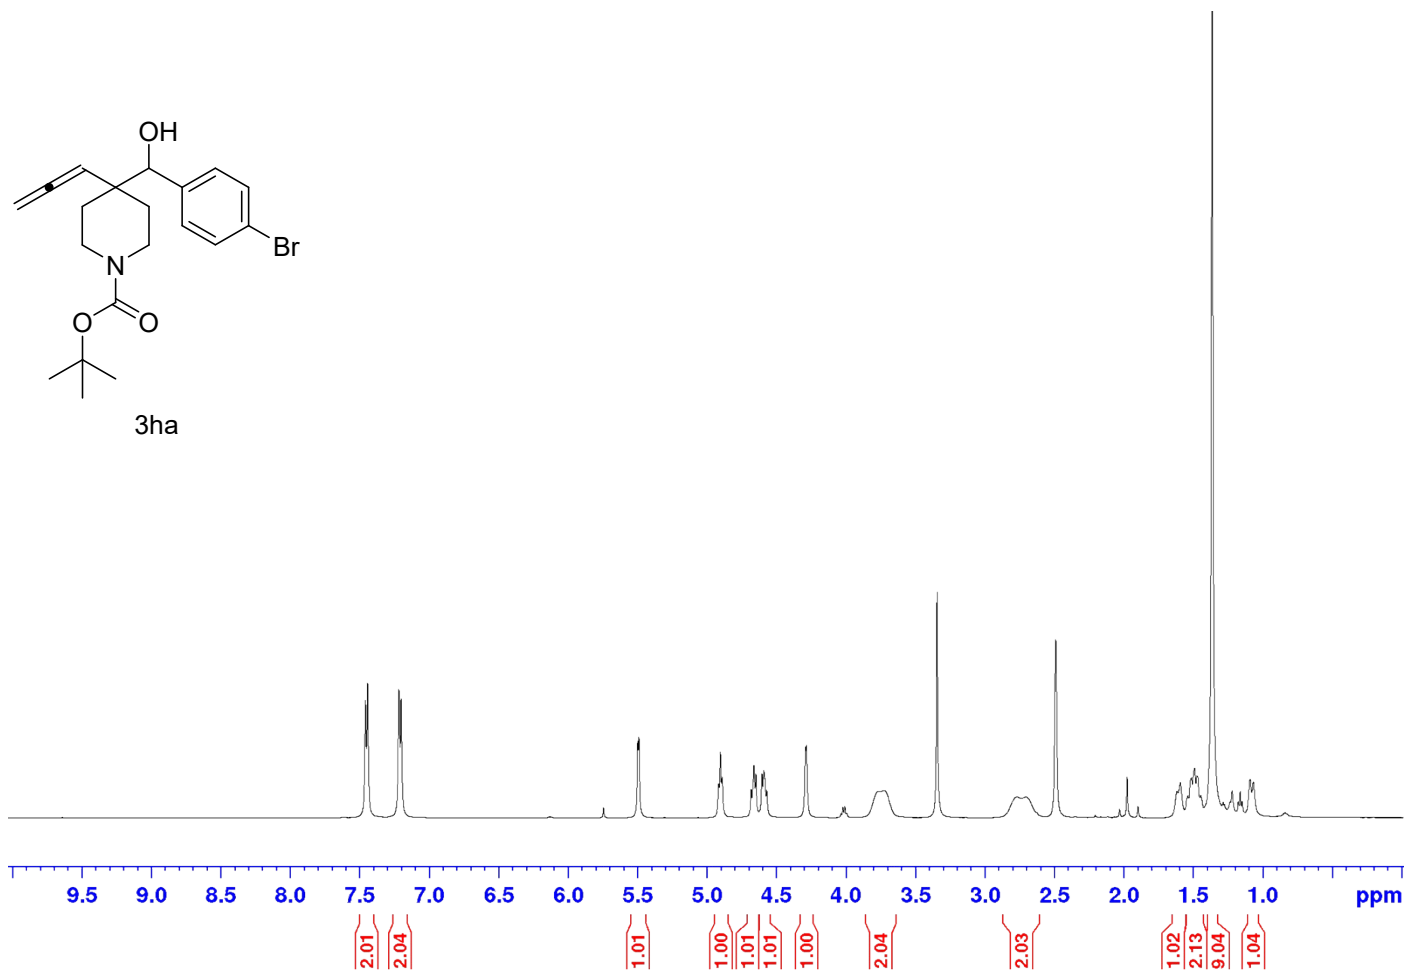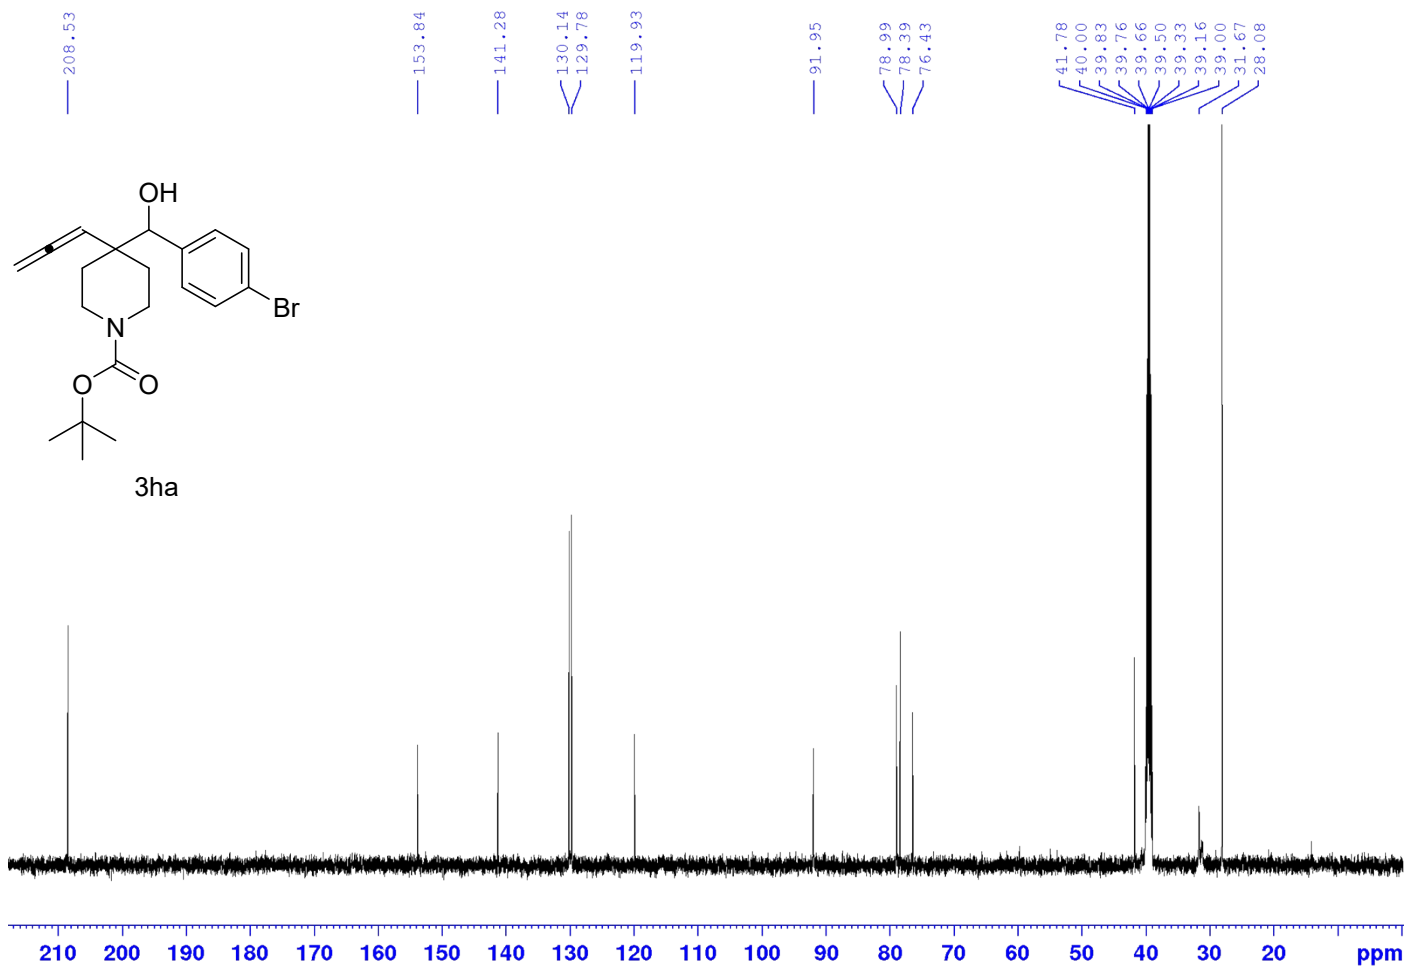



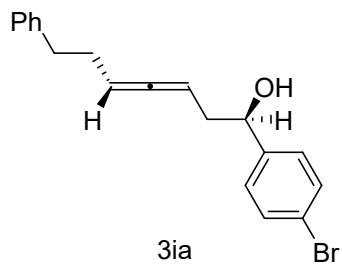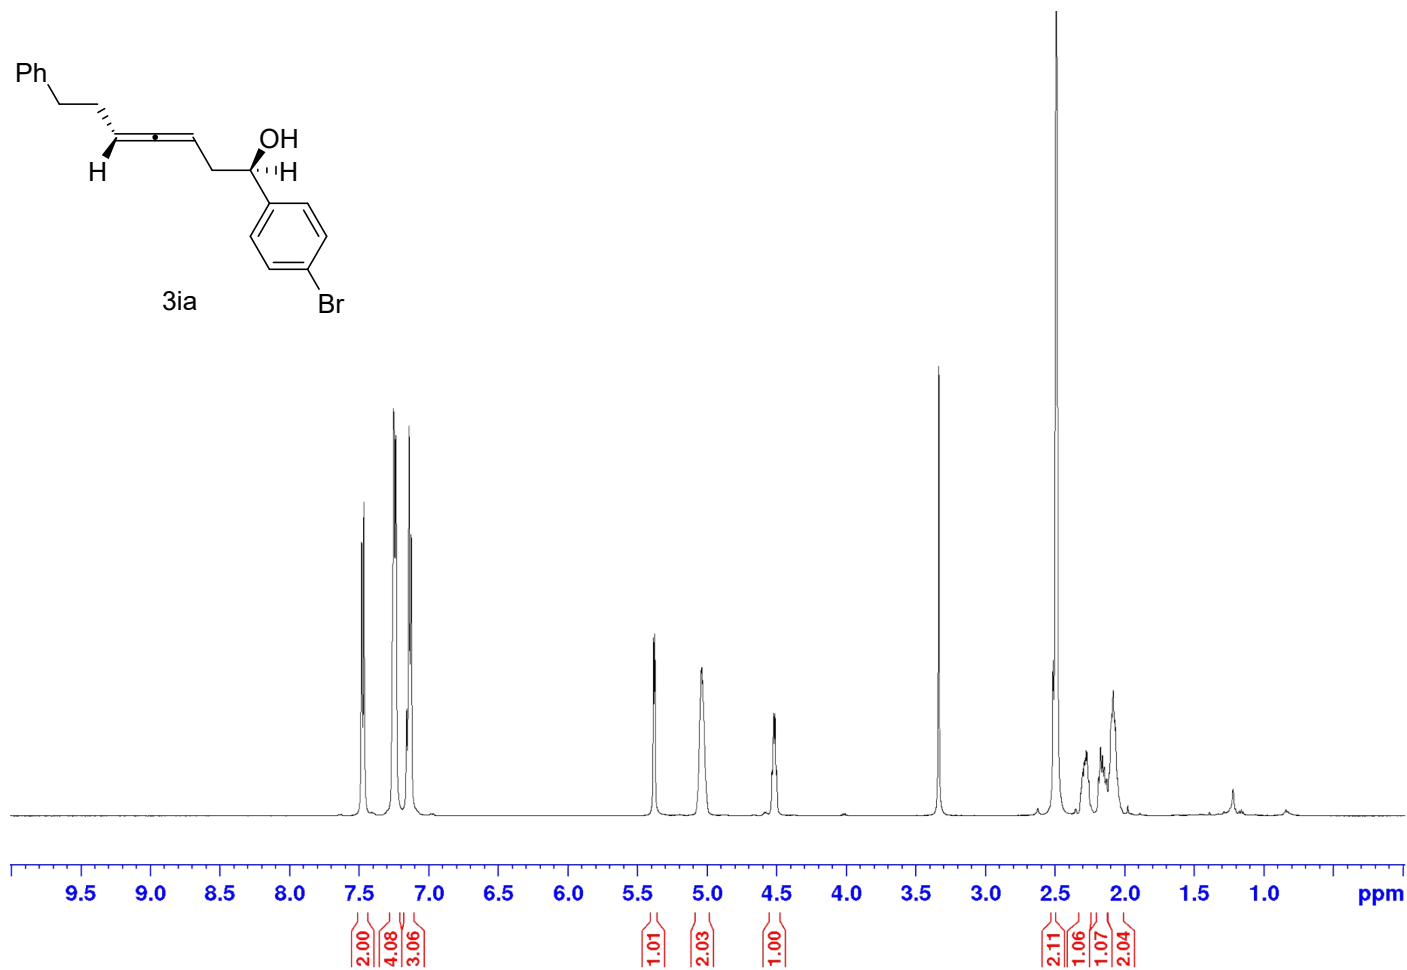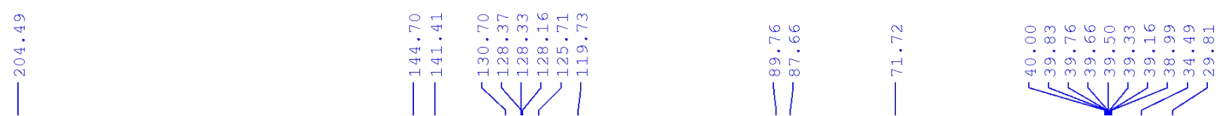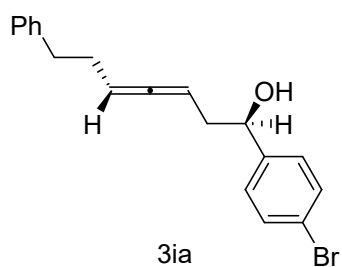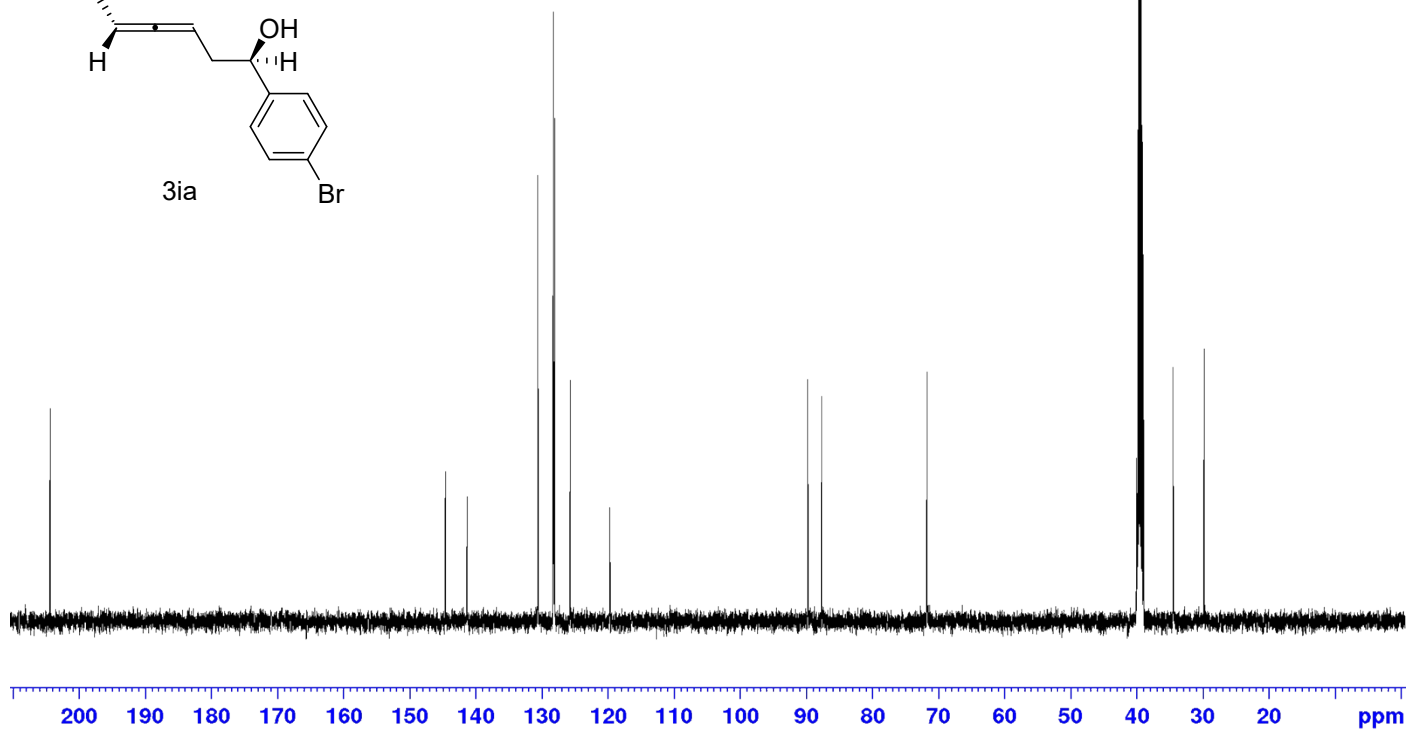

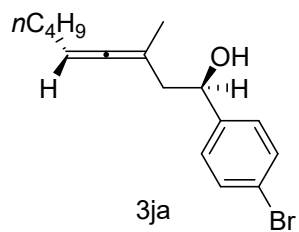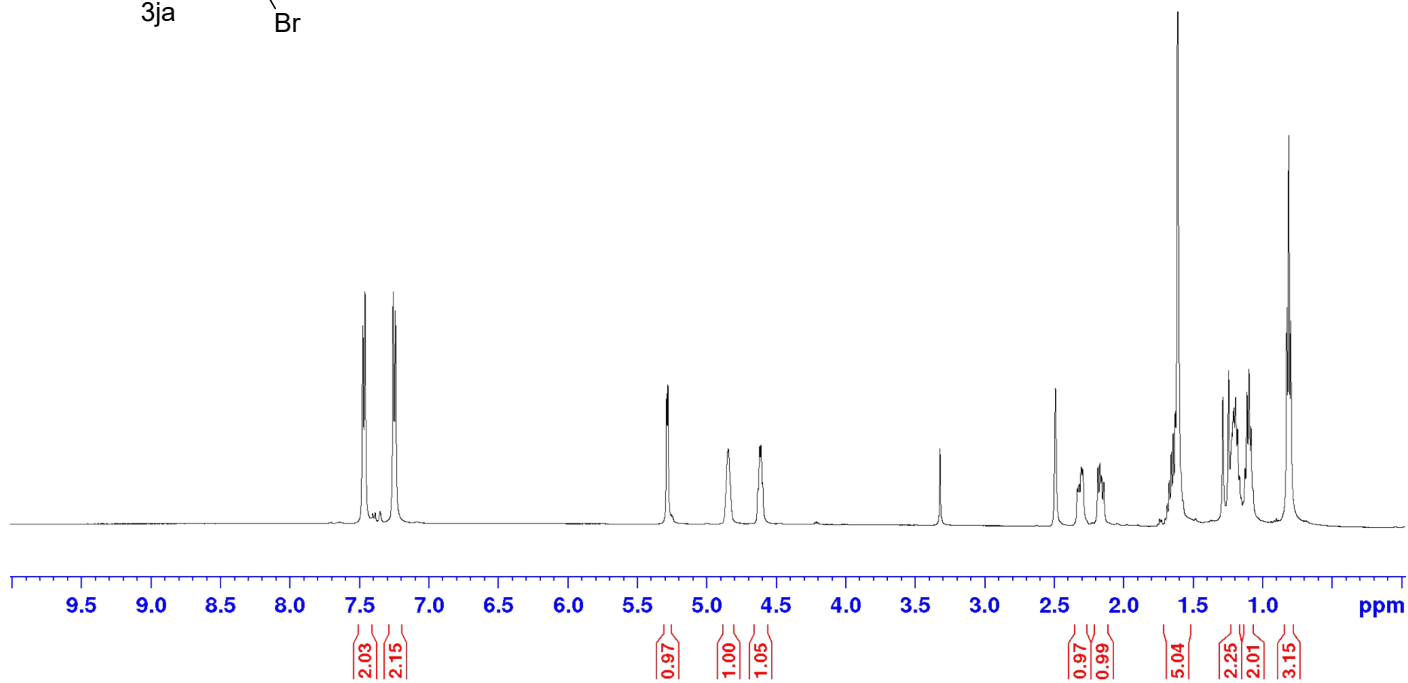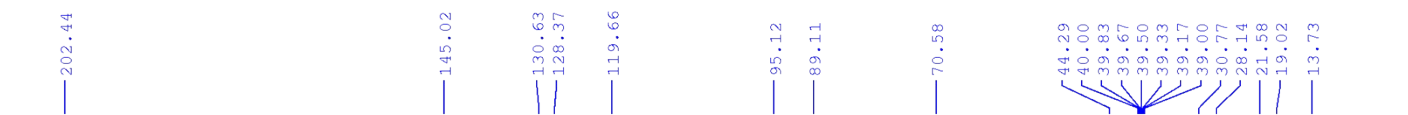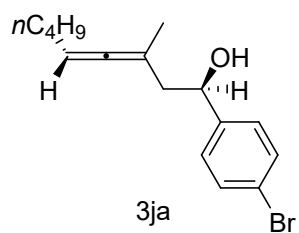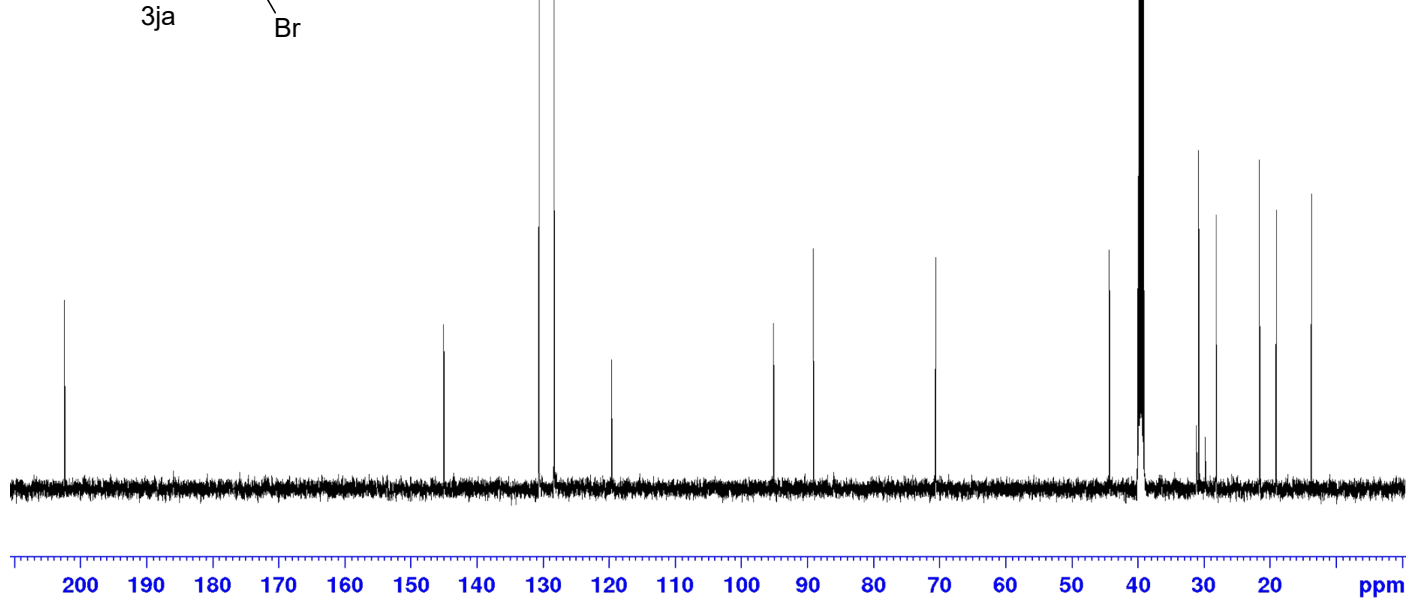

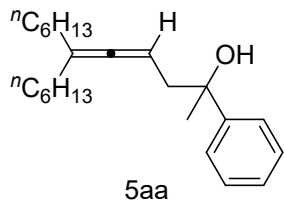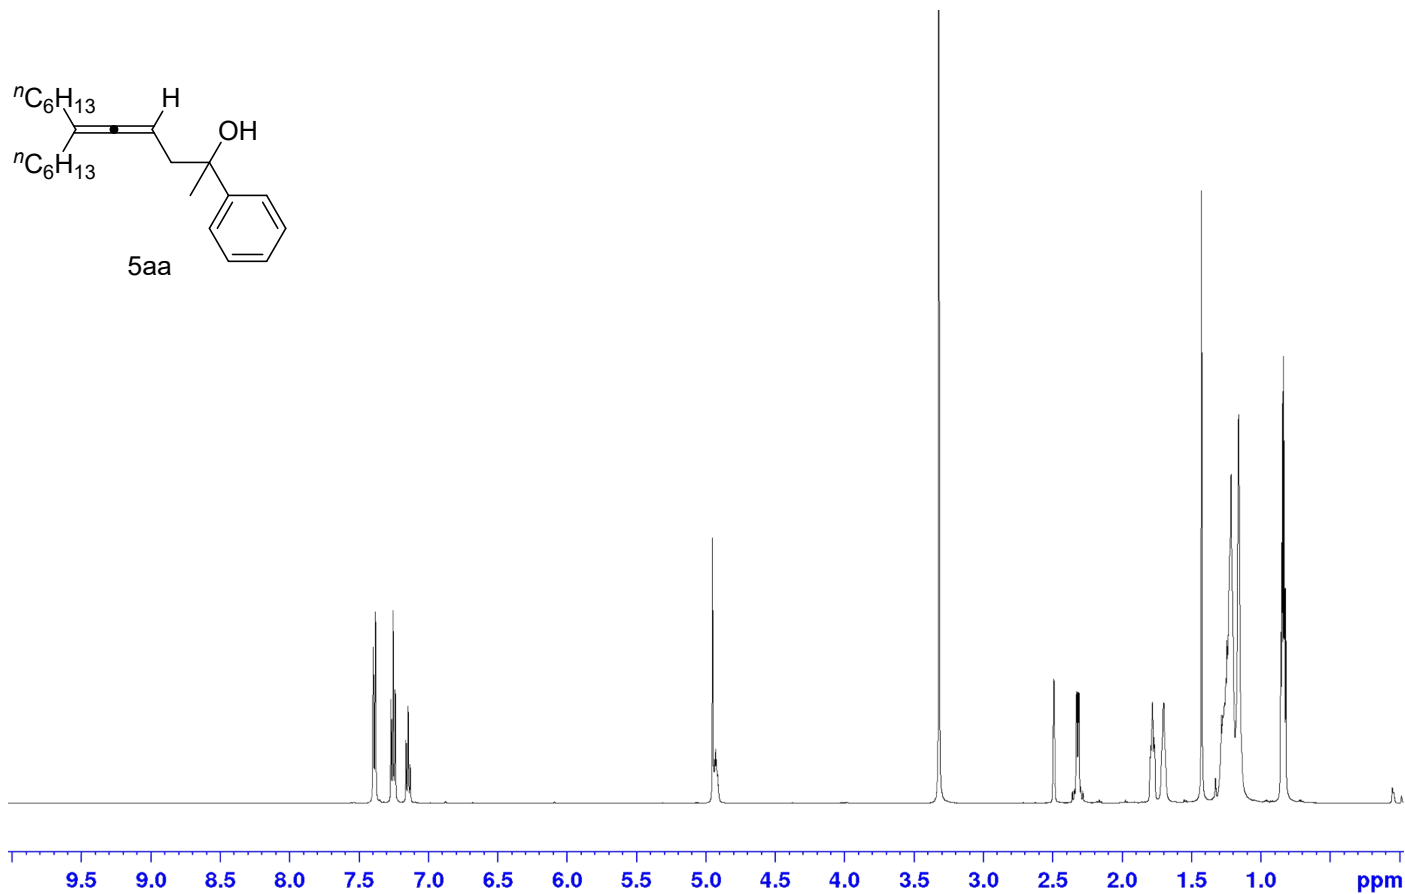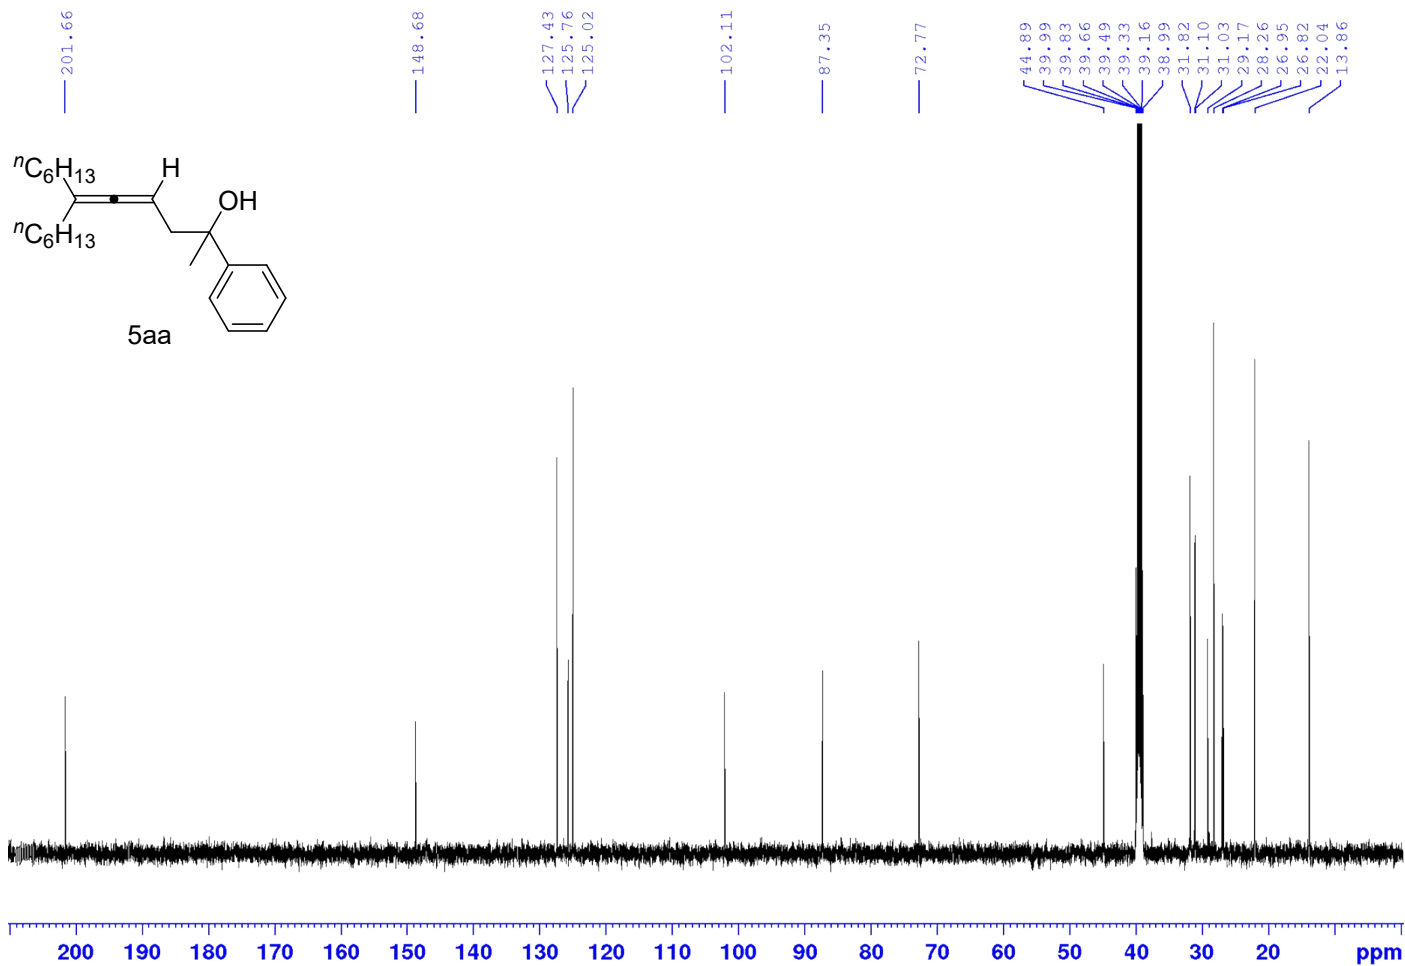

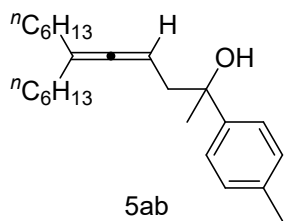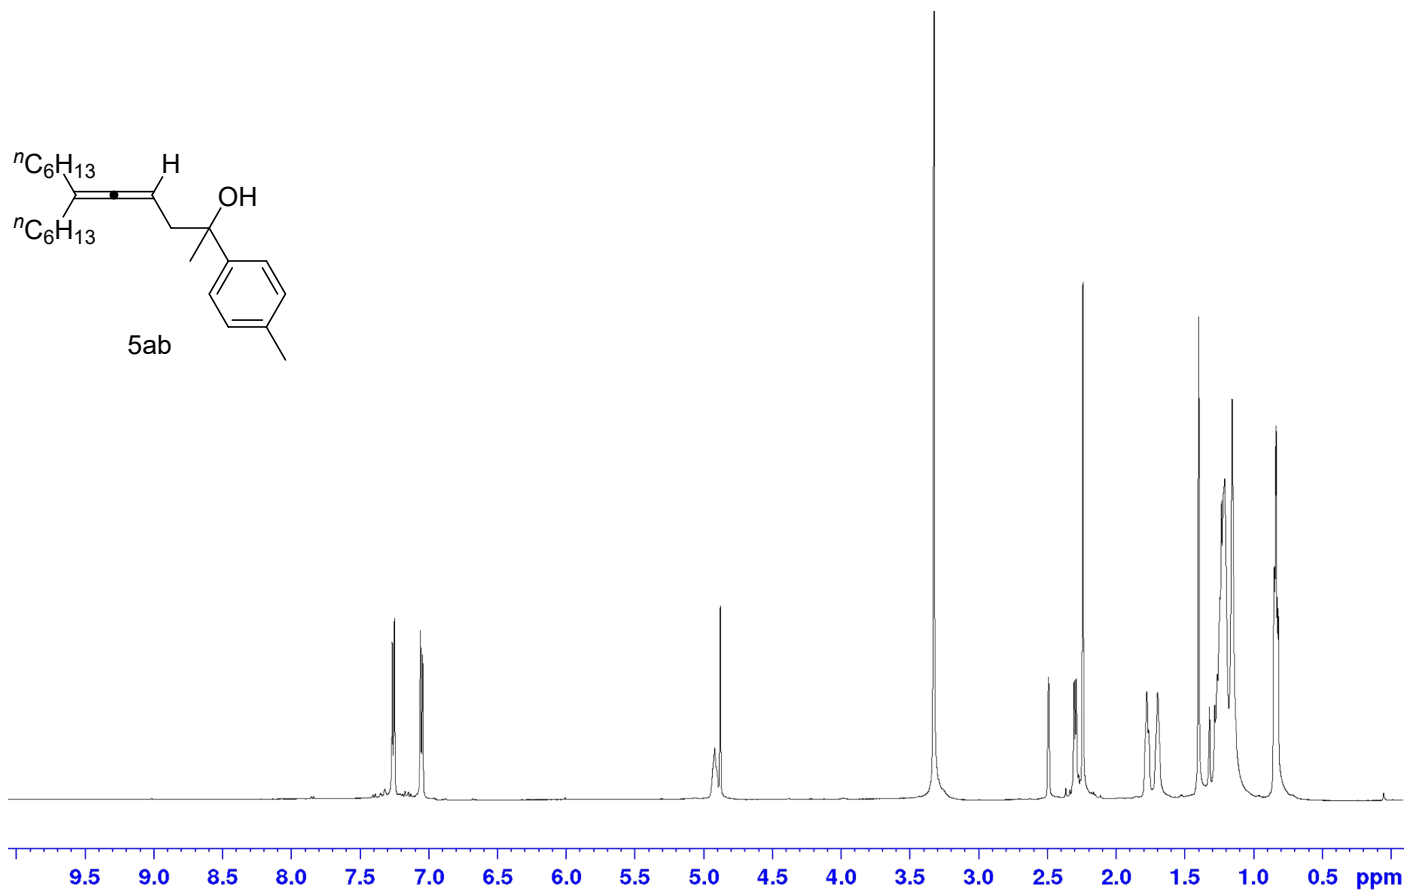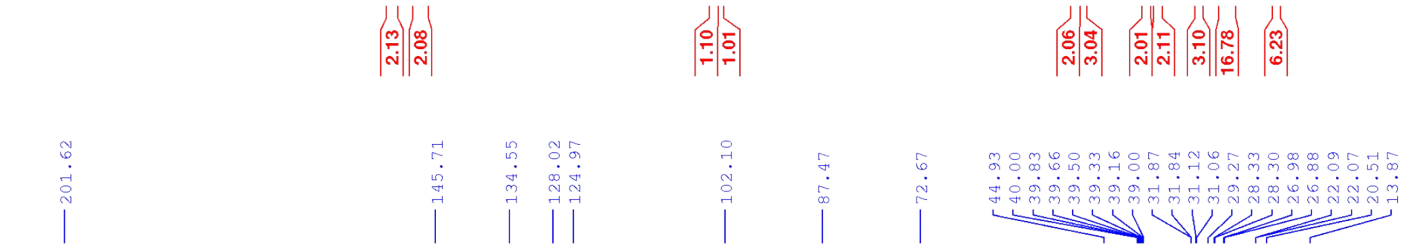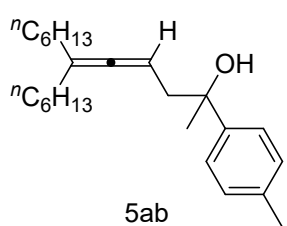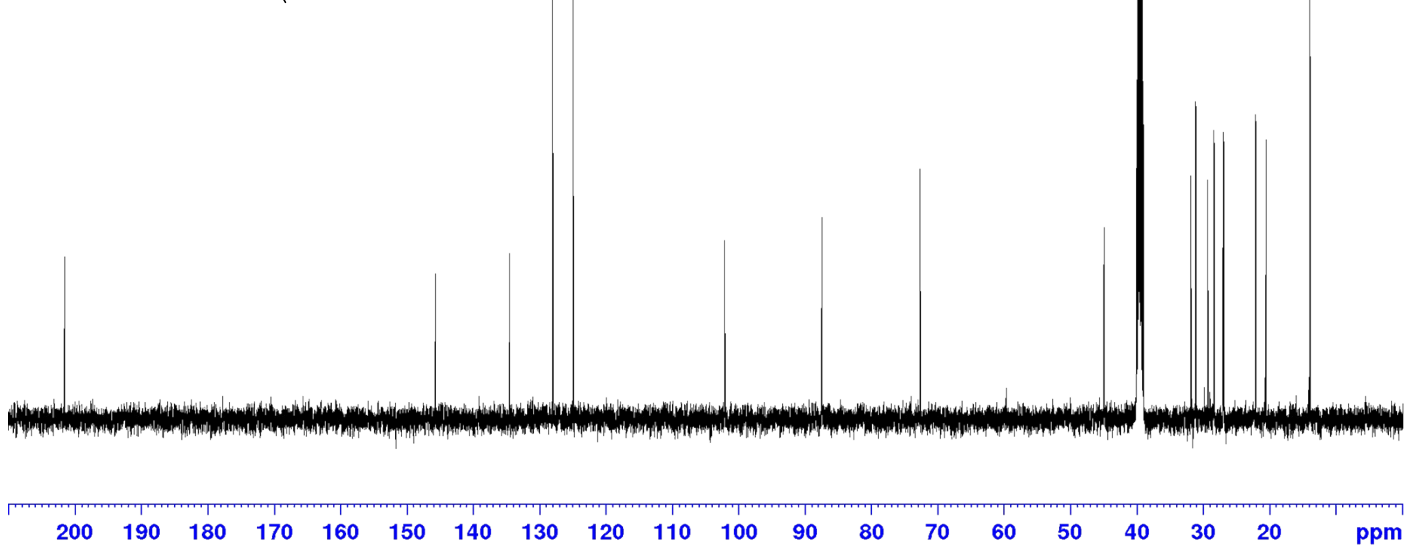

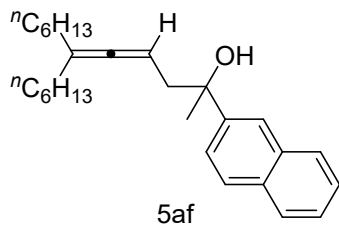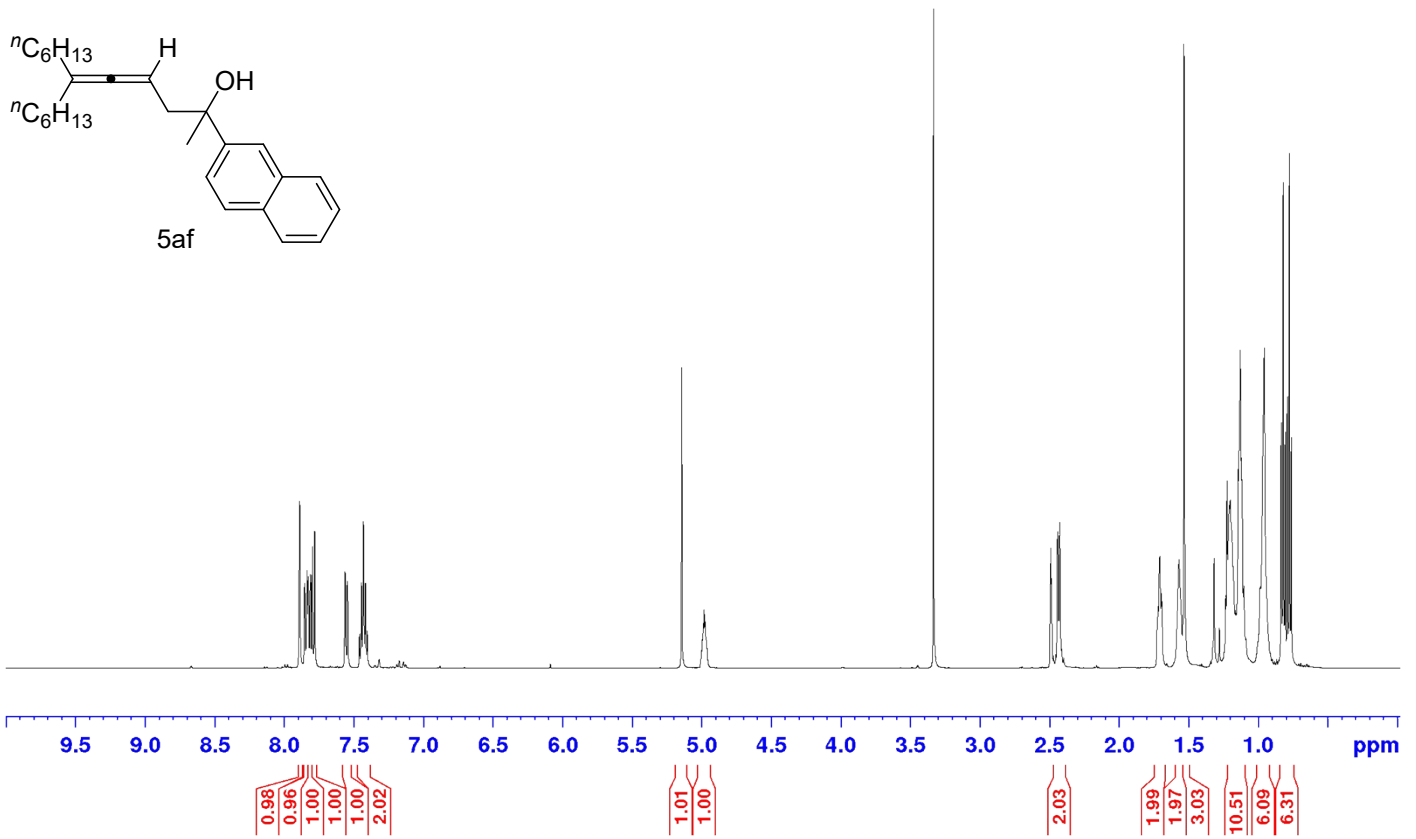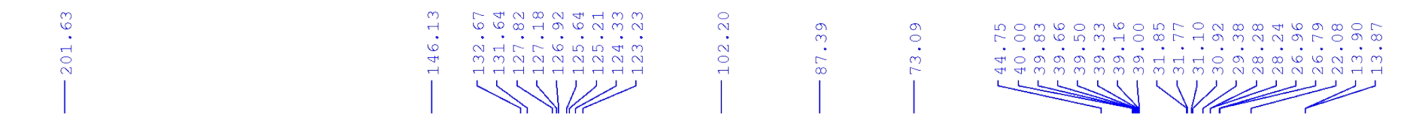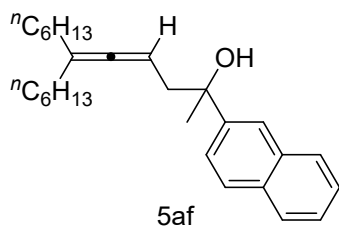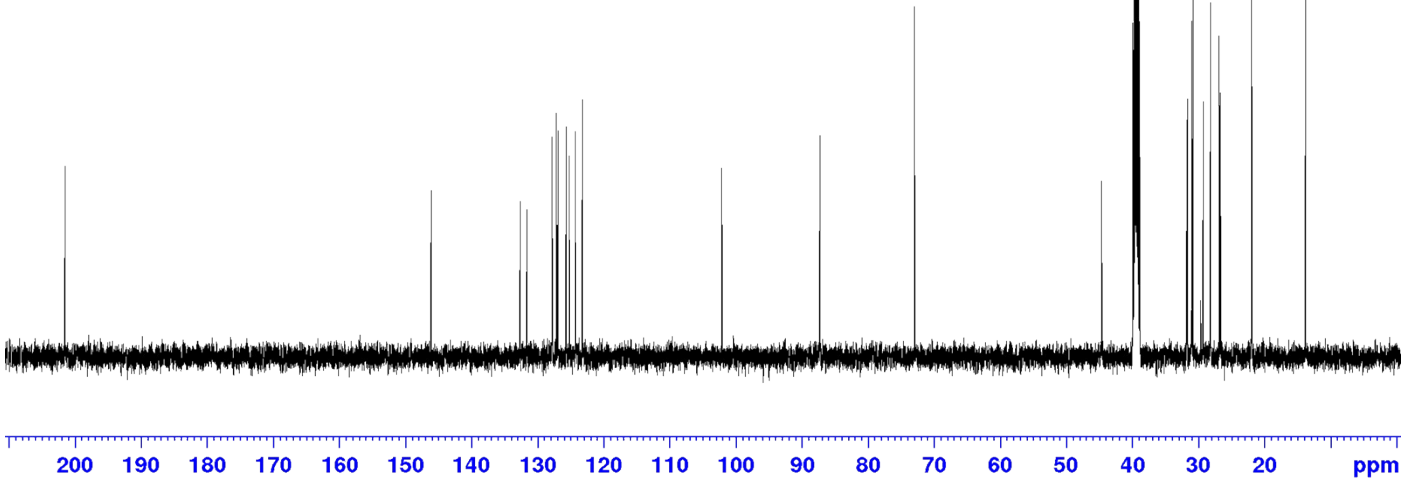

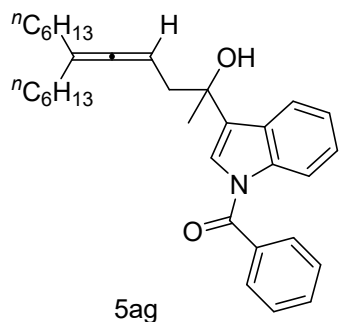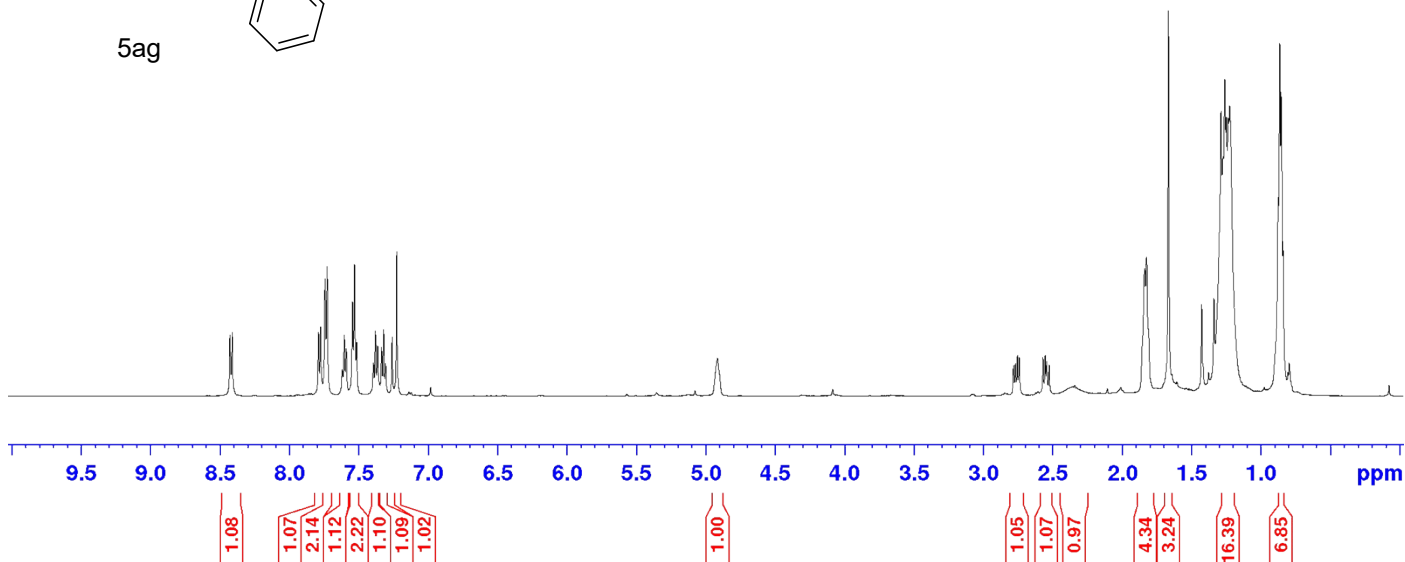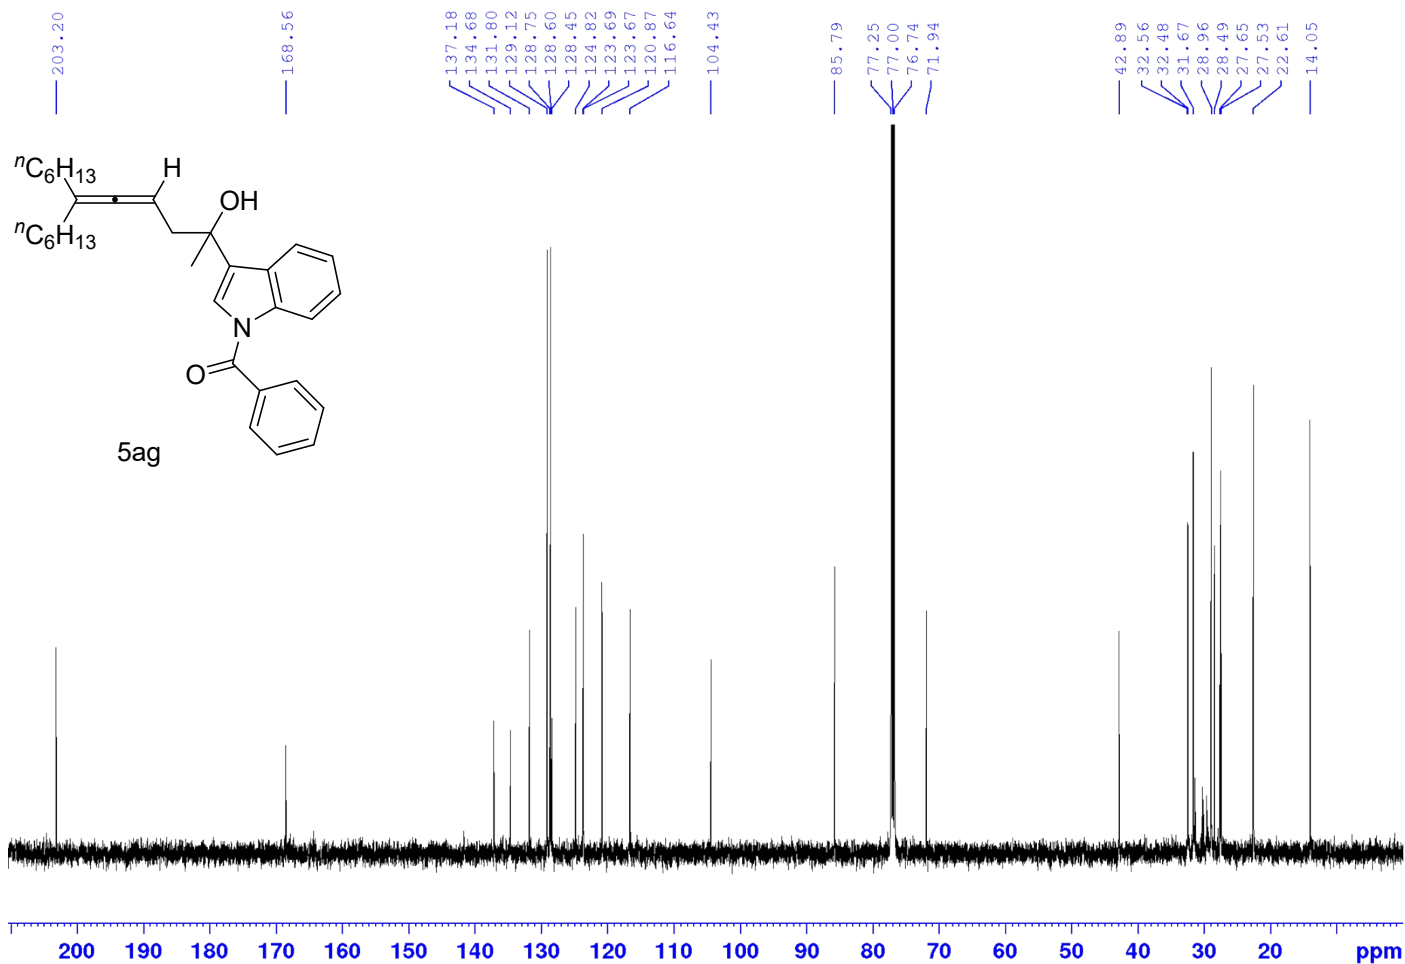

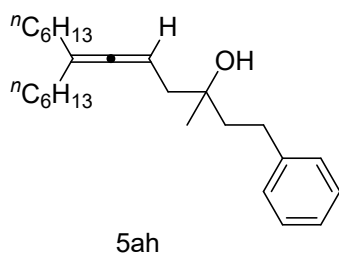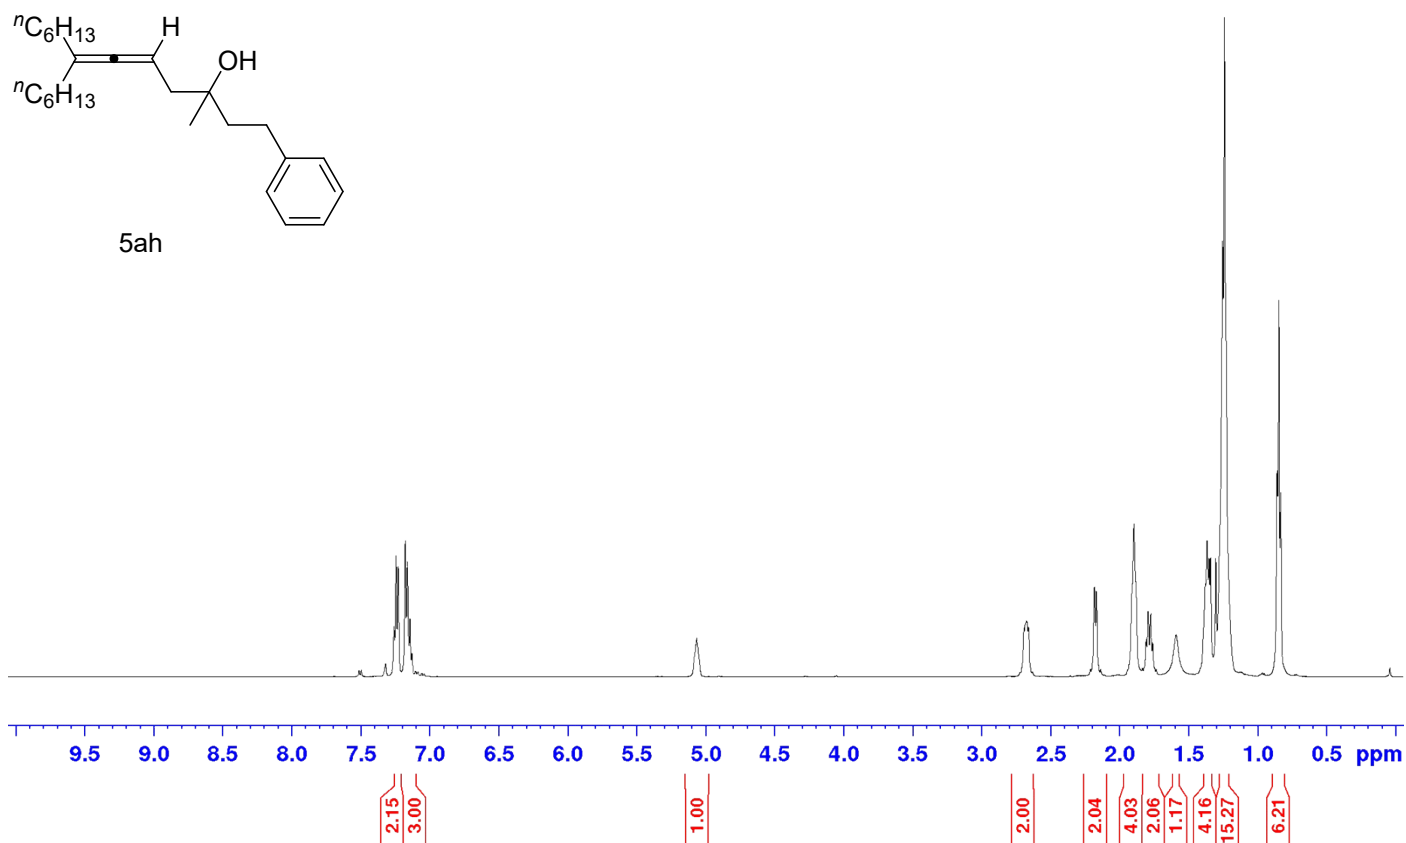

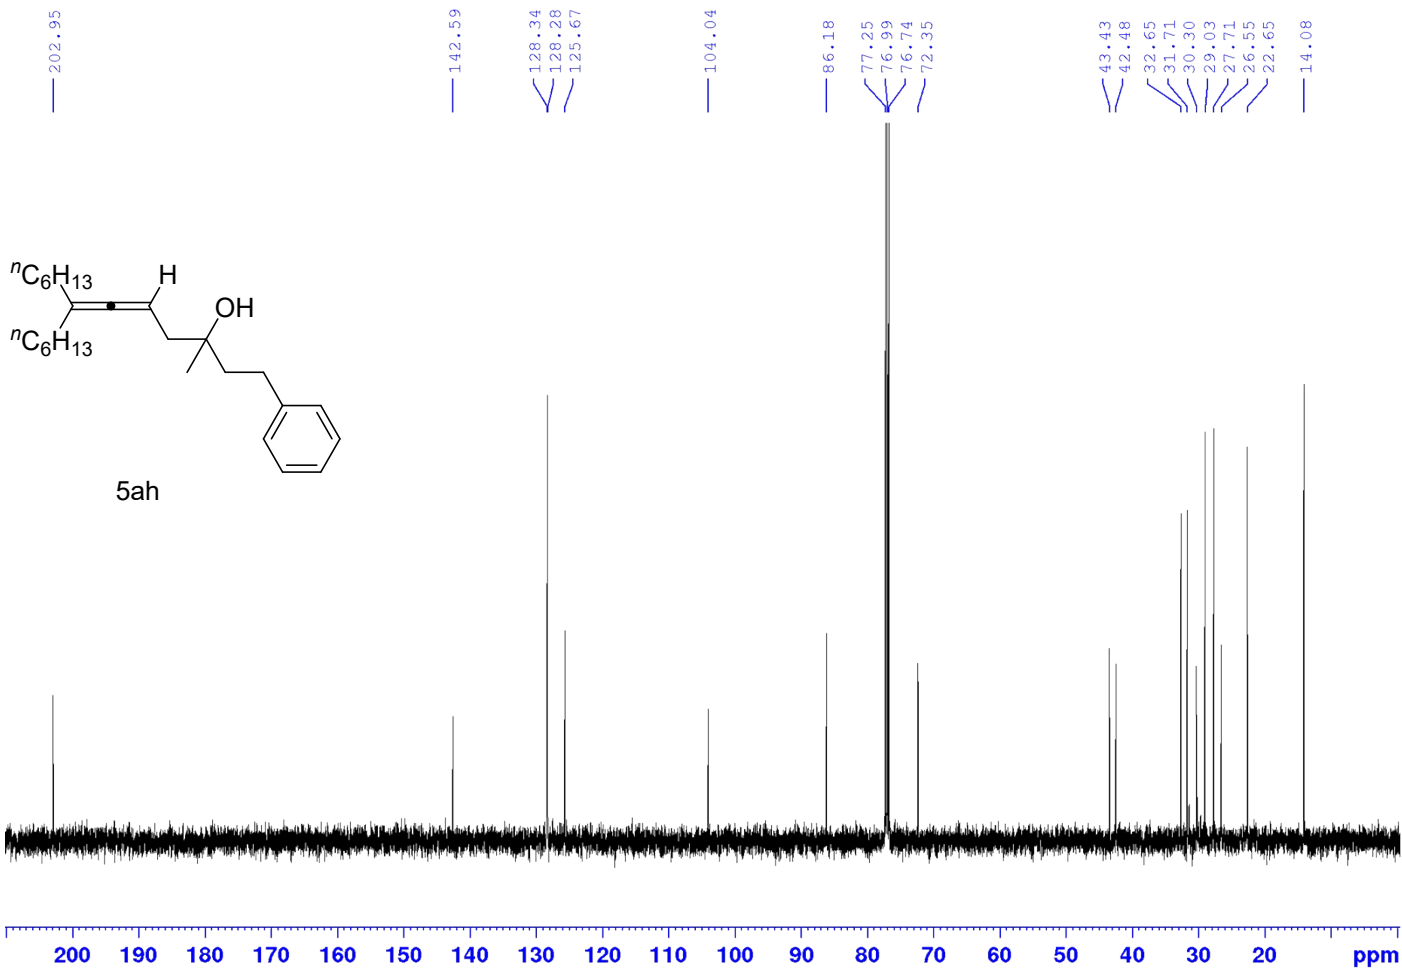



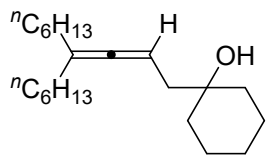

5ai

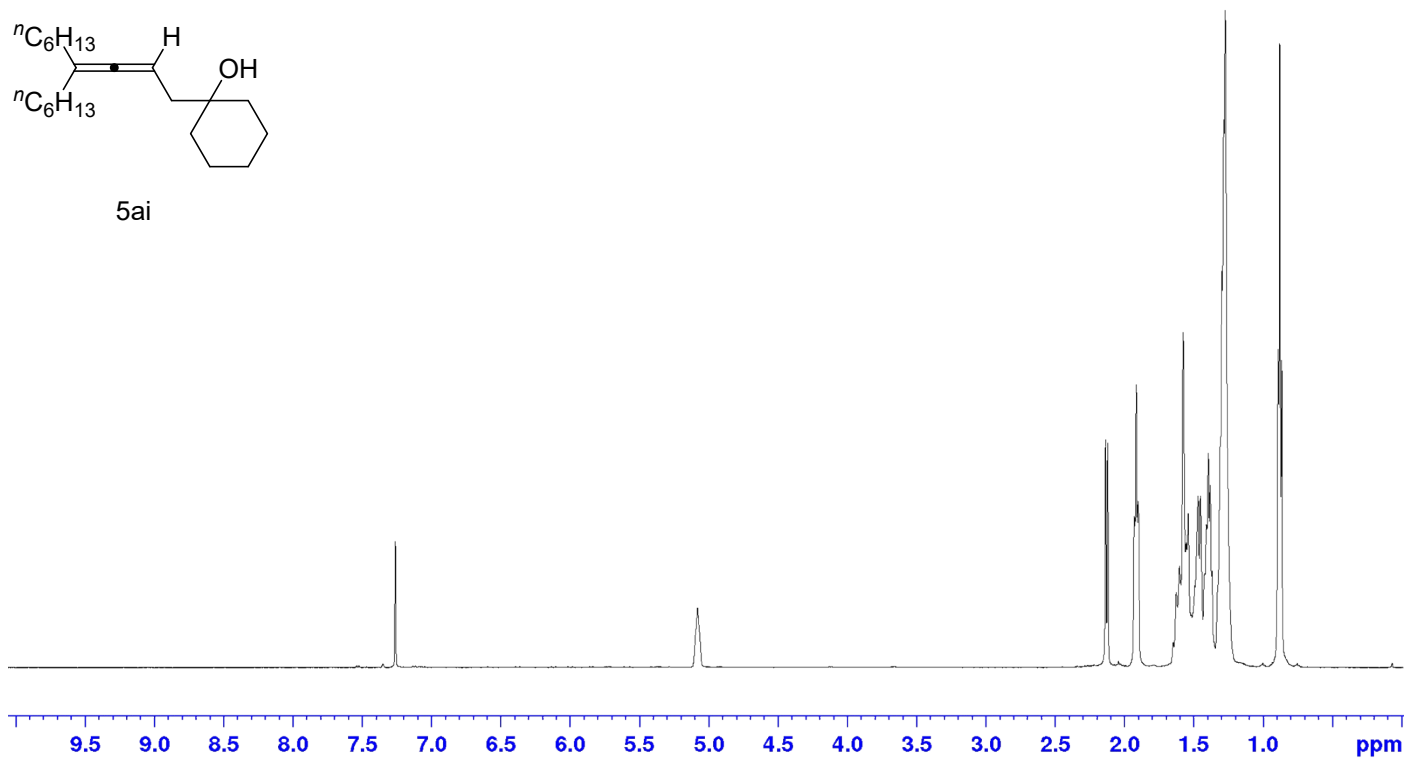

202.89

103.69

85.90

77.25

76.99

76.74

71.22

42.68

37.29

32.67

31.74

29.03

27.70

25.82

22.63

22.26

14.07

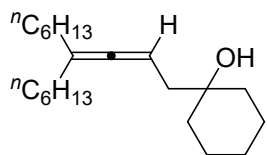

5ai

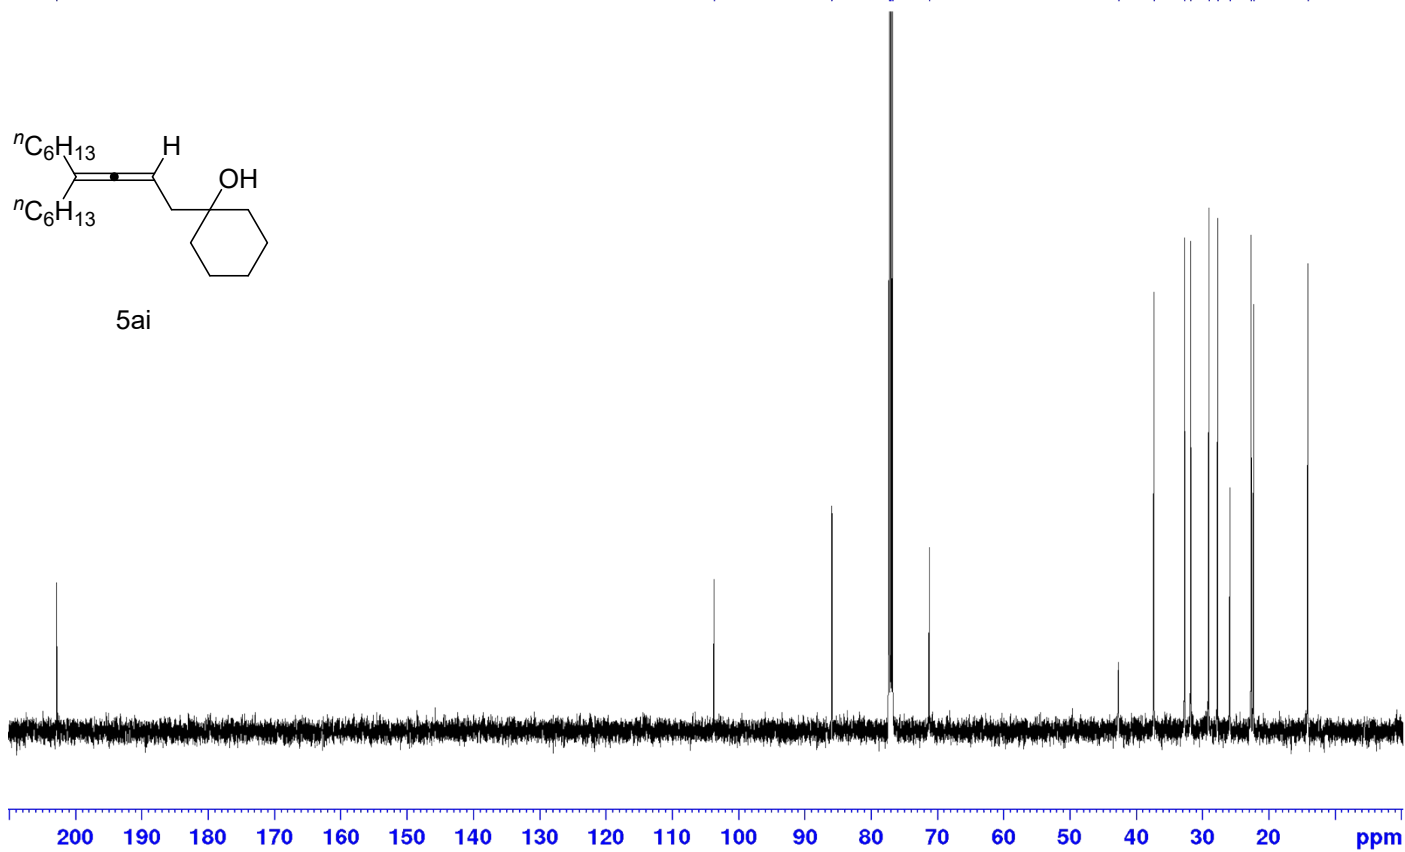

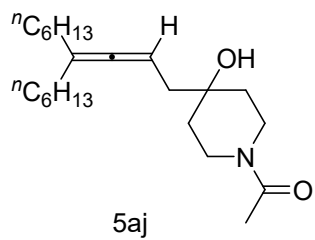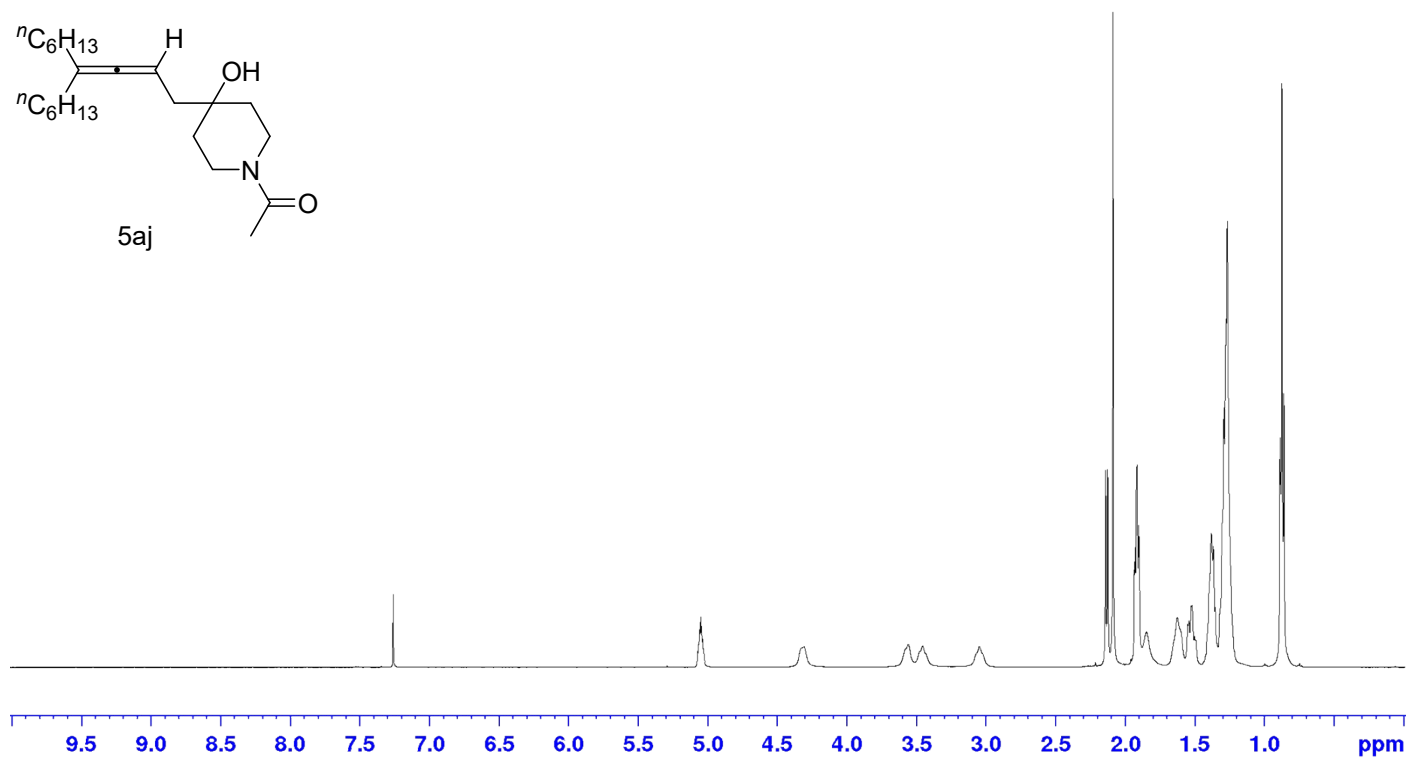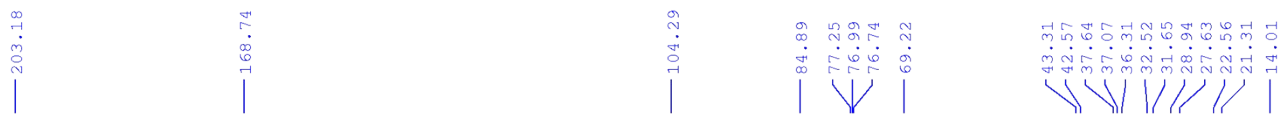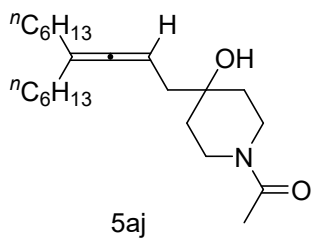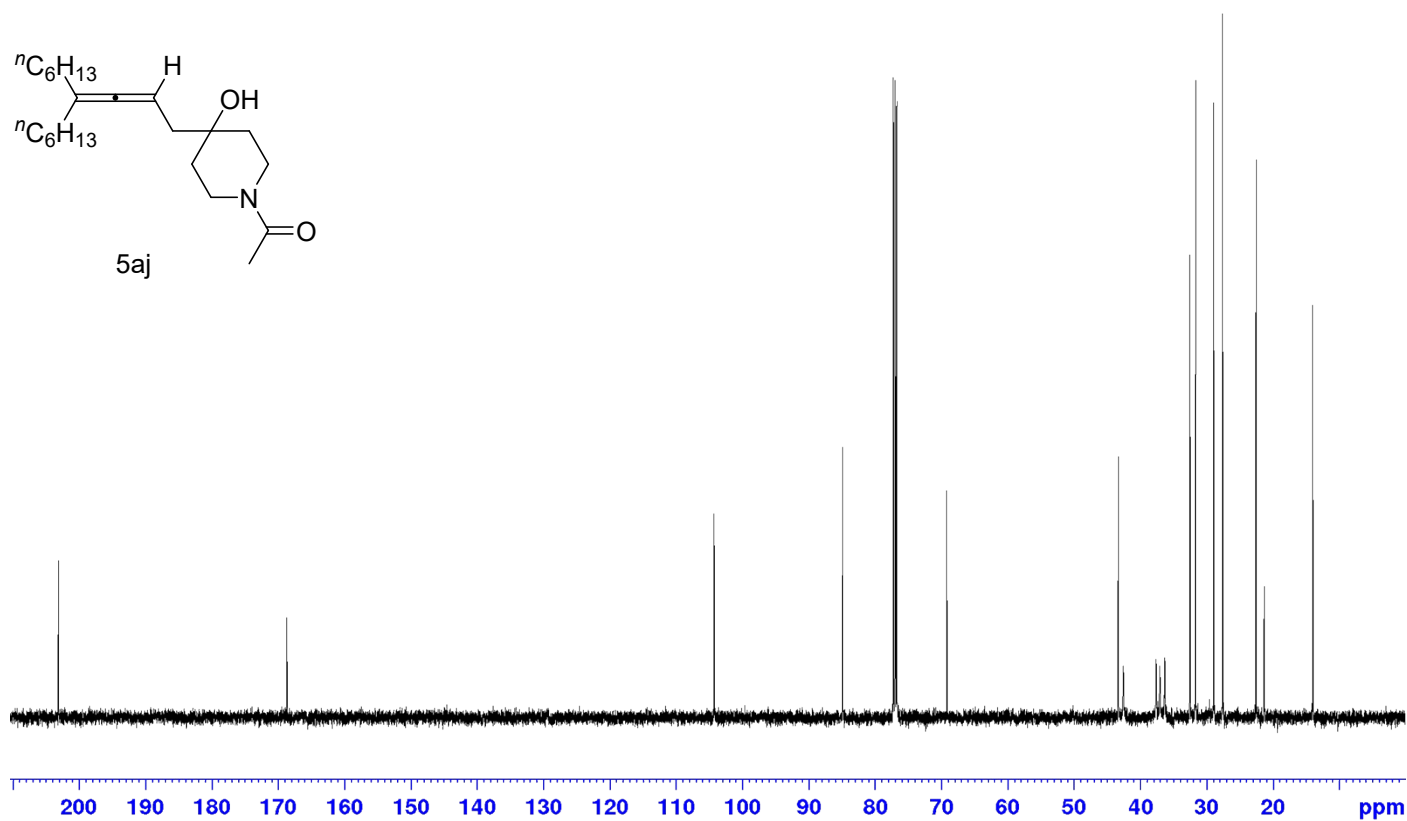

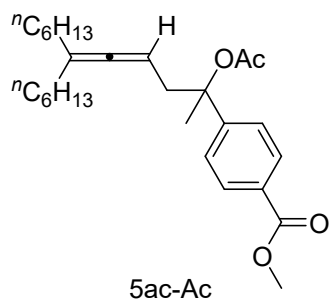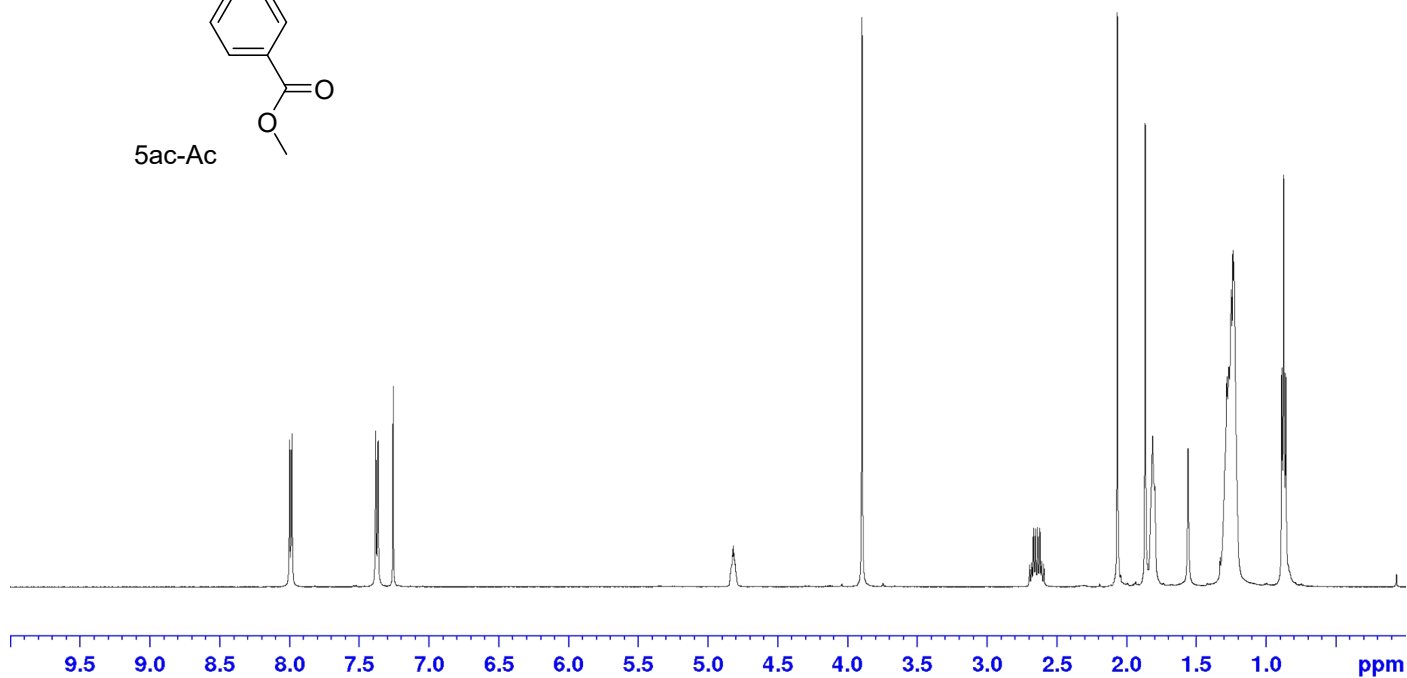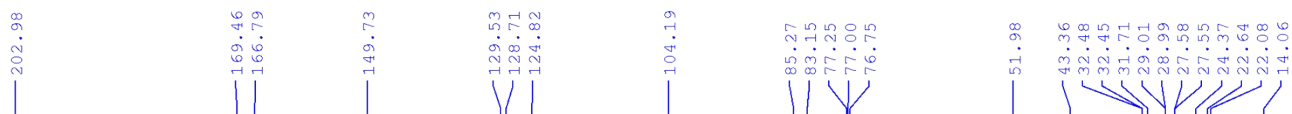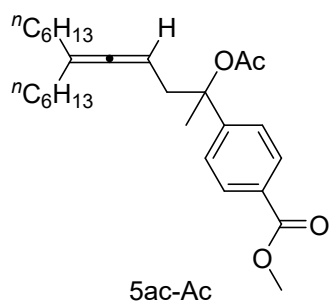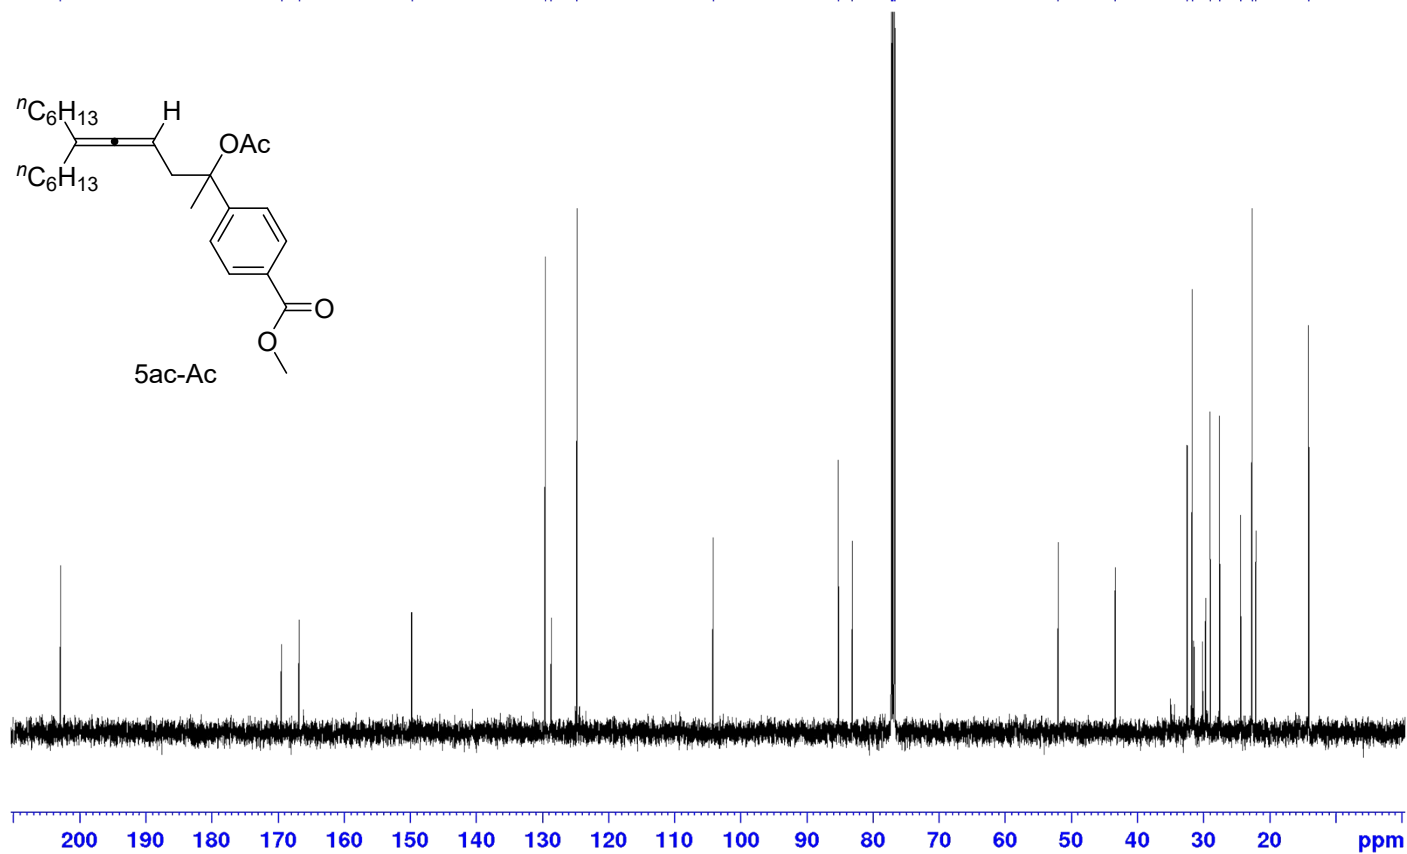

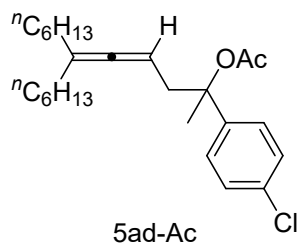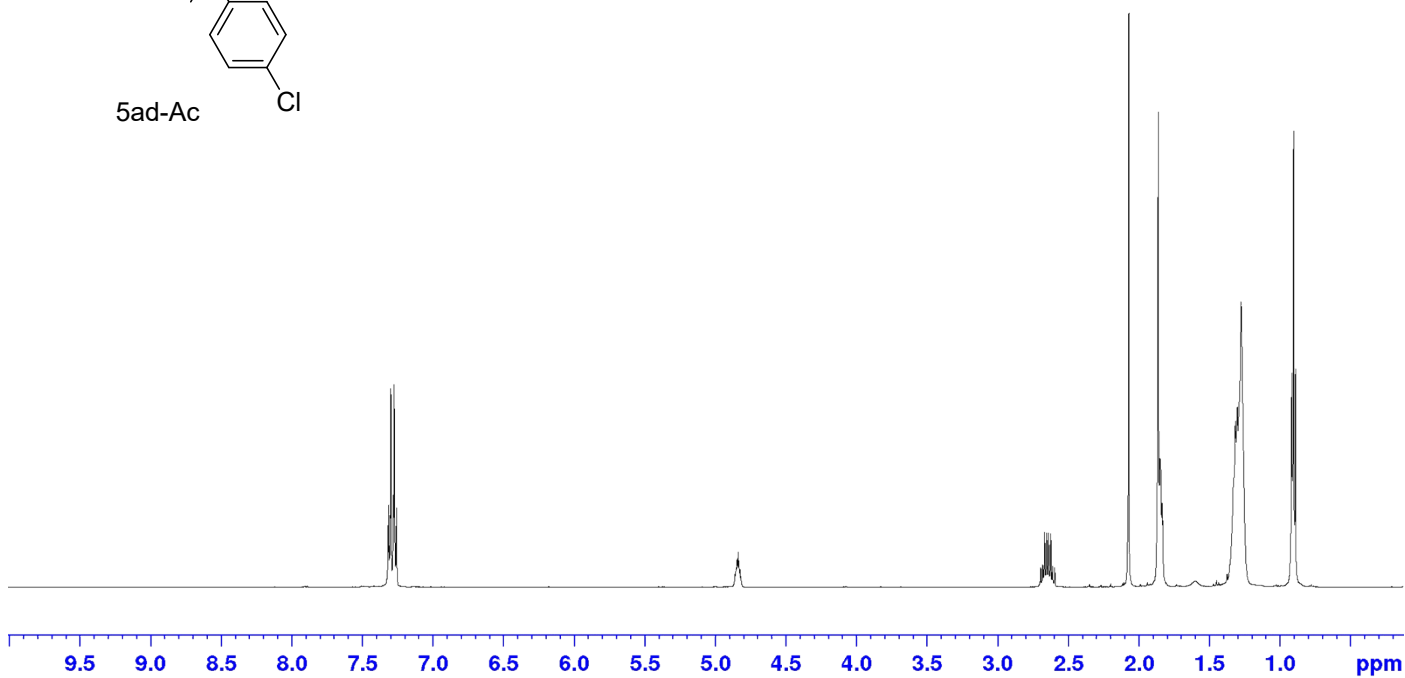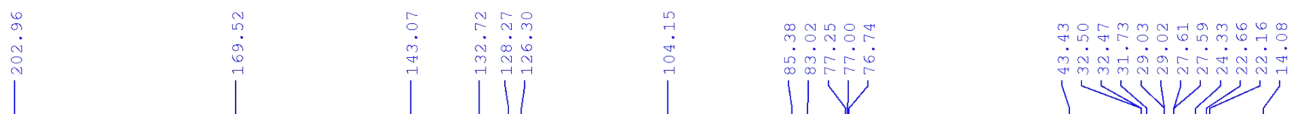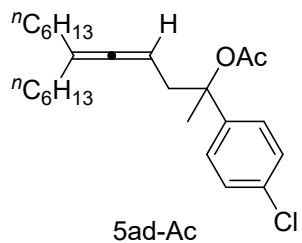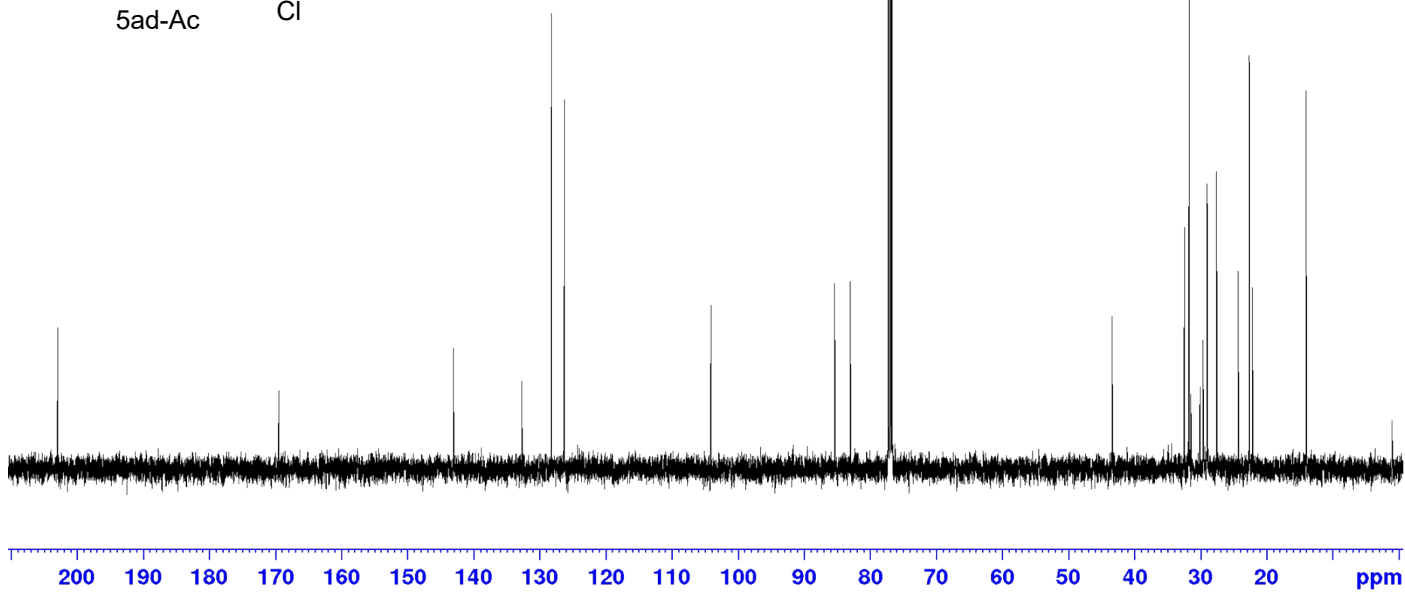

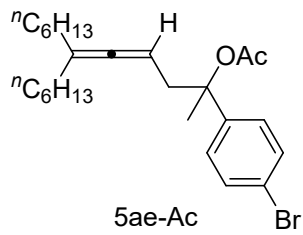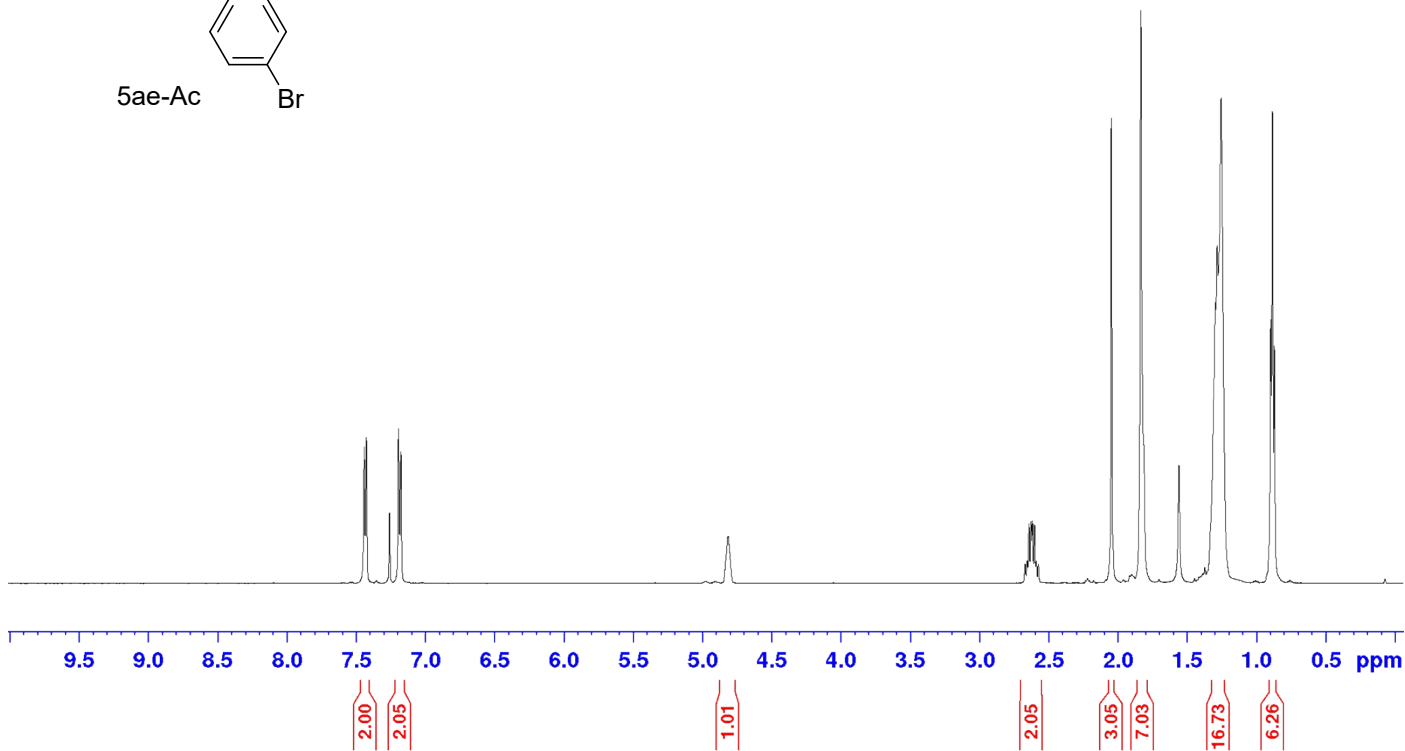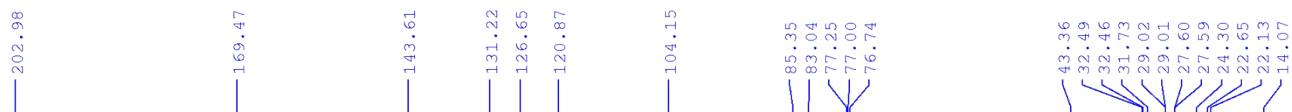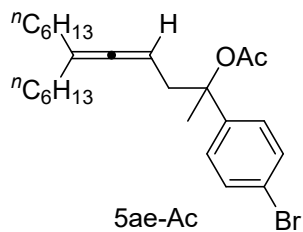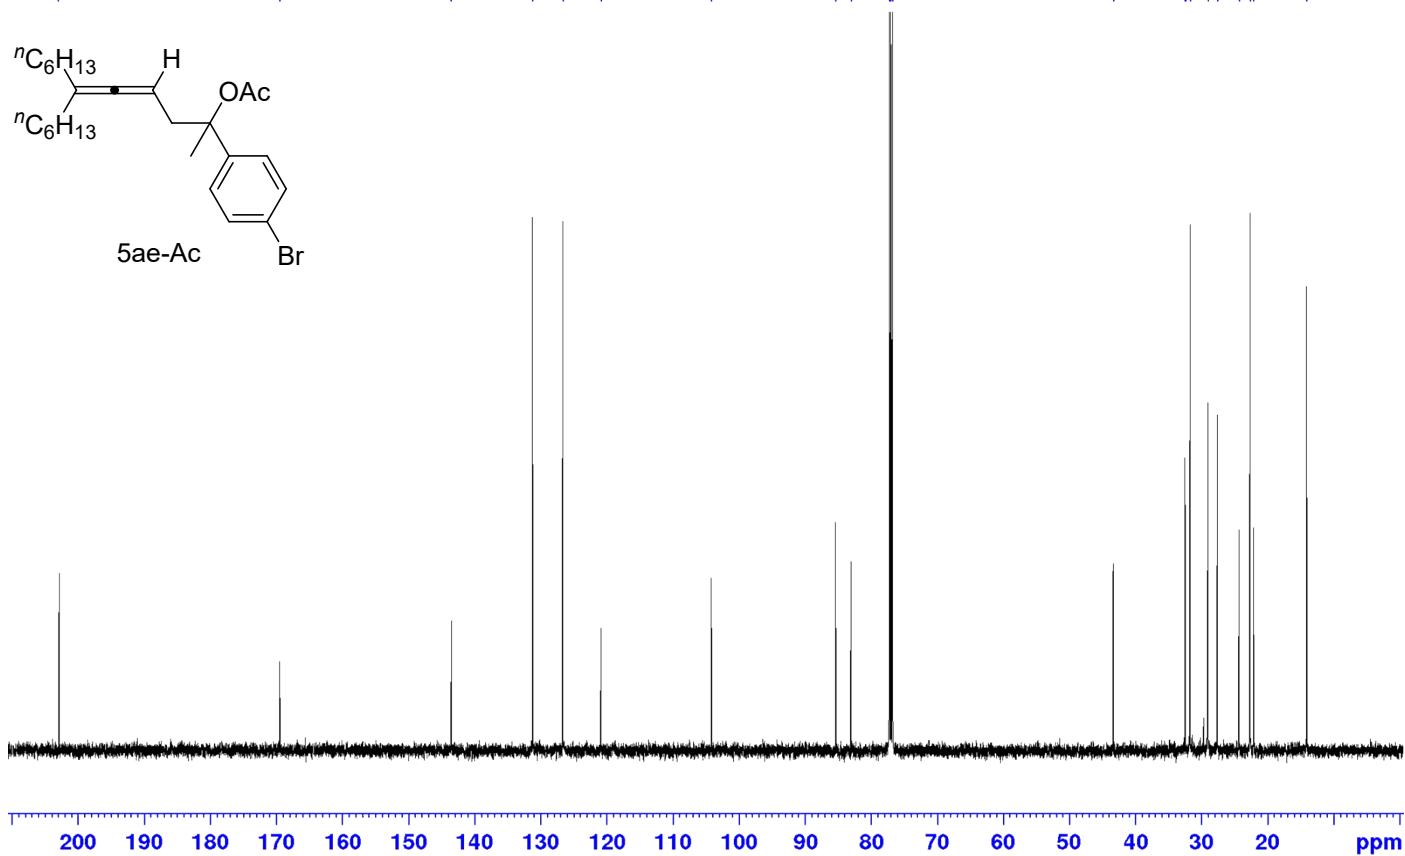

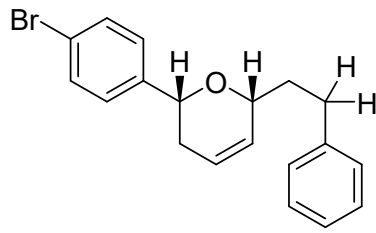

3ia-dihydropyran

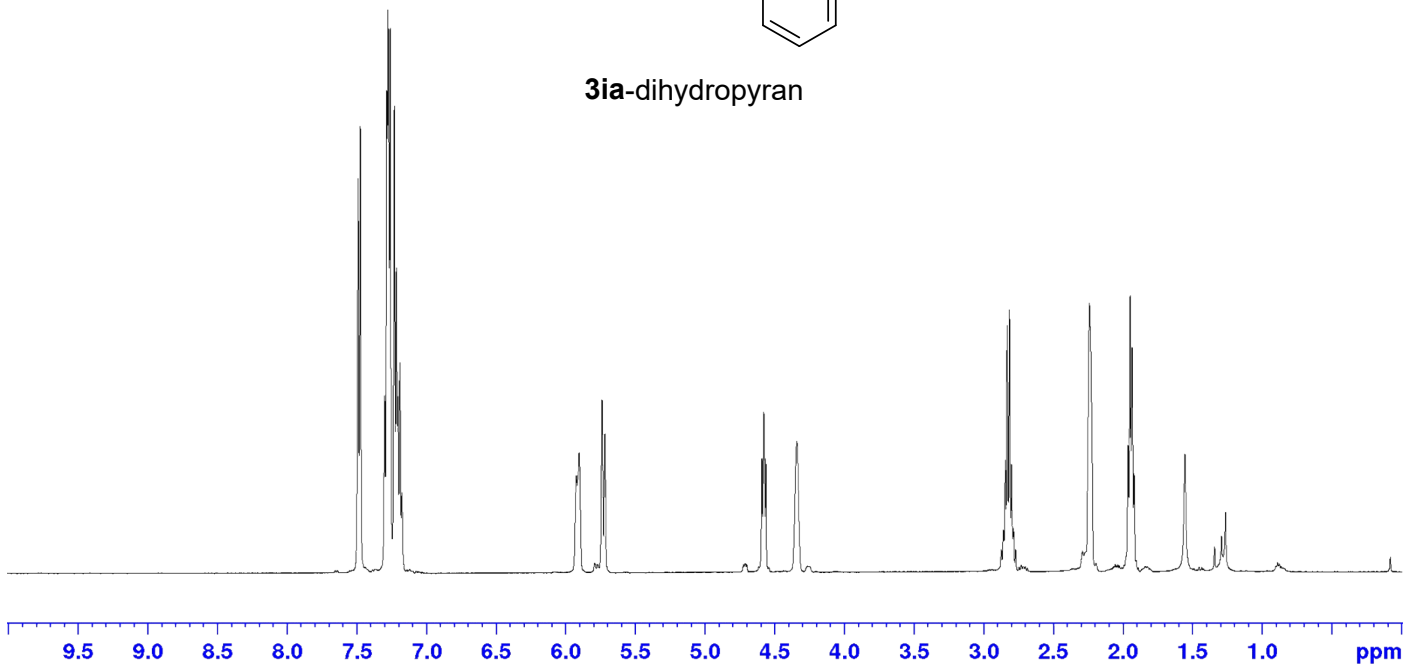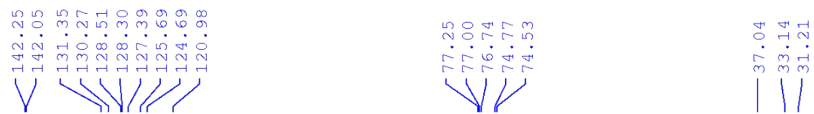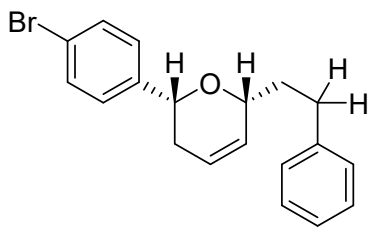

3ia-dihydropyran

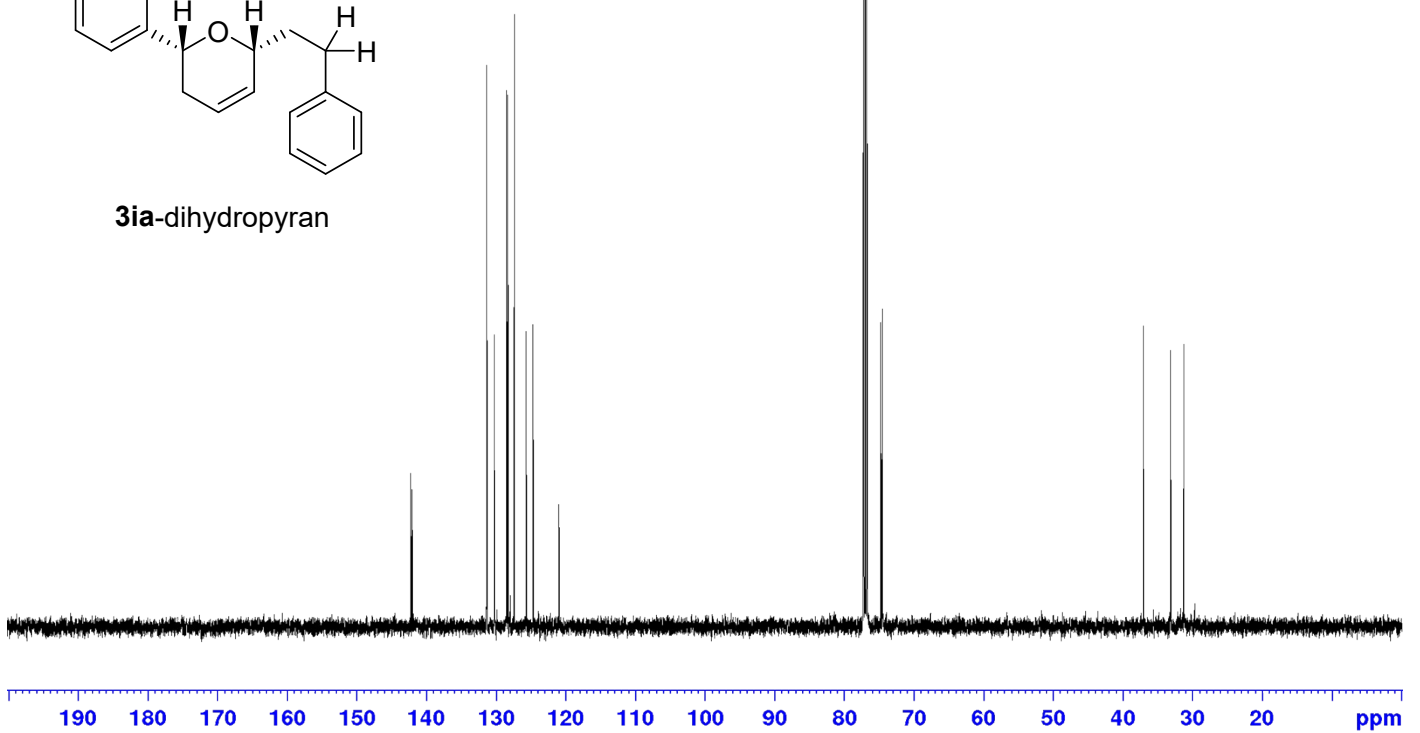

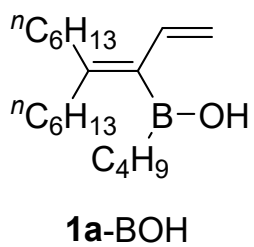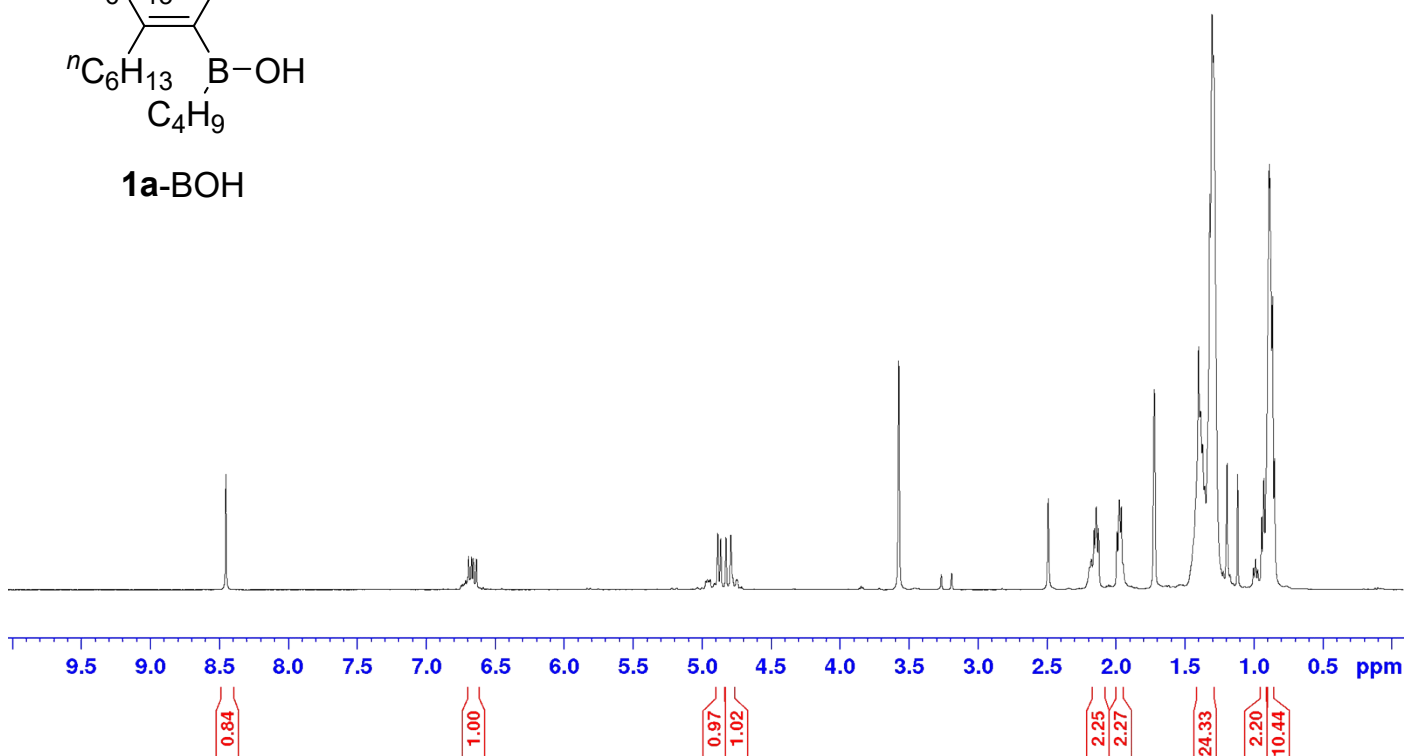

HHX0100029-THF-BOH  
 single pulse decoupled gated NOE

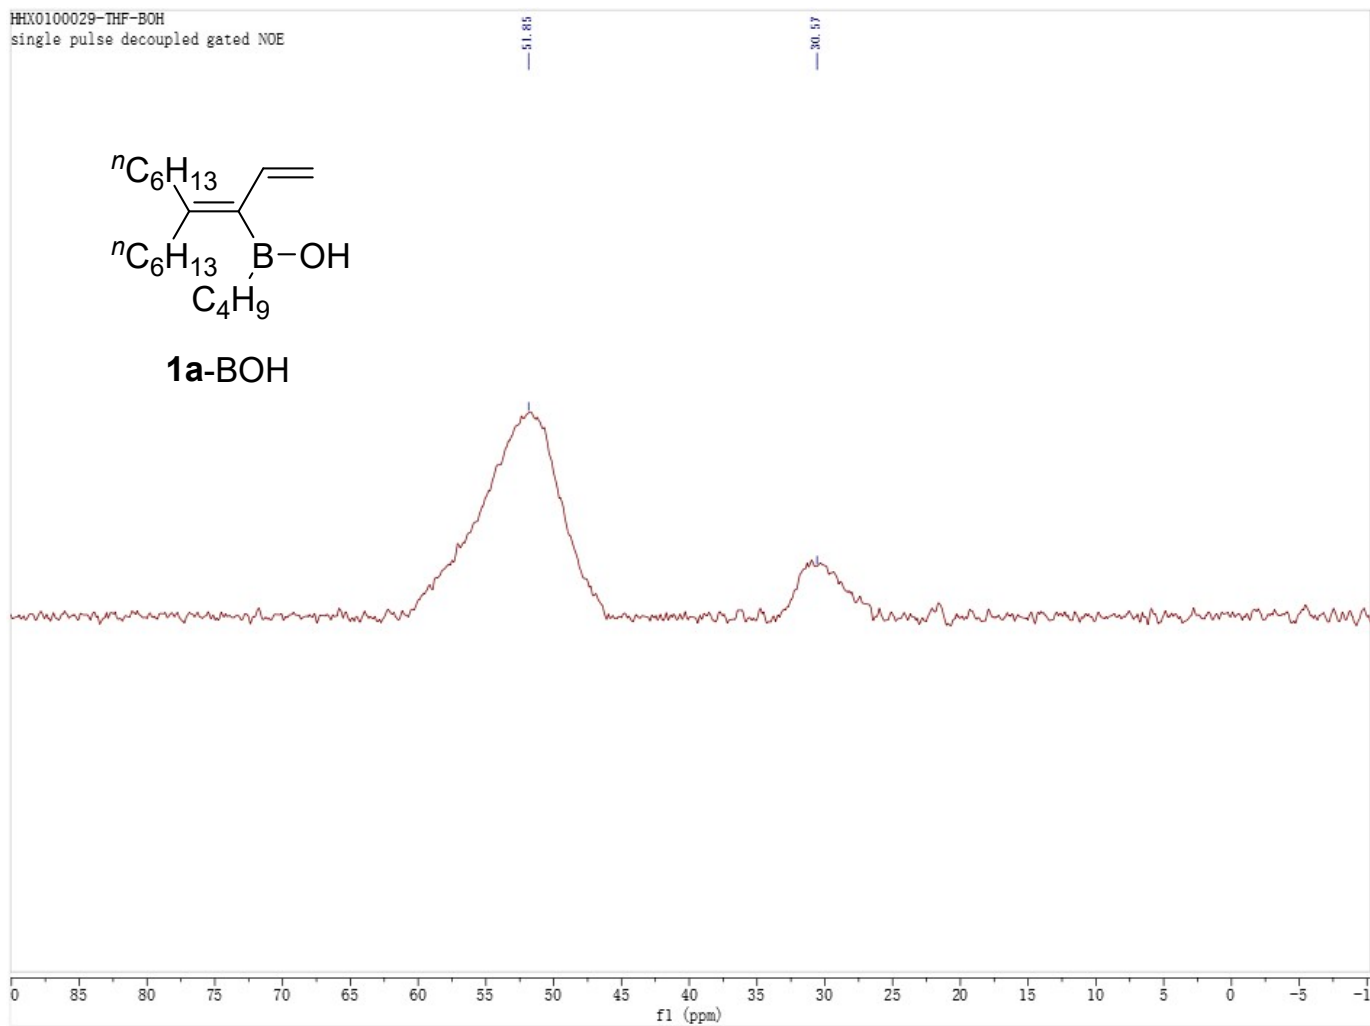

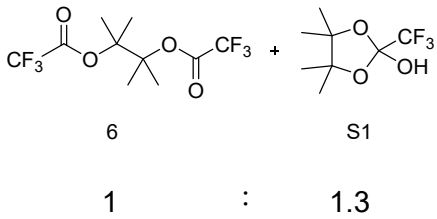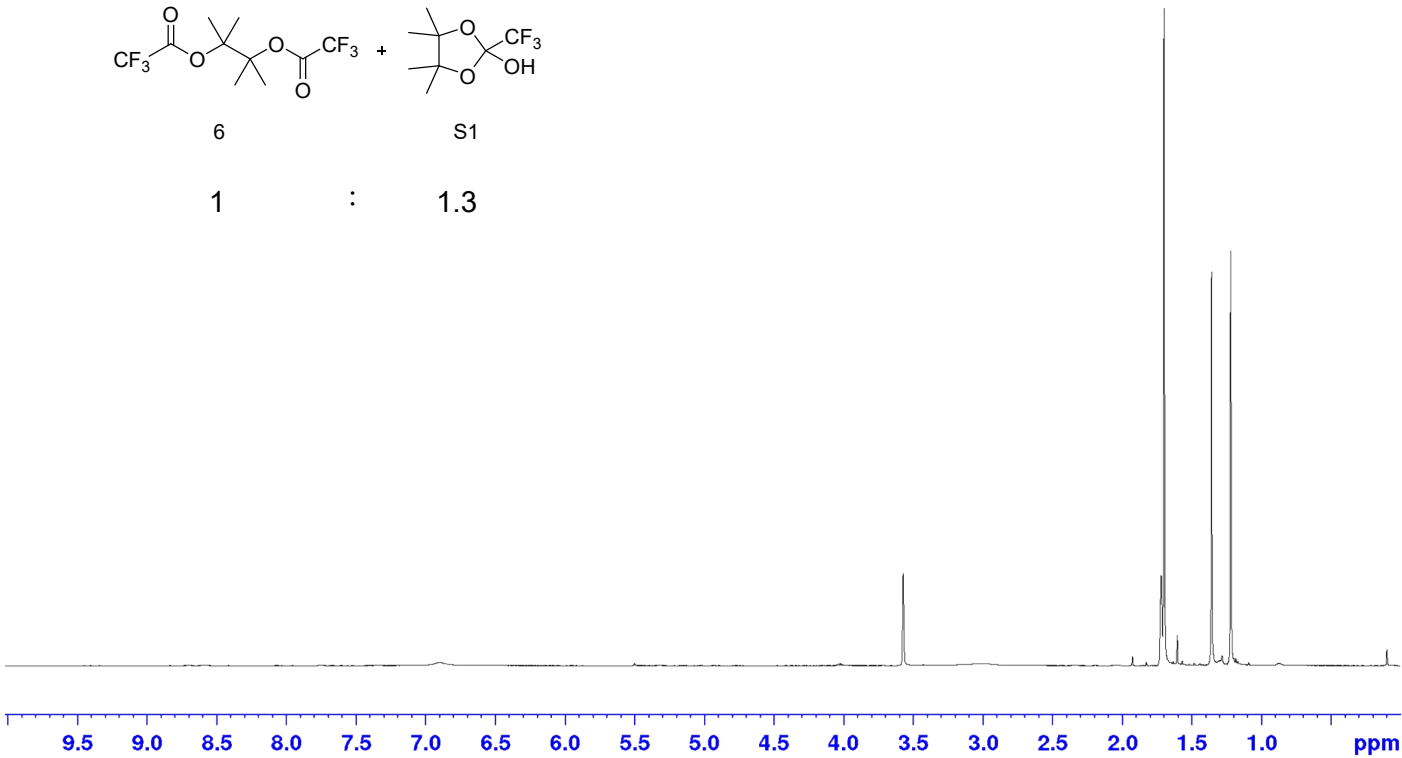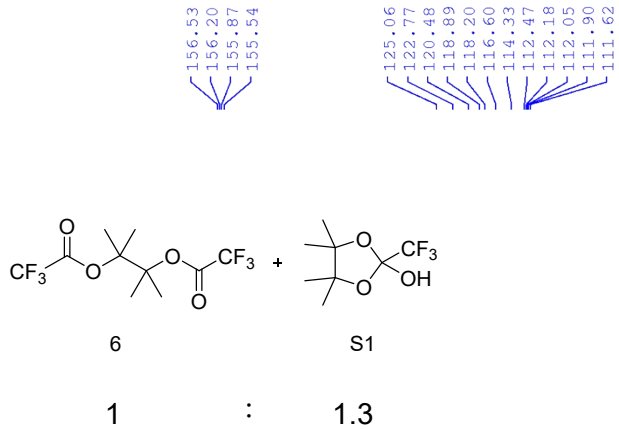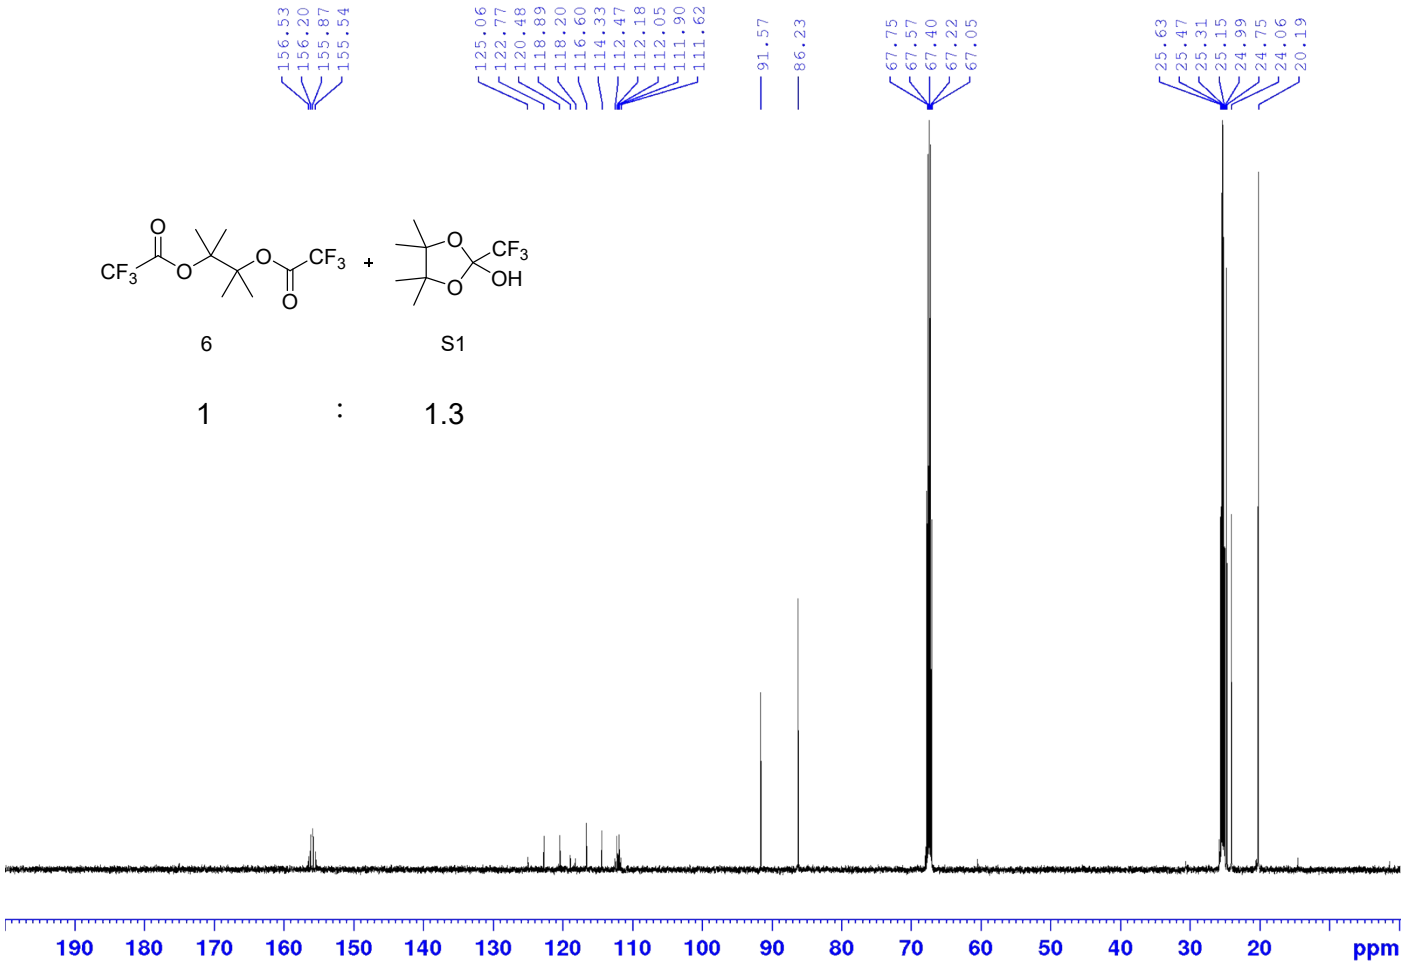

Supplement: d2qo01705a1.pdf [file d2qo01705a1.pdf]
